# Supplementary material for: Geophysical constraints on the reliability of solar and wind power worldwide
Source: PubMed Central journal article supplement (PMC8536784; doi:10.1038/s41467-021-26355-z), 2021-10-22
Supplement: 41467_2021_26355_MOESM3_ESM.pdf [file 41467_2021_26355_MOESM3_ESM.pdf]

### **Description of Additional Supplementary Files**

File Name: Supplementary Data 1

Description: Summary of collected country (or region)-level electricity demand data.

File Name: Supplementary Data 2

Description: The estimates of Kendall correlation coefficients between solar and wind resources.

File Name: Supplementary Data 3

Description: Summary of land area and system reliability.

File Name: Supplementary Data 4

Description: Classification of multinational regions and continents.

File Name: Supplementary Data 5

Description: Summary of installed capacities by varying the solar and wind resource mix, and energy storage.

File Name: Supplementary Data 6

Description: Average hourly power supply gaps.
