# Supplementary material for: Geophysical constraints on the reliability of solar and wind power worldwide
Source: Nat Commun. 2021 Oct 22;12:6146. doi: 10.1038/s41467-021-26355-z (PMC8536784; doi:10.1038/s41467-021-26355-z)
Supplement: Supplementary file 9 — Supplementary Data 6 [file 41467_2021_26355_MOESM9_ESM.xlsx]

## Sheet: Supplementary Data 6
Average power supply gaps.
	1x generation without storage																1x generation with 3h storage																1x generation with 12h storage																1.5x generation without storage
Hour	Russia	Canada	United_States	China	Brazil	Australia	India	Algeria	Mexico	South_Africa	France	Japan	Germany	New_Zealand	United_Kingdom	South_Korea	Russia	Canada	United_States	China	Brazil	Australia	India	Algeria	Mexico	South_Africa	France	Japan	Germany	New_Zealand	United_Kingdom	South_Korea	Russia	Canada	United_States	China	Brazil	Australia	India	Algeria	Mexico	South_Africa	France	Japan	Germany	New_Zealand	United_Kingdom	South_Korea	Russia
0	0.55192	0.61677	0.634649	0.651363	0.731377	0.704512	0.834869	0.787362	0.782274	0.834806	0.933183	0.934402	0.975814	0.96052	0.946869	0.994616	0.552405	0.61677	0.694165	0.692902	0.777197	0.715816	0.855584	0.800021	0.821627	0.867123	0.937559	0.943575	0.975883	0.965784	0.949946	0.995323	0.551815	0.615542	0.717763	0.780908	0.85316	0.703413	0.881953	0.85206	0.909633	0.924058	0.937082	0.960385	0.975744	0.969555	0.950207	0.994985	0.328608
1	0.547857	0.610486	0.625434	0.641394	0.719384	0.687182	0.821207	0.776705	0.773095	0.827022	0.92586	0.931611	0.970272	0.958774	0.94185	0.992745	0.547617	0.610486	0.685446	0.685303	0.766634	0.702254	0.845169	0.783121	0.811911	0.859572	0.930725	0.941328	0.97083	0.964267	0.945074	0.993688	0.546657	0.609412	0.709349	0.77405	0.848834	0.685198	0.874363	0.839808	0.904201	0.920085	0.930086	0.958559	0.971339	0.967906	0.944893	0.993798	0.321425
2	0.542763	0.603938	0.617481	0.632644	0.710263	0.673024	0.814133	0.763524	0.766379	0.818262	0.92062	0.928896	0.966963	0.95593	0.936788	0.991094	0.542351	0.603938	0.678764	0.677949	0.760444	0.685773	0.8385	0.771565	0.806409	0.854009	0.925488	0.93904	0.966921	0.961806	0.940609	0.992139	0.540515	0.603084	0.702805	0.768829	0.845757	0.667508	0.868565	0.830298	0.900832	0.916864	0.923953	0.955585	0.967607	0.965096	0.940552	0.992323	0.313528
3	0.536146	0.597986	0.613044	0.624422	0.702658	0.66448	0.806545	0.755157	0.759622	0.813046	0.916411	0.926731	0.963396	0.953898	0.933097	0.989413	0.535455	0.597986	0.673625	0.671692	0.753516	0.676132	0.832737	0.764679	0.801226	0.849535	0.920607	0.937068	0.964082	0.960045	0.936717	0.990643	0.533434	0.597058	0.698101	0.763824	0.843699	0.658342	0.864646	0.825631	0.898286	0.913652	0.918925	0.953268	0.964245	0.963512	0.936789	0.990994	0.303184
4	0.530711	0.593289	0.607734	0.620186	0.697476	0.654375	0.800208	0.747097	0.754389	0.807803	0.912192	0.924514	0.960927	0.951097	0.929097	0.987903	0.531364	0.593289	0.670217	0.666082	0.749143	0.667327	0.82678	0.757328	0.797015	0.845119	0.917912	0.935125	0.961225	0.957578	0.932941	0.98942	0.52967	0.592796	0.694749	0.759589	0.841333	0.649485	0.861523	0.821484	0.895304	0.910264	0.915952	0.950982	0.961541	0.961517	0.932673	0.990175	0.297047
5	0.526785	0.588925	0.604158	0.616145	0.693105	0.644902	0.795113	0.740213	0.750148	0.803149	0.907752	0.922046	0.957759	0.948073	0.925822	0.986547	0.526615	0.588926	0.66622	0.660928	0.744785	0.661382	0.821546	0.750921	0.793025	0.841759	0.913416	0.933062	0.958521	0.954927	0.929745	0.988402	0.524808	0.588352	0.691621	0.756559	0.839548	0.641487	0.858933	0.817842	0.893383	0.907881	0.911732	0.948476	0.958621	0.960065	0.930137	0.989387	0.289923
6	0.522271	0.585266	0.601446	0.612234	0.689401	0.640286	0.790573	0.735141	0.745463	0.79927	0.904152	0.920178	0.9556	0.945583	0.922473	0.985848	0.52202	0.585266	0.66316	0.657973	0.741627	0.653866	0.81867	0.746255	0.790023	0.837587	0.910046	0.931298	0.956348	0.952831	0.926456	0.987757	0.520933	0.584553	0.688815	0.754313	0.838199	0.63673	0.856032	0.813631	0.891577	0.906165	0.90821	0.946378	0.956746	0.958445	0.926626	0.988421	0.283032
7	0.518418	0.581809	0.598094	0.608617	0.684514	0.634808	0.786834	0.729395	0.742237	0.796171	0.900496	0.917802	0.953608	0.943874	0.919574	0.984975	0.518133	0.581809	0.660109	0.654229	0.73842	0.649666	0.815104	0.741355	0.787243	0.835575	0.906536	0.929178	0.95402	0.951355	0.923492	0.986894	0.517003	0.581049	0.686129	0.751656	0.836075	0.629818	0.853927	0.809234	0.889814	0.904167	0.904877	0.945421	0.954469	0.956955	0.923873	0.987633	0.2772
8	0.515101	0.57852	0.594716	0.60461	0.680954	0.630361	0.782808	0.724638	0.739421	0.793835	0.897199	0.915967	0.950562	0.941603	0.916462	0.984123	0.514738	0.57852	0.65757	0.651658	0.735751	0.646488	0.812627	0.737738	0.7848	0.833626	0.903672	0.927607	0.951312	0.949389	0.920144	0.98611	0.513717	0.577823	0.68358	0.750228	0.8346	0.625922	0.851932	0.807305	0.887776	0.902688	0.90178	0.944087	0.952259	0.955245	0.921119	0.986842	0.272108
9	0.511842	0.575114	0.591873	0.601323	0.678031	0.626495	0.779618	0.719794	0.735956	0.791416	0.89513	0.914611	0.948191	0.939865	0.914322	0.983055	0.51227	0.575114	0.655296	0.649537	0.733056	0.642501	0.810112	0.73266	0.782099	0.830968	0.901698	0.926316	0.948987	0.947877	0.918152	0.985279	0.511156	0.574612	0.681502	0.748673	0.83346	0.621645	0.849646	0.804573	0.88655	0.901148	0.899599	0.94252	0.950183	0.953782	0.918828	0.986033	0.268406
10	0.509422	0.571611	0.588736	0.598345	0.675886	0.622277	0.776649	0.715692	0.733118	0.789396	0.892913	0.91271	0.945755	0.938128	0.911239	0.982069	0.509086	0.571611	0.653334	0.647189	0.730953	0.639148	0.80716	0.729161	0.780144	0.828575	0.899522	0.924806	0.946745	0.946351	0.91542	0.984395	0.508236	0.571155	0.679566	0.746639	0.832465	0.61662	0.847974	0.801707	0.885485	0.899893	0.897312	0.94153	0.948063	0.952064	0.916815	0.985547	0.26363
11	0.507317	0.569388	0.586611	0.595053	0.673255	0.618607	0.774529	0.712788	0.73049	0.787376	0.890739	0.910961	0.943882	0.936343	0.909016	0.981363	0.50649	0.569388	0.651926	0.645374	0.728694	0.634584	0.804549	0.726032	0.777752	0.826927	0.896878	0.923017	0.945136	0.944802	0.913406	0.98378	0.505862	0.56885	0.678175	0.744728	0.831487	0.613007	0.846368	0.799598	0.88412	0.898274	0.895036	0.940418	0.946069	0.950815	0.91407	0.984899	0.259736
12	0.505388	0.566948	0.584273	0.593201	0.669424	0.615745	0.772319	0.708916	0.728373	0.785312	0.888631	0.909538	0.941913	0.934622	0.90675	0.980724	0.504144	0.566948	0.649849	0.643349	0.726859	0.631036	0.802129	0.722706	0.775817	0.824694	0.89495	0.921998	0.943073	0.943278	0.911474	0.983197	0.503524	0.56598	0.675968	0.743058	0.830282	0.609358	0.844521	0.797262	0.883108	0.897307	0.893161	0.939192	0.944277	0.949451	0.91229	0.984213	0.256217
13	0.503418	0.563606	0.582398	0.591214	0.666264	0.611404	0.770259	0.705415	0.725997	0.782796	0.886677	0.908517	0.940673	0.933191	0.90434	0.980015	0.502192	0.563606	0.647108	0.641412	0.724615	0.627231	0.800352	0.719033	0.773817	0.822702	0.893558	0.921118	0.94162	0.942088	0.909369	0.982641	0.501497	0.562736	0.672876	0.741392	0.829322	0.606075	0.842773	0.794825	0.881953	0.896008	0.891887	0.938213	0.942925	0.948349	0.910269	0.983645	0.253288
14	0.501225	0.561344	0.580285	0.58924	0.664187	0.608355	0.768193	0.702291	0.723845	0.780547	0.88462	0.907492	0.939173	0.931973	0.902508	0.979467	0.500136	0.561344	0.644752	0.63943	0.722337	0.624943	0.79844	0.715834	0.771889	0.820422	0.891182	0.919974	0.940159	0.940916	0.907332	0.982183	0.499182	0.560708	0.670682	0.739442	0.828367	0.603573	0.841382	0.793175	0.880894	0.894785	0.889741	0.937542	0.941379	0.947266	0.908479	0.982996	0.250205
15	0.499523	0.559287	0.577446	0.587207	0.662233	0.605589	0.766317	0.699623	0.722268	0.778818	0.882604	0.906126	0.937368	0.930602	0.900551	0.978769	0.498082	0.559287	0.642604	0.637162	0.719962	0.621927	0.796482	0.712903	0.769989	0.818591	0.889565	0.918803	0.938828	0.939689	0.905776	0.981517	0.497227	0.558447	0.668892	0.737278	0.827411	0.600122	0.839817	0.791467	0.880134	0.893751	0.887668	0.936682	0.939897	0.945854	0.907584	0.982459	0.247123
16	0.497808	0.555952	0.575483	0.584639	0.660566	0.603027	0.764218	0.696801	0.719638	0.777125	0.880924	0.904939	0.935763	0.929275	0.899077	0.978181	0.496397	0.555952	0.64023	0.634967	0.718454	0.618882	0.795113	0.710524	0.768444	0.817334	0.887542	0.917866	0.937559	0.938579	0.904386	0.980969	0.49558	0.555127	0.666931	0.735869	0.826455	0.597215	0.838672	0.790075	0.879395	0.892858	0.885744	0.935538	0.938857	0.944878	0.905901	0.982025	0.244596
17	0.495776	0.553322	0.57386	0.582633	0.659041	0.600899	0.761676	0.693327	0.71679	0.775378	0.878889	0.903693	0.934411	0.92815	0.897699	0.977647	0.495101	0.553322	0.639389	0.633423	0.717357	0.61634	0.793391	0.708673	0.766818	0.816129	0.885702	0.916723	0.936095	0.937678	0.903169	0.980439	0.494258	0.552552	0.664445	0.734211	0.825393	0.594962	0.837485	0.788703	0.878571	0.891415	0.883852	0.934485	0.937529	0.943836	0.904475	0.981485	0.242653
18	0.493597	0.551357	0.572164	0.581019	0.656811	0.597971	0.759535	0.690114	0.715016	0.773114	0.876509	0.90232	0.933029	0.926902	0.896187	0.976993	0.493232	0.551357	0.637442	0.631449	0.716033	0.61381	0.790782	0.706295	0.765222	0.814541	0.883478	0.915575	0.934894	0.936474	0.901512	0.979997	0.492404	0.550403	0.662508	0.732877	0.824443	0.592016	0.835938	0.787251	0.877769	0.890222	0.881698	0.93373	0.936415	0.942708	0.902556	0.980987	0.239848
19	0.491414	0.549918	0.570376	0.579323	0.654905	0.595155	0.757502	0.688001	0.713516	0.771898	0.874279	0.901327	0.932035	0.925546	0.895151	0.976507	0.491535	0.549918	0.6355	0.630008	0.714701	0.610916	0.789435	0.704114	0.763522	0.813026	0.881614	0.914898	0.933687	0.935135	0.900295	0.97961	0.490666	0.549213	0.660875	0.731504	0.823573	0.589468	0.834748	0.78619	0.877099	0.88924	0.880071	0.93287	0.935162	0.941656	0.900938	0.980512	0.237303
20	0.489198	0.547539	0.568969	0.577001	0.65345	0.592706	0.755191	0.685668	0.711689	0.77018	0.872533	0.900484	0.930959	0.92439	0.893548	0.976068	0.490428	0.547539	0.634275	0.628219	0.713712	0.608254	0.787551	0.701763	0.762154	0.811711	0.879892	0.914153	0.93247	0.934363	0.898726	0.979169	0.489451	0.546996	0.659432	0.730705	0.822674	0.586704	0.833554	0.784606	0.876413	0.888338	0.878369	0.931958	0.933946	0.940678	0.899749	0.980143	0.235642
21	0.487739	0.54598	0.567481	0.57513	0.651691	0.590496	0.753607	0.683794	0.709968	0.768152	0.871211	0.899852	0.929531	0.923634	0.891958	0.975577	0.488834	0.54598	0.632985	0.626802	0.7123	0.606433	0.786141	0.699706	0.760671	0.810595	0.878223	0.913587	0.930926	0.933595	0.897233	0.97874	0.487894	0.545241	0.657935	0.729387	0.821973	0.584238	0.832564	0.783255	0.875421	0.887318	0.876335	0.931306	0.932698	0.939768	0.898473	0.979636	0.233251
22	0.486227	0.544563	0.566267	0.573529	0.650056	0.588761	0.751338	0.681519	0.707744	0.766281	0.869649	0.899012	0.928367	0.922578	0.890686	0.97496	0.486815	0.544563	0.63164	0.625699	0.710449	0.604646	0.784943	0.697731	0.75933	0.809131	0.876956	0.912833	0.929789	0.932407	0.895754	0.978226	0.485883	0.543733	0.656238	0.728168	0.821389	0.582181	0.83137	0.781692	0.874448	0.886186	0.874934	0.930639	0.931641	0.938788	0.896988	0.979258	0.230265
23	0.484652	0.542948	0.565045	0.572327	0.648888	0.586909	0.749936	0.679391	0.706199	0.764748	0.867668	0.898365	0.926968	0.921101	0.889172	0.974399	0.485083	0.542948	0.629236	0.624316	0.709295	0.602938	0.782928	0.696053	0.758087	0.807757	0.875499	0.912142	0.928289	0.93148	0.894208	0.977724	0.484133	0.542111	0.655031	0.726773	0.820724	0.5805	0.830401	0.780294	0.873735	0.88547	0.873682	0.929954	0.930594	0.938016	0.895671	0.978829	0.227629
24	0.483042	0.541544	0.563401	0.57099	0.647646	0.584661	0.747558	0.676865	0.705218	0.763368	0.866541	0.89758	0.925845	0.92026	0.887799	0.974031	0.483836	0.541544	0.627986	0.62312	0.708176	0.601373	0.781507	0.694336	0.756963	0.806723	0.874361	0.911528	0.927317	0.930787	0.893082	0.977342	0.482733	0.540686	0.653762	0.725563	0.820122	0.57849	0.829091	0.779031	0.873121	0.884678	0.87203	0.929289	0.929604	0.937127	0.894371	0.978459	0.225763
25	0.481832	0.5399	0.562134	0.569295	0.646636	0.582744	0.745759	0.674744	0.703818	0.762271	0.865304	0.896906	0.924711	0.919223	0.886781	0.973538	0.482706	0.5399	0.626791	0.621314	0.707014	0.599634	0.779974	0.692022	0.755301	0.805611	0.873111	0.910987	0.926547	0.929873	0.892056	0.976966	0.481291	0.539176	0.652667	0.724691	0.819517	0.576959	0.827841	0.778164	0.872452	0.883915	0.870813	0.928844	0.928779	0.936209	0.893293	0.978029	0.224063
26	0.480342	0.538453	0.560728	0.567527	0.645448	0.580975	0.744445	0.672527	0.702456	0.760932	0.863966	0.896238	0.923462	0.918099	0.885068	0.972858	0.48144	0.538453	0.625337	0.619694	0.705897	0.598067	0.77841	0.690248	0.754217	0.804572	0.871539	0.910182	0.925641	0.928797	0.890992	0.976436	0.4798	0.537774	0.651341	0.723641	0.818935	0.575172	0.826736	0.776555	0.871927	0.883163	0.868977	0.928184	0.927972	0.935343	0.89174	0.977606	0.222192
27	0.479186	0.536759	0.559401	0.56606	0.644276	0.579166	0.743175	0.670389	0.701372	0.759793	0.862456	0.895308	0.922701	0.917382	0.884186	0.972433	0.479671	0.536759	0.623806	0.618048	0.704687	0.596353	0.776986	0.688569	0.752892	0.803224	0.870162	0.909151	0.924836	0.928169	0.889827	0.975963	0.478258	0.535971	0.650113	0.722599	0.818344	0.573144	0.825836	0.775125	0.871264	0.882284	0.867678	0.927628	0.926928	0.934519	0.889946	0.977176	0.219565
28	0.47792	0.534955	0.558126	0.564833	0.643038	0.577605	0.741625	0.668811	0.699716	0.75855	0.86093	0.894437	0.921854	0.916466	0.882976	0.972014	0.478294	0.534955	0.622934	0.617149	0.70366	0.594361	0.775663	0.68698	0.751615	0.802232	0.868828	0.908616	0.923918	0.927302	0.888564	0.975575	0.476823	0.53414	0.649149	0.721745	0.817863	0.571035	0.824697	0.774268	0.870624	0.881492	0.865801	0.927081	0.926177	0.933245	0.888887	0.976713	0.217492
29	0.476959	0.533654	0.557054	0.563536	0.641828	0.576006	0.739834	0.666928	0.698273	0.757277	0.859895	0.893557	0.920912	0.915424	0.881764	0.97161	0.476937	0.533654	0.621787	0.616009	0.70272	0.592064	0.774366	0.685482	0.750686	0.801063	0.867889	0.907955	0.922915	0.926388	0.887015	0.975158	0.475458	0.532778	0.64796	0.720751	0.8173	0.569405	0.823695	0.773227	0.869938	0.880444	0.864807	0.926521	0.925361	0.932479	0.887495	0.976322	0.215529
30	0.475762	0.532374	0.55583	0.562417	0.640557	0.5745	0.738598	0.664626	0.697323	0.755897	0.858786	0.892824	0.919953	0.914635	0.880894	0.97116	0.47584	0.532374	0.620711	0.615275	0.701868	0.590039	0.772942	0.683293	0.749517	0.799875	0.866559	0.907337	0.922132	0.925584	0.886285	0.974719	0.474306	0.531437	0.646965	0.71996	0.816793	0.568143	0.822642	0.772138	0.869414	0.879653	0.863449	0.926121	0.924368	0.931586	0.886474	0.975987	0.213888
31	0.474361	0.53132	0.554531	0.561271	0.639297	0.573065	0.736737	0.662814	0.695902	0.754942	0.857354	0.892134	0.919048	0.913602	0.879914	0.970616	0.474639	0.53132	0.619185	0.614365	0.70078	0.588761	0.771597	0.681107	0.74861	0.798782	0.865102	0.906769	0.921594	0.924608	0.885265	0.974182	0.473031	0.530285	0.646186	0.7193	0.816411	0.566369	0.821362	0.770937	0.868832	0.878698	0.862056	0.925472	0.923597	0.930573	0.885134	0.975672	0.212055
32	0.473258	0.529803	0.553287	0.559724	0.638304	0.571155	0.735298	0.661169	0.694552	0.753443	0.856021	0.891445	0.918375	0.912484	0.878977	0.970043	0.473466	0.529803	0.618302	0.613311	0.700028	0.587485	0.770503	0.679425	0.747508	0.797734	0.863331	0.905983	0.920663	0.92356	0.884384	0.973796	0.471845	0.528723	0.645181	0.718262	0.815865	0.564528	0.820456	0.770137	0.868342	0.877772	0.860825	0.924889	0.922487	0.929968	0.884058	0.975272	0.210235
33	0.472153	0.528601	0.552024	0.558845	0.6369	0.569959	0.733754	0.659171	0.693242	0.752008	0.854538	0.890929	0.91766	0.911551	0.877863	0.969513	0.472137	0.528601	0.617321	0.612557	0.699081	0.586162	0.769018	0.677937	0.746678	0.796849	0.862212	0.905373	0.919958	0.922923	0.883135	0.973426	0.470496	0.527509	0.644454	0.717293	0.815291	0.562898	0.819506	0.769367	0.867659	0.877119	0.859556	0.924399	0.921652	0.929073	0.88258	0.974834	0.208275
34	0.471252	0.527279	0.551073	0.557698	0.635848	0.568444	0.731891	0.65762	0.691945	0.75125	0.853274	0.890267	0.916804	0.910677	0.876599	0.969084	0.470962	0.527279	0.616383	0.611275	0.698373	0.585216	0.767969	0.676558	0.745624	0.795677	0.861211	0.904677	0.918942	0.922209	0.882262	0.97305	0.469049	0.526364	0.643537	0.71635	0.8147	0.561015	0.818541	0.76827	0.86717	0.876501	0.858024	0.923895	0.920997	0.928351	0.881478	0.974417	0.206528
35	0.469941	0.526203	0.550026	0.556878	0.63475	0.567232	0.730492	0.655877	0.690607	0.749933	0.851895	0.889623	0.915973	0.909939	0.875427	0.968619	0.469683	0.526203	0.61561	0.610244	0.697385	0.583871	0.766327	0.675276	0.744884	0.795012	0.860315	0.904034	0.918022	0.921523	0.881198	0.972693	0.467946	0.525284	0.64245	0.715611	0.814136	0.559213	0.817819	0.767323	0.866619	0.875888	0.857163	0.923413	0.920105	0.927517	0.880539	0.974079	0.204631
36	0.468858	0.525145	0.548896	0.555844	0.633796	0.565561	0.729198	0.654677	0.689714	0.748996	0.850809	0.888953	0.915218	0.909093	0.87424	0.968144	0.468315	0.525145	0.614799	0.609045	0.696382	0.582403	0.765035	0.673843	0.744097	0.793997	0.859178	0.903544	0.917279	0.920677	0.880402	0.972377	0.466714	0.524347	0.641552	0.715002	0.813601	0.557311	0.816988	0.766628	0.866162	0.875131	0.856181	0.922996	0.919116	0.92684	0.879505	0.973637	0.202598
37	0.467619	0.524145	0.547974	0.554611	0.632528	0.564188	0.727783	0.653473	0.688439	0.74806	0.849786	0.888308	0.914474	0.908272	0.873397	0.967762	0.467462	0.524145	0.613901	0.608129	0.69543	0.580648	0.763965	0.672355	0.743259	0.793026	0.858142	0.902878	0.916512	0.919919	0.879423	0.97208	0.465836	0.523112	0.640773	0.714283	0.812987	0.555948	0.81589	0.765779	0.865642	0.874369	0.855198	0.922452	0.918476	0.925955	0.878205	0.9733	0.201257
38	0.46668	0.523135	0.547042	0.553569	0.631612	0.562409	0.726579	0.652427	0.687344	0.74713	0.849014	0.887455	0.913638	0.907524	0.872427	0.967384	0.466644	0.523135	0.613032	0.607037	0.694539	0.579104	0.762943	0.671016	0.741998	0.791821	0.857133	0.902375	0.915519	0.919259	0.878323	0.971658	0.465046	0.522115	0.640064	0.713372	0.81253	0.554914	0.815318	0.764893	0.865191	0.87357	0.854136	0.922052	0.917715	0.925282	0.877249	0.972961	0.199992
39	0.465702	0.521978	0.545901	0.552424	0.630709	0.561059	0.725253	0.650755	0.686355	0.746254	0.847951	0.88687	0.912651	0.906814	0.871479	0.967066	0.465179	0.521978	0.61205	0.606059	0.693711	0.577768	0.762134	0.669414	0.741077	0.791055	0.856155	0.901778	0.91472	0.918399	0.8773	0.971221	0.463552	0.520784	0.639073	0.712515	0.812012	0.552984	0.814634	0.763633	0.864643	0.873081	0.852986	0.921611	0.917024	0.924617	0.876229	0.97258	0.197788
40	0.464755	0.520838	0.545163	0.551309	0.629853	0.559436	0.723664	0.649059	0.685563	0.745232	0.84708	0.886337	0.911758	0.905821	0.870725	0.966532	0.464125	0.520838	0.611309	0.60503	0.692924	0.576669	0.761027	0.667908	0.740092	0.790026	0.855015	0.901228	0.9139	0.917669	0.876325	0.97084	0.462445	0.519723	0.638417	0.711786	0.811537	0.551555	0.813857	0.76273	0.864171	0.872327	0.851757	0.921304	0.916051	0.923938	0.875187	0.972275	0.196204
41	0.463739	0.520096	0.544572	0.55014	0.628945	0.558479	0.722524	0.647753	0.684482	0.744084	0.8459	0.885633	0.910904	0.904786	0.869753	0.966144	0.463287	0.520096	0.610756	0.604127	0.692167	0.575245	0.760044	0.666469	0.739158	0.789104	0.854102	0.900743	0.913129	0.916804	0.875209	0.970401	0.461412	0.518863	0.637727	0.711051	0.811004	0.550482	0.81301	0.761776	0.863719	0.871885	0.850987	0.92097	0.91507	0.923147	0.874298	0.971948	0.194959
42	0.462699	0.519048	0.543748	0.548969	0.628037	0.557178	0.721174	0.646494	0.683506	0.743096	0.844873	0.884946	0.910158	0.903831	0.86877	0.96571	0.462459	0.519048	0.610093	0.603244	0.691327	0.574036	0.759222	0.665284	0.738406	0.788028	0.853147	0.900123	0.912399	0.915999	0.874498	0.969961	0.460528	0.517923	0.636901	0.710391	0.810483	0.548932	0.812251	0.760867	0.863371	0.871235	0.849993	0.920307	0.914447	0.922357	0.873082	0.971585	0.193726
43	0.461874	0.51788	0.543099	0.548144	0.627155	0.555962	0.720138	0.645117	0.682646	0.742185	0.843385	0.884326	0.909523	0.902884	0.867922	0.965348	0.461551	0.51788	0.609182	0.602143	0.690708	0.572862	0.758206	0.664089	0.737865	0.787022	0.852287	0.899677	0.91169	0.915276	0.873541	0.969635	0.459562	0.517055	0.635982	0.709846	0.810083	0.547299	0.811475	0.760093	0.862842	0.870623	0.848951	0.919887	0.913705	0.921741	0.872092	0.971237	0.192554
44	0.460974	0.517114	0.542374	0.547173	0.625979	0.554677	0.719076	0.643201	0.681568	0.741361	0.842366	0.883721	0.908794	0.902113	0.866831	0.964861	0.460736	0.517114	0.6083	0.601035	0.68993	0.571807	0.757412	0.662374	0.736902	0.786115	0.851565	0.899284	0.910903	0.914563	0.872481	0.969366	0.458728	0.51627	0.635226	0.709341	0.809575	0.54588	0.810517	0.759166	0.862285	0.870063	0.848108	0.919316	0.912779	0.921312	0.871178	0.970936	0.191222
45	0.460163	0.516383	0.541513	0.546226	0.625427	0.553711	0.717663	0.641932	0.680518	0.740122	0.841652	0.883231	0.907988	0.901335	0.865856	0.964475	0.45979	0.516383	0.607607	0.600357	0.689255	0.570575	0.756554	0.661123	0.73618	0.785412	0.850596	0.898777	0.91016	0.913862	0.87177	0.969039	0.457842	0.515377	0.634315	0.70856	0.808931	0.544337	0.809539	0.758428	0.861804	0.869317	0.84688	0.918863	0.912023	0.920447	0.870568	0.970635	0.189707
46	0.459143	0.51562	0.540552	0.545271	0.624508	0.552656	0.716722	0.640829	0.679741	0.739253	0.840941	0.882662	0.907126	0.900622	0.865201	0.963995	0.458859	0.51562	0.606981	0.599486	0.688463	0.569603	0.755285	0.660148	0.735412	0.784578	0.849691	0.898162	0.909467	0.913373	0.870731	0.968678	0.457038	0.514547	0.633647	0.708009	0.808562	0.542681	0.808732	0.757671	0.861264	0.868804	0.845771	0.918481	0.911055	0.91984	0.869575	0.970306	0.188421
47	0.458287	0.514509	0.539836	0.544449	0.623597	0.55109	0.715892	0.639442	0.678621	0.738254	0.839991	0.882115	0.90647	0.899776	0.864465	0.963702	0.457705	0.514509	0.605979	0.598754	0.687714	0.568463	0.754027	0.659002	0.734594	0.783704	0.848888	0.897625	0.908974	0.912677	0.869848	0.968472	0.455766	0.513379	0.632994	0.70724	0.808041	0.541421	0.808139	0.756767	0.860918	0.868219	0.84473	0.918027	0.910215	0.919164	0.86867	0.970046	0.186691
48	0.457526	0.513552	0.5389	0.543363	0.62281	0.549985	0.714964	0.638337	0.677731	0.737091	0.839197	0.881594	0.905696	0.899074	0.86364	0.963334	0.456959	0.513552	0.605335	0.597933	0.686976	0.567188	0.753382	0.658012	0.733903	0.782941	0.848029	0.897096	0.908309	0.912046	0.868841	0.968165	0.454766	0.512519	0.632213	0.706558	0.807772	0.540183	0.80719	0.756169	0.860419	0.867493	0.843443	0.917582	0.909615	0.918503	0.867731	0.969737	0.185467
49	0.456517	0.512637	0.537792	0.542422	0.622033	0.548621	0.71372	0.637036	0.676784	0.736221	0.838344	0.88107	0.905075	0.898597	0.862873	0.962941	0.456204	0.512637	0.604521	0.597327	0.686301	0.566284	0.752029	0.656939	0.733185	0.782056	0.847247	0.896708	0.907516	0.911292	0.867964	0.967726	0.453849	0.511724	0.631124	0.705769	0.80731	0.538862	0.806375	0.75539	0.860013	0.866666	0.842463	0.91711	0.908901	0.917704	0.866965	0.969379	0.184366
50	0.455802	0.511782	0.537148	0.541525	0.621238	0.547478	0.712983	0.63594	0.675867	0.735261	0.837348	0.880511	0.904364	0.897534	0.861996	0.962615	0.455447	0.511782	0.603966	0.596674	0.685446	0.56519	0.75117	0.655988	0.732387	0.781369	0.846234	0.896162	0.906733	0.910531	0.867358	0.96739	0.452976	0.510838	0.630278	0.705041	0.806966	0.53755	0.805617	0.754542	0.859583	0.866185	0.841339	0.916627	0.9081	0.916988	0.866364	0.968995	0.183217
51	0.454933	0.510993	0.536387	0.540718	0.62039	0.546174	0.711958	0.634906	0.675033	0.734352	0.836457	0.879993	0.903583	0.896707	0.861119	0.962212	0.454296	0.510993	0.603159	0.596048	0.685006	0.564045	0.750374	0.654858	0.731501	0.780569	0.84526	0.895685	0.906048	0.909871	0.866557	0.967127	0.452025	0.51011	0.629582	0.704421	0.80653	0.53683	0.804864	0.753863	0.859106	0.86569	0.840519	0.916128	0.907267	0.916458	0.865692	0.968669	0.181607
52	0.453924	0.510074	0.535716	0.539735	0.619514	0.545318	0.710912	0.633667	0.674019	0.733466	0.835282	0.879373	0.902985	0.895976	0.860347	0.961894	0.453646	0.510074	0.602151	0.595308	0.68408	0.56294	0.749311	0.653849	0.730662	0.779905	0.84416	0.895137	0.905455	0.909314	0.86586	0.966837	0.451102	0.509053	0.628846	0.703808	0.806106	0.535734	0.804235	0.753172	0.858821	0.865076	0.839751	0.915608	0.906432	0.915793	0.864602	0.968342	0.180627
53	0.453178	0.509026	0.535039	0.538897	0.618715	0.544422	0.709944	0.632598	0.673191	0.732513	0.834323	0.878958	0.902333	0.895436	0.859469	0.961503	0.452596	0.509026	0.601375	0.594535	0.68355	0.561597	0.748606	0.652895	0.72999	0.779276	0.843261	0.894514	0.904632	0.908697	0.865259	0.966613	0.450068	0.508052	0.628304	0.703239	0.805618	0.534435	0.803656	0.752599	0.85849	0.864545	0.838771	0.915253	0.905675	0.915201	0.863551	0.968075	0.179018
54	0.452204	0.508299	0.534473	0.538097	0.618001	0.543341	0.709026	0.631621	0.672557	0.731744	0.833279	0.878333	0.90183	0.894852	0.858787	0.961216	0.451886	0.508299	0.600471	0.593835	0.682959	0.560632	0.747656	0.651806	0.729051	0.778515	0.842223	0.894019	0.904014	0.908166	0.864355	0.966334	0.449361	0.507223	0.627761	0.702582	0.805158	0.533133	0.803047	0.752128	0.858118	0.863864	0.837897	0.914642	0.905008	0.914576	0.86255	0.967777	0.177882
55	0.451563	0.50753	0.533613	0.537343	0.617215	0.542335	0.708017	0.630307	0.671677	0.730611	0.832255	0.877569	0.900986	0.894136	0.858063	0.960953	0.450694	0.50753	0.599764	0.593203	0.682411	0.559791	0.7468	0.650947	0.728336	0.777799	0.841297	0.893574	0.903198	0.907607	0.863665	0.96602	0.448302	0.506174	0.627086	0.701846	0.804708	0.532294	0.802393	0.751398	0.857722	0.863115	0.83711	0.91413	0.90438	0.913908	0.862032	0.967449	0.176193
56	0.450784	0.506601	0.532558	0.536518	0.616656	0.541102	0.707213	0.629378	0.670893	0.729724	0.831471	0.877106	0.900124	0.893484	0.857341	0.960708	0.449678	0.506601	0.59917	0.592493	0.681642	0.558938	0.745753	0.649768	0.72781	0.777153	0.840601	0.893158	0.902462	0.907097	0.863027	0.965765	0.447304	0.505121	0.626342	0.701238	0.80429	0.530984	0.801576	0.750832	0.857305	0.862478	0.836281	0.913552	0.903732	0.913295	0.861122	0.967132	0.174661
57	0.450178	0.505676	0.531801	0.535807	0.615964	0.539702	0.706284	0.628312	0.670089	0.728798	0.830518	0.87651	0.899456	0.892985	0.856428	0.960356	0.44888	0.505676	0.598605	0.591781	0.680821	0.557668	0.74495	0.648656	0.726917	0.776548	0.839515	0.89263	0.901929	0.90656	0.862393	0.965443	0.446486	0.504342	0.62579	0.700684	0.803855	0.529866	0.80098	0.750433	0.856975	0.861667	0.835538	0.913085	0.9031	0.912792	0.860344	0.966791	0.173466
58	0.449385	0.504865	0.531072	0.534946	0.615179	0.538327	0.705036	0.626965	0.669343	0.728111	0.829572	0.876131	0.898743	0.892388	0.855552	0.959982	0.448056	0.504865	0.598044	0.591231	0.680228	0.556596	0.743896	0.647805	0.726279	0.775492	0.83869	0.892077	0.901355	0.90602	0.861407	0.965059	0.445673	0.503565	0.625325	0.70015	0.803562	0.528748	0.800166	0.749913	0.856637	0.861153	0.834676	0.912727	0.902431	0.912295	0.859409	0.966586	0.17222
59	0.448732	0.504137	0.530335	0.534148	0.614419	0.537407	0.703857	0.626117	0.668569	0.727393	0.828826	0.875566	0.898024	0.89179	0.854873	0.959591	0.447253	0.504137	0.597328	0.590643	0.679757	0.555647	0.743031	0.646748	0.725492	0.774966	0.838074	0.89175	0.90068	0.905474	0.860648	0.964682	0.444866	0.502441	0.624758	0.699371	0.803175	0.527823	0.799449	0.749155	0.856309	0.860539	0.833959	0.912304	0.901776	0.911889	0.858566	0.96625	0.170953
60	0.447927	0.502958	0.529898	0.533262	0.613788	0.536464	0.702853	0.625026	0.668008	0.726653	0.828029	0.87502	0.897322	0.8912	0.854211	0.959207	0.446476	0.502958	0.596743	0.589747	0.679286	0.554668	0.742374	0.645833	0.724788	0.774469	0.837453	0.891276	0.89991	0.904871	0.859768	0.964318	0.443986	0.501309	0.624092	0.698814	0.802731	0.526826	0.79874	0.748538	0.855996	0.860126	0.833027	0.911727	0.90115	0.911435	0.857373	0.966073	0.169799
61	0.446923	0.501839	0.529276	0.532516	0.613115	0.535568	0.70208	0.624122	0.667279	0.726123	0.827306	0.874605	0.896621	0.890639	0.853494	0.958828	0.445604	0.501839	0.59609	0.589072	0.67862	0.553906	0.741287	0.644867	0.723974	0.77361	0.836826	0.89078	0.899324	0.90451	0.859184	0.964035	0.443345	0.500187	0.623258	0.698254	0.802343	0.525739	0.798148	0.747624	0.855668	0.859796	0.832066	0.9113	0.900516	0.910948	0.856631	0.965767	0.168457
62	0.446059	0.501096	0.52873	0.531926	0.612427	0.534628	0.701156	0.623266	0.6664	0.725368	0.826546	0.874017	0.896016	0.889975	0.852811	0.958467	0.444719	0.501096	0.595319	0.58836	0.678155	0.552505	0.740643	0.643956	0.723384	0.77286	0.836039	0.890433	0.89871	0.903938	0.858564	0.963739	0.442489	0.499482	0.62249	0.697643	0.802031	0.524884	0.797443	0.747223	0.855386	0.859265	0.83137	0.910752	0.899899	0.910308	0.85592	0.96554	0.167152
63	0.445395	0.500323	0.528059	0.531212	0.611847	0.533711	0.700135	0.621811	0.665668	0.72459	0.825824	0.87343	0.895298	0.889527	0.852042	0.958147	0.443983	0.500323	0.594752	0.587839	0.677552	0.551492	0.739987	0.642741	0.722738	0.772217	0.835296	0.889998	0.897979	0.903436	0.857713	0.963486	0.441744	0.498844	0.62181	0.697068	0.801637	0.523898	0.796699	0.746557	0.854972	0.858771	0.830573	0.910347	0.899182	0.909805	0.854938	0.965244	0.16606
64	0.444653	0.499637	0.527337	0.530544	0.611254	0.53272	0.698914	0.620754	0.665007	0.72398	0.824982	0.872954	0.894684	0.88898	0.851287	0.957837	0.44323	0.499637	0.59407	0.587197	0.676993	0.550648	0.739279	0.641825	0.722123	0.771609	0.834414	0.889649	0.897385	0.902779	0.857196	0.963111	0.441054	0.497887	0.621238	0.696572	0.801282	0.522951	0.795986	0.745907	0.854687	0.858256	0.829669	0.90989	0.898351	0.909439	0.854041	0.964936	0.164969
65	0.443822	0.498894	0.52674	0.53002	0.610533	0.531955	0.697978	0.619741	0.664061	0.723392	0.824197	0.87257	0.893966	0.888363	0.850746	0.957606	0.442251	0.498894	0.593462	0.586623	0.676358	0.549772	0.73849	0.640962	0.721558	0.771019	0.833518	0.889241	0.896644	0.902147	0.856542	0.962901	0.440061	0.496876	0.62059	0.696047	0.800941	0.521932	0.795128	0.745212	0.854434	0.857788	0.828675	0.90947	0.89766	0.908966	0.853313	0.964615	0.16356
66	0.442864	0.497756	0.526178	0.52925	0.609919	0.531076	0.69719	0.618694	0.663446	0.722619	0.823456	0.87214	0.893341	0.88769	0.850007	0.957237	0.441615	0.497757	0.592945	0.585999	0.67586	0.548956	0.737574	0.640028	0.720995	0.770352	0.832765	0.888889	0.896137	0.901668	0.855775	0.962629	0.43933	0.495701	0.619887	0.695518	0.800689	0.520808	0.794481	0.744647	0.854175	0.857373	0.827859	0.908991	0.89699	0.908414	0.852491	0.964377	0.162584
67	0.44222	0.49645	0.525518	0.528514	0.609308	0.530325	0.696056	0.617612	0.662623	0.721702	0.822689	0.87176	0.892808	0.887053	0.849211	0.956878	0.440924	0.49645	0.59246	0.58533	0.675241	0.548241	0.736875	0.639	0.720441	0.769803	0.832159	0.888517	0.895593	0.901112	0.855157	0.962243	0.438609	0.494726	0.619214	0.69507	0.800417	0.519794	0.793624	0.743963	0.853842	0.85687	0.827094	0.908556	0.896455	0.907732	0.851759	0.963982	0.16154
68	0.441497	0.495544	0.524946	0.527719	0.608692	0.529417	0.695316	0.616724	0.661853	0.72102	0.821941	0.871293	0.891954	0.886467	0.848651	0.956393	0.440271	0.495544	0.591882	0.584869	0.674873	0.547315	0.73576	0.637853	0.719697	0.768985	0.831297	0.888163	0.894933	0.900696	0.854487	0.961962	0.437952	0.493833	0.618655	0.694546	0.800093	0.518735	0.793106	0.743332	0.853464	0.856238	0.826146	0.90817	0.895879	0.907282	0.851092	0.963696	0.160541
69	0.440958	0.494814	0.524119	0.527008	0.607953	0.52833	0.694656	0.615838	0.661094	0.720173	0.821106	0.870873	0.891248	0.88592	0.848145	0.956097	0.439588	0.494814	0.591195	0.584318	0.674172	0.546419	0.735034	0.637028	0.718966	0.768268	0.830751	0.887754	0.894352	0.900241	0.853845	0.961667	0.437115	0.492995	0.61792	0.694084	0.799741	0.517933	0.792348	0.74268	0.853037	0.855769	0.8253	0.907713	0.895194	0.906807	0.850279	0.96335	0.159462
70	0.440281	0.49429	0.52348	0.526354	0.607323	0.527577	0.693882	0.615112	0.660326	0.719596	0.82054	0.870497	0.890622	0.885573	0.847454	0.955723	0.438846	0.49429	0.590606	0.583824	0.673676	0.545434	0.734163	0.636293	0.718353	0.767722	0.82981	0.887469	0.893726	0.89959	0.85315	0.961361	0.436251	0.492263	0.617341	0.693609	0.799331	0.517036	0.791887	0.742199	0.852625	0.855382	0.824287	0.907345	0.894565	0.906268	0.849562	0.963061	0.158349
71	0.439675	0.493377	0.522855	0.525755	0.606643	0.526798	0.692954	0.614371	0.659723	0.718983	0.819922	0.870133	0.89008	0.884869	0.846795	0.95545	0.438013	0.493377	0.58995	0.583144	0.673235	0.544585	0.733312	0.635287	0.717817	0.766891	0.82913	0.887086	0.893215	0.899028	0.852424	0.961041	0.435461	0.49112	0.616751	0.692984	0.798989	0.516087	0.791403	0.741472	0.85231	0.854968	0.823593	0.90684	0.893912	0.905635	0.848642	0.962826	0.157096
72	0.438992	0.492663	0.522305	0.525145	0.60605	0.525925	0.692211	0.613466	0.659156	0.718141	0.819022	0.869835	0.889503	0.884269	0.846127	0.955162	0.437495	0.492663	0.589265	0.58263	0.672661	0.543758	0.732286	0.634545	0.717332	0.766344	0.828439	0.886642	0.892659	0.898576	0.851743	0.960738	0.43485	0.490294	0.616359	0.692596	0.798714	0.515444	0.790585	0.740738	0.851944	0.854412	0.822695	0.906494	0.893036	0.905148	0.848067	0.962528	0.156347
73	0.438453	0.491843	0.521545	0.524398	0.605559	0.525078	0.691089	0.612644	0.658183	0.717399	0.81811	0.869448	0.888906	0.883697	0.845501	0.954802	0.436605	0.491843	0.58873	0.582144	0.671952	0.542731	0.731506	0.633624	0.716693	0.765813	0.827778	0.88616	0.892091	0.898126	0.85111	0.960454	0.434002	0.489527	0.615863	0.691999	0.7984	0.514878	0.789935	0.740167	0.851615	0.853947	0.822016	0.905967	0.892286	0.904574	0.84706	0.962216	0.155077
74	0.437882	0.490846	0.520853	0.523832	0.604786	0.524336	0.690198	0.611918	0.657517	0.71669	0.817532	0.869001	0.888395	0.883034	0.844883	0.954442	0.43583	0.490846	0.588156	0.581322	0.671592	0.542062	0.730865	0.632587	0.716295	0.765154	0.826892	0.885848	0.891482	0.897647	0.85035	0.96001	0.433327	0.488474	0.615384	0.691475	0.79812	0.514012	0.789239	0.73961	0.851249	0.853517	0.821091	0.905636	0.891827	0.904239	0.846382	0.961937	0.153902
75	0.437064	0.490168	0.520334	0.523253	0.604233	0.523569	0.689328	0.611226	0.656911	0.716193	0.816746	0.868527	0.887752	0.882473	0.844188	0.954098	0.435187	0.490168	0.587441	0.580674	0.671132	0.541174	0.729973	0.631533	0.715793	0.764568	0.826351	0.88545	0.890752	0.897118	0.849854	0.959692	0.432597	0.48793	0.614904	0.691002	0.797864	0.513167	0.788705	0.738989	0.850981	0.852884	0.820357	0.905265	0.891223	0.903673	0.845608	0.96168	0.152914
76	0.436371	0.489416	0.519739	0.522599	0.60359	0.522823	0.688631	0.610229	0.6561	0.715537	0.816034	0.868124	0.887126	0.881984	0.843526	0.953749	0.434649	0.489416	0.5869	0.579947	0.670661	0.540438	0.72941	0.630858	0.715301	0.763925	0.825663	0.885129	0.89002	0.89661	0.849097	0.959468	0.431997	0.487138	0.614431	0.690619	0.797561	0.51189	0.788046	0.738358	0.850641	0.852418	0.819786	0.904877	0.890745	0.903086	0.84491	0.961399	0.152071
77	0.435791	0.488771	0.519101	0.522161	0.602898	0.521895	0.688036	0.609227	0.655348	0.714848	0.815358	0.867645	0.88638	0.881389	0.842645	0.953376	0.434206	0.488771	0.586434	0.579309	0.670115	0.539603	0.728614	0.630069	0.714759	0.76324	0.824868	0.884824	0.889385	0.896184	0.848426	0.959156	0.431432	0.486464	0.613829	0.690249	0.797252	0.511053	0.787351	0.737867	0.850306	0.852023	0.81897	0.904533	0.890193	0.902538	0.844134	0.961226	0.151465
78	0.434933	0.487958	0.518515	0.521663	0.602362	0.521132	0.68743	0.608394	0.654556	0.714099	0.814589	0.867285	0.885843	0.880978	0.841872	0.953009	0.433737	0.487958	0.585584	0.578837	0.669579	0.538847	0.727894	0.629355	0.714164	0.762672	0.824153	0.884489	0.888822	0.895748	0.847601	0.958913	0.430885	0.485848	0.613482	0.689844	0.796998	0.510188	0.786616	0.737412	0.849913	0.851564	0.818323	0.904067	0.889438	0.902022	0.843409	0.960909	0.150687
79	0.434359	0.487436	0.5181	0.520881	0.601924	0.520214	0.686829	0.607863	0.653954	0.713366	0.813882	0.866855	0.885264	0.8805	0.841423	0.952705	0.433187	0.487436	0.585072	0.578382	0.669014	0.538102	0.727212	0.628317	0.713661	0.76212	0.823545	0.884115	0.888213	0.895232	0.84702	0.958636	0.430369	0.485096	0.61297	0.689465	0.796749	0.509295	0.786001	0.736928	0.849582	0.851119	0.81766	0.903618	0.888852	0.90157	0.842637	0.960533	0.149855
80	0.433789	0.486826	0.517532	0.520299	0.601302	0.519257	0.685976	0.607014	0.653122	0.712753	0.81331	0.866524	0.884702	0.879887	0.840786	0.952387	0.432506	0.486826	0.584438	0.577924	0.668464	0.537264	0.726751	0.627474	0.713217	0.761635	0.823019	0.88374	0.887602	0.894743	0.846312	0.958359	0.429606	0.484577	0.612519	0.688974	0.796443	0.508208	0.785395	0.736453	0.849174	0.850653	0.81709	0.903077	0.888415	0.901156	0.841792	0.960283	0.148844
81	0.433168	0.486211	0.517024	0.519699	0.600749	0.518383	0.685319	0.606179	0.652538	0.711864	0.812756	0.866172	0.884052	0.879351	0.840103	0.952087	0.431892	0.486211	0.583806	0.577292	0.667946	0.536392	0.725935	0.626764	0.712712	0.760929	0.822482	0.883469	0.887089	0.894242	0.845789	0.958106	0.429148	0.48392	0.612036	0.68865	0.796176	0.50706	0.784858	0.735884	0.848851	0.850279	0.816209	0.9026	0.887894	0.900759	0.840946	0.959944	0.148066
82	0.432628	0.485615	0.516539	0.5191	0.600134	0.517776	0.684371	0.605192	0.651871	0.711274	0.812049	0.86583	0.883517	0.878928	0.839491	0.951816	0.431065	0.485615	0.583289	0.576797	0.667535	0.535502	0.725285	0.625947	0.712351	0.760188	0.821744	0.883031	0.886389	0.893852	0.845039	0.957855	0.428482	0.483202	0.611596	0.688252	0.795815	0.506326	0.784215	0.735377	0.848481	0.849796	0.815167	0.902145	0.887357	0.90007	0.839942	0.959701	0.146737
83	0.431922	0.484693	0.516015	0.51854	0.59971	0.517224	0.683884	0.604166	0.651158	0.71068	0.811477	0.865486	0.882808	0.878484	0.838864	0.951485	0.430437	0.484693	0.58291	0.576233	0.667113	0.534592	0.724573	0.625031	0.711929	0.759507	0.821043	0.882667	0.885783	0.893348	0.844319	0.957618	0.428012	0.482414	0.611103	0.687826	0.79557	0.505246	0.78357	0.734926	0.848172	0.849297	0.81445	0.901675	0.886748	0.899442	0.83931	0.959488	0.145859
84	0.431379	0.483912	0.51557	0.51807	0.599122	0.516507	0.683314	0.603424	0.650342	0.709935	0.810996	0.865081	0.882265	0.87806	0.838215	0.951181	0.429918	0.483912	0.582475	0.575803	0.666425	0.533685	0.723876	0.624153	0.71145	0.758864	0.820183	0.882242	0.88513	0.892958	0.843834	0.957365	0.427463	0.481684	0.610635	0.687487	0.795282	0.504468	0.782999	0.734267	0.847796	0.848782	0.813867	0.901356	0.886162	0.898989	0.83843	0.959189	0.145041
85	0.430818	0.483167	0.514976	0.517575	0.598493	0.516011	0.682699	0.602712	0.649625	0.709138	0.810336	0.864673	0.881707	0.877571	0.837723	0.950895	0.429325	0.483167	0.582076	0.575367	0.666053	0.532767	0.723195	0.623364	0.710847	0.758137	0.819521	0.881947	0.884629	0.892545	0.843296	0.957092	0.426923	0.480948	0.610278	0.687101	0.794996	0.503434	0.782489	0.733784	0.847528	0.848246	0.813124	0.900991	0.885489	0.898415	0.837811	0.958916	0.144154
86	0.430352	0.482658	0.514357	0.517023	0.59793	0.515253	0.681978	0.602022	0.648998	0.708399	0.809599	0.864212	0.881174	0.877186	0.837083	0.950579	0.428746	0.482658	0.581667	0.574938	0.665582	0.53209	0.722566	0.622449	0.710334	0.757611	0.818791	0.881586	0.884246	0.891996	0.842573	0.956778	0.426258	0.480413	0.609712	0.686584	0.794732	0.502684	0.782173	0.733171	0.847141	0.847715	0.81256	0.900709	0.884672	0.89779	0.837167	0.958663	0.143241
87	0.429804	0.481911	0.513844	0.51635	0.597521	0.514505	0.681174	0.60115	0.648382	0.707643	0.808741	0.86386	0.880505	0.876784	0.836416	0.950231	0.428246	0.481911	0.581126	0.57449	0.665076	0.531199	0.721784	0.621665	0.709801	0.756967	0.818246	0.881124	0.88372	0.891637	0.842022	0.956507	0.42583	0.479694	0.60917	0.686199	0.794434	0.501947	0.781582	0.732702	0.846724	0.847124	0.812043	0.900366	0.884126	0.897359	0.836323	0.958428	0.142495
88	0.429272	0.481001	0.513267	0.515856	0.596888	0.513686	0.680419	0.600422	0.647883	0.707158	0.808083	0.863563	0.880086	0.876268	0.835643	0.949922	0.427742	0.481001	0.580566	0.573973	0.664564	0.530611	0.721236	0.620888	0.709164	0.756477	0.817662	0.880808	0.883247	0.891239	0.841541	0.956218	0.425237	0.478914	0.608636	0.685819	0.79423	0.501177	0.780913	0.732087	0.846457	0.846535	0.811368	0.899906	0.883693	0.896835	0.83578	0.958221	0.141803
89	0.428726	0.480354	0.512689	0.515296	0.596414	0.512913	0.679579	0.599715	0.647069	0.70666	0.807503	0.863058	0.879376	0.875766	0.83501	0.949702	0.427185	0.480354	0.580045	0.573483	0.664085	0.530015	0.720752	0.6201	0.708741	0.75597	0.81703	0.88054	0.882594	0.89094	0.840847	0.955983	0.424578	0.478182	0.608183	0.68537	0.79404	0.500382	0.780376	0.731581	0.846194	0.846053	0.810529	0.899664	0.883266	0.896512	0.835002	0.957942	0.140989
90	0.428105	0.479733	0.512285	0.514661	0.595909	0.512288	0.678935	0.598943	0.646492	0.706208	0.806857	0.862734	0.878855	0.875275	0.834528	0.949412	0.426696	0.479733	0.579679	0.572947	0.663722	0.529216	0.719959	0.619361	0.708203	0.755492	0.816533	0.880157	0.882138	0.890464	0.840196	0.95572	0.423812	0.477632	0.607611	0.684925	0.793774	0.499678	0.779948	0.73092	0.845911	0.845688	0.809591	0.899252	0.882602	0.896145	0.834354	0.957688	0.140183
91	0.427469	0.479119	0.511832	0.514154	0.595548	0.511533	0.678372	0.59813	0.645904	0.705587	0.806244	0.862256	0.878348	0.874824	0.833794	0.949197	0.426247	0.479119	0.579136	0.572495	0.663219	0.528255	0.719331	0.618776	0.707754	0.754859	0.815821	0.879794	0.881647	0.890075	0.839483	0.955498	0.42315	0.476926	0.607176	0.684541	0.793503	0.498922	0.779415	0.730399	0.84564	0.84527	0.808764	0.898918	0.881965	0.89568	0.833706	0.957468	0.13946
92	0.426961	0.478522	0.511354	0.513688	0.59509	0.510929	0.677563	0.597496	0.64528	0.705005	0.805747	0.861708	0.877842	0.874318	0.833253	0.948874	0.425636	0.478522	0.578638	0.57204	0.662794	0.527594	0.7185	0.618092	0.70711	0.75424	0.815234	0.879368	0.88116	0.889678	0.838739	0.955275	0.422552	0.476173	0.6068	0.684171	0.793257	0.498212	0.778851	0.729936	0.845262	0.844832	0.807981	0.898583	0.881483	0.895296	0.832784	0.957214	0.138583
93	0.426331	0.477819	0.510817	0.513199	0.594688	0.509991	0.677108	0.596883	0.644693	0.704347	0.805138	0.861435	0.877307	0.873673	0.832707	0.948576	0.425037	0.477819	0.578081	0.571444	0.662352	0.52717	0.717888	0.617252	0.706672	0.753864	0.814668	0.878945	0.880653	0.889265	0.83824	0.955046	0.421886	0.47561	0.606338	0.683746	0.792963	0.497291	0.778288	0.729574	0.844891	0.8444	0.807375	0.898197	0.881027	0.894889	0.83193	0.956899	0.137689
94	0.42579	0.477308	0.510412	0.512735	0.594274	0.509271	0.676249	0.596015	0.644318	0.703848	0.804427	0.860994	0.876831	0.873278	0.831997	0.94832	0.424457	0.477308	0.577654	0.570882	0.661859	0.526391	0.717331	0.616557	0.706042	0.753206	0.814101	0.878658	0.880217	0.888793	0.837813	0.954813	0.421343	0.475046	0.605917	0.68326	0.792671	0.496497	0.777788	0.72903	0.844614	0.844025	0.806571	0.897835	0.88048	0.894501	0.831345	0.956621	0.136849
95	0.425186	0.476739	0.509915	0.512081	0.593769	0.508458	0.675392	0.595179	0.643736	0.703192	0.803716	0.860586	0.876436	0.872765	0.831417	0.947979	0.424032	0.476739	0.577146	0.570453	0.661469	0.525623	0.716734	0.615527	0.705608	0.752719	0.813351	0.878316	0.879737	0.8884	0.83732	0.954564	0.420844	0.474381	0.605598	0.68286	0.792457	0.49574	0.777075	0.728512	0.844309	0.84344	0.805891	0.897386	0.87989	0.894066	0.830751	0.956351	0.136177
96	0.424677	0.476107	0.509441	0.511596	0.59333	0.507806	0.674867	0.594583	0.643018	0.702492	0.803111	0.860254	0.875757	0.872302	0.830806	0.947687	0.423503	0.476107	0.57675	0.570012	0.660925	0.524849	0.715925	0.614749	0.70505	0.752313	0.812786	0.87806	0.878974	0.88799	0.83681	0.954273	0.420373	0.473614	0.605157	0.682348	0.792281	0.494936	0.776403	0.728048	0.844001	0.843115	0.80532	0.896955	0.879295	0.893641	0.829666	0.956074	0.135415
97	0.424146	0.475582	0.50896	0.511082	0.592883	0.507092	0.674016	0.593782	0.64233	0.701935	0.802401	0.859833	0.875257	0.871785	0.830162	0.947472	0.422975	0.475582	0.576254	0.569393	0.660527	0.524285	0.715307	0.613799	0.704558	0.751886	0.812087	0.877662	0.878491	0.887559	0.836225	0.954022	0.419907	0.472966	0.604733	0.681936	0.792015	0.493975	0.775979	0.72742	0.843741	0.842636	0.804616	0.896588	0.878804	0.893189	0.829096	0.955825	0.134667
98	0.423669	0.475001	0.508278	0.51062	0.59251	0.506388	0.673291	0.593102	0.641827	0.701374	0.801905	0.859458	0.874727	0.871444	0.829646	0.947252	0.422483	0.475001	0.575874	0.568956	0.660081	0.52365	0.714656	0.613088	0.704137	0.751453	0.811381	0.877253	0.877891	0.887041	0.835689	0.953738	0.419318	0.472213	0.604264	0.681533	0.791718	0.493361	0.775386	0.726893	0.843439	0.842101	0.803939	0.896157	0.878238	0.892665	0.828408	0.955497	0.133894
99	0.423219	0.474471	0.507842	0.510063	0.592025	0.505639	0.672813	0.592359	0.641306	0.700652	0.801141	0.859064	0.874152	0.871017	0.829162	0.946979	0.421943	0.474471	0.575492	0.568422	0.659638	0.522854	0.713945	0.612285	0.703522	0.750976	0.810704	0.877011	0.877369	0.886516	0.835144	0.95353	0.418811	0.471829	0.60378	0.681112	0.791519	0.492515	0.774903	0.726448	0.843144	0.841498	0.803395	0.895827	0.877782	0.892198	0.82777	0.955302	0.133058
100	0.422736	0.474013	0.507367	0.50932	0.591527	0.504899	0.672016	0.591796	0.64088	0.699928	0.800583	0.858703	0.873668	0.870524	0.828414	0.946705	0.421468	0.474013	0.575014	0.567968	0.659274	0.522108	0.713333	0.611576	0.703008	0.750548	0.810258	0.87661	0.876697	0.886038	0.834479	0.953328	0.418321	0.471252	0.603246	0.680715	0.791218	0.491685	0.774381	0.726078	0.842779	0.841056	0.802408	0.895507	0.877239	0.89189	0.827308	0.955049	0.132406
101	0.422186	0.473522	0.506932	0.508709	0.590997	0.504326	0.671148	0.591202	0.640278	0.699336	0.800066	0.858355	0.873075	0.869909	0.82797	0.946402	0.420889	0.473522	0.574632	0.567486	0.658943	0.521365	0.712598	0.61096	0.702565	0.749984	0.809682	0.876259	0.876179	0.885559	0.833913	0.953051	0.417931	0.470873	0.602906	0.680348	0.790964	0.491115	0.773786	0.725756	0.842448	0.84058	0.801792	0.895024	0.876833	0.891414	0.826616	0.954765	0.13159
102	0.42176	0.472999	0.50651	0.508224	0.590516	0.503604	0.670361	0.590599	0.639723	0.698734	0.799516	0.857984	0.87254	0.869293	0.82724	0.94605	0.420512	0.472999	0.574166	0.567004	0.658562	0.520647	0.712097	0.610351	0.702033	0.749567	0.809054	0.876017	0.875634	0.885176	0.8333	0.952823	0.417425	0.470364	0.602591	0.679832	0.790736	0.490506	0.773272	0.725279	0.842126	0.840211	0.801154	0.894614	0.876334	0.891031	0.826007	0.954536	0.131024
103	0.421344	0.47218	0.506063	0.507917	0.590008	0.503051	0.669591	0.589925	0.639275	0.698095	0.798801	0.857456	0.871957	0.868811	0.826676	0.945785	0.420007	0.47218	0.573758	0.566587	0.658229	0.519818	0.711331	0.609791	0.701502	0.748987	0.808422	0.875669	0.875102	0.88477	0.832537	0.95266	0.416927	0.469625	0.602098	0.679439	0.790523	0.489644	0.772731	0.724814	0.841868	0.839915	0.800437	0.89429	0.875764	0.890527	0.825533	0.954266	0.130273
104	0.420667	0.471619	0.505647	0.507446	0.589494	0.502242	0.668914	0.589224	0.638797	0.697507	0.798191	0.857164	0.871481	0.868395	0.826218	0.945456	0.419418	0.471619	0.573371	0.566245	0.657789	0.519128	0.710868	0.60926	0.701037	0.748521	0.807755	0.875401	0.874467	0.884291	0.831888	0.952416	0.416505	0.469129	0.601661	0.679035	0.790253	0.489006	0.772252	0.724391	0.841601	0.839527	0.799889	0.893997	0.875273	0.890079	0.824848	0.953969	0.129321
105	0.420037	0.471087	0.505265	0.507041	0.589105	0.501273	0.668278	0.588642	0.638267	0.696986	0.797664	0.856766	0.87105	0.867929	0.825538	0.94521	0.418939	0.471087	0.57304	0.565868	0.657454	0.518535	0.710204	0.608835	0.70048	0.748112	0.807232	0.875084	0.873744	0.883844	0.831255	0.952242	0.416046	0.468583	0.601022	0.678676	0.790015	0.488358	0.771719	0.723988	0.841336	0.839152	0.799174	0.893572	0.874685	0.889706	0.824106	0.953645	0.128538
106	0.419591	0.470693	0.50492	0.506592	0.588699	0.500814	0.6676	0.587902	0.637755	0.696507	0.797073	0.856426	0.870395	0.867532	0.825097	0.944949	0.418423	0.470693	0.572669	0.565381	0.657056	0.51786	0.70963	0.608099	0.700001	0.747653	0.806626	0.874798	0.873249	0.883414	0.830751	0.952047	0.41556	0.468161	0.600676	0.678261	0.789835	0.48771	0.771243	0.723503	0.841083	0.838651	0.79856	0.893283	0.874118	0.889367	0.823432	0.953459	0.127834
107	0.419119	0.470186	0.504525	0.506122	0.588276	0.50007	0.666946	0.587016	0.637246	0.695852	0.796426	0.856105	0.870016	0.867063	0.824609	0.944748	0.417893	0.470186	0.572187	0.565074	0.656619	0.517364	0.70899	0.607505	0.699459	0.747144	0.806059	0.874463	0.872839	0.882939	0.830051	0.951756	0.415106	0.467696	0.60028	0.677959	0.789555	0.487068	0.770716	0.722998	0.840763	0.838252	0.797783	0.892896	0.873551	0.889012	0.82267	0.953188	0.127119
108	0.418557	0.469725	0.504064	0.505731	0.587753	0.499227	0.666202	0.586375	0.636691	0.695111	0.79585	0.855782	0.869411	0.866712	0.823987	0.94454	0.417497	0.469725	0.571806	0.564525	0.656301	0.516584	0.708477	0.606959	0.698915	0.746622	0.80543	0.87418	0.872318	0.882443	0.829534	0.951478	0.414636	0.467078	0.599861	0.677648	0.789255	0.486394	0.770057	0.72256	0.840552	0.837809	0.797156	0.892465	0.873076	0.888608	0.822043	0.952848	0.126514
109	0.418066	0.469163	0.503604	0.505075	0.587343	0.498658	0.665567	0.585636	0.636046	0.69457	0.795167	0.855501	0.868951	0.866175	0.823253	0.944346	0.41706	0.469163	0.571334	0.56419	0.655902	0.515947	0.707853	0.606227	0.698369	0.746001	0.804707	0.873807	0.871744	0.882054	0.828962	0.951244	0.414052	0.466445	0.599319	0.677294	0.789052	0.485597	0.769588	0.722138	0.840231	0.837226	0.796538	0.892042	0.87258	0.888031	0.821299	0.952606	0.125754
110	0.417632	0.468525	0.503028	0.504677	0.586881	0.497958	0.664991	0.585024	0.635438	0.694036	0.79459	0.855192	0.868415	0.865676	0.822611	0.944024	0.416437	0.468525	0.570985	0.563645	0.655483	0.515483	0.707316	0.605687	0.697808	0.745472	0.804036	0.873453	0.871252	0.88167	0.828491	0.951005	0.413452	0.465719	0.598964	0.677046	0.78882	0.484856	0.769025	0.721604	0.839922	0.836839	0.795919	0.891746	0.872021	0.887606	0.82065	0.952369	0.124823
111	0.417098	0.468084	0.502705	0.504146	0.586442	0.497357	0.664297	0.584478	0.634749	0.693511	0.794012	0.85491	0.867765	0.865317	0.821895	0.943706	0.415902	0.468084	0.570586	0.563296	0.655069	0.514977	0.70645	0.60472	0.69731	0.744949	0.803518	0.873087	0.870881	0.881163	0.827827	0.950764	0.413008	0.465212	0.598598	0.676723	0.788614	0.484213	0.768522	0.721243	0.83971	0.836441	0.795309	0.891406	0.871496	0.8872	0.81984	0.952027	0.124038
112	0.416677	0.467405	0.502222	0.503689	0.586088	0.496874	0.663546	0.583468	0.634292	0.692952	0.793333	0.854538	0.867209	0.864844	0.82147	0.943515	0.415539	0.467405	0.570215	0.562952	0.654647	0.514393	0.70589	0.604177	0.696964	0.744388	0.802965	0.872799	0.870479	0.88082	0.827359	0.950571	0.412615	0.4647	0.598195	0.676402	0.788326	0.483438	0.768009	0.720722	0.839466	0.836078	0.794751	0.890911	0.870992	0.886821	0.81928	0.951777	0.123498
113	0.416199	0.466965	0.501822	0.503222	0.585692	0.496375	0.662939	0.582937	0.633801	0.692284	0.7925	0.854191	0.866663	0.864341	0.820997	0.943261	0.415071	0.466965	0.569845	0.562596	0.654112	0.513855	0.705299	0.603595	0.696449	0.743957	0.80218	0.872449	0.870042	0.880351	0.826849	0.950376	0.412106	0.464126	0.597814	0.676025	0.788091	0.48285	0.767479	0.720254	0.839266	0.835765	0.794021	0.890512	0.870664	0.886347	0.818865	0.951513	0.122768
114	0.415825	0.466377	0.501387	0.502773	0.585274	0.495888	0.662186	0.582309	0.633333	0.691681	0.791838	0.853911	0.866149	0.863789	0.820517	0.943013	0.414472	0.466377	0.569311	0.562128	0.653762	0.513319	0.704583	0.603032	0.695988	0.743509	0.801634	0.872054	0.869653	0.880023	0.826322	0.950127	0.411497	0.463451	0.59731	0.675677	0.78786	0.482338	0.76701	0.719789	0.839036	0.835303	0.793386	0.890195	0.870136	0.885858	0.818305	0.951303	0.121828
115	0.415339	0.465906	0.501082	0.502277	0.584769	0.495403	0.661561	0.581525	0.632777	0.691178	0.791277	0.853634	0.865664	0.863302	0.819935	0.942713	0.414034	0.465906	0.568918	0.561719	0.6534	0.512754	0.703817	0.602471	0.695715	0.743112	0.800987	0.871736	0.869175	0.879521	0.825855	0.949919	0.411153	0.462878	0.59687	0.67539	0.787617	0.481592	0.766504	0.719249	0.838799	0.834914	0.792948	0.889837	0.869718	0.885434	0.817635	0.951023	0.121149
116	0.414859	0.465283	0.50069	0.501809	0.584281	0.494939	0.66094	0.580737	0.632168	0.690574	0.790868	0.853235	0.865115	0.862945	0.819289	0.942494	0.413663	0.465283	0.568471	0.561223	0.653113	0.51227	0.703261	0.601839	0.695283	0.742698	0.800516	0.871361	0.868686	0.879177	0.825352	0.949644	0.410764	0.462303	0.596526	0.674994	0.78731	0.48112	0.766018	0.718834	0.838503	0.834502	0.792245	0.889437	0.869225	0.885009	0.816912	0.950735	0.120678
117	0.414374	0.464625	0.500258	0.501414	0.583865	0.494309	0.66022	0.580002	0.631634	0.689953	0.790309	0.852825	0.864522	0.862511	0.818773	0.942249	0.413286	0.464625	0.568042	0.560729	0.652746	0.511668	0.70273	0.601429	0.694888	0.742232	0.799726	0.871033	0.868234	0.878779	0.824817	0.94941	0.410165	0.461582	0.596131	0.674678	0.787027	0.480463	0.76546	0.718363	0.838235	0.834072	0.791431	0.8891	0.868647	0.884552	0.816253	0.950442	0.120134
118	0.413978	0.464106	0.499762	0.501042	0.58345	0.493693	0.659756	0.579447	0.631193	0.689373	0.789763	0.852459	0.864067	0.862121	0.818295	0.942035	0.412854	0.464106	0.567594	0.560375	0.652421	0.511097	0.702091	0.600855	0.694479	0.741789	0.799389	0.870688	0.867861	0.878417	0.824339	0.9492	0.409765	0.46094	0.59588	0.674257	0.78684	0.479641	0.764976	0.718002	0.837952	0.833744	0.790854	0.888767	0.868183	0.884143	0.815549	0.950162	0.119448
119	0.413462	0.463656	0.499273	0.500545	0.582981	0.493168	0.659237	0.578856	0.630664	0.688812	0.789072	0.8521	0.863631	0.861722	0.817809	0.941849	0.412517	0.463656	0.567018	0.559965	0.652131	0.510454	0.70146	0.600098	0.694158	0.741368	0.79884	0.870409	0.867415	0.877895	0.823771	0.948953	0.409261	0.460525	0.595515	0.673943	0.786644	0.479041	0.764452	0.717546	0.837654	0.83325	0.790283	0.888418	0.867626	0.883698	0.81485	0.94986	0.118941
120	0.413173	0.463084	0.498965	0.500127	0.582556	0.492628	0.658631	0.578308	0.63008	0.688287	0.788574	0.851775	0.863137	0.861169	0.817299	0.941584	0.412076	0.463084	0.566597	0.559584	0.651719	0.509787	0.700854	0.599456	0.693758	0.740956	0.798346	0.87014	0.86705	0.877519	0.823283	0.94877	0.408784	0.45983	0.595122	0.673586	0.786379	0.478351	0.763913	0.717191	0.837408	0.832828	0.789759	0.888016	0.86699	0.883235	0.814116	0.949629	0.118323
121	0.412729	0.462563	0.498621	0.499643	0.582142	0.491999	0.658096	0.57775	0.629396	0.687672	0.787875	0.851406	0.862607	0.860626	0.816955	0.941347	0.411705	0.462563	0.566065	0.559077	0.65127	0.509211	0.700375	0.598937	0.693301	0.740589	0.797802	0.869748	0.866715	0.87714	0.822684	0.948558	0.40833	0.459414	0.594742	0.673256	0.786116	0.477705	0.763319	0.716683	0.837181	0.832326	0.789182	0.887549	0.866424	0.882852	0.813448	0.949399	0.117746
122	0.41226	0.462141	0.498285	0.499082	0.581542	0.491406	0.657493	0.577193	0.628974	0.687283	0.787293	0.851115	0.862159	0.860284	0.816437	0.941115	0.411211	0.462141	0.565569	0.558675	0.650871	0.508571	0.699888	0.598148	0.692853	0.740121	0.797154	0.869437	0.86632	0.876778	0.822144	0.94835	0.407901	0.45895	0.594407	0.672915	0.78593	0.47691	0.762862	0.7163	0.83686	0.831885	0.788427	0.887281	0.865878	0.882432	0.812848	0.949129	0.11705
123	0.411794	0.461629	0.49785	0.498509	0.581111	0.490756	0.656925	0.57663	0.628545	0.686744	0.786759	0.850834	0.861728	0.859817	0.815939	0.940805	0.410836	0.461629	0.565185	0.558118	0.650484	0.507908	0.699163	0.597731	0.692304	0.739683	0.79654	0.869092	0.865844	0.876467	0.821395	0.948111	0.407432	0.458339	0.594004	0.67257	0.785717	0.47644	0.762265	0.715884	0.836597	0.831421	0.787932	0.886986	0.865315	0.881883	0.812118	0.948886	0.116488
124	0.411501	0.461144	0.497366	0.498102	0.580646	0.490232	0.656225	0.57619	0.628189	0.68633	0.78615	0.850358	0.861308	0.859407	0.815453	0.940475	0.410423	0.461144	0.564795	0.557737	0.650028	0.507407	0.698622	0.59712	0.691887	0.739144	0.795961	0.868825	0.865198	0.876034	0.820809	0.947935	0.407044	0.457805	0.593659	0.672243	0.785526	0.475951	0.761807	0.71552	0.83634	0.831125	0.787398	0.886638	0.864812	0.881516	0.81137	0.948628	0.115808
125	0.411145	0.46069	0.496923	0.497658	0.580279	0.489627	0.655588	0.575702	0.627733	0.685823	0.785649	0.850071	0.860889	0.858995	0.814824	0.940272	0.409974	0.46069	0.56451	0.557377	0.649601	0.50693	0.698051	0.596675	0.691388	0.738724	0.795396	0.868496	0.864799	0.875739	0.820191	0.947717	0.406648	0.457257	0.593276	0.671907	0.785303	0.475372	0.761338	0.715034	0.836069	0.830623	0.78672	0.886158	0.864401	0.881032	0.810826	0.948429	0.115142
126	0.41071	0.460099	0.496425	0.497297	0.579806	0.489001	0.655092	0.575224	0.627271	0.685356	0.785128	0.849689	0.86039	0.858547	0.814392	0.939938	0.409539	0.460099	0.56417	0.557013	0.649203	0.506424	0.697506	0.596013	0.690972	0.73829	0.794828	0.868033	0.864325	0.875367	0.819554	0.947503	0.406215	0.456817	0.592961	0.671627	0.785059	0.474831	0.760947	0.714684	0.835842	0.830221	0.786066	0.885837	0.863772	0.880603	0.810171	0.948177	0.114499
127	0.410427	0.459641	0.495967	0.496844	0.579412	0.488477	0.654414	0.574557	0.626694	0.684919	0.784629	0.849286	0.859942	0.858044	0.813899	0.939723	0.409096	0.459641	0.563862	0.556682	0.648861	0.505906	0.696931	0.595619	0.690522	0.73787	0.794235	0.867692	0.86396	0.875012	0.819127	0.947253	0.405768	0.456457	0.59255	0.671293	0.784773	0.474307	0.760437	0.714392	0.835532	0.829883	0.785523	0.885516	0.86321	0.880254	0.809584	0.947894	0.11391
128	0.410047	0.459131	0.49551	0.496576	0.578974	0.48801	0.653898	0.573818	0.626208	0.684599	0.784155	0.84904	0.859499	0.857681	0.8133	0.939459	0.40876	0.459131	0.563571	0.556307	0.64846	0.505352	0.696468	0.595078	0.690145	0.737462	0.793788	0.867322	0.863636	0.874578	0.818577	0.947097	0.405319	0.456091	0.592177	0.670977	0.784496	0.473766	0.760001	0.713969	0.835217	0.829459	0.78482	0.885225	0.862651	0.879965	0.808962	0.947665	0.113467
129	0.409592	0.458558	0.495176	0.496085	0.57853	0.487343	0.653291	0.573361	0.625616	0.684185	0.783564	0.848747	0.859175	0.857395	0.812813	0.939184	0.408396	0.458558	0.563242	0.555999	0.648062	0.504913	0.695913	0.594506	0.689736	0.736992	0.793254	0.867004	0.863234	0.874251	0.817984	0.946865	0.40494	0.455381	0.591705	0.670649	0.784309	0.473249	0.759565	0.713608	0.834975	0.829171	0.784293	0.884804	0.862164	0.879508	0.808447	0.947452	0.112832
130	0.409163	0.458133	0.494698	0.495592	0.57818	0.486819	0.652581	0.572803	0.624947	0.68361	0.783187	0.848333	0.858728	0.857	0.812276	0.938926	0.407945	0.458133	0.562908	0.555627	0.647595	0.504376	0.695426	0.593884	0.689186	0.736563	0.792772	0.866723	0.862727	0.87391	0.817563	0.946662	0.404428	0.455004	0.591384	0.670249	0.78413	0.472477	0.758927	0.713148	0.834694	0.828782	0.783727	0.884452	0.861672	0.879104	0.807779	0.947169	0.112238
131	0.408676	0.457594	0.494351	0.495053	0.577675	0.486311	0.652135	0.572171	0.624576	0.683218	0.782631	0.848012	0.85817	0.85651	0.81165	0.938667	0.407521	0.457594	0.56259	0.555327	0.647252	0.503978	0.694944	0.593418	0.688809	0.736089	0.792259	0.866322	0.862419	0.873575	0.817182	0.946483	0.403951	0.454403	0.591045	0.66992	0.783965	0.471973	0.758413	0.712821	0.83447	0.828367	0.783022	0.884099	0.861005	0.878579	0.807206	0.946894	0.111498
132	0.408245	0.456975	0.493976	0.494557	0.577287	0.485679	0.65138	0.571689	0.624225	0.682748	0.782045	0.847697	0.857691	0.85616	0.811237	0.938463	0.407009	0.456975	0.562159	0.554909	0.646949	0.503448	0.694505	0.592907	0.688497	0.735637	0.791825	0.866025	0.861808	0.87318	0.816576	0.946284	0.403426	0.453703	0.590804	0.669569	0.783716	0.471382	0.75789	0.712438	0.834197	0.827951	0.782412	0.883783	0.860564	0.878186	0.806536	0.94661	0.110739
133	0.407778	0.45643	0.493668	0.494321	0.576937	0.485181	0.650935	0.571029	0.62359	0.682297	0.781586	0.847385	0.857237	0.855835	0.810712	0.93825	0.406576	0.45643	0.561834	0.554529	0.646579	0.502921	0.693896	0.592444	0.688001	0.735097	0.791423	0.865791	0.861448	0.872849	0.816214	0.94604	0.402975	0.452868	0.590482	0.669236	0.783537	0.470618	0.75748	0.712048	0.833979	0.827626	0.781886	0.883404	0.860145	0.877755	0.805867	0.94637	0.110135
134	0.407243	0.4559	0.493244	0.494026	0.576588	0.484587	0.650497	0.570379	0.623034	0.681909	0.781001	0.847031	0.856934	0.855449	0.809904	0.938063	0.406227	0.4559	0.561416	0.554289	0.646074	0.50245	0.693487	0.591824	0.6876	0.734497	0.79089	0.865444	0.860963	0.872494	0.81578	0.945875	0.402605	0.452417	0.590161	0.668903	0.783328	0.47013	0.75696	0.711677	0.833728	0.827171	0.781261	0.883005	0.859642	0.877365	0.80523	0.946113	0.109542
135	0.406875	0.455444	0.492902	0.493628	0.576167	0.484072	0.649785	0.569864	0.622493	0.68143	0.780446	0.846699	0.856586	0.855062	0.809455	0.937776	0.40577	0.455444	0.561097	0.553982	0.645688	0.501987	0.692897	0.591382	0.687203	0.734168	0.790419	0.865154	0.860542	0.872109	0.815132	0.945619	0.402093	0.451989	0.589858	0.668578	0.783161	0.469664	0.756281	0.711348	0.833501	0.826648	0.780734	0.882615	0.859122	0.876867	0.80472	0.945828	0.108833
136	0.406432	0.454945	0.492499	0.493176	0.575739	0.483534	0.64899	0.569258	0.622019	0.680983	0.779997	0.846361	0.856226	0.854676	0.80892	0.937575	0.405355	0.454945	0.560692	0.553544	0.645362	0.501616	0.692304	0.590907	0.68673	0.733759	0.789815	0.864869	0.860184	0.871782	0.814536	0.945441	0.401579	0.451585	0.589496	0.668162	0.782938	0.469163	0.755792	0.711032	0.833302	0.826273	0.78029	0.882212	0.858734	0.876441	0.804074	0.945603	0.108181
137	0.405907	0.454558	0.49208	0.492755	0.575355	0.48294	0.648615	0.568725	0.621635	0.680459	0.779404	0.846123	0.855769	0.854213	0.808467	0.937387	0.404889	0.454558	0.560224	0.553178	0.644988	0.501153	0.691687	0.590231	0.686277	0.73335	0.789367	0.86456	0.859878	0.871372	0.814058	0.94525	0.401135	0.451146	0.589141	0.66779	0.78277	0.468636	0.755369	0.710722	0.833028	0.825888	0.779776	0.88185	0.858289	0.875882	0.803511	0.945391	0.107481
138	0.405522	0.454119	0.491682	0.492279	0.574975	0.482598	0.648012	0.568009	0.621142	0.679847	0.778866	0.845647	0.855328	0.853788	0.807963	0.937145	0.404463	0.454119	0.559943	0.552864	0.644443	0.500568	0.690883	0.589645	0.685816	0.732899	0.788878	0.864296	0.859401	0.871016	0.813511	0.945024	0.4006	0.450801	0.588729	0.667482	0.782539	0.468031	0.754916	0.71026	0.832788	0.825586	0.779303	0.881534	0.857855	0.875585	0.802805	0.94512	0.106848
139	0.405237	0.4538	0.491322	0.491927	0.574539	0.482199	0.647532	0.567511	0.620618	0.679414	0.778315	0.845296	0.854971	0.853498	0.80751	0.936946	0.404027	0.4538	0.559613	0.552429	0.644003	0.499949	0.690414	0.589026	0.685337	0.732409	0.788454	0.863907	0.858742	0.870705	0.813087	0.944852	0.400167	0.450256	0.588512	0.667234	0.782331	0.467509	0.754248	0.709921	0.832525	0.825159	0.778798	0.881221	0.857362	0.875164	0.802235	0.944847	0.106212
140	0.404764	0.453409	0.490975	0.491588	0.574157	0.481721	0.646947	0.56695	0.620159	0.67906	0.777803	0.844983	0.854589	0.853189	0.80702	0.936771	0.403598	0.453409	0.559292	0.552108	0.643655	0.49937	0.689767	0.588487	0.684885	0.732031	0.787898	0.863561	0.858376	0.870351	0.812399	0.944678	0.399734	0.449759	0.588139	0.666856	0.782111	0.467021	0.753881	0.709381	0.83232	0.824743	0.778318	0.880915	0.856883	0.874816	0.801506	0.944609	0.105596
141	0.404247	0.452952	0.490706	0.491058	0.573847	0.481393	0.646398	0.566306	0.619647	0.678676	0.777383	0.844644	0.854095	0.852751	0.80644	0.936585	0.403323	0.452952	0.558949	0.551774	0.643283	0.498775	0.6894	0.58817	0.684452	0.7317	0.787376	0.863253	0.858015	0.869877	0.811849	0.944464	0.399322	0.449326	0.587883	0.66651	0.78189	0.466532	0.753465	0.709056	0.832088	0.824383	0.777876	0.880583	0.85652	0.874407	0.800925	0.944305	0.105166
142	0.403786	0.452417	0.490249	0.490709	0.573483	0.480963	0.646066	0.565739	0.619162	0.678212	0.776981	0.844343	0.853776	0.852406	0.805893	0.936361	0.402874	0.452382	0.558598	0.551485	0.642997	0.498337	0.688789	0.587592	0.683945	0.7313	0.786914	0.862901	0.85749	0.869518	0.811434	0.944261	0.398938	0.44886	0.587644	0.666145	0.781682	0.466103	0.753	0.708708	0.831846	0.824005	0.777312	0.880264	0.855947	0.874118	0.800446	0.944028	0.104534
143	0.403441	0.451961	0.489895	0.490348	0.573124	0.480519	0.645512	0.565103	0.618726	0.677699	0.776548	0.843996	0.853544	0.851897	0.805367	0.936153	0.402404	0.451958	0.558287	0.551234	0.642691	0.497912	0.68808	0.587132	0.683589	0.730982	0.786242	0.862586	0.857022	0.869045	0.811005	0.944079	0.398535	0.448331	0.587338	0.665923	0.781462	0.4657	0.752582	0.708371	0.8316	0.823472	0.776711	0.88003	0.855355	0.873757	0.799896	0.943786	0.103922
144	0.402935	0.45151	0.489587	0.489906	0.572679	0.479927	0.645007	0.564401	0.618267	0.677124	0.776089	0.843573	0.853104	0.851545	0.805016	0.935919	0.402099	0.451505	0.55803	0.550853	0.642308	0.497319	0.687628	0.586598	0.683196	0.730548	0.785738	0.862266	0.856568	0.868722	0.810495	0.943846	0.39828	0.447846	0.587096	0.665621	0.78125	0.465107	0.752266	0.708038	0.831362	0.823053	0.776191	0.879707	0.854971	0.873186	0.799399	0.943569	0.103394
145	0.402556	0.451059	0.489204	0.489579	0.572385	0.479372	0.644441	0.563739	0.617776	0.676645	0.775332	0.843195	0.852655	0.851194	0.804602	0.935721	0.401749	0.451046	0.557712	0.550505	0.64201	0.496632	0.687129	0.586023	0.682845	0.730156	0.78524	0.861898	0.856231	0.868394	0.809866	0.943584	0.397903	0.447398	0.586753	0.665291	0.781063	0.464501	0.751633	0.707631	0.831138	0.822564	0.775729	0.879357	0.854609	0.87288	0.79873	0.9433	0.102831
146	0.40208	0.450647	0.488786	0.489149	0.571973	0.47875	0.64386	0.563176	0.617343	0.676131	0.774975	0.842873	0.852116	0.85087	0.804085	0.935446	0.401377	0.450632	0.557417	0.550188	0.641709	0.496111	0.686615	0.585602	0.682442	0.729831	0.784892	0.861572	0.855763	0.867966	0.809364	0.943391	0.397495	0.446901	0.586452	0.664896	0.780847	0.46391	0.751141	0.707249	0.830921	0.822208	0.775173	0.878927	0.854162	0.872433	0.798143	0.943027	0.102279
147	0.401625	0.450138	0.488428	0.488722	0.571588	0.478276	0.643392	0.562527	0.616921	0.675676	0.774466	0.842584	0.851705	0.850597	0.803777	0.935178	0.40098	0.450131	0.556994	0.54992	0.641392	0.495714	0.686068	0.585014	0.681966	0.729381	0.784345	0.861318	0.855187	0.867604	0.80884	0.943173	0.397174	0.446489	0.586138	0.664639	0.780615	0.463409	0.750532	0.706925	0.830661	0.82178	0.774612	0.878634	0.853607	0.872054	0.797512	0.942786	0.10171
148	0.401274	0.449641	0.488121	0.48833	0.57125	0.477863	0.643004	0.561724	0.616555	0.675258	0.774104	0.842291	0.851322	0.850184	0.803391	0.934913	0.400555	0.449605	0.556645	0.549511	0.641052	0.495116	0.68545	0.584528	0.681607	0.729093	0.783903	0.861045	0.854823	0.867227	0.808332	0.942988	0.396819	0.44598	0.585796	0.664298	0.780383	0.462717	0.750004	0.706587	0.830478	0.821342	0.774102	0.878276	0.853031	0.87167	0.79697	0.942548	0.101063
149	0.400833	0.449167	0.487781	0.487885	0.570922	0.477316	0.642432	0.561235	0.61623	0.674765	0.773578	0.841944	0.850872	0.849747	0.80299	0.934737	0.400199	0.449164	0.556306	0.54916	0.640761	0.494604	0.685053	0.584165	0.681232	0.728794	0.783438	0.860725	0.854312	0.866983	0.807852	0.942792	0.396537	0.44552	0.585454	0.663998	0.780079	0.462184	0.749476	0.706337	0.830218	0.820982	0.773581	0.877882	0.852466	0.871148	0.79649	0.942295	0.100583
150	0.400451	0.448895	0.487361	0.487487	0.570592	0.476799	0.641935	0.560533	0.615767	0.674319	0.773058	0.841659	0.85044	0.849255	0.802506	0.934518	0.399894	0.448892	0.555969	0.548844	0.640347	0.494044	0.684545	0.583749	0.68088	0.728349	0.783024	0.860419	0.853805	0.866719	0.807353	0.942595	0.396212	0.445168	0.585217	0.663707	0.779872	0.461613	0.74901	0.706072	0.829984	0.82067	0.773016	0.877556	0.85194	0.870752	0.796145	0.941932	0.10009
151	0.400025	0.44855	0.487034	0.487092	0.570258	0.476395	0.641419	0.559894	0.615183	0.673771	0.772666	0.841337	0.849832	0.848914	0.802121	0.934266	0.399544	0.448526	0.55562	0.548524	0.639967	0.493472	0.683936	0.583199	0.680591	0.727928	0.782561	0.860165	0.853288	0.866383	0.806626	0.942333	0.395816	0.444511	0.584796	0.663516	0.779689	0.461102	0.748521	0.705717	0.82973	0.820329	0.772492	0.877255	0.851433	0.870333	0.795744	0.941738	0.0995821
152	0.399577	0.448049	0.486713	0.486743	0.569867	0.475808	0.64078	0.559465	0.614679	0.673377	0.772189	0.840969	0.849489	0.848506	0.801557	0.934099	0.399166	0.448043	0.555282	0.548192	0.63969	0.493014	0.683529	0.582639	0.680171	0.727445	0.782205	0.859824	0.852801	0.866024	0.806225	0.942123	0.395332	0.443938	0.584584	0.66315	0.779474	0.460657	0.748081	0.705381	0.829513	0.819907	0.771785	0.87689	0.850984	0.869883	0.795303	0.941533	0.0991156
153	0.399245	0.447558	0.486332	0.486328	0.569567	0.475396	0.640324	0.55901	0.61428	0.672852	0.771642	0.840652	0.849046	0.847985	0.800865	0.933856	0.398869	0.447548	0.555016	0.547783	0.639361	0.492656	0.683015	0.582203	0.67976	0.727039	0.781614	0.859592	0.852496	0.865698	0.805693	0.941878	0.394998	0.443503	0.584246	0.662817	0.779304	0.460084	0.74766	0.705057	0.8293	0.819612	0.771372	0.876668	0.850598	0.8695	0.794863	0.941241	0.0986303
154	0.398777	0.447172	0.486009	0.485953	0.569245	0.47493	0.639789	0.55852	0.613874	0.672473	0.771161	0.840369	0.848697	0.847688	0.800473	0.93358	0.398533	0.447158	0.554762	0.547345	0.639043	0.492162	0.682346	0.581704	0.679357	0.726654	0.781041	0.85926	0.85203	0.865427	0.805212	0.941624	0.394668	0.443029	0.583838	0.662404	0.779069	0.459533	0.747103	0.704621	0.829067	0.819279	0.770948	0.876299	0.85018	0.869052	0.794202	0.941007	0.0981361
155	0.398425	0.446655	0.485658	0.485606	0.5689	0.474442	0.638993	0.557994	0.613359	0.671986	0.770705	0.840089	0.848283	0.847362	0.800103	0.933316	0.398115	0.446651	0.55455	0.546988	0.63876	0.491555	0.681916	0.5811	0.67887	0.72629	0.780525	0.858978	0.851558	0.86508	0.804766	0.941353	0.394303	0.442598	0.583521	0.662069	0.778802	0.459074	0.746631	0.704257	0.828854	0.81886	0.770519	0.876029	0.84967	0.868657	0.793724	0.940748	0.0975415
156	0.398129	0.44617	0.485275	0.485284	0.568496	0.474054	0.638467	0.557511	0.612929	0.671481	0.770209	0.839788	0.847884	0.847087	0.799453	0.933121	0.397698	0.446147	0.55429	0.546677	0.638472	0.491107	0.681276	0.580671	0.678408	0.725932	0.780103	0.858692	0.851147	0.864614	0.804326	0.941155	0.393981	0.442164	0.583139	0.661804	0.778549	0.458408	0.74622	0.703947	0.828652	0.81853	0.770105	0.875786	0.849269	0.868349	0.793156	0.940556	0.0969079
157	0.397773	0.445736	0.484951	0.484991	0.568189	0.473627	0.637978	0.556874	0.612467	0.671073	0.769854	0.839484	0.847423	0.846585	0.798965	0.93292	0.397335	0.44568	0.553993	0.546315	0.638205	0.490453	0.680639	0.580201	0.67809	0.725586	0.779604	0.858441	0.850699	0.864186	0.803876	0.940946	0.393638	0.441684	0.582909	0.661526	0.778358	0.457908	0.745767	0.703493	0.828349	0.818147	0.769481	0.875443	0.848834	0.868006	0.792621	0.9404	0.0962724
158	0.397398	0.445268	0.484634	0.484665	0.567929	0.473204	0.637466	0.556293	0.611941	0.670685	0.769394	0.839176	0.846945	0.846232	0.798472	0.932781	0.39705	0.445243	0.55364	0.545837	0.637913	0.489928	0.680071	0.579598	0.677751	0.725146	0.779202	0.858168	0.850252	0.863827	0.803353	0.94066	0.393421	0.441154	0.582645	0.661154	0.778163	0.457317	0.745406	0.703241	0.828035	0.817821	0.768975	0.875139	0.848387	0.867699	0.792023	0.940191	0.0958047
159	0.397017	0.444925	0.484262	0.484334	0.567586	0.472789	0.63698	0.555792	0.611541	0.67019	0.768989	0.838839	0.846456	0.845891	0.798076	0.93258	0.396732	0.4449	0.553353	0.545541	0.637639	0.489397	0.679569	0.579205	0.677478	0.724783	0.77879	0.857854	0.849826	0.863523	0.802881	0.940451	0.393088	0.440708	0.582404	0.660774	0.777963	0.456858	0.744927	0.702989	0.827754	0.817403	0.768492	0.87477	0.848072	0.867247	0.791653	0.939892	0.0954019
160	0.396729	0.4446	0.483901	0.483996	0.567254	0.472371	0.636496	0.555244	0.611158	0.6697	0.768599	0.838511	0.846035	0.845546	0.797682	0.932305	0.39642	0.444582	0.553131	0.545186	0.637217	0.48885	0.679127	0.578628	0.677123	0.724428	0.778456	0.857602	0.849364	0.863188	0.802384	0.940248	0.392681	0.440184	0.582112	0.660373	0.777751	0.456322	0.744426	0.702593	0.827583	0.817042	0.768021	0.874376	0.847647	0.866795	0.791234	0.939461	0.0948984
161	0.396453	0.444172	0.483519	0.483638	0.566932	0.471881	0.635969	0.554733	0.610734	0.669331	0.768209	0.838224	0.845665	0.845243	0.797164	0.932088	0.396099	0.44413	0.552835	0.544864	0.636798	0.488367	0.678625	0.578167	0.676752	0.724091	0.77799	0.857353	0.849031	0.862887	0.801833	0.940063	0.392402	0.439811	0.581759	0.66004	0.777601	0.455743	0.743905	0.702334	0.827378	0.81663	0.767512	0.873915	0.847145	0.866325	0.79053	0.939204	0.0943885
162	0.39619	0.443837	0.483185	0.483292	0.566571	0.471466	0.635433	0.554247	0.610223	0.668917	0.767656	0.837972	0.845167	0.844858	0.79675	0.931833	0.395744	0.443818	0.552444	0.544616	0.636572	0.488015	0.678001	0.577669	0.676293	0.723596	0.777503	0.857094	0.848611	0.862463	0.801311	0.939918	0.392134	0.439416	0.581439	0.659778	0.777365	0.455262	0.743483	0.701918	0.827108	0.816227	0.767064	0.873577	0.846613	0.865928	0.789962	0.938989	0.0939344
163	0.395776	0.443517	0.482895	0.483025	0.566301	0.470961	0.634799	0.553694	0.609766	0.668419	0.767121	0.837627	0.844762	0.84453	0.796359	0.93159	0.395437	0.443498	0.552212	0.544158	0.636245	0.487614	0.677495	0.577238	0.675975	0.723177	0.776852	0.856833	0.848249	0.86207	0.800732	0.939741	0.391866	0.439075	0.581171	0.659527	0.777202	0.454799	0.743047	0.701522	0.826873	0.815751	0.766604	0.873212	0.846125	0.865573	0.789571	0.938745	0.093511
164	0.39538	0.443158	0.482569	0.482614	0.565991	0.470634	0.634395	0.553216	0.609162	0.66796	0.76659	0.837237	0.844246	0.844093	0.795872	0.93136	0.395095	0.443111	0.551891	0.543918	0.635908	0.487238	0.676835	0.576806	0.675666	0.722776	0.776417	0.856553	0.84772	0.8618	0.800242	0.939568	0.391435	0.438611	0.580897	0.659235	0.777	0.454298	0.742664	0.701142	0.826687	0.815393	0.766014	0.872891	0.845657	0.865175	0.789033	0.93853	0.0929592
165	0.395057	0.442745	0.482208	0.482291	0.565607	0.470151	0.633661	0.55278	0.608665	0.667647	0.766027	0.836975	0.843838	0.843715	0.795364	0.931092	0.394696	0.44271	0.551527	0.543593	0.63563	0.48678	0.67647	0.576293	0.675257	0.722369	0.775913	0.856257	0.847302	0.861345	0.799683	0.939384	0.391055	0.438152	0.58061	0.658975	0.776848	0.453779	0.7422	0.700869	0.826493	0.814841	0.765413	0.872569	0.845195	0.864892	0.788634	0.93828	0.0923786
166	0.394717	0.442152	0.481924	0.481884	0.565233	0.469745	0.633021	0.552235	0.608346	0.667123	0.76561	0.836673	0.843463	0.843337	0.794817	0.930852	0.394282	0.442106	0.551245	0.543269	0.635286	0.486266	0.675848	0.575823	0.674922	0.722018	0.77542	0.855985	0.846921	0.861031	0.799244	0.939226	0.390737	0.437744	0.580316	0.658621	0.77662	0.453293	0.741776	0.700592	0.826222	0.814473	0.764909	0.872272	0.844795	0.864412	0.788086	0.937889	0.0917343
167	0.3944	0.441782	0.481591	0.481529	0.564904	0.469388	0.632472	0.551973	0.607907	0.666426	0.765089	0.836317	0.843083	0.84304	0.794369	0.930585	0.394016	0.441684	0.550937	0.54294	0.635048	0.485866	0.675378	0.575368	0.674454	0.721539	0.775075	0.855721	0.846515	0.860672	0.798753	0.939009	0.390378	0.437399	0.580008	0.658337	0.776396	0.452792	0.741297	0.700293	0.82602	0.814125	0.764442	0.871941	0.844376	0.864	0.787435	0.937603	0.0912693
168	0.394065	0.441372	0.481115	0.481148	0.564656	0.468896	0.632029	0.551554	0.607621	0.666013	0.764644	0.836075	0.842714	0.84261	0.793918	0.930339	0.393741	0.441292	0.550625	0.542582	0.634795	0.485443	0.674881	0.574886	0.674129	0.721234	0.77464	0.855497	0.846035	0.860354	0.798198	0.938809	0.390032	0.436764	0.579621	0.658009	0.776104	0.452202	0.740935	0.699972	0.825743	0.813747	0.763913	0.871663	0.843857	0.863682	0.786891	0.937385	0.0908373
169	0.393774	0.440957	0.480765	0.480845	0.56443	0.468527	0.63153	0.550998	0.606997	0.665617	0.764179	0.835711	0.842285	0.842241	0.793498	0.930115	0.393445	0.440899	0.550389	0.542273	0.634532	0.485066	0.674396	0.574458	0.673753	0.720913	0.77409	0.855251	0.845557	0.85999	0.797879	0.93861	0.389695	0.436312	0.579312	0.657754	0.775882	0.451676	0.740546	0.699647	0.825502	0.813396	0.76341	0.871334	0.843293	0.863321	0.786336	0.937178	0.0904126
170	0.393404	0.440448	0.48046	0.480488	0.564061	0.468177	0.631074	0.550504	0.60655	0.665158	0.76381	0.835414	0.84186	0.841846	0.793084	0.929935	0.393143	0.440401	0.549999	0.541991	0.634295	0.48456	0.673827	0.574098	0.673404	0.720655	0.773663	0.85506	0.845026	0.859593	0.797448	0.938402	0.389353	0.435923	0.579029	0.657443	0.775698	0.451276	0.740095	0.699313	0.825309	0.813012	0.762978	0.871046	0.842822	0.863018	0.785851	0.936912	0.0898951
171	0.393006	0.440022	0.480237	0.480189	0.563554	0.467752	0.630589	0.55004	0.606147	0.664783	0.763379	0.835094	0.841415	0.841516	0.79262	0.929733	0.39287	0.439973	0.549692	0.541746	0.634046	0.484171	0.673368	0.573713	0.672967	0.720271	0.773271	0.854824	0.844665	0.85927	0.796925	0.938247	0.389015	0.43552	0.578741	0.65716	0.775446	0.45076	0.739601	0.699013	0.825043	0.81263	0.762378	0.870721	0.842334	0.862579	0.785285	0.936702	0.0894664
172	0.392764	0.4396	0.479943	0.479895	0.563229	0.467272	0.630101	0.549665	0.605593	0.664364	0.762945	0.834824	0.841039	0.841177	0.792082	0.929506	0.392603	0.439548	0.549374	0.541413	0.633816	0.483695	0.672939	0.573177	0.672626	0.719749	0.772798	0.854559	0.844162	0.858911	0.796545	0.937994	0.388718	0.435147	0.578448	0.656951	0.77526	0.450239	0.739253	0.698711	0.824778	0.812325	0.761844	0.870369	0.841863	0.862192	0.784771	0.936422	0.0891137
173	0.392447	0.439124	0.479712	0.479539	0.562881	0.466822	0.629658	0.549059	0.605113	0.664012	0.762597	0.834561	0.840599	0.840762	0.791508	0.929273	0.392353	0.439027	0.549016	0.541143	0.633496	0.483255	0.672407	0.572732	0.672267	0.719387	0.772412	0.854287	0.843786	0.858537	0.79617	0.937804	0.388374	0.434709	0.578201	0.656673	0.775063	0.44977	0.738701	0.698338	0.824555	0.812002	0.761331	0.869946	0.841397	0.861915	0.784243	0.936218	0.0887406
174	0.392148	0.438671	0.479327	0.479301	0.562577	0.466377	0.62918	0.548607	0.604638	0.663571	0.762293	0.834203	0.840175	0.84035	0.790896	0.929046	0.392023	0.438616	0.548732	0.540866	0.633132	0.482812	0.671929	0.572246	0.67199	0.719022	0.771904	0.854057	0.84336	0.8582	0.795808	0.9376	0.387959	0.434339	0.577894	0.656422	0.77489	0.449188	0.738227	0.698048	0.824328	0.811684	0.760891	0.869609	0.840894	0.861602	0.783773	0.935992	0.0883118
175	0.39176	0.438221	0.478973	0.47893	0.562284	0.465988	0.628675	0.548147	0.604226	0.663212	0.761902	0.833934	0.839889	0.840014	0.790572	0.928812	0.391653	0.438129	0.548481	0.540562	0.632847	0.482309	0.671481	0.571699	0.671601	0.718663	0.771357	0.853796	0.843049	0.857868	0.795258	0.937426	0.38765	0.433907	0.577602	0.656138	0.774651	0.448702	0.737759	0.697804	0.824145	0.811338	0.760253	0.869298	0.84034	0.86127	0.783196	0.93577	0.0878366
176	0.39149	0.437891	0.47863	0.478628	0.562004	0.465643	0.628284	0.547647	0.603896	0.662793	0.761445	0.833626	0.839558	0.839716	0.790196	0.928592	0.391389	0.437813	0.548207	0.540261	0.632505	0.481841	0.670978	0.571155	0.671219	0.718343	0.770948	0.853533	0.842661	0.857524	0.794895	0.937219	0.387361	0.433496	0.577375	0.655843	0.774464	0.44824	0.737382	0.697503	0.82394	0.810944	0.759801	0.868969	0.839754	0.860956	0.78264	0.935531	0.0873605
177	0.39109	0.437611	0.478355	0.478249	0.561729	0.465181	0.627893	0.547285	0.603423	0.66238	0.761014	0.833369	0.839032	0.839379	0.789747	0.928425	0.391048	0.437525	0.547963	0.539978	0.632132	0.4813	0.670545	0.570632	0.670789	0.71801	0.770558	0.853298	0.842162	0.857234	0.79443	0.937013	0.386923	0.433048	0.577155	0.655548	0.77429	0.447743	0.736752	0.697194	0.823805	0.810545	0.759364	0.868612	0.839308	0.860598	0.782083	0.935333	0.0868738
178	0.390835	0.437157	0.477977	0.477914	0.561376	0.464808	0.627489	0.546811	0.603076	0.661995	0.760499	0.833123	0.838647	0.838941	0.789417	0.928189	0.390732	0.437113	0.547668	0.539737	0.631877	0.480772	0.670051	0.570165	0.670443	0.717634	0.770132	0.853063	0.841752	0.856875	0.793943	0.936778	0.386727	0.432618	0.576797	0.655245	0.774079	0.447224	0.736294	0.696799	0.823621	0.810049	0.75891	0.868258	0.838685	0.860214	0.781581	0.93505	0.0863811
179	0.390404	0.436853	0.477683	0.477544	0.561023	0.464337	0.626904	0.546293	0.602712	0.661586	0.759992	0.832809	0.838348	0.838588	0.788949	0.928055	0.390277	0.436792	0.547412	0.539407	0.631629	0.480408	0.669566	0.569817	0.670003	0.717304	0.769705	0.852832	0.841423	0.856601	0.793489	0.936559	0.386353	0.432109	0.57654	0.654995	0.773939	0.446801	0.735804	0.696374	0.823404	0.809515	0.758499	0.867983	0.83821	0.859712	0.781203	0.934849	0.0857992
180	0.390145	0.436481	0.477346	0.477275	0.560802	0.463832	0.626366	0.54581	0.602389	0.661107	0.759616	0.83261	0.837969	0.838257	0.788492	0.927817	0.39001	0.436371	0.547125	0.539046	0.631387	0.480097	0.669037	0.569508	0.669577	0.716986	0.769309	0.852536	0.841083	0.856244	0.793005	0.936405	0.386109	0.431703	0.576167	0.65468	0.773699	0.446259	0.735424	0.695895	0.823222	0.809097	0.757896	0.867679	0.837731	0.859305	0.780658	0.934579	0.0853267
181	0.389867	0.43612	0.47699	0.4769	0.560501	0.463385	0.625939	0.545331	0.602002	0.660666	0.759284	0.832275	0.837513	0.837922	0.788077	0.927569	0.389794	0.436055	0.546823	0.538699	0.631128	0.479639	0.66839	0.568972	0.669222	0.716588	0.769014	0.852237	0.840658	0.855929	0.792585	0.936269	0.385764	0.431228	0.575873	0.654359	0.773562	0.445785	0.735123	0.695617	0.822962	0.808693	0.757328	0.867486	0.837387	0.858983	0.780172	0.934351	0.0849846
182	0.389549	0.435738	0.476734	0.476573	0.560219	0.462976	0.625514	0.544878	0.601617	0.66036	0.758932	0.832086	0.837124	0.837547	0.787656	0.927376	0.389522	0.435673	0.546576	0.538303	0.630762	0.479227	0.667871	0.568535	0.668786	0.716222	0.768669	0.851955	0.840401	0.855585	0.79219	0.93607	0.385345	0.430806	0.575583	0.654095	0.773342	0.445426	0.734719	0.695329	0.822744	0.808289	0.756812	0.867134	0.836942	0.858581	0.779607	0.934112	0.0846022
183	0.389279	0.43544	0.476419	0.476238	0.559862	0.462592	0.625054	0.544439	0.601201	0.660038	0.758523	0.831759	0.836689	0.83702	0.787139	0.927073	0.389346	0.435326	0.546282	0.537998	0.630466	0.478793	0.667367	0.568079	0.668416	0.715877	0.768197	0.851607	0.840101	0.855221	0.791803	0.935868	0.385014	0.430434	0.575286	0.653806	0.773169	0.445006	0.734293	0.695061	0.822547	0.807888	0.756358	0.866882	0.836502	0.858152	0.779104	0.933854	0.0842715
184	0.388925	0.435066	0.476181	0.475883	0.559607	0.462276	0.624633	0.544027	0.600879	0.659617	0.758121	0.831447	0.83631	0.8365	0.786602	0.926856	0.389067	0.434991	0.54604	0.537744	0.630269	0.478422	0.666883	0.567622	0.66797	0.715594	0.767657	0.851372	0.839727	0.854902	0.791479	0.935674	0.384677	0.430016	0.575012	0.653466	0.772929	0.444517	0.733975	0.694746	0.822314	0.807527	0.75592	0.866547	0.836133	0.857849	0.778684	0.93362	0.0838251
185	0.388646	0.434695	0.475848	0.475481	0.559266	0.461838	0.62419	0.543572	0.600374	0.659101	0.757704	0.831123	0.835925	0.836225	0.786278	0.926614	0.388816	0.434638	0.545811	0.53741	0.629955	0.477932	0.666354	0.567098	0.667614	0.715202	0.767367	0.851031	0.839406	0.854526	0.79086	0.935427	0.384386	0.429659	0.574718	0.653205	0.772768	0.44396	0.733675	0.694403	0.822104	0.807222	0.755268	0.866306	0.835883	0.857542	0.778268	0.933352	0.0834913
186	0.388288	0.434295	0.475512	0.475067	0.558969	0.461518	0.623674	0.543188	0.600065	0.658675	0.757312	0.830893	0.835415	0.835753	0.78598	0.926436	0.388472	0.434249	0.545485	0.537075	0.629739	0.477508	0.66597	0.566724	0.667284	0.714775	0.766933	0.850802	0.839011	0.854304	0.790484	0.935167	0.384031	0.429273	0.574386	0.652849	0.772611	0.443462	0.733342	0.694045	0.821891	0.80671	0.754599	0.866002	0.835329	0.857222	0.777676	0.933111	0.0830358
187	0.387856	0.433802	0.475242	0.47483	0.558683	0.461097	0.623277	0.542731	0.599579	0.658427	0.756897	0.830612	0.83506	0.835494	0.785509	0.926203	0.388198	0.433717	0.545204	0.53678	0.62943	0.476951	0.665578	0.566165	0.666972	0.714422	0.766511	0.850553	0.838598	0.853861	0.789911	0.934989	0.383644	0.428981	0.574067	0.652591	0.772383	0.442824	0.732878	0.69375	0.821645	0.806281	0.754253	0.86567	0.834891	0.856864	0.777067	0.932866	0.0827219
188	0.387604	0.433414	0.474877	0.47441	0.558327	0.460585	0.622621	0.542396	0.599235	0.657722	0.756534	0.830409	0.834686	0.835187	0.78512	0.92593	0.387938	0.433323	0.544973	0.536407	0.629101	0.476591	0.665184	0.565776	0.666637	0.714162	0.766075	0.850276	0.838044	0.853491	0.789423	0.934784	0.383371	0.428628	0.573763	0.652315	0.772219	0.442411	0.732465	0.693447	0.821414	0.805806	0.753741	0.865368	0.834517	0.856525	0.776475	0.932637	0.0822592
189	0.387317	0.433145	0.474575	0.47407	0.557981	0.460245	0.622074	0.541997	0.598772	0.657275	0.756105	0.830119	0.834272	0.834843	0.784691	0.9257	0.38759	0.433053	0.544696	0.536128	0.628833	0.476101	0.664776	0.5654	0.666243	0.713783	0.765591	0.850024	0.837658	0.853197	0.789029	0.93464	0.383039	0.428285	0.573509	0.652101	0.772023	0.442025	0.731881	0.693143	0.821195	0.805412	0.753265	0.865122	0.834051	0.856142	0.776109	0.932385	0.0817559
190	0.387005	0.432713	0.474201	0.473708	0.557665	0.459767	0.621692	0.541588	0.598329	0.656873	0.755717	0.829872	0.83394	0.834452	0.784239	0.925467	0.387263	0.432593	0.544394	0.53587	0.628555	0.475749	0.664343	0.564959	0.665976	0.713482	0.765065	0.849782	0.837267	0.852848	0.788618	0.934428	0.382661	0.428025	0.573233	0.651747	0.77184	0.441575	0.731417	0.69279	0.820977	0.805067	0.752794	0.864855	0.833481	0.855719	0.775673	0.932023	0.0813176
191	0.386697	0.432359	0.473971	0.473381	0.55748	0.45942	0.621248	0.54102	0.598006	0.656562	0.755323	0.82962	0.833549	0.834094	0.783839	0.925258	0.387016	0.432235	0.544127	0.535566	0.628262	0.475269	0.663884	0.564621	0.665657	0.71325	0.764715	0.849574	0.836981	0.852535	0.788225	0.934249	0.382415	0.427587	0.572888	0.651524	0.771639	0.441053	0.730925	0.692552	0.820784	0.804724	0.752242	0.864575	0.83297	0.85538	0.775195	0.931787	0.0809017
192	0.386394	0.432013	0.473687	0.473016	0.557129	0.458997	0.620738	0.540654	0.597622	0.656184	0.754867	0.829481	0.833256	0.833812	0.783341	0.925046	0.386761	0.431919	0.543853	0.535273	0.627973	0.474834	0.663457	0.564075	0.665349	0.712888	0.764312	0.849381	0.836572	0.85216	0.787716	0.934047	0.382088	0.427097	0.572633	0.651253	0.771452	0.440615	0.730469	0.692171	0.820608	0.804315	0.751784	0.864269	0.832632	0.854815	0.774674	0.931532	0.0805236
193	0.386181	0.431643	0.473428	0.472695	0.556929	0.45854	0.620287	0.540205	0.597243	0.655843	0.754455	0.829173	0.832864	0.833432	0.783029	0.924771	0.386421	0.431567	0.543574	0.535021	0.627703	0.474448	0.663023	0.563659	0.665087	0.712598	0.763876	0.849055	0.836161	0.851942	0.78728	0.933846	0.38181	0.426688	0.572387	0.650979	0.771299	0.440198	0.730237	0.691877	0.820422	0.803972	0.751334	0.863851	0.832298	0.854524	0.774292	0.931263	0.0799154
194	0.385877	0.431252	0.473128	0.472382	0.556629	0.458296	0.619866	0.539857	0.596887	0.655609	0.754102	0.828958	0.832409	0.833156	0.782619	0.924658	0.386043	0.431148	0.543316	0.534766	0.627512	0.473986	0.662484	0.563128	0.664786	0.712329	0.763439	0.84882	0.835767	0.851601	0.786882	0.933682	0.381495	0.426278	0.572109	0.650715	0.771121	0.439761	0.729835	0.691603	0.820207	0.80353	0.750753	0.863592	0.831802	0.854081	0.77373	0.931022	0.0794314
195	0.385538	0.430966	0.472804	0.471994	0.556307	0.457948	0.619315	0.539445	0.596384	0.655197	0.753842	0.828648	0.831992	0.832912	0.782185	0.92445	0.385726	0.43079	0.543093	0.534551	0.627226	0.473691	0.661998	0.56272	0.66447	0.711894	0.762995	0.848567	0.835364	0.851237	0.786568	0.933451	0.381236	0.425887	0.571836	0.65041	0.770938	0.439233	0.729443	0.69129	0.81994	0.803107	0.750394	0.863243	0.831279	0.853743	0.77318	0.930743	0.0790122
196	0.385198	0.430516	0.472494	0.47174	0.555946	0.457546	0.618818	0.539004	0.595974	0.654765	0.753415	0.828359	0.83155	0.832412	0.781782	0.924227	0.385306	0.430387	0.542738	0.534264	0.626957	0.473376	0.661515	0.562216	0.664185	0.711476	0.76253	0.848342	0.835073	0.85088	0.786118	0.933259	0.380897	0.425448	0.571577	0.650176	0.770719	0.438837	0.728938	0.690971	0.819739	0.802696	0.749967	0.862975	0.83073	0.853411	0.77262	0.930574	0.07859
197	0.384838	0.430074	0.472165	0.471466	0.555577	0.45712	0.618369	0.538554	0.595638	0.654481	0.753106	0.828114	0.831084	0.831989	0.781345	0.92402	0.38503	0.429953	0.542521	0.534003	0.626735	0.472992	0.661087	0.561761	0.663854	0.711173	0.762083	0.848068	0.834731	0.85051	0.785737	0.933041	0.380613	0.424977	0.571373	0.649908	0.770555	0.438284	0.728609	0.690647	0.81949	0.802158	0.74946	0.862631	0.830282	0.853037	0.772174	0.930391	0.0781399
198	0.384586	0.429704	0.471844	0.471216	0.555181	0.456762	0.617952	0.538014	0.595265	0.654119	0.752672	0.827875	0.830724	0.831687	0.781026	0.923855	0.384822	0.429613	0.542222	0.533727	0.626447	0.472595	0.660701	0.561262	0.663449	0.710685	0.761622	0.847825	0.834362	0.850205	0.785399	0.932862	0.380308	0.424631	0.571182	0.649655	0.77034	0.437821	0.728294	0.690371	0.819248	0.801812	0.748989	0.862318	0.829745	0.852675	0.771815	0.930119	0.0776589
199	0.38419	0.429341	0.471602	0.470934	0.55488	0.456365	0.61752	0.537501	0.594938	0.653754	0.752341	0.827597	0.830304	0.831402	0.780605	0.923678	0.384473	0.42921	0.541915	0.533414	0.626195	0.47223	0.660204	0.560812	0.663142	0.710317	0.761238	0.847583	0.833956	0.849768	0.784991	0.932682	0.38	0.42433	0.570853	0.649359	0.770121	0.437407	0.727916	0.690121	0.819006	0.80139	0.748533	0.862034	0.829284	0.852234	0.771462	0.92986	0.0772475
200	0.383905	0.429076	0.471314	0.470576	0.554564	0.456015	0.617014	0.536953	0.594595	0.653327	0.751939	0.827346	0.829928	0.83104	0.780102	0.923449	0.384258	0.428948	0.541649	0.533107	0.625861	0.471865	0.659752	0.560434	0.662773	0.710001	0.760842	0.847297	0.833557	0.849523	0.784697	0.932484	0.379762	0.423981	0.570623	0.649057	0.769943	0.437017	0.727534	0.689896	0.818824	0.801019	0.748175	0.861747	0.828935	0.851744	0.770937	0.929731	0.0769008
201	0.383587	0.428711	0.471054	0.470225	0.554185	0.455615	0.616521	0.53664	0.594273	0.652998	0.751594	0.827069	0.829584	0.830688	0.779762	0.923218	0.383978	0.428556	0.541352	0.532777	0.625598	0.471447	0.659296	0.560086	0.662479	0.709695	0.760411	0.847107	0.833128	0.849238	0.784404	0.932283	0.379399	0.423665	0.570347	0.648802	0.769699	0.43663	0.727118	0.689687	0.81863	0.800589	0.74767	0.861428	0.828506	0.851403	0.770447	0.929497	0.0763816
202	0.383326	0.428427	0.470827	0.469937	0.553868	0.455272	0.61603	0.536155	0.593902	0.652704	0.75109	0.826838	0.829253	0.830355	0.779378	0.923004	0.38372	0.428225	0.541127	0.532512	0.625358	0.471072	0.658931	0.559678	0.662144	0.709342	0.760119	0.846884	0.832793	0.848829	0.784031	0.932082	0.379087	0.42329	0.570097	0.648538	0.769513	0.436196	0.72668	0.689375	0.818443	0.800204	0.747153	0.861151	0.828008	0.850982	0.770057	0.929302	0.0759927
203	0.383005	0.428013	0.47062	0.469646	0.553426	0.45494	0.615554	0.535742	0.593504	0.65238	0.750671	0.826589	0.828916	0.830086	0.778905	0.922785	0.383381	0.427859	0.5409	0.532314	0.625126	0.470693	0.658509	0.559248	0.6618	0.708945	0.759656	0.846574	0.832422	0.848516	0.783583	0.931909	0.3787	0.422961	0.569881	0.648151	0.769338	0.43577	0.726325	0.689075	0.818212	0.79975	0.746703	0.860838	0.8276	0.850671	0.769575	0.929047	0.0754766
204	0.3826	0.427631	0.470339	0.469293	0.553188	0.454552	0.615078	0.535314	0.593201	0.652035	0.750228	0.826306	0.828582	0.829778	0.778557	0.922539	0.383084	0.427507	0.54068	0.532087	0.624854	0.470265	0.658108	0.558839	0.661523	0.70857	0.759275	0.846352	0.832038	0.848276	0.78311	0.931688	0.378331	0.422487	0.569556	0.647901	0.76917	0.435217	0.72592	0.688692	0.817914	0.799429	0.746362	0.860511	0.827125	0.850252	0.769158	0.928817	0.0750613
205	0.382378	0.427268	0.47007	0.469025	0.552839	0.454192	0.614639	0.534904	0.592828	0.651651	0.749826	0.826038	0.828267	0.829425	0.778185	0.92235	0.382811	0.427123	0.54039	0.531787	0.624567	0.469889	0.65764	0.558504	0.661245	0.708345	0.758805	0.846137	0.831724	0.847949	0.782798	0.931534	0.377985	0.422186	0.569306	0.6476	0.768988	0.434844	0.725404	0.688357	0.817741	0.799029	0.745867	0.86018	0.826762	0.849967	0.768679	0.928571	0.0746757
206	0.382167	0.426836	0.469778	0.468771	0.552485	0.453853	0.61411	0.534455	0.592444	0.651329	0.749353	0.825763	0.827962	0.829096	0.777729	0.9221	0.382527	0.42668	0.540145	0.531496	0.624276	0.469481	0.65713	0.558031	0.660948	0.708041	0.758473	0.845841	0.831281	0.847636	0.782287	0.931397	0.377733	0.421809	0.569015	0.647306	0.768834	0.434401	0.724943	0.688125	0.817493	0.798726	0.745491	0.859913	0.826335	0.849596	0.768214	0.928361	0.0742389
207	0.38176	0.426526	0.469561	0.468449	0.552169	0.453433	0.613747	0.534038	0.591978	0.650862	0.748973	0.82547	0.827572	0.828693	0.777341	0.921846	0.382347	0.426395	0.539921	0.531309	0.624007	0.469046	0.656662	0.557661	0.660556	0.707709	0.758195	0.845562	0.830881	0.847309	0.781884	0.931201	0.377439	0.421445	0.568735	0.647068	0.768678	0.433967	0.724612	0.687886	0.817304	0.798222	0.745061	0.859625	0.825853	0.849238	0.767907	0.928155	0.0738946
208	0.381474	0.426154	0.469254	0.468074	0.551955	0.453083	0.612979	0.533629	0.591643	0.650457	0.748548	0.825226	0.827174	0.828322	0.777059	0.921623	0.382027	0.426072	0.539668	0.531025	0.623707	0.468729	0.656214	0.557182	0.660187	0.707455	0.757627	0.845363	0.830384	0.847018	0.781537	0.930958	0.377221	0.421053	0.568481	0.646853	0.768462	0.433558	0.724267	0.687661	0.817062	0.797837	0.744644	0.859329	0.825406	0.848929	0.76755	0.927933	0.0733618
209	0.381206	0.425789	0.469053	0.467784	0.551676	0.45284	0.612568	0.533132	0.591295	0.650135	0.748034	0.82494	0.826807	0.827997	0.776652	0.921483	0.38174	0.425663	0.539401	0.530766	0.623426	0.46832	0.655744	0.556801	0.659783	0.707101	0.757262	0.845097	0.830001	0.846711	0.781129	0.930718	0.376919	0.420682	0.568239	0.646558	0.768338	0.433184	0.723762	0.687439	0.816863	0.797376	0.744247	0.859075	0.82488	0.848568	0.767174	0.927632	0.0729817
210	0.380886	0.42544	0.468705	0.467488	0.551343	0.452378	0.61214	0.532776	0.590868	0.649767	0.7477	0.824686	0.826459	0.827668	0.77624	0.921312	0.381458	0.425286	0.539112	0.530442	0.6232	0.467938	0.655164	0.556367	0.659484	0.706652	0.75688	0.844819	0.829486	0.846361	0.780736	0.930533	0.37668	0.420311	0.567974	0.646299	0.768122	0.432715	0.723394	0.687183	0.816669	0.797011	0.743834	0.858791	0.824423	0.848167	0.76673	0.927404	0.0726003
211	0.380553	0.425147	0.468472	0.467154	0.551055	0.451985	0.611697	0.532295	0.590366	0.649384	0.747229	0.824508	0.826139	0.827309	0.775876	0.921095	0.381236	0.425062	0.538928	0.530153	0.622933	0.467577	0.654702	0.555919	0.659145	0.706386	0.756439	0.844613	0.828963	0.84606	0.780355	0.930338	0.376427	0.420075	0.567721	0.646085	0.767912	0.432103	0.722983	0.686777	0.816449	0.796602	0.743402	0.858522	0.823956	0.847825	0.766298	0.927179	0.0722107
212	0.380196	0.424834	0.468168	0.466814	0.550727	0.451572	0.611117	0.532022	0.590045	0.649047	0.746673	0.824318	0.825752	0.827035	0.775499	0.920879	0.380989	0.424724	0.53864	0.529894	0.622628	0.467209	0.65424	0.55548	0.658922	0.706078	0.756052	0.844321	0.828479	0.845741	0.779974	0.930143	0.376169	0.419818	0.567481	0.64585	0.767723	0.431719	0.722645	0.686454	0.816259	0.796189	0.743023	0.858213	0.823607	0.84749	0.765871	0.926861	0.0718662
213	0.379932	0.424458	0.467883	0.466577	0.550364	0.451234	0.610627	0.531548	0.589611	0.648765	0.746346	0.823981	0.825355	0.826683	0.775088	0.920657	0.380732	0.424398	0.538359	0.529636	0.622402	0.466748	0.653659	0.554925	0.6586	0.705709	0.755663	0.844075	0.828088	0.845366	0.779616	0.929954	0.375872	0.419493	0.567207	0.64553	0.767554	0.43138	0.722225	0.686131	0.816039	0.795818	0.742644	0.857902	0.823257	0.847156	0.765344	0.926621	0.0714552
214	0.379693	0.4242	0.46762	0.466228	0.550075	0.45087	0.61014	0.531202	0.589323	0.648484	0.745999	0.823737	0.824963	0.826339	0.774753	0.920486	0.380558	0.424118	0.538102	0.52934	0.622123	0.466369	0.653125	0.554482	0.658311	0.705401	0.75521	0.843884	0.82772	0.845048	0.779096	0.929771	0.375541	0.419116	0.567012	0.645231	0.767428	0.431022	0.72184	0.685878	0.815802	0.795488	0.74225	0.857574	0.822936	0.846853	0.764928	0.926381	0.0711674
215	0.379416	0.42392	0.467382	0.465892	0.549883	0.450502	0.609748	0.530844	0.589056	0.648079	0.745476	0.823451	0.824585	0.826053	0.774458	0.920279	0.380257	0.423765	0.537854	0.529105	0.621891	0.465977	0.6528	0.554097	0.658079	0.705098	0.754828	0.843624	0.827195	0.844755	0.778687	0.929548	0.375253	0.418782	0.566741	0.644966	0.76725	0.430619	0.721464	0.685582	0.815625	0.795139	0.741892	0.857297	0.822333	0.846465	0.76434	0.926095	0.0707719
216	0.37919	0.423479	0.467191	0.465568	0.549651	0.450151	0.609436	0.530366	0.588594	0.647864	0.745124	0.823201	0.824282	0.825689	0.774046	0.920053	0.380033	0.423397	0.537539	0.528744	0.621622	0.465691	0.652236	0.553703	0.657813	0.70473	0.754399	0.843362	0.826808	0.844504	0.77833	0.929364	0.37489	0.418485	0.566453	0.644749	0.767042	0.430121	0.721164	0.685362	0.815324	0.794699	0.74158	0.857024	0.82188	0.846116	0.763721	0.925819	0.0703864
217	0.378868	0.423223	0.46689	0.465213	0.549409	0.449793	0.609001	0.529928	0.588196	0.647513	0.744667	0.822929	0.823971	0.825357	0.773689	0.919858	0.379752	0.423061	0.537354	0.528401	0.621397	0.465312	0.651853	0.553292	0.657464	0.704429	0.753856	0.843061	0.826466	0.84412	0.77801	0.929113	0.374669	0.418144	0.566162	0.644521	0.766868	0.429828	0.720854	0.685109	0.815096	0.79431	0.741241	0.856721	0.821335	0.845742	0.763241	0.925583	0.0699869
218	0.378534	0.422912	0.466567	0.464994	0.549138	0.449499	0.608596	0.529499	0.587769	0.647134	0.744297	0.822667	0.823525	0.825018	0.773395	0.919633	0.379439	0.422758	0.537099	0.528165	0.621167	0.464966	0.651454	0.552914	0.657143	0.70416	0.753583	0.842803	0.826071	0.843861	0.777621	0.928898	0.374422	0.417821	0.565895	0.644213	0.766695	0.429461	0.720472	0.684799	0.814908	0.794014	0.740835	0.856389	0.820793	0.845441	0.762673	0.92537	0.0695951
219	0.378162	0.422556	0.466304	0.464715	0.548825	0.449199	0.608185	0.529077	0.587409	0.646812	0.743874	0.822419	0.823089	0.824782	0.773091	0.919332	0.379129	0.422402	0.536808	0.527955	0.620825	0.464509	0.650936	0.552384	0.65688	0.703872	0.753259	0.842486	0.825705	0.843597	0.777133	0.928695	0.37409	0.417461	0.565682	0.643878	0.766513	0.429025	0.720102	0.684473	0.814694	0.793531	0.740357	0.856131	0.820336	0.845151	0.762172	0.925101	0.0691066
220	0.377923	0.422253	0.466069	0.464423	0.548552	0.44882	0.607662	0.528681	0.586781	0.646435	0.743371	0.822148	0.822762	0.824479	0.772696	0.919062	0.378851	0.42213	0.536538	0.527642	0.620543	0.464182	0.650493	0.552054	0.656512	0.703429	0.752738	0.842204	0.825398	0.843388	0.77672	0.928496	0.373813	0.417143	0.565393	0.643612	0.766349	0.428529	0.719637	0.684221	0.814492	0.79322	0.740033	0.85586	0.819875	0.844797	0.761799	0.924825	0.0687234
221	0.377676	0.421915	0.465764	0.464143	0.548175	0.448399	0.607218	0.528278	0.586483	0.646019	0.742989	0.821869	0.822419	0.824153	0.772307	0.918913	0.378609	0.42178	0.536335	0.527408	0.620314	0.463778	0.650169	0.551761	0.656294	0.703115	0.752409	0.841895	0.825062	0.84308	0.776365	0.928281	0.373541	0.416773	0.565118	0.643347	0.766152	0.428157	0.719105	0.683879	0.814318	0.792672	0.739547	0.855547	0.819406	0.844428	0.761378	0.924625	0.0683226
222	0.377361	0.421672	0.465496	0.463825	0.547914	0.448108	0.606734	0.527809	0.586139	0.645709	0.742635	0.821638	0.822079	0.823794	0.771956	0.918723	0.378363	0.42153	0.536034	0.527121	0.62007	0.46344	0.649694	0.551353	0.655986	0.70278	0.751994	0.841634	0.824683	0.842854	0.776	0.928087	0.373138	0.416413	0.56491	0.643074	0.765978	0.427744	0.718837	0.683557	0.814078	0.792371	0.739077	0.85525	0.818969	0.844145	0.760971	0.924408	0.0679816
223	0.377032	0.421295	0.465203	0.463521	0.547533	0.447725	0.606451	0.527377	0.585745	0.645418	0.742212	0.821424	0.821746	0.823392	0.771636	0.918499	0.378086	0.421131	0.535778	0.526815	0.619804	0.463082	0.649214	0.550978	0.655741	0.702543	0.751621	0.841385	0.824291	0.842554	0.775624	0.927914	0.372857	0.416069	0.564614	0.642844	0.765851	0.427229	0.718496	0.683292	0.813843	0.792003	0.738714	0.854898	0.818535	0.843898	0.760501	0.924153	0.0674807
224	0.376783	0.420945	0.465005	0.463181	0.547185	0.447315	0.606052	0.527009	0.585398	0.644999	0.741882	0.821168	0.821335	0.823142	0.77121	0.918267	0.377801	0.420771	0.535516	0.526483	0.619519	0.462755	0.648833	0.550522	0.655434	0.702262	0.751272	0.841162	0.823972	0.842293	0.775233	0.927749	0.372537	0.41578	0.564422	0.642561	0.765731	0.426818	0.718045	0.683049	0.813685	0.791618	0.738313	0.854566	0.81804	0.843623	0.760024	0.923959	0.0671405
225	0.376469	0.420646	0.464798	0.462906	0.546897	0.446851	0.605586	0.52663	0.585096	0.644683	0.741569	0.820881	0.820982	0.822876	0.770828	0.918017	0.377348	0.420489	0.535257	0.52618	0.619277	0.462341	0.648312	0.54995	0.655248	0.701902	0.750966	0.840923	0.823557	0.841976	0.774923	0.927419	0.372304	0.415456	0.564085	0.642375	0.765532	0.426416	0.717767	0.682714	0.813489	0.791289	0.7378	0.854318	0.817648	0.843239	0.759662	0.923643	0.0665571
226	0.376199	0.42034	0.464491	0.462636	0.546729	0.446471	0.605052	0.526297	0.58473	0.644337	0.741233	0.820648	0.820584	0.822576	0.770419	0.917846	0.37711	0.420205	0.535013	0.525981	0.619053	0.462057	0.64785	0.549493	0.654948	0.701605	0.750536	0.840706	0.823312	0.841681	0.774501	0.92723	0.372017	0.415043	0.563858	0.642047	0.765289	0.426065	0.717463	0.682476	0.813243	0.790766	0.737184	0.85408	0.817282	0.84285	0.759264	0.923443	0.0661624
227	0.376009	0.419944	0.46423	0.46244	0.546439	0.446048	0.604704	0.5259	0.584389	0.644052	0.740904	0.820349	0.820274	0.822282	0.77015	0.917663	0.37695	0.419805	0.53471	0.525765	0.618844	0.461627	0.647376	0.549027	0.654649	0.701266	0.750066	0.840454	0.822885	0.841305	0.774216	0.927067	0.371719	0.4147	0.563602	0.641767	0.765102	0.425725	0.717175	0.682187	0.813032	0.790491	0.736626	0.853761	0.816934	0.842511	0.75888	0.923148	0.0658356
228	0.375678	0.419669	0.463976	0.462169	0.546168	0.445761	0.604389	0.525512	0.583867	0.643679	0.740364	0.820068	0.81986	0.821948	0.769897	0.917444	0.37664	0.419553	0.534396	0.525533	0.61861	0.461356	0.646928	0.548572	0.654368	0.700932	0.749569	0.84021	0.822389	0.840944	0.773843	0.926903	0.371393	0.41439	0.563393	0.64143	0.764849	0.425341	0.71686	0.681894	0.812841	0.790167	0.736098	0.853444	0.81656	0.842116	0.758482	0.922879	0.0654173
229	0.375365	0.419357	0.463726	0.461931	0.545823	0.445292	0.603873	0.525172	0.583536	0.643208	0.740101	0.819824	0.819426	0.821599	0.769572	0.917259	0.376412	0.41925	0.534108	0.525268	0.618282	0.460981	0.646421	0.548213	0.654054	0.70062	0.749243	0.839914	0.822039	0.840585	0.773491	0.926722	0.371098	0.414018	0.563189	0.641129	0.764663	0.425017	0.716389	0.681687	0.812623	0.789738	0.735724	0.853088	0.816093	0.841742	0.75805	0.922686	0.0650404
230	0.375106	0.419085	0.463468	0.461649	0.545619	0.444883	0.603468	0.524778	0.583241	0.642765	0.739713	0.81958	0.819092	0.821235	0.769226	0.917013	0.376074	0.418912	0.533873	0.524978	0.618101	0.460564	0.646059	0.547745	0.65371	0.700319	0.748813	0.839602	0.8218	0.840293	0.773051	0.926575	0.370865	0.41371	0.562889	0.6409	0.764533	0.424615	0.715888	0.681474	0.812408	0.789337	0.735364	0.852842	0.815698	0.841464	0.757632	0.922483	0.0645891
231	0.374819	0.418685	0.463137	0.461368	0.545275	0.444554	0.603041	0.52444	0.582908	0.642372	0.739395	0.819344	0.818785	0.82091	0.768873	0.916758	0.375823	0.418502	0.533637	0.524733	0.61793	0.460242	0.645635	0.547354	0.653395	0.700009	0.748424	0.83938	0.821351	0.840022	0.772712	0.926405	0.370643	0.413421	0.562636	0.640623	0.764369	0.42425	0.715585	0.681231	0.812265	0.78898	0.73502	0.85255	0.81525	0.84102	0.757278	0.922297	0.0642477
232	0.374515	0.418393	0.462849	0.461124	0.544988	0.443992	0.602635	0.523919	0.582542	0.64204	0.739007	0.819074	0.81841	0.82057	0.768566	0.916568	0.375565	0.418202	0.533428	0.524459	0.617724	0.459891	0.644969	0.54683	0.653011	0.699609	0.748066	0.839152	0.820952	0.839731	0.772331	0.926222	0.370428	0.413188	0.562337	0.64037	0.764226	0.423863	0.715254	0.680967	0.812095	0.788477	0.734551	0.85222	0.814785	0.840613	0.756911	0.922079	0.0638554
233	0.37414	0.418193	0.462606	0.460836	0.54461	0.443737	0.602158	0.523545	0.582175	0.641692	0.738558	0.818838	0.818034	0.820312	0.768183	0.916341	0.375293	0.41802	0.533223	0.524104	0.617463	0.459526	0.644493	0.54649	0.652726	0.699272	0.74774	0.838941	0.820596	0.839449	0.771868	0.926063	0.370179	0.412857	0.562085	0.640082	0.764035	0.423528	0.715012	0.680717	0.811856	0.788186	0.734125	0.851969	0.814341	0.840297	0.756418	0.921901	0.063444
234	0.373957	0.417925	0.462359	0.460597	0.544303	0.443429	0.601741	0.523243	0.581934	0.641267	0.738241	0.8186	0.817665	0.819973	0.767844	0.916128	0.375037	0.417751	0.532968	0.523839	0.61718	0.459149	0.644116	0.546096	0.652428	0.698785	0.747376	0.83868	0.82026	0.839084	0.771527	0.925835	0.369909	0.41242	0.561748	0.63987	0.763772	0.423088	0.714624	0.680418	0.811673	0.78772	0.733789	0.851708	0.814003	0.839992	0.755932	0.921595	0.0629738
235	0.373731	0.417589	0.46209	0.460337	0.543896	0.443091	0.601337	0.52292	0.581611	0.640907	0.737861	0.818401	0.817295	0.819716	0.767452	0.915887	0.374808	0.417342	0.532753	0.523501	0.616947	0.458753	0.643737	0.545743	0.652191	0.698473	0.747037	0.838396	0.81991	0.83878	0.771214	0.925661	0.369592	0.412104	0.561504	0.639659	0.763593	0.422637	0.714297	0.680096	0.811452	0.787338	0.733309	0.851463	0.813654	0.839724	0.755515	0.921369	0.0626626
236	0.373529	0.41734	0.46172	0.459988	0.543615	0.442733	0.600921	0.522583	0.581332	0.640616	0.737533	0.818146	0.816918	0.819435	0.767085	0.915651	0.374576	0.417106	0.532513	0.523196	0.616708	0.458362	0.643262	0.545391	0.651877	0.698279	0.746669	0.838174	0.819574	0.838478	0.77078	0.925484	0.369311	0.41172	0.561246	0.639351	0.763422	0.422161	0.713962	0.679869	0.811269	0.78701	0.732951	0.8512	0.813215	0.839485	0.755171	0.921139	0.0622932
237	0.373291	0.41701	0.461435	0.459704	0.543345	0.442391	0.600439	0.522279	0.581018	0.640316	0.737213	0.817901	0.816622	0.819107	0.76663	0.91547	0.374321	0.416793	0.532276	0.522898	0.61648	0.457948	0.64282	0.545014	0.651523	0.697915	0.746362	0.837896	0.819105	0.838144	0.770452	0.925267	0.369056	0.411383	0.561019	0.639045	0.763236	0.421791	0.713548	0.679569	0.81106	0.786646	0.732586	0.850936	0.812731	0.839164	0.754759	0.920902	0.061895
238	0.372996	0.416712	0.461169	0.459476	0.543072	0.441956	0.599968	0.521889	0.580696	0.639971	0.736827	0.817627	0.816252	0.818755	0.766245	0.915205	0.374014	0.416513	0.532051	0.522633	0.61621	0.457628	0.642484	0.544651	0.651122	0.697522	0.745898	0.837707	0.818804	0.837917	0.770039	0.925094	0.368837	0.411058	0.560758	0.638833	0.763048	0.4214	0.713149	0.679301	0.810836	0.786332	0.732255	0.850669	0.812314	0.838836	0.754379	0.920657	0.061522
239	0.372731	0.416354	0.46095	0.459217	0.542858	0.441621	0.599545	0.521362	0.580365	0.63971	0.736422	0.81738	0.816001	0.818441	0.765859	0.915004	0.373744	0.416221	0.531882	0.522397	0.615866	0.457232	0.641978	0.544225	0.650857	0.697221	0.745539	0.837448	0.81842	0.837612	0.769724	0.924908	0.368547	0.410763	0.560502	0.638643	0.762915	0.420954	0.712697	0.679059	0.81062	0.785878	0.731913	0.850428	0.811998	0.838507	0.753878	0.920489	0.0611009
240	0.372505	0.416108	0.460738	0.458985	0.542551	0.441338	0.599159	0.520877	0.579997	0.639395	0.735993	0.817134	0.815609	0.818007	0.765387	0.914819	0.37351	0.415992	0.531641	0.522169	0.615634	0.456865	0.641608	0.543879	0.650612	0.696921	0.745251	0.837196	0.818087	0.837287	0.769449	0.924715	0.368307	0.410407	0.560284	0.638347	0.762778	0.420542	0.712289	0.678769	0.810424	0.785444	0.731482	0.850187	0.811521	0.838215	0.753374	0.920292	0.060698
241	0.372263	0.415882	0.460536	0.458746	0.542305	0.44101	0.598835	0.520524	0.579705	0.639132	0.735679	0.816833	0.815232	0.817752	0.765138	0.914629	0.373274	0.415781	0.531454	0.521963	0.615417	0.456597	0.641162	0.543539	0.650278	0.696548	0.74483	0.836945	0.817616	0.836948	0.769072	0.924554	0.368122	0.409972	0.559981	0.63814	0.762621	0.420233	0.711868	0.678545	0.81028	0.784993	0.730955	0.849959	0.811266	0.837857	0.752978	0.920102	0.0603614
242	0.37203	0.415636	0.460317	0.458538	0.542083	0.440712	0.598445	0.520222	0.57923	0.638764	0.735319	0.816636	0.814813	0.817524	0.764816	0.914461	0.373007	0.415526	0.531206	0.521689	0.615218	0.456245	0.64074	0.543135	0.650014	0.696289	0.744552	0.836736	0.817268	0.836699	0.768781	0.924397	0.367822	0.409649	0.559683	0.637892	0.762453	0.419766	0.711341	0.678283	0.810059	0.784665	0.730613	0.849737	0.810892	0.837495	0.752521	0.919838	0.0599763
243	0.371671	0.41532	0.459979	0.458231	0.541806	0.440366	0.598079	0.519856	0.578833	0.638411	0.734913	0.816329	0.814379	0.817264	0.764497	0.914273	0.37276	0.415188	0.53094	0.521477	0.614958	0.45586	0.640307	0.542685	0.649744	0.695933	0.744207	0.836519	0.816896	0.836373	0.76845	0.924174	0.367614	0.409346	0.559479	0.637687	0.762299	0.419325	0.710857	0.678008	0.80982	0.784231	0.730108	0.8495	0.810434	0.837214	0.752067	0.91956	0.059658
244	0.371329	0.414982	0.459667	0.458041	0.541547	0.440023	0.597693	0.519541	0.578459	0.638119	0.734503	0.816072	0.813922	0.816994	0.764106	0.914059	0.3725	0.41481	0.530699	0.521254	0.614693	0.45545	0.640055	0.542383	0.649472	0.695562	0.743917	0.836192	0.816607	0.836024	0.768053	0.923993	0.367279	0.408987	0.559252	0.63744	0.762123	0.418956	0.710569	0.677747	0.809634	0.7838	0.729664	0.849255	0.810143	0.836893	0.751642	0.919263	0.0592744
245	0.37104	0.414675	0.459457	0.457783	0.541295	0.439786	0.597354	0.519286	0.578125	0.637831	0.734081	0.81592	0.813668	0.816634	0.763758	0.913855	0.372278	0.414516	0.530498	0.521008	0.614441	0.455061	0.639581	0.542136	0.649206	0.695256	0.743601	0.835942	0.816206	0.835625	0.767714	0.923833	0.367004	0.408721	0.558999	0.637103	0.761959	0.418593	0.710197	0.677408	0.809428	0.783358	0.729076	0.849041	0.809735	0.836558	0.751155	0.919069	0.0589407
246	0.370742	0.414375	0.459234	0.457473	0.541017	0.439539	0.596954	0.518977	0.577756	0.637569	0.733727	0.815587	0.813217	0.816301	0.763459	0.913662	0.372049	0.414233	0.530206	0.520772	0.614167	0.454783	0.639329	0.541774	0.648939	0.694944	0.743251	0.83567	0.815959	0.835374	0.767407	0.923694	0.36681	0.408441	0.558785	0.636852	0.761793	0.41815	0.709876	0.677123	0.80923	0.783009	0.728679	0.848768	0.809281	0.836081	0.750822	0.918795	0.0585836
247	0.370486	0.414122	0.458957	0.457178	0.540702	0.439237	0.596618	0.518582	0.577504	0.637232	0.733406	0.815351	0.812841	0.815945	0.763095	0.913481	0.371811	0.413929	0.529979	0.520495	0.613931	0.454352	0.638905	0.541386	0.648584	0.694662	0.743008	0.835419	0.815691	0.835008	0.76693	0.92355	0.366617	0.408079	0.558512	0.636624	0.761603	0.417671	0.709493	0.676754	0.80901	0.782616	0.728233	0.848501	0.808913	0.835667	0.75035	0.918541	0.0582918
248	0.370154	0.413782	0.45871	0.456956	0.540478	0.438919	0.596195	0.518211	0.577103	0.636896	0.732929	0.815058	0.812386	0.815643	0.762791	0.913319	0.371526	0.413594	0.529705	0.520246	0.613628	0.454039	0.638461	0.541064	0.648271	0.694417	0.7426	0.835129	0.815399	0.834658	0.766555	0.923393	0.366337	0.407748	0.558303	0.636354	0.76145	0.417305	0.709157	0.676499	0.808789	0.782128	0.72794	0.848274	0.808564	0.835296	0.749992	0.918327	0.0578703
249	0.369891	0.413482	0.458501	0.456676	0.540241	0.438593	0.595839	0.517868	0.576909	0.636545	0.732553	0.814828	0.811992	0.815295	0.762425	0.913116	0.371244	0.413279	0.529466	0.520002	0.613357	0.453687	0.638009	0.540633	0.648036	0.69413	0.742249	0.834862	0.814975	0.834448	0.766184	0.923178	0.36605	0.407468	0.5581	0.636112	0.761319	0.416945	0.708886	0.676245	0.808588	0.78164	0.727568	0.848063	0.808148	0.834841	0.749637	0.918068	0.0575099
250	0.369677	0.413275	0.458227	0.456496	0.539989	0.438232	0.595509	0.5175	0.576602	0.636206	0.732131	0.8145	0.811514	0.814933	0.76204	0.912905	0.371042	0.413056	0.529185	0.51973	0.61312	0.453228	0.637492	0.540293	0.647735	0.693796	0.741881	0.834589	0.814441	0.834197	0.765831	0.922966	0.365747	0.407167	0.557889	0.635865	0.761134	0.416489	0.708443	0.675964	0.80839	0.781311	0.727281	0.847833	0.807791	0.834541	0.74907	0.917873	0.0572146
251	0.3694	0.413001	0.457994	0.456214	0.539653	0.437963	0.595207	0.51713	0.576371	0.635884	0.731814	0.814238	0.811262	0.814597	0.761544	0.912718	0.370804	0.41281	0.528926	0.519398	0.612952	0.452829	0.637122	0.539904	0.647448	0.693451	0.741511	0.834365	0.814058	0.833866	0.765493	0.922777	0.36554	0.406942	0.55768	0.63557	0.760938	0.416118	0.708104	0.675649	0.808232	0.780984	0.726828	0.847537	0.807256	0.834228	0.748652	0.917604	0.056841
252	0.369178	0.412722	0.457761	0.455908	0.53944	0.437608	0.594766	0.516765	0.575926	0.635508	0.731565	0.813967	0.810689	0.814338	0.761146	0.912509	0.370516	0.412524	0.528718	0.519229	0.612734	0.452467	0.636623	0.539492	0.647195	0.693074	0.741112	0.834143	0.813732	0.833637	0.765186	0.922572	0.365343	0.406626	0.557401	0.635357	0.760811	0.415689	0.707813	0.675461	0.807978	0.780547	0.726487	0.847243	0.806785	0.833933	0.748106	0.917389	0.0564906
253	0.368952	0.412382	0.457437	0.45563	0.539159	0.437279	0.594326	0.516434	0.575603	0.63529	0.73124	0.813748	0.81032	0.813905	0.760831	0.912246	0.370309	0.41217	0.52847	0.519057	0.612417	0.452146	0.636217	0.539162	0.646834	0.692755	0.740794	0.833762	0.81338	0.833335	0.764881	0.922422	0.365041	0.406368	0.557144	0.63506	0.760658	0.415335	0.707311	0.675168	0.807786	0.780195	0.726191	0.84696	0.806366	0.833556	0.747639	0.917184	0.0561363
254	0.368578	0.412087	0.457176	0.455355	0.538848	0.436918	0.593834	0.516048	0.575334	0.634952	0.73075	0.813492	0.809931	0.813665	0.760369	0.912038	0.370096	0.411903	0.528236	0.51889	0.612184	0.451865	0.635689	0.538875	0.646476	0.692464	0.740433	0.833455	0.813032	0.833103	0.764563	0.922228	0.364732	0.406029	0.556882	0.634855	0.760468	0.414893	0.706928	0.674948	0.807602	0.779714	0.725787	0.846681	0.805945	0.833287	0.747257	0.916936	0.0557737
255	0.368361	0.411776	0.456977	0.455127	0.538624	0.436673	0.593487	0.515719	0.574975	0.634638	0.730476	0.813244	0.809635	0.813397	0.759924	0.911848	0.369824	0.41163	0.528019	0.518644	0.611954	0.45144	0.635201	0.538609	0.646157	0.692083	0.740141	0.833176	0.812647	0.832821	0.764238	0.922029	0.364432	0.405756	0.55669	0.63463	0.760318	0.4145	0.706563	0.674674	0.807335	0.779266	0.725402	0.846426	0.805537	0.83295	0.74688	0.91668	0.0554407
256	0.368141	0.411576	0.456689	0.454895	0.538314	0.43637	0.592965	0.515375	0.574618	0.63434	0.730219	0.813004	0.809228	0.813081	0.759558	0.91165	0.369626	0.411421	0.527775	0.518452	0.611741	0.451103	0.634752	0.538239	0.645808	0.691857	0.73983	0.832908	0.81225	0.832435	0.763904	0.921826	0.364141	0.40548	0.556358	0.634369	0.760185	0.414106	0.706093	0.674366	0.807142	0.778879	0.725018	0.846137	0.8052	0.832626	0.74644	0.916466	0.0551468
257	0.367849	0.411279	0.456486	0.454701	0.538035	0.4361	0.592557	0.514849	0.574289	0.633956	0.729911	0.812767	0.808709	0.8128	0.759291	0.91145	0.369382	0.411088	0.527538	0.518151	0.611461	0.450817	0.634316	0.537876	0.645526	0.691616	0.739529	0.832671	0.811969	0.83214	0.763548	0.921664	0.363911	0.40511	0.556032	0.634145	0.760013	0.413791	0.705781	0.674115	0.806926	0.778555	0.724753	0.845859	0.804754	0.832329	0.746056	0.916225	0.0547958
258	0.367584	0.410993	0.456245	0.454439	0.537793	0.435752	0.592222	0.514531	0.574028	0.633513	0.729556	0.812526	0.808447	0.812508	0.759003	0.911222	0.369146	0.410814	0.527293	0.517858	0.611142	0.450486	0.633925	0.537532	0.645247	0.691221	0.739161	0.832437	0.811618	0.831774	0.763237	0.921493	0.36359	0.404876	0.555827	0.633899	0.759845	0.413244	0.70536	0.673798	0.806716	0.778164	0.724367	0.845671	0.804396	0.831992	0.745638	0.915978	0.0544539
259	0.367307	0.410799	0.456027	0.454171	0.537576	0.435494	0.591914	0.514292	0.573695	0.633187	0.729134	0.812319	0.808158	0.812237	0.758613	0.911037	0.368923	0.410529	0.527072	0.517573	0.610858	0.45018	0.633536	0.537032	0.645023	0.690904	0.738754	0.832261	0.811284	0.831448	0.762941	0.921265	0.363395	0.404573	0.5556	0.633629	0.759693	0.412872	0.704945	0.673539	0.806518	0.777786	0.723927	0.845373	0.804091	0.831647	0.745256	0.915704	0.0542028
260	0.367102	0.41042	0.455806	0.453916	0.537376	0.435201	0.591472	0.513932	0.573312	0.6328	0.728782	0.812137	0.807789	0.811976	0.758262	0.910847	0.368697	0.410248	0.526773	0.517262	0.610695	0.449823	0.6331	0.53669	0.644697	0.690584	0.738473	0.831939	0.810992	0.831198	0.762516	0.921081	0.363151	0.404274	0.555357	0.633368	0.759524	0.412446	0.704547	0.673315	0.806292	0.777408	0.723506	0.845123	0.803747	0.8313	0.744757	0.915428	0.053799
261	0.366833	0.410128	0.455573	0.453701	0.537178	0.434926	0.591059	0.51363	0.572952	0.63245	0.728538	0.81188	0.807444	0.811591	0.757922	0.910637	0.36853	0.409956	0.526564	0.516985	0.610457	0.449406	0.632729	0.536351	0.644393	0.690304	0.738188	0.831713	0.810631	0.830907	0.762111	0.920893	0.362958	0.403937	0.555126	0.633091	0.75934	0.412106	0.704193	0.673081	0.806072	0.776958	0.723131	0.84485	0.803408	0.831004	0.744348	0.915173	0.0534905
262	0.366679	0.409889	0.455383	0.453364	0.536915	0.434635	0.590407	0.513228	0.572635	0.632099	0.728161	0.81163	0.807177	0.811242	0.757659	0.910457	0.368328	0.409666	0.526328	0.516673	0.610296	0.449035	0.632357	0.536007	0.644105	0.690011	0.737885	0.831438	0.810197	0.830515	0.761846	0.920646	0.36273	0.403688	0.554854	0.632885	0.759174	0.411772	0.703869	0.672824	0.805894	0.776623	0.722688	0.844599	0.803045	0.830681	0.743782	0.914932	0.0531754
263	0.366321	0.409618	0.455114	0.453132	0.536663	0.434315	0.59	0.512822	0.572359	0.631824	0.72783	0.811372	0.806842	0.810922	0.757257	0.910253	0.368115	0.409444	0.526106	0.516378	0.610038	0.448695	0.631971	0.535644	0.643749	0.689742	0.737599	0.831216	0.809914	0.83019	0.761394	0.920453	0.362471	0.403461	0.554569	0.632627	0.759001	0.411323	0.703504	0.67257	0.80572	0.77624	0.722248	0.844332	0.802601	0.830359	0.743453	0.914735	0.0528544
264	0.36607	0.409329	0.454858	0.452874	0.536414	0.433906	0.589559	0.51246	0.572029	0.631566	0.727522	0.811129	0.806544	0.810581	0.75696	0.910103	0.367893	0.409211	0.525851	0.516087	0.609834	0.448392	0.63153	0.535334	0.64346	0.689455	0.737181	0.830966	0.809633	0.829848	0.761115	0.920307	0.362212	0.403181	0.554422	0.632297	0.75888	0.411033	0.703045	0.672354	0.805541	0.775803	0.721708	0.844014	0.80215	0.830024	0.743012	0.914494	0.0525028
265	0.365791	0.409159	0.4546	0.45264	0.536195	0.4336	0.58928	0.512125	0.571785	0.631231	0.727228	0.810888	0.806236	0.810269	0.756669	0.909938	0.367663	0.408999	0.525572	0.515915	0.609606	0.448049	0.631159	0.535011	0.643096	0.689161	0.736743	0.830707	0.809324	0.829543	0.760748	0.920153	0.361968	0.402883	0.554169	0.632034	0.758724	0.410722	0.70263	0.672128	0.805361	0.775285	0.721332	0.843737	0.801813	0.82961	0.742594	0.914267	0.0522091
266	0.365576	0.408913	0.454341	0.452434	0.535878	0.433287	0.589007	0.511735	0.571421	0.630919	0.7269	0.81061	0.805852	0.810004	0.756265	0.909758	0.367394	0.408722	0.52536	0.515694	0.609399	0.447661	0.630749	0.534544	0.642809	0.688893	0.736411	0.830494	0.808996	0.829266	0.760315	0.919975	0.36169	0.402589	0.553884	0.631784	0.758561	0.410334	0.702115	0.671898	0.805164	0.774907	0.720963	0.843479	0.801361	0.829286	0.742183	0.913988	0.0518389
267	0.36534	0.408723	0.454027	0.452175	0.535639	0.432981	0.588589	0.511323	0.571223	0.630577	0.726481	0.810297	0.805495	0.809655	0.756032	0.909564	0.367186	0.408523	0.525124	0.51539	0.609168	0.447371	0.63043	0.534186	0.642555	0.688561	0.735989	0.830211	0.808682	0.829012	0.760076	0.919759	0.361431	0.40234	0.55368	0.631618	0.758384	0.409947	0.701785	0.671649	0.804942	0.77465	0.720567	0.843256	0.800838	0.82896	0.741759	0.913729	0.0515273
268	0.365111	0.408429	0.453755	0.451913	0.535361	0.432648	0.588334	0.510809	0.570935	0.630244	0.726069	0.810094	0.805126	0.809406	0.755688	0.909398	0.366928	0.408238	0.524817	0.515182	0.608969	0.44704	0.630078	0.533833	0.642279	0.688277	0.735619	0.829904	0.808317	0.828819	0.759727	0.919574	0.361166	0.402058	0.553412	0.631324	0.758183	0.409578	0.701428	0.671444	0.804721	0.774301	0.720065	0.842928	0.800443	0.828571	0.74132	0.913487	0.0511803
269	0.364797	0.408181	0.453467	0.451722	0.535091	0.432383	0.588042	0.510514	0.570661	0.629808	0.7258	0.809818	0.804766	0.809137	0.755414	0.909167	0.366694	0.407969	0.524612	0.514941	0.608782	0.44675	0.62969	0.533413	0.642003	0.688053	0.735223	0.829674	0.807972	0.828548	0.759321	0.919357	0.360927	0.401759	0.55318	0.631103	0.758025	0.409286	0.701105	0.671202	0.804512	0.773808	0.719606	0.842673	0.800135	0.828267	0.740869	0.913259	0.0508657
270	0.364562	0.407937	0.453225	0.451484	0.534888	0.432095	0.587614	0.510167	0.570386	0.629584	0.725463	0.809502	0.804347	0.808788	0.755117	0.908998	0.366483	0.407742	0.524392	0.514711	0.60852	0.446427	0.629316	0.532942	0.641746	0.687842	0.734945	0.829327	0.807547	0.828193	0.758927	0.919174	0.360698	0.401483	0.552969	0.630905	0.757854	0.40891	0.700805	0.670862	0.804213	0.773521	0.719093	0.842438	0.799697	0.828011	0.740447	0.913057	0.0505378
271	0.364365	0.407716	0.45297	0.45116	0.534622	0.431824	0.587319	0.509793	0.570157	0.629252	0.724964	0.809216	0.804053	0.80852	0.754827	0.908755	0.36618	0.407525	0.52419	0.514404	0.608295	0.446055	0.629012	0.532584	0.641502	0.687498	0.734513	0.829087	0.807208	0.827986	0.758603	0.918986	0.360494	0.401157	0.552692	0.630673	0.757649	0.408625	0.700483	0.670598	0.80404	0.773074	0.718654	0.842177	0.799272	0.827608	0.740048	0.912754	0.0501671
272	0.36412	0.407393	0.45271	0.450842	0.534399	0.431538	0.586896	0.509486	0.569869	0.628922	0.724664	0.808932	0.803727	0.808196	0.754482	0.908583	0.365908	0.407195	0.523968	0.514147	0.60805	0.445695	0.628693	0.532269	0.641227	0.687229	0.734239	0.828782	0.806773	0.827776	0.758298	0.918801	0.360196	0.400872	0.552434	0.630416	0.757496	0.408178	0.700135	0.670358	0.803829	0.772699	0.718357	0.841907	0.798869	0.827307	0.739633	0.912479	0.049831
273	0.3639	0.407143	0.452516	0.450594	0.534143	0.431203	0.58647	0.509138	0.569507	0.628611	0.724282	0.808674	0.803511	0.807917	0.754171	0.908447	0.365655	0.406896	0.52379	0.51388	0.607878	0.445447	0.628258	0.53188	0.640946	0.686882	0.733871	0.82857	0.806397	0.827517	0.75802	0.918608	0.35992	0.400538	0.552248	0.630181	0.757353	0.407795	0.699765	0.670025	0.803634	0.772358	0.71788	0.841592	0.798558	0.82702	0.73903	0.912298	0.0494416
274	0.363692	0.406903	0.45229	0.450343	0.533924	0.430876	0.586103	0.508848	0.569229	0.628356	0.723853	0.80847	0.803223	0.807684	0.753832	0.90825	0.365439	0.406641	0.523589	0.51367	0.607673	0.445194	0.627795	0.531453	0.64068	0.686607	0.733489	0.828261	0.805994	0.827244	0.757612	0.918409	0.359704	0.400262	0.551995	0.629924	0.75719	0.407484	0.699382	0.66981	0.803448	0.772006	0.717499	0.841364	0.798221	0.826658	0.738688	0.91203	0.0491199
275	0.363422	0.406632	0.452108	0.450144	0.533713	0.430592	0.585811	0.508524	0.568928	0.627967	0.723518	0.808213	0.802844	0.807428	0.753516	0.908049	0.365225	0.406333	0.523389	0.513437	0.607487	0.444802	0.627478	0.531138	0.64043	0.686277	0.733114	0.828091	0.805689	0.826968	0.757287	0.918215	0.359428	0.399996	0.55181	0.629658	0.757002	0.407066	0.699004	0.669538	0.803249	0.771626	0.717043	0.841136	0.7979	0.826267	0.73831	0.911846	0.048745
276	0.363185	0.406454	0.451834	0.449946	0.533534	0.430331	0.585415	0.508169	0.568601	0.627694	0.72313	0.807952	0.802536	0.807142	0.753171	0.907818	0.365042	0.406128	0.52312	0.513266	0.607217	0.444566	0.627067	0.530775	0.640116	0.685954	0.732815	0.827847	0.805326	0.826683	0.757022	0.917984	0.359181	0.399767	0.551578	0.629404	0.756861	0.406712	0.698698	0.669318	0.803079	0.771311	0.716526	0.84089	0.797574	0.826007	0.737952	0.911588	0.0484351
277	0.362959	0.40619	0.45157	0.449738	0.533292	0.429981	0.584948	0.507814	0.568217	0.627362	0.722796	0.807712	0.802159	0.806754	0.752859	0.907632	0.364765	0.405804	0.522904	0.513046	0.606998	0.444256	0.626643	0.530349	0.639875	0.68566	0.732504	0.827579	0.805004	0.826369	0.756633	0.917838	0.358908	0.399499	0.551351	0.629083	0.756723	0.406423	0.698311	0.669067	0.802933	0.770965	0.716216	0.840639	0.797194	0.825703	0.737674	0.911334	0.048045
278	0.362747	0.405832	0.451394	0.449501	0.533082	0.429709	0.58448	0.507442	0.567912	0.627046	0.722522	0.807443	0.801813	0.806551	0.752505	0.90744	0.364503	0.405515	0.522704	0.512875	0.606823	0.443977	0.626234	0.530083	0.639665	0.685347	0.73217	0.8274	0.804671	0.826054	0.756319	0.917691	0.358701	0.39915	0.551174	0.628881	0.756579	0.406092	0.698048	0.668839	0.802752	0.770515	0.715825	0.840376	0.796809	0.825361	0.737191	0.911105	0.0476932
279	0.362516	0.40549	0.451216	0.449213	0.532803	0.429488	0.584192	0.507101	0.567607	0.626847	0.722289	0.807161	0.801428	0.806231	0.752142	0.907248	0.364323	0.40522	0.522509	0.512649	0.606602	0.443656	0.625786	0.52975	0.639323	0.685083	0.731783	0.827161	0.804293	0.825752	0.755874	0.917539	0.358478	0.398823	0.550949	0.628644	0.756433	0.40573	0.697787	0.66857	0.80252	0.770138	0.715339	0.840111	0.796532	0.825021	0.736822	0.910854	0.0474971
280	0.362261	0.405207	0.450982	0.44894	0.532512	0.429204	0.583848	0.506654	0.567209	0.626535	0.721935	0.806907	0.801142	0.805906	0.751787	0.907075	0.364076	0.404931	0.522337	0.512396	0.606322	0.443353	0.625239	0.529467	0.639014	0.684869	0.731469	0.826932	0.803949	0.825442	0.7556	0.917377	0.358298	0.398585	0.550742	0.628408	0.75632	0.405456	0.697556	0.668334	0.802314	0.769753	0.715034	0.839834	0.796146	0.824587	0.736505	0.910696	0.0471344
281	0.361993	0.404998	0.450743	0.448674	0.532295	0.428883	0.583375	0.50628	0.566903	0.626237	0.721654	0.806682	0.800835	0.805668	0.751466	0.906881	0.363875	0.404688	0.522137	0.512085	0.60614	0.443057	0.624946	0.529086	0.638703	0.684551	0.731157	0.826729	0.803572	0.825193	0.755208	0.917168	0.358016	0.398296	0.55051	0.628217	0.756153	0.405147	0.697269	0.66805	0.802113	0.769284	0.714531	0.839511	0.795777	0.824163	0.736052	0.910463	0.0468613
282	0.361691	0.404757	0.450595	0.448346	0.532028	0.428595	0.583031	0.506039	0.566684	0.625949	0.721299	0.806489	0.800571	0.805268	0.751163	0.90671	0.363663	0.404483	0.521935	0.511797	0.60597	0.442633	0.624439	0.528778	0.638403	0.684321	0.730842	0.826507	0.80313	0.824951	0.754876	0.916987	0.357832	0.397973	0.550259	0.627989	0.755996	0.404792	0.696877	0.667775	0.801914	0.768957	0.714167	0.839221	0.795364	0.823776	0.735625	0.91027	0.0465257
283	0.361472	0.404419	0.450367	0.448076	0.531815	0.428326	0.582635	0.505679	0.566394	0.625561	0.720971	0.806235	0.800204	0.804972	0.750882	0.906473	0.363405	0.404125	0.521671	0.511488	0.605775	0.442362	0.62399	0.52848	0.638062	0.684008	0.730592	0.826305	0.802875	0.824708	0.754549	0.916804	0.357536	0.397681	0.550068	0.627767	0.755847	0.404474	0.696568	0.667546	0.801726	0.768512	0.713829	0.838948	0.794916	0.823472	0.735335	0.910079	0.0461234
284	0.361281	0.404176	0.450143	0.447898	0.531618	0.428105	0.582305	0.505363	0.566137	0.625242	0.720613	0.805993	0.799827	0.804718	0.750592	0.906265	0.363167	0.40386	0.521453	0.51122	0.605452	0.442099	0.623641	0.528122	0.637771	0.683722	0.730206	0.826037	0.802541	0.824494	0.754219	0.916594	0.357294	0.397497	0.54977	0.627563	0.755662	0.404146	0.696268	0.667309	0.801539	0.768077	0.713306	0.83871	0.794578	0.823142	0.734991	0.909857	0.0456932
285	0.36096	0.403891	0.449907	0.447686	0.531408	0.427801	0.581911	0.504915	0.565885	0.624937	0.720327	0.805742	0.799541	0.804443	0.750211	0.905973	0.362951	0.403616	0.521223	0.51099	0.605219	0.44176	0.623183	0.527763	0.637491	0.683402	0.729873	0.825764	0.802173	0.824213	0.753874	0.916371	0.357053	0.397264	0.54949	0.627301	0.755531	0.403763	0.695923	0.667039	0.801308	0.767678	0.712845	0.838443	0.794283	0.822794	0.734597	0.909626	0.0454133
286	0.360739	0.403637	0.449623	0.447445	0.531257	0.427528	0.581582	0.504608	0.565503	0.624641	0.720046	0.805524	0.799161	0.804123	0.749801	0.905817	0.362769	0.403357	0.520967	0.510722	0.605035	0.441404	0.622826	0.527435	0.63724	0.683084	0.729523	0.82546	0.801806	0.824031	0.753655	0.916181	0.3568	0.396959	0.549243	0.627065	0.755383	0.403363	0.695609	0.666851	0.80111	0.767216	0.712359	0.838176	0.793911	0.822518	0.734132	0.909373	0.0450595
287	0.360494	0.403398	0.449405	0.447052	0.531106	0.427192	0.581218	0.504261	0.565216	0.624311	0.719656	0.80523	0.79884	0.803821	0.749466	0.905673	0.362574	0.403141	0.520685	0.510513	0.60482	0.441043	0.622423	0.527152	0.63693	0.682755	0.729155	0.825186	0.801492	0.823764	0.753356	0.915987	0.356532	0.396639	0.549032	0.626822	0.755225	0.402951	0.695251	0.666641	0.800928	0.766865	0.711994	0.837939	0.793539	0.822268	0.733614	0.909152	0.0447665
288	0.360264	0.403174	0.449159	0.446824	0.530865	0.426871	0.580898	0.503876	0.564893	0.623907	0.71941	0.804897	0.79837	0.803557	0.749037	0.905425	0.362371	0.402765	0.520462	0.510322	0.604601	0.440754	0.622024	0.526829	0.636693	0.682525	0.728744	0.824967	0.801133	0.823465	0.752963	0.915793	0.356258	0.396225	0.548795	0.626559	0.755068	0.402629	0.694953	0.666279	0.800709	0.766401	0.711728	0.837666	0.793156	0.821935	0.733185	0.908804	0.044512
289	0.360054	0.402877	0.448916	0.446634	0.530581	0.426596	0.580465	0.503563	0.564589	0.623643	0.719137	0.804707	0.797969	0.803273	0.748719	0.905225	0.362182	0.402528	0.520237	0.510118	0.604404	0.440288	0.621706	0.526563	0.636423	0.682256	0.728384	0.824789	0.800716	0.823139	0.752685	0.915609	0.355988	0.395944	0.548607	0.626336	0.754929	0.40238	0.694594	0.666049	0.800511	0.766015	0.711339	0.837294	0.792657	0.821598	0.732738	0.90855	0.0442107
290	0.3598	0.402619	0.448669	0.446363	0.530412	0.426253	0.580075	0.503224	0.564193	0.62342	0.718741	0.80451	0.797553	0.80296	0.748381	0.905049	0.361969	0.402311	0.519964	0.509874	0.604202	0.439914	0.621308	0.526227	0.636108	0.681987	0.728068	0.824565	0.800445	0.822868	0.75233	0.915393	0.355779	0.395716	0.548323	0.626068	0.754733	0.402003	0.694096	0.66585	0.800287	0.765626	0.710901	0.836986	0.792264	0.821226	0.732291	0.908344	0.0438652
291	0.359514	0.402341	0.448408	0.446176	0.530196	0.426019	0.579688	0.502927	0.563868	0.623129	0.718434	0.804267	0.797313	0.80258	0.748084	0.904838	0.361751	0.402047	0.519751	0.509717	0.603985	0.439566	0.621027	0.525988	0.635824	0.681767	0.72779	0.824366	0.800211	0.82259	0.752034	0.915188	0.355512	0.395403	0.548102	0.625796	0.754562	0.401615	0.693838	0.665538	0.800092	0.765259	0.71047	0.836718	0.791884	0.820875	0.731766	0.908133	0.0435635
292	0.359192	0.402038	0.448216	0.445964	0.530009	0.42571	0.579298	0.502577	0.563601	0.62282	0.7182	0.804039	0.797007	0.802239	0.747736	0.904647	0.361546	0.401754	0.519513	0.509499	0.603751	0.439264	0.620563	0.525593	0.635601	0.68145	0.727368	0.824142	0.799912	0.822307	0.751751	0.914957	0.355254	0.395031	0.547876	0.625604	0.754392	0.401329	0.693508	0.66531	0.799859	0.764862	0.710192	0.836474	0.791475	0.820544	0.73137	0.907892	0.0432585
293	0.358938	0.401823	0.448037	0.445632	0.529762	0.425422	0.578951	0.502321	0.563268	0.622569	0.717936	0.803703	0.796693	0.801983	0.74739	0.904452	0.361314	0.401532	0.519298	0.509273	0.603578	0.438916	0.620057	0.525242	0.635303	0.681149	0.727019	0.823816	0.799497	0.822122	0.751423	0.914772	0.35495	0.394801	0.547613	0.625351	0.754254	0.400972	0.693069	0.665115	0.79966	0.764567	0.709739	0.836151	0.791147	0.820243	0.730954	0.907654	0.043029
294	0.358661	0.401546	0.447823	0.445404	0.529556	0.425124	0.578614	0.501965	0.562964	0.62232	0.717552	0.803504	0.796356	0.801708	0.747074	0.904271	0.361044	0.401254	0.519082	0.509071	0.60337	0.438604	0.619695	0.524881	0.635008	0.68093	0.726649	0.823572	0.799224	0.82184	0.751121	0.914542	0.354775	0.394531	0.547444	0.625155	0.754069	0.400671	0.692712	0.664857	0.799443	0.764196	0.709332	0.835902	0.790799	0.819898	0.730634	0.907424	0.0426586
295	0.358462	0.401327	0.447589	0.445117	0.529334	0.424829	0.578161	0.501476	0.562693	0.62203	0.717284	0.803225	0.795934	0.801428	0.746697	0.904028	0.360853	0.400996	0.518879	0.508843	0.60313	0.438352	0.619301	0.524406	0.634713	0.680679	0.72626	0.823301	0.798967	0.821576	0.750799	0.914332	0.354536	0.394287	0.547241	0.624936	0.753925	0.400265	0.692366	0.664661	0.799238	0.763789	0.708882	0.835561	0.790393	0.819568	0.730225	0.907183	0.0423853
296	0.358233	0.401055	0.447367	0.444905	0.529047	0.424489	0.577824	0.501205	0.562431	0.621731	0.716999	0.802965	0.795564	0.801148	0.746418	0.903838	0.360645	0.400739	0.51873	0.508672	0.602892	0.438122	0.618951	0.524093	0.634422	0.680411	0.725998	0.823067	0.798659	0.821374	0.750417	0.914185	0.354311	0.393985	0.54699	0.624685	0.753768	0.39998	0.692058	0.664337	0.799007	0.763389	0.708503	0.835307	0.789929	0.819162	0.72989	0.906928	0.0419955
297	0.357949	0.400776	0.447166	0.444692	0.528795	0.424182	0.577497	0.500839	0.562227	0.621408	0.716689	0.802744	0.795203	0.80091	0.746132	0.903616	0.360481	0.400485	0.518459	0.508476	0.602662	0.43779	0.618582	0.523757	0.634141	0.680142	0.725623	0.822744	0.79834	0.821139	0.750041	0.914022	0.354047	0.393725	0.546718	0.624416	0.75361	0.399564	0.691698	0.664113	0.798789	0.762931	0.708083	0.834989	0.78958	0.818927	0.729448	0.90671	0.0417466
298	0.357759	0.400477	0.446912	0.444405	0.528586	0.423982	0.577197	0.500562	0.561903	0.621074	0.716442	0.802458	0.794869	0.800603	0.745862	0.903415	0.360288	0.400221	0.518269	0.508247	0.602402	0.437427	0.618152	0.523399	0.633862	0.679888	0.725279	0.822469	0.798052	0.820937	0.749736	0.913855	0.353841	0.393453	0.54647	0.624199	0.753477	0.399172	0.691357	0.663849	0.798592	0.762648	0.70776	0.834692	0.789168	0.8186	0.729033	0.906509	0.0414444
299	0.357461	0.400195	0.446663	0.444139	0.528307	0.423729	0.576725	0.500279	0.561673	0.620825	0.716165	0.802239	0.794506	0.800349	0.745572	0.903224	0.359918	0.399936	0.518037	0.508036	0.60224	0.437076	0.617893	0.523005	0.633603	0.679613	0.724983	0.82223	0.797718	0.820692	0.749436	0.91367	0.353653	0.393153	0.546247	0.623982	0.753324	0.398858	0.691093	0.663637	0.798392	0.762279	0.707382	0.83448	0.788865	0.818247	0.728599	0.906301	0.0410882
300	0.357274	0.399934	0.44641	0.443946	0.528074	0.423428	0.576408	0.499925	0.561289	0.620522	0.715843	0.801842	0.794271	0.799912	0.745277	0.903076	0.359729	0.399681	0.517824	0.507776	0.602034	0.436732	0.61741	0.522635	0.633298	0.679378	0.724692	0.822011	0.797341	0.820458	0.749127	0.913511	0.353461	0.392793	0.545994	0.62372	0.753196	0.398486	0.690793	0.663412	0.798189	0.76195	0.70707	0.834223	0.788621	0.8178	0.728192	0.906093	0.0406661
301	0.35704	0.399702	0.446208	0.443732	0.527847	0.423053	0.57601	0.499616	0.560934	0.62016	0.715536	0.801577	0.793999	0.799661	0.744978	0.902892	0.359559	0.399501	0.517567	0.507547	0.601815	0.436446	0.616972	0.522291	0.633032	0.67914	0.724348	0.821801	0.79703	0.820184	0.748838	0.913303	0.353125	0.392524	0.545772	0.62347	0.753049	0.398071	0.69052	0.663231	0.798018	0.761514	0.706695	0.833928	0.788268	0.817422	0.727739	0.905818	0.0403885
302	0.356851	0.399545	0.44601	0.44347	0.527626	0.422781	0.575658	0.499359	0.560616	0.619885	0.715122	0.801325	0.793732	0.799413	0.744708	0.902673	0.359369	0.399289	0.517298	0.507394	0.601665	0.436145	0.616617	0.521972	0.632745	0.678835	0.723985	0.821596	0.79666	0.819907	0.748543	0.91313	0.352932	0.392284	0.545567	0.623229	0.752954	0.397712	0.690068	0.66296	0.797839	0.7611	0.706196	0.833585	0.787897	0.817062	0.727232	0.905482	0.0400874
303	0.356619	0.399361	0.445819	0.443296	0.527412	0.42247	0.575381	0.49906	0.560373	0.61959	0.71477	0.801075	0.793399	0.799166	0.744366	0.902468	0.359186	0.399072	0.517112	0.50719	0.601499	0.435786	0.616214	0.521696	0.63252	0.678583	0.723626	0.821372	0.796425	0.819672	0.748171	0.912963	0.352737	0.391979	0.545368	0.623034	0.752816	0.397381	0.689773	0.66266	0.797586	0.760733	0.705777	0.833338	0.787439	0.81681	0.726851	0.905272	0.0398699
304	0.356419	0.399113	0.44561	0.443052	0.527151	0.422235	0.575062	0.498798	0.560063	0.619224	0.714386	0.800811	0.793127	0.798892	0.744086	0.902275	0.358964	0.398843	0.516888	0.506979	0.601281	0.43546	0.615819	0.521387	0.632275	0.678348	0.723339	0.821126	0.796109	0.819458	0.747884	0.912812	0.352528	0.391772	0.545149	0.622838	0.752696	0.397052	0.689446	0.662432	0.797411	0.760355	0.705373	0.833099	0.787118	0.816473	0.726563	0.905103	0.0395702
305	0.356192	0.398878	0.445358	0.442842	0.526964	0.421911	0.574711	0.49856	0.559784	0.618958	0.714041	0.800594	0.792804	0.79864	0.743858	0.902064	0.358793	0.398542	0.516665	0.506747	0.60104	0.435124	0.615431	0.521119	0.63207	0.678088	0.723064	0.820839	0.795815	0.819171	0.747613	0.912614	0.352319	0.391447	0.54497	0.622645	0.752571	0.396778	0.689177	0.662226	0.797188	0.75992	0.704847	0.832805	0.786772	0.816158	0.726113	0.904884	0.0392917
306	0.355977	0.398618	0.445137	0.442599	0.526745	0.421562	0.574259	0.49828	0.55953	0.618678	0.713809	0.800252	0.792498	0.798409	0.743514	0.901882	0.35855	0.398341	0.516468	0.506499	0.600836	0.434871	0.615089	0.520791	0.631766	0.677827	0.722788	0.820581	0.795511	0.818873	0.747259	0.912419	0.352041	0.391169	0.54466	0.622433	0.752381	0.396417	0.688926	0.661907	0.797013	0.759535	0.704525	0.832547	0.786432	0.815749	0.725648	0.904698	0.0389983
307	0.35572	0.398367	0.444929	0.442332	0.526475	0.421293	0.573891	0.497953	0.559268	0.618382	0.713526	0.799967	0.79213	0.798133	0.743147	0.901679	0.358361	0.398026	0.516221	0.506317	0.600621	0.434502	0.614807	0.520436	0.631484	0.677545	0.722512	0.820309	0.795177	0.818591	0.746895	0.912222	0.351789	0.390933	0.544421	0.622206	0.752225	0.396063	0.688581	0.661589	0.79686	0.759038	0.704159	0.832252	0.785909	0.815454	0.725258	0.904424	0.0386842
308	0.355416	0.39807	0.444746	0.442074	0.526291	0.42095	0.57362	0.49765	0.558969	0.618104	0.713219	0.799711	0.791848	0.797804	0.742885	0.901519	0.358103	0.397751	0.516056	0.506094	0.600397	0.434127	0.614412	0.520058	0.631262	0.677274	0.722169	0.820051	0.794882	0.818272	0.74658	0.912075	0.351544	0.390602	0.544234	0.621965	0.752089	0.39562	0.68828	0.661263	0.796617	0.758588	0.703752	0.831971	0.785608	0.815144	0.724964	0.904214	0.0384179
309	0.355192	0.397888	0.444526	0.441824	0.526038	0.420741	0.573243	0.497364	0.558695	0.617882	0.712914	0.799495	0.791536	0.797586	0.74258	0.901354	0.357896	0.397576	0.515846	0.505863	0.600205	0.433786	0.614081	0.519785	0.631116	0.676916	0.721855	0.819843	0.794527	0.818074	0.746114	0.911853	0.351372	0.390279	0.54394	0.621736	0.751922	0.395327	0.688072	0.661056	0.79643	0.758115	0.703417	0.831715	0.785292	0.814757	0.724622	0.904021	0.0381412
310	0.355027	0.397675	0.444292	0.441593	0.525871	0.420515	0.572866	0.497072	0.558481	0.617532	0.712553	0.799204	0.791226	0.797356	0.742283	0.901109	0.357721	0.397364	0.515638	0.50558	0.600016	0.43333	0.613675	0.519392	0.630896	0.676683	0.721553	0.819619	0.79416	0.817687	0.745752	0.911667	0.351111	0.390033	0.543787	0.621471	0.751781	0.394995	0.687723	0.66077	0.796243	0.757604	0.702933	0.831424	0.784794	0.814413	0.724314	0.903732	0.0377733
311	0.354816	0.397331	0.444031	0.44143	0.525696	0.42024	0.572484	0.496749	0.558154	0.617239	0.712248	0.798953	0.790971	0.797141	0.741856	0.900836	0.357495	0.397054	0.5154	0.505325	0.599853	0.433078	0.613298	0.519124	0.630659	0.676417	0.721198	0.819465	0.793779	0.817319	0.745466	0.911506	0.350809	0.389762	0.543539	0.621205	0.751651	0.394604	0.687359	0.660515	0.796055	0.757172	0.702621	0.831148	0.784463	0.814141	0.723935	0.903396	0.0375424
312	0.354566	0.397129	0.443797	0.441199	0.525438	0.419827	0.572189	0.496391	0.5579	0.616906	0.711919	0.798721	0.790611	0.796949	0.741557	0.900601	0.357245	0.396782	0.515227	0.505078	0.599671	0.432747	0.612918	0.518747	0.630388	0.676125	0.720855	0.819215	0.79342	0.817041	0.745098	0.91134	0.350512	0.389503	0.543356	0.620967	0.751471	0.394186	0.686996	0.660237	0.795843	0.756732	0.702299	0.830853	0.784144	0.813736	0.723564	0.90315	0.0371883
313	0.354317	0.396848	0.443558	0.44098	0.525212	0.419649	0.571873	0.49617	0.557577	0.616647	0.711642	0.798466	0.790285	0.796687	0.741318	0.900419	0.356979	0.396496	0.51503	0.504855	0.599479	0.432471	0.612478	0.518468	0.630116	0.6759	0.72057	0.819032	0.793172	0.816787	0.744781	0.911133	0.350286	0.389252	0.543196	0.620755	0.751331	0.393851	0.686619	0.659958	0.795695	0.756375	0.701935	0.830583	0.783846	0.813439	0.723267	0.90287	0.0368429
314	0.354127	0.396613	0.443365	0.440753	0.52501	0.419343	0.571332	0.495784	0.557302	0.616336	0.711221	0.798219	0.789912	0.7964	0.741041	0.900201	0.356751	0.39625	0.514737	0.504652	0.599241	0.43216	0.612048	0.518148	0.629808	0.675538	0.720291	0.818773	0.792892	0.81656	0.744499	0.910959	0.350073	0.388913	0.542947	0.620531	0.75118	0.393487	0.686236	0.659686	0.795509	0.755981	0.701553	0.830346	0.783437	0.813163	0.722942	0.902652	0.0365602
315	0.353913	0.396325	0.443218	0.440549	0.524737	0.419042	0.571004	0.495506	0.557058	0.616055	0.71092	0.797965	0.789651	0.796203	0.740751	0.899989	0.356561	0.396035	0.514519	0.504485	0.59905	0.431924	0.611608	0.517861	0.629519	0.67529	0.71989	0.818491	0.792672	0.816314	0.744197	0.910765	0.34977	0.388645	0.542744	0.620238	0.751042	0.393031	0.685949	0.659425	0.795347	0.755474	0.701164	0.830046	0.783112	0.812859	0.722418	0.90249	0.036254
316	0.353705	0.396056	0.443016	0.440328	0.524528	0.418832	0.570594	0.495175	0.556715	0.615721	0.710608	0.797761	0.789357	0.795939	0.740412	0.899778	0.356368	0.39579	0.51432	0.504321	0.598845	0.431507	0.611111	0.517451	0.629189	0.67502	0.719546	0.818212	0.792357	0.815953	0.74388	0.910585	0.349506	0.388407	0.542461	0.619931	0.750838	0.392711	0.685559	0.659218	0.795174	0.755031	0.700818	0.829811	0.782711	0.812592	0.722013	0.902241	0.0359578
317	0.3535	0.395791	0.442796	0.440057	0.524354	0.418491	0.570252	0.494928	0.556392	0.615418	0.710251	0.797512	0.789105	0.795657	0.740058	0.899619	0.356149	0.395557	0.51408	0.504138	0.598593	0.431173	0.610676	0.517121	0.628928	0.674709	0.719171	0.817938	0.792033	0.815657	0.743569	0.910436	0.349259	0.38819	0.542207	0.61965	0.750676	0.392324	0.685216	0.658999	0.794972	0.754611	0.700418	0.829476	0.78233	0.812259	0.721607	0.902002	0.0356259
318	0.353317	0.395605	0.442521	0.439815	0.524113	0.418188	0.569927	0.494581	0.556003	0.615145	0.709951	0.797205	0.788742	0.795433	0.73975	0.899423	0.355923	0.395315	0.513876	0.503943	0.598383	0.430883	0.610308	0.516837	0.628678	0.674297	0.718881	0.817712	0.791498	0.815461	0.743231	0.91024	0.349013	0.387955	0.542002	0.619405	0.750545	0.391976	0.684847	0.658813	0.794736	0.75422	0.700042	0.829216	0.781922	0.811992	0.721199	0.901745	0.0353101
319	0.353092	0.395364	0.442324	0.439581	0.523892	0.41787	0.56949	0.494229	0.555665	0.614781	0.709554	0.796996	0.788467	0.795206	0.739434	0.899192	0.355652	0.395052	0.513707	0.503781	0.598173	0.430638	0.609965	0.51651	0.628437	0.674002	0.718626	0.817479	0.791205	0.81525	0.742885	0.91007	0.348764	0.387662	0.541831	0.61911	0.75038	0.391715	0.684567	0.658632	0.794583	0.753785	0.699611	0.828965	0.781697	0.811645	0.72085	0.901548	0.0350084
320	0.352842	0.395091	0.442121	0.43932	0.523673	0.417479	0.56911	0.493914	0.555345	0.614546	0.709247	0.796752	0.788135	0.79498	0.739144	0.898976	0.355512	0.394774	0.513536	0.503536	0.597949	0.430316	0.609503	0.516219	0.628174	0.673737	0.718173	0.817261	0.790969	0.815006	0.742536	0.909904	0.348621	0.387389	0.541534	0.618893	0.750242	0.391335	0.684248	0.658355	0.794463	0.753373	0.699206	0.828709	0.78139	0.81139	0.720356	0.901306	0.0346295
321	0.352693	0.394852	0.441889	0.439067	0.523462	0.417055	0.568679	0.493618	0.555025	0.614293	0.708963	0.796532	0.787694	0.794704	0.738869	0.898809	0.355311	0.394522	0.513304	0.503337	0.597724	0.430031	0.609178	0.515885	0.627922	0.673511	0.717781	0.817099	0.79064	0.814727	0.742199	0.909733	0.348391	0.387076	0.541265	0.618687	0.750032	0.39099	0.68398	0.658156	0.794333	0.752962	0.698835	0.828483	0.780917	0.811068	0.719926	0.901051	0.0343854
322	0.352493	0.39464	0.441658	0.438802	0.523255	0.416792	0.568265	0.493324	0.554585	0.614024	0.708653	0.796287	0.7874	0.794437	0.738571	0.898601	0.355131	0.394293	0.513139	0.503133	0.597481	0.429672	0.608837	0.515513	0.627694	0.673205	0.717404	0.816819	0.790308	0.814455	0.741898	0.909555	0.348168	0.386735	0.541081	0.618446	0.749859	0.390648	0.683662	0.657888	0.794133	0.752437	0.698416	0.828143	0.780522	0.810808	0.719598	0.900858	0.0341515
323	0.35232	0.394383	0.441399	0.438571	0.522979	0.416581	0.56792	0.492911	0.55431	0.6137	0.708264	0.79598	0.787047	0.794195	0.73816	0.898426	0.354894	0.394073	0.512845	0.502914	0.597292	0.429352	0.608443	0.515202	0.627476	0.672916	0.71713	0.816605	0.790004	0.814093	0.741612	0.909392	0.34789	0.386496	0.540861	0.618163	0.749645	0.390344	0.683307	0.657714	0.793981	0.751906	0.698043	0.827847	0.780117	0.810442	0.719226	0.900653	0.0338955
324	0.352068	0.394159	0.441148	0.438315	0.52272	0.416317	0.567606	0.492566	0.553966	0.613425	0.707979	0.795728	0.786765	0.793882	0.737771	0.898267	0.354677	0.393782	0.512625	0.502654	0.597101	0.429085	0.608068	0.514739	0.627253	0.672669	0.716761	0.816415	0.789709	0.813759	0.741337	0.909231	0.347602	0.386151	0.540644	0.617962	0.749477	0.389989	0.683044	0.657469	0.793824	0.751283	0.697579	0.827565	0.779818	0.810077	0.718857	0.900469	0.0335702
325	0.351784	0.39398	0.440955	0.438107	0.522527	0.416039	0.567321	0.492231	0.553654	0.613121	0.707653	0.795494	0.786478	0.793681	0.737398	0.898042	0.354429	0.393536	0.51238	0.502445	0.596945	0.428764	0.607728	0.514397	0.627046	0.672444	0.716365	0.816221	0.789386	0.81351	0.741033	0.909079	0.347469	0.38586	0.540439	0.617775	0.749269	0.389728	0.682747	0.657271	0.793578	0.75085	0.697245	0.827316	0.779506	0.809732	0.718548	0.900209	0.0332883
326	0.351606	0.393747	0.440708	0.437837	0.522271	0.415821	0.567029	0.491953	0.553357	0.612855	0.707339	0.795227	0.786196	0.793361	0.73706	0.897845	0.35419	0.393328	0.512196	0.502232	0.596721	0.428516	0.607438	0.514121	0.626759	0.672153	0.716066	0.816012	0.789018	0.813203	0.740607	0.908916	0.3473	0.385561	0.540239	0.617537	0.749095	0.389345	0.682474	0.657024	0.793366	0.750395	0.696845	0.827017	0.779165	0.809288	0.718218	0.899973	0.0330177
327	0.351414	0.393521	0.440584	0.437586	0.522072	0.415579	0.56666	0.491669	0.553066	0.612582	0.707012	0.794952	0.785758	0.792952	0.73664	0.897666	0.353942	0.393052	0.511983	0.502031	0.59654	0.428163	0.607139	0.513774	0.626503	0.671874	0.715698	0.81575	0.788728	0.812977	0.740252	0.908763	0.347073	0.385331	0.540037	0.617297	0.748848	0.389049	0.682097	0.656839	0.79316	0.749992	0.696509	0.826773	0.778701	0.809017	0.717884	0.899697	0.0326012
328	0.351227	0.393252	0.440442	0.437334	0.521843	0.415343	0.56638	0.491369	0.5528	0.612263	0.706746	0.794787	0.78543	0.792772	0.736358	0.8975	0.353721	0.392824	0.5118	0.50181	0.596358	0.427849	0.606752	0.513521	0.626295	0.671557	0.715418	0.815552	0.788471	0.812767	0.74002	0.908553	0.346876	0.385029	0.539769	0.616997	0.748707	0.388677	0.681743	0.656617	0.793017	0.749555	0.696049	0.826434	0.778375	0.808741	0.717533	0.899429	0.0322927
329	0.35093	0.393	0.440201	0.437107	0.521607	0.41501	0.565999	0.491125	0.552481	0.611977	0.706446	0.794626	0.785136	0.792526	0.736079	0.897344	0.353523	0.392624	0.511619	0.501601	0.596183	0.427511	0.606336	0.513162	0.626012	0.671323	0.715011	0.815275	0.788143	0.812501	0.739748	0.90839	0.346712	0.384816	0.539536	0.616789	0.748566	0.388405	0.681392	0.656421	0.792808	0.749256	0.695727	0.826172	0.777941	0.808407	0.717134	0.899227	0.0319928
330	0.350767	0.392748	0.440012	0.436898	0.521423	0.414771	0.565725	0.490801	0.5522	0.611606	0.706107	0.794393	0.784871	0.792277	0.735757	0.897133	0.353318	0.392422	0.511459	0.501333	0.595925	0.427183	0.605993	0.512838	0.625762	0.671004	0.714694	0.815013	0.787867	0.812183	0.739437	0.908202	0.34647	0.384518	0.539334	0.616582	0.748367	0.388169	0.681014	0.656219	0.792684	0.748742	0.695401	0.82593	0.777561	0.808047	0.716741	0.898924	0.0316738
331	0.350606	0.392545	0.439805	0.436661	0.521205	0.414462	0.565419	0.490519	0.551887	0.611346	0.705842	0.79416	0.784614	0.792039	0.735514	0.896975	0.35307	0.392199	0.511227	0.501125	0.595708	0.426931	0.605645	0.51255	0.625465	0.670703	0.714372	0.814765	0.787425	0.811959	0.739146	0.908072	0.346248	0.384273	0.539093	0.616383	0.748191	0.387933	0.680679	0.655999	0.792472	0.74826	0.695097	0.825684	0.777211	0.807771	0.7164	0.898643	0.0313909
332	0.350337	0.39231	0.439598	0.436443	0.52095	0.414123	0.565023	0.490251	0.55167	0.611018	0.705493	0.793943	0.784205	0.791757	0.73522	0.896822	0.352831	0.391938	0.511021	0.500922	0.595579	0.42664	0.605272	0.512217	0.625202	0.670424	0.71401	0.814569	0.787031	0.811666	0.738856	0.907947	0.346068	0.38402	0.538798	0.616062	0.748013	0.387609	0.680446	0.655817	0.792245	0.747789	0.69482	0.825389	0.776793	0.807398	0.715948	0.89849	0.0311258
333	0.350151	0.392093	0.43939	0.436252	0.52075	0.413903	0.564762	0.489927	0.551368	0.610685	0.705166	0.793681	0.783916	0.791492	0.734965	0.896626	0.352586	0.391717	0.510787	0.50071	0.595428	0.426312	0.604919	0.511864	0.62499	0.670101	0.713604	0.814344	0.786763	0.811377	0.738563	0.90777	0.345878	0.383811	0.538644	0.615829	0.747896	0.387221	0.680183	0.655608	0.792071	0.747351	0.694573	0.825066	0.776489	0.807017	0.715607	0.898161	0.0307987
334	0.35	0.391863	0.439193	0.436049	0.520557	0.413648	0.564453	0.489574	0.551084	0.610345	0.704886	0.793427	0.783642	0.79113	0.734612	0.896439	0.352412	0.391512	0.510543	0.500558	0.595215	0.425907	0.604563	0.511563	0.624755	0.669854	0.713304	0.814082	0.786414	0.811124	0.738334	0.907625	0.345647	0.383509	0.538418	0.615614	0.747742	0.386925	0.679851	0.65535	0.791885	0.746908	0.694106	0.82478	0.776165	0.806711	0.715199	0.897974	0.0305171
335	0.34974	0.391569	0.438999	0.435792	0.520394	0.413424	0.564095	0.48929	0.550752	0.61002	0.704573	0.793216	0.78342	0.79084	0.734299	0.896233	0.35217	0.391296	0.510312	0.50032	0.595072	0.425589	0.604219	0.511251	0.624455	0.669551	0.713035	0.813859	0.786096	0.810829	0.738135	0.907485	0.345451	0.383232	0.538204	0.615406	0.747616	0.386548	0.679577	0.655113	0.791738	0.746368	0.693749	0.824548	0.775739	0.806416	0.714827	0.89777	0.0301984
336	0.349522	0.391341	0.438822	0.435534	0.520256	0.413146	0.563814	0.488938	0.550509	0.609711	0.704238	0.793019	0.783025	0.790459	0.733999	0.896018	0.351969	0.391006	0.510164	0.500122	0.594871	0.425205	0.603939	0.510905	0.624177	0.669284	0.712754	0.813687	0.785842	0.810557	0.737863	0.907342	0.345257	0.382902	0.538038	0.615225	0.747456	0.386123	0.679338	0.654901	0.791518	0.745946	0.693308	0.824374	0.775344	0.8061	0.714472	0.897566	0.0298847
337	0.349329	0.391075	0.438639	0.435308	0.519977	0.412957	0.563422	0.488698	0.550258	0.60938	0.703952	0.792773	0.782819	0.790126	0.733678	0.895849	0.351804	0.39074	0.509965	0.499927	0.594687	0.424981	0.603557	0.510552	0.623872	0.669061	0.712513	0.81349	0.785541	0.810305	0.737609	0.907165	0.344999	0.382713	0.537828	0.615005	0.747305	0.385891	0.67899	0.654725	0.791251	0.745564	0.693018	0.824167	0.774963	0.805745	0.714154	0.897284	0.0296491
338	0.349133	0.390853	0.438404	0.435048	0.519803	0.412677	0.563009	0.488332	0.549996	0.609072	0.703693	0.792466	0.782579	0.789823	0.733427	0.895662	0.351558	0.390465	0.509776	0.499707	0.59451	0.424746	0.603157	0.510186	0.623566	0.668782	0.71212	0.813249	0.785193	0.810006	0.73731	0.907013	0.344814	0.382457	0.537635	0.614773	0.747117	0.385568	0.678627	0.654465	0.791054	0.745159	0.692724	0.823931	0.774569	0.805473	0.713848	0.897017	0.0293757
339	0.348914	0.390564	0.438193	0.434871	0.519589	0.41243	0.562727	0.488045	0.549669	0.608705	0.703415	0.792267	0.782272	0.789588	0.733208	0.895535	0.351351	0.39018	0.509624	0.499488	0.594314	0.424482	0.602866	0.509883	0.623225	0.668516	0.711879	0.813061	0.784851	0.809766	0.737006	0.906806	0.344587	0.382226	0.537435	0.614547	0.746906	0.385251	0.678283	0.654236	0.790883	0.744533	0.692284	0.823626	0.774191	0.805267	0.713454	0.89681	0.0291277
340	0.348704	0.390321	0.437986	0.434627	0.519347	0.412097	0.562354	0.487826	0.549439	0.608415	0.703148	0.791978	0.781961	0.789411	0.732934	0.895272	0.35119	0.389983	0.509417	0.499235	0.594101	0.424135	0.602396	0.509527	0.622935	0.668203	0.711567	0.81282	0.784624	0.809515	0.736757	0.906598	0.344387	0.381939	0.537242	0.61436	0.746771	0.384889	0.677981	0.654017	0.790697	0.744019	0.691893	0.823405	0.77384	0.804994	0.713072	0.896574	0.0289114
341	0.348523	0.390114	0.437806	0.434373	0.519162	0.411832	0.562064	0.487482	0.549176	0.60816	0.702883	0.791823	0.781675	0.789026	0.732692	0.895097	0.35099	0.389712	0.509218	0.498959	0.593879	0.423846	0.602061	0.509204	0.622728	0.667931	0.711179	0.812563	0.784302	0.809272	0.73637	0.906412	0.344182	0.381757	0.537061	0.6142	0.746633	0.384461	0.677739	0.653804	0.790496	0.743471	0.691563	0.823138	0.773517	0.804702	0.712753	0.896306	0.0286567
342	0.348318	0.389925	0.437624	0.434135	0.518969	0.411571	0.561625	0.487197	0.548813	0.607854	0.702628	0.791642	0.781329	0.788849	0.732327	0.89492	0.350743	0.389486	0.508968	0.498785	0.593661	0.423508	0.60163	0.508925	0.622493	0.667674	0.710859	0.812368	0.784066	0.809055	0.736087	0.906254	0.343946	0.381488	0.536731	0.613915	0.746496	0.384161	0.677362	0.653522	0.790281	0.742912	0.691254	0.822833	0.773221	0.804363	0.712391	0.896069	0.0284241
343	0.348086	0.389677	0.437429	0.43398	0.518766	0.411365	0.561233	0.486904	0.548555	0.607572	0.702385	0.791378	0.781058	0.788584	0.732104	0.894655	0.350539	0.389257	0.508765	0.498594	0.593475	0.423272	0.601281	0.508633	0.622258	0.667419	0.710544	0.812143	0.783745	0.808765	0.735812	0.906041	0.343747	0.381214	0.536511	0.613699	0.746298	0.383875	0.677024	0.653339	0.790107	0.742421	0.690992	0.822564	0.772833	0.803907	0.712011	0.895776	0.0282233
344	0.347875	0.389355	0.43728	0.433737	0.518559	0.411117	0.560875	0.486552	0.548261	0.607338	0.702097	0.791131	0.780784	0.788355	0.731865	0.894501	0.350351	0.388971	0.508538	0.498362	0.593311	0.422977	0.60077	0.508301	0.621974	0.667181	0.710267	0.811937	0.783365	0.80851	0.735471	0.905849	0.343536	0.380942	0.536293	0.613532	0.746112	0.383509	0.676702	0.653069	0.789848	0.741814	0.690748	0.822242	0.772474	0.803552	0.71173	0.895466	0.0279506
345	0.347654	0.389137	0.437034	0.433555	0.518357	0.410845	0.560574	0.486271	0.548022	0.607068	0.701837	0.790873	0.780539	0.788022	0.731579	0.894334	0.350172	0.388772	0.50835	0.498223	0.593017	0.422654	0.60051	0.507981	0.621775	0.666961	0.709896	0.811723	0.783065	0.808139	0.73506	0.905666	0.343251	0.38076	0.536096	0.613257	0.745953	0.383165	0.67636	0.652829	0.789624	0.741332	0.690428	0.821967	0.772212	0.803138	0.7111	0.895155	0.0276781
346	0.347459	0.38889	0.436836	0.433324	0.51812	0.410573	0.560236	0.486021	0.547743	0.606784	0.701539	0.79068	0.780243	0.787856	0.731223	0.894118	0.349975	0.388502	0.508194	0.498026	0.592811	0.422323	0.600223	0.507717	0.621564	0.666728	0.709574	0.811489	0.782824	0.80789	0.734677	0.905496	0.343002	0.380455	0.535945	0.612984	0.745743	0.382843	0.675985	0.652633	0.789459	0.740795	0.689992	0.821808	0.771728	0.802819	0.710731	0.894921	0.0275157
347	0.347287	0.388653	0.436671	0.433148	0.517828	0.410349	0.559868	0.485751	0.547505	0.606561	0.701258	0.790418	0.779883	0.787667	0.730934	0.893903	0.349809	0.388225	0.507966	0.49777	0.592582	0.422041	0.599907	0.507442	0.621301	0.666419	0.709259	0.811253	0.782543	0.8077	0.734333	0.905318	0.342786	0.380111	0.535717	0.612821	0.745598	0.382578	0.675654	0.652396	0.789306	0.740259	0.689673	0.821443	0.771321	0.802529	0.71035	0.894698	0.0272982
348	0.347132	0.388337	0.436462	0.432922	0.517617	0.410061	0.559515	0.485458	0.547201	0.606255	0.700963	0.790188	0.779583	0.787424	0.730678	0.89371	0.349563	0.387948	0.507763	0.49743	0.592388	0.421832	0.599548	0.507094	0.621051	0.666142	0.70887	0.811031	0.782179	0.807477	0.734038	0.905144	0.342563	0.379863	0.535524	0.612625	0.745463	0.382217	0.675394	0.652222	0.789127	0.739832	0.689368	0.821231	0.770936	0.802222	0.709959	0.89439	0.0270403
349	0.346952	0.388117	0.436299	0.432754	0.517403	0.409869	0.559133	0.485162	0.546975	0.606019	0.700763	0.789961	0.779309	0.787126	0.730413	0.893564	0.349411	0.387723	0.507556	0.497238	0.592204	0.421539	0.599266	0.506761	0.620748	0.665933	0.708593	0.810845	0.781914	0.807204	0.733683	0.90498	0.342361	0.379516	0.53537	0.612408	0.745281	0.38184	0.675092	0.651956	0.788974	0.739431	0.688955	0.820998	0.770649	0.801996	0.709567	0.894103	0.0268262
350	0.346736	0.387897	0.436067	0.432537	0.517265	0.40965	0.558748	0.484847	0.546722	0.605775	0.700451	0.789689	0.779087	0.78689	0.730035	0.893372	0.349228	0.387425	0.507285	0.497031	0.592006	0.421196	0.598993	0.506412	0.620475	0.665596	0.708163	0.810591	0.781623	0.806997	0.73336	0.904754	0.342145	0.379273	0.535108	0.612184	0.745064	0.3815	0.674686	0.651809	0.788755	0.739011	0.688635	0.820729	0.77026	0.801729	0.709178	0.893809	0.0265296
351	0.346502	0.387612	0.435802	0.432276	0.517081	0.409362	0.558423	0.484603	0.546428	0.605536	0.700227	0.78942	0.778785	0.78663	0.7298	0.893188	0.348993	0.387227	0.507034	0.496869	0.59176	0.420958	0.598623	0.50604	0.620289	0.665352	0.707819	0.810439	0.781315	0.806726	0.733052	0.904586	0.341898	0.378977	0.534885	0.61191	0.744887	0.38123	0.674338	0.651633	0.788555	0.738521	0.68837	0.82046	0.769906	0.801432	0.708877	0.8936	0.0263182
352	0.346327	0.387393	0.435575	0.432065	0.516867	0.409074	0.558035	0.484318	0.546204	0.605262	0.699934	0.789114	0.778559	0.786425	0.729514	0.892968	0.348746	0.38699	0.506895	0.496629	0.591574	0.420673	0.598379	0.505734	0.620096	0.665059	0.707536	0.810249	0.781024	0.806495	0.732784	0.904413	0.341725	0.378799	0.534697	0.611617	0.74473	0.380961	0.673997	0.651364	0.78832	0.738067	0.687916	0.820144	0.769501	0.801139	0.708447	0.893326	0.0260662
353	0.346103	0.387193	0.435456	0.431851	0.516717	0.408781	0.557696	0.483995	0.545928	0.604985	0.699615	0.788879	0.778251	0.786236	0.729239	0.892816	0.348553	0.386778	0.506711	0.496418	0.59134	0.420393	0.598027	0.505429	0.619854	0.664801	0.707174	0.810023	0.780738	0.806226	0.732501	0.90421	0.341472	0.378522	0.534517	0.611291	0.744574	0.380618	0.673542	0.651171	0.788197	0.737614	0.68765	0.819913	0.769177	0.800851	0.707987	0.893146	0.0258715
354	0.345857	0.386937	0.435264	0.4316	0.516493	0.408525	0.557335	0.483678	0.545544	0.604715	0.699312	0.788678	0.777963	0.78598	0.728934	0.892617	0.348309	0.386606	0.506495	0.496216	0.59115	0.420105	0.59766	0.50512	0.619595	0.664597	0.70689	0.809687	0.780459	0.805923	0.732263	0.904028	0.341238	0.378293	0.534301	0.611022	0.744444	0.380297	0.673287	0.650999	0.787955	0.73713	0.687247	0.819624	0.768821	0.80056	0.707497	0.892875	0.0256024
355	0.345693	0.386734	0.435079	0.431366	0.516288	0.40826	0.557043	0.483399	0.545336	0.604409	0.699033	0.78844	0.777646	0.785736	0.728657	0.892423	0.348109	0.386397	0.506321	0.495983	0.590953	0.419832	0.597383	0.504894	0.619379	0.664263	0.706574	0.809415	0.780187	0.805641	0.731956	0.903862	0.340966	0.377997	0.534106	0.610838	0.744328	0.38004	0.672955	0.650778	0.787767	0.736708	0.686854	0.819269	0.768471	0.800219	0.707076	0.892609	0.0252853
356	0.345505	0.386517	0.434893	0.431122	0.516112	0.408078	0.556637	0.483132	0.54501	0.604142	0.698675	0.788221	0.777404	0.785495	0.728361	0.892198	0.347912	0.386174	0.506156	0.495821	0.590702	0.419578	0.596961	0.504625	0.619167	0.663976	0.706272	0.809175	0.77993	0.805443	0.731605	0.903652	0.340774	0.377759	0.533822	0.610632	0.744162	0.379731	0.672631	0.650529	0.787565	0.736197	0.68659	0.818915	0.768149	0.799891	0.706608	0.892295	0.0250286
357	0.345318	0.386294	0.434747	0.430909	0.515873	0.40785	0.556308	0.482799	0.544694	0.603944	0.698388	0.788054	0.777124	0.785245	0.728031	0.892038	0.347706	0.385923	0.50595	0.495636	0.590463	0.419297	0.596679	0.50436	0.618995	0.663725	0.706011	0.808993	0.779651	0.80516	0.731336	0.903518	0.340632	0.377521	0.533629	0.61038	0.744007	0.37943	0.672302	0.650291	0.787402	0.735746	0.686237	0.818649	0.767869	0.799541	0.706122	0.892037	0.0247817
358	0.345107	0.38611	0.434559	0.430705	0.515722	0.407573	0.555984	0.482458	0.544312	0.603697	0.698019	0.787816	0.776794	0.784951	0.727741	0.891873	0.347517	0.385682	0.505695	0.495474	0.590269	0.419015	0.596262	0.503969	0.618747	0.663476	0.705738	0.808788	0.779375	0.804852	0.731027	0.903323	0.340435	0.377277	0.533378	0.61013	0.743817	0.379066	0.671983	0.650111	0.787241	0.735196	0.686009	0.818425	0.767571	0.799258	0.70577	0.891776	0.0244393
359	0.344909	0.385874	0.434296	0.430449	0.515575	0.407364	0.555628	0.482183	0.543934	0.603393	0.697766	0.787593	0.776553	0.784642	0.727519	0.891672	0.347365	0.38543	0.505526	0.495241	0.59006	0.418734	0.595948	0.503749	0.618495	0.663206	0.705395	0.808509	0.779142	0.804606	0.730661	0.903165	0.340282	0.37696	0.533104	0.609923	0.743663	0.378691	0.671674	0.649844	0.786982	0.734797	0.685701	0.818124	0.767195	0.798851	0.705464	0.891554	0.0242584
360	0.344697	0.385595	0.434044	0.430242	0.515365	0.407135	0.555236	0.481931	0.543636	0.60318	0.697415	0.787381	0.776282	0.784384	0.727255	0.891468	0.347239	0.385146	0.505302	0.49507	0.589829	0.41847	0.595526	0.503515	0.618251	0.662988	0.704992	0.808291	0.778732	0.80438	0.730344	0.902997	0.340091	0.376754	0.53292	0.609719	0.743494	0.378306	0.67134	0.649571	0.786698	0.734271	0.685333	0.817876	0.766901	0.79846	0.705163	0.89127	0.0240564
361	0.34456	0.385371	0.433843	0.430071	0.515115	0.40695	0.554913	0.481589	0.543388	0.602932	0.697043	0.787145	0.775968	0.784137	0.726944	0.891284	0.347068	0.384928	0.505086	0.49488	0.589609	0.418185	0.595241	0.503209	0.618002	0.662706	0.704612	0.808098	0.778369	0.804105	0.729994	0.902827	0.339881	0.376515	0.532691	0.609465	0.743341	0.377999	0.671075	0.649339	0.786447	0.733744	0.684968	0.817534	0.7665	0.798118	0.704811	0.890952	0.0238565
362	0.344329	0.385229	0.433602	0.429892	0.514922	0.406728	0.554554	0.481249	0.54314	0.602713	0.696795	0.786923	0.775693	0.783794	0.726685	0.891127	0.34685	0.38475	0.504906	0.49473	0.589392	0.417869	0.594967	0.50296	0.617707	0.662384	0.704397	0.807894	0.778095	0.803881	0.729737	0.902646	0.339632	0.376261	0.532512	0.609203	0.743195	0.377635	0.670732	0.649138	0.786213	0.733273	0.684613	0.81729	0.766163	0.797809	0.704513	0.890747	0.0237022
363	0.344091	0.38504	0.433388	0.429687	0.514753	0.406525	0.554212	0.480927	0.542847	0.602435	0.6965	0.786713	0.775401	0.783527	0.726391	0.890918	0.346653	0.384514	0.504673	0.494541	0.589154	0.417595	0.59464	0.502772	0.617515	0.662091	0.704085	0.807688	0.777794	0.803659	0.72931	0.902488	0.339456	0.376031	0.532234	0.609007	0.743031	0.377263	0.670354	0.648902	0.785976	0.732852	0.684272	0.81698	0.765701	0.797507	0.704142	0.890519	0.0234797
364	0.343814	0.384798	0.4332	0.42944	0.514568	0.406363	0.553794	0.480649	0.542555	0.602103	0.696204	0.786526	0.775102	0.783272	0.726106	0.890801	0.346456	0.384244	0.504464	0.494341	0.589017	0.417226	0.594316	0.50245	0.617137	0.661825	0.703728	0.807437	0.777517	0.803354	0.728972	0.902361	0.339256	0.375819	0.532045	0.608786	0.742831	0.376887	0.669934	0.648702	0.785785	0.73218	0.684013	0.816715	0.765299	0.79721	0.70373	0.890235	0.0231642
365	0.343605	0.384476	0.432978	0.429254	0.514352	0.406125	0.553517	0.480396	0.542327	0.601854	0.695905	0.786329	0.774804	0.783058	0.725803	0.890649	0.346267	0.384006	0.504272	0.494108	0.588869	0.416953	0.594085	0.502122	0.616847	0.661614	0.703441	0.807221	0.777151	0.803125	0.728728	0.902208	0.339009	0.375621	0.531843	0.608604	0.742651	0.376668	0.66964	0.648491	0.785604	0.731722	0.683563	0.816491	0.76496	0.79685	0.703392	0.889963	0.0229373
366	0.343429	0.384223	0.432686	0.429092	0.514176	0.405914	0.553271	0.480121	0.542042	0.601573	0.6956	0.786125	0.774511	0.782825	0.725497	0.890451	0.346126	0.383734	0.50406	0.493887	0.58869	0.416746	0.593788	0.501875	0.616596	0.661374	0.703085	0.807024	0.776838	0.802822	0.728344	0.902094	0.338862	0.375348	0.53167	0.608366	0.74248	0.37632	0.669382	0.648186	0.785426	0.731357	0.683184	0.816222	0.764649	0.796538	0.702972	0.889703	0.0226866
367	0.343195	0.384009	0.4325	0.428916	0.513923	0.405716	0.553001	0.479908	0.541704	0.60129	0.695302	0.785814	0.774252	0.782547	0.725207	0.890293	0.345925	0.38354	0.503819	0.493754	0.588488	0.416472	0.593491	0.501531	0.616375	0.661182	0.702789	0.8068	0.776479	0.802573	0.728121	0.901862	0.338674	0.375066	0.531448	0.608102	0.742309	0.376051	0.669111	0.647906	0.785201	0.730952	0.682891	0.815927	0.764278	0.796122	0.702782	0.889509	0.022483
368	0.342977	0.383808	0.432352	0.428757	0.513721	0.405458	0.552737	0.479674	0.541409	0.601059	0.69507	0.785634	0.773943	0.782269	0.724908	0.890071	0.34571	0.383334	0.503632	0.49357	0.588279	0.416169	0.593127	0.50128	0.616068	0.660907	0.702496	0.806565	0.776224	0.802264	0.727763	0.901693	0.338443	0.374774	0.531236	0.607911	0.742121	0.375754	0.668771	0.647654	0.78499	0.730551	0.682517	0.815609	0.76399	0.795754	0.702325	0.889211	0.0223382
369	0.342867	0.383565	0.432168	0.428531	0.513505	0.405245	0.552411	0.479283	0.541048	0.600828	0.69477	0.785458	0.773642	0.782016	0.724618	0.889913	0.345552	0.383115	0.503452	0.493387	0.588086	0.415939	0.592811	0.500956	0.615716	0.660674	0.702201	0.806326	0.775935	0.802045	0.727469	0.901536	0.338227	0.374439	0.530948	0.607705	0.741914	0.375385	0.668469	0.647471	0.784796	0.73014	0.682159	0.815253	0.763659	0.795378	0.701972	0.888997	0.0221793
370	0.342665	0.38332	0.431902	0.428347	0.513287	0.405044	0.55204	0.479078	0.54079	0.600499	0.694474	0.785215	0.77332	0.781788	0.724376	0.889728	0.34534	0.382944	0.50324	0.493206	0.587914	0.4156	0.592548	0.500708	0.61552	0.660431	0.701871	0.806052	0.775629	0.801777	0.72718	0.90133	0.337976	0.374198	0.530756	0.607427	0.741781	0.375067	0.668177	0.647265	0.784574	0.72964	0.681893	0.815006	0.763309	0.795082	0.701612	0.888788	0.0219289
371	0.34243	0.383097	0.431719	0.428107	0.513114	0.404821	0.551674	0.478847	0.540508	0.60017	0.694196	0.785002	0.773113	0.781566	0.724088	0.889577	0.345163	0.382707	0.503001	0.493032	0.587701	0.41529	0.592126	0.500445	0.615267	0.660211	0.701573	0.805712	0.775337	0.801454	0.726792	0.901168	0.337792	0.373968	0.530527	0.607226	0.741595	0.374761	0.667894	0.647005	0.784389	0.729264	0.681591	0.814727	0.76282	0.794813	0.701246	0.888577	0.0217049
372	0.342152	0.382872	0.431503	0.427942	0.512921	0.404605	0.551332	0.478575	0.540233	0.599899	0.69388	0.784764	0.772845	0.781294	0.723842	0.889427	0.345002	0.382494	0.502743	0.492775	0.587493	0.414984	0.59169	0.500057	0.614991	0.659968	0.701262	0.805498	0.775073	0.801192	0.726424	0.900958	0.337616	0.373717	0.530283	0.607041	0.741471	0.374517	0.66763	0.64683	0.784206	0.728747	0.681316	0.814414	0.76253	0.794517	0.700902	0.888311	0.021559
373	0.341951	0.382644	0.431312	0.427674	0.512726	0.40437	0.550905	0.47831	0.539992	0.599691	0.693508	0.784546	0.772445	0.78107	0.723438	0.889266	0.344862	0.382278	0.502511	0.492569	0.587285	0.414733	0.591379	0.499739	0.614791	0.659738	0.700951	0.805234	0.774791	0.800946	0.726136	0.900765	0.33742	0.373463	0.530058	0.606792	0.741314	0.374207	0.667331	0.646646	0.784069	0.728298	0.680987	0.814202	0.762168	0.794212	0.700454	0.888066	0.02132
374	0.341734	0.382429	0.431142	0.427461	0.512497	0.40414	0.550596	0.478092	0.539734	0.599427	0.693179	0.784335	0.772144	0.780814	0.723195	0.889109	0.34463	0.382044	0.502355	0.492374	0.587054	0.414475	0.591079	0.499432	0.614587	0.65948	0.700676	0.804965	0.774504	0.800622	0.725836	0.900601	0.337216	0.373253	0.529795	0.606577	0.74115	0.373894	0.667035	0.64645	0.783839	0.727759	0.680541	0.813971	0.761915	0.79392	0.700092	0.887814	0.0211501
375	0.341536	0.382228	0.430919	0.427223	0.512352	0.403945	0.550255	0.477816	0.539486	0.599077	0.692909	0.78413	0.771926	0.780544	0.722873	0.888909	0.344448	0.381797	0.502224	0.492148	0.586854	0.414245	0.590753	0.499128	0.614381	0.659193	0.700411	0.804784	0.774124	0.800392	0.72549	0.900422	0.337013	0.372994	0.529576	0.606389	0.741009	0.373611	0.666541	0.646273	0.783677	0.727422	0.680182	0.813635	0.761572	0.793597	0.699714	0.887579	0.0210154
376	0.341344	0.381978	0.430728	0.427047	0.512127	0.403683	0.549944	0.477515	0.539218	0.598838	0.692579	0.783837	0.771626	0.780291	0.722605	0.888683	0.344226	0.381605	0.502016	0.491998	0.586645	0.413929	0.590325	0.49881	0.614146	0.658889	0.700094	0.804612	0.773849	0.800147	0.725228	0.900228	0.336811	0.372759	0.529363	0.606158	0.740869	0.373306	0.666155	0.646081	0.783519	0.726994	0.679791	0.813322	0.761137	0.793359	0.699362	0.887275	0.0208021
377	0.341102	0.381807	0.430537	0.426767	0.511952	0.403479	0.549621	0.477128	0.538942	0.598515	0.692413	0.783598	0.771334	0.780042	0.722286	0.888521	0.344065	0.381429	0.501806	0.491777	0.586458	0.413666	0.589998	0.498521	0.61386	0.658674	0.699811	0.804401	0.773471	0.799925	0.72487	0.900038	0.336632	0.372526	0.529176	0.606002	0.740734	0.37306	0.665811	0.645853	0.783339	0.726441	0.679487	0.813025	0.760785	0.792963	0.698883	0.887022	0.0206315
378	0.340913	0.381517	0.430288	0.426547	0.51179	0.403287	0.549288	0.476788	0.538644	0.598261	0.692123	0.783387	0.771041	0.77973	0.722002	0.888339	0.343855	0.381195	0.501636	0.491536	0.586243	0.413354	0.589646	0.498202	0.613629	0.658358	0.699547	0.804215	0.773204	0.799706	0.724657	0.899866	0.336442	0.372292	0.528979	0.605788	0.740593	0.372852	0.665486	0.645614	0.783172	0.725964	0.679075	0.812805	0.760483	0.792628	0.698532	0.886788	0.0204011
379	0.340709	0.381348	0.430084	0.42637	0.511601	0.403046	0.548982	0.476461	0.538383	0.598002	0.691794	0.783159	0.770808	0.779413	0.721778	0.888177	0.343715	0.380924	0.501497	0.491286	0.586009	0.413084	0.589406	0.497853	0.613356	0.658182	0.699292	0.80389	0.772888	0.799447	0.724411	0.899697	0.336204	0.372006	0.528746	0.605554	0.740427	0.372467	0.664985	0.645373	0.782962	0.725573	0.678642	0.812568	0.760144	0.792366	0.698195	0.886465	0.0201728
380	0.340454	0.381124	0.429901	0.426197	0.51137	0.402804	0.548695	0.476117	0.538076	0.597775	0.691496	0.782993	0.770574	0.779183	0.721494	0.887962	0.343556	0.380662	0.501248	0.491142	0.5858	0.412748	0.589185	0.497542	0.613161	0.657929	0.698956	0.803624	0.77261	0.799076	0.724071	0.899521	0.336005	0.37174	0.528538	0.605248	0.740252	0.37212	0.664637	0.645114	0.782775	0.724868	0.678329	0.812323	0.759717	0.791966	0.697866	0.88619	0.020005
381	0.34024	0.380886	0.429703	0.42597	0.511186	0.402573	0.548408	0.47585	0.537757	0.597521	0.691204	0.782757	0.770321	0.778945	0.721275	0.887772	0.343361	0.380467	0.500976	0.490933	0.585601	0.412453	0.588865	0.49719	0.612841	0.657613	0.698623	0.803398	0.772304	0.798895	0.723793	0.899364	0.335803	0.37146	0.528344	0.60501	0.740084	0.371795	0.664318	0.644896	0.78259	0.724489	0.677975	0.812098	0.759394	0.791604	0.69745	0.885826	0.0198374
382	0.340035	0.380701	0.429527	0.425783	0.510938	0.402296	0.548085	0.475597	0.537441	0.597309	0.690971	0.782528	0.770012	0.778635	0.720937	0.887601	0.343182	0.380273	0.500791	0.49077	0.585456	0.412184	0.588623	0.496927	0.612609	0.657373	0.698259	0.803197	0.771965	0.798623	0.723487	0.899176	0.335622	0.371216	0.52814	0.604789	0.739866	0.371516	0.664059	0.644643	0.782404	0.723968	0.677632	0.811863	0.759059	0.791267	0.697099	0.885523	0.0196144
383	0.33981	0.380457	0.429339	0.425561	0.510738	0.402027	0.547654	0.475289	0.537149	0.597087	0.690701	0.782334	0.769694	0.778379	0.72069	0.887468	0.343044	0.380018	0.500564	0.49061	0.585246	0.411969	0.588161	0.496681	0.612273	0.65703	0.697955	0.802978	0.771677	0.798325	0.723268	0.898988	0.335386	0.370949	0.527985	0.604565	0.73974	0.371242	0.663689	0.644402	0.78208	0.723549	0.677348	0.811574	0.758729	0.790891	0.696732	0.885269	0.0193922
384	0.339641	0.380242	0.429169	0.425421	0.510537	0.401814	0.547375	0.47496	0.536889	0.596772	0.690378	0.78214	0.769352	0.778107	0.720422	0.887231	0.342879	0.379792	0.500384	0.49039	0.585056	0.411678	0.587892	0.496469	0.611972	0.656765	0.697644	0.802729	0.771503	0.798017	0.722995	0.898762	0.335183	0.370698	0.527686	0.604308	0.739574	0.370943	0.663305	0.644237	0.781849	0.723133	0.677032	0.81131	0.75837	0.790554	0.696439	0.885034	0.019266
385	0.339439	0.379986	0.428974	0.425233	0.510341	0.40158	0.547031	0.474726	0.53664	0.596527	0.690129	0.781942	0.769101	0.777826	0.720029	0.887081	0.342671	0.37955	0.500196	0.490193	0.584885	0.41136	0.587497	0.496117	0.611753	0.656481	0.697226	0.802555	0.771204	0.797731	0.72278	0.898552	0.33502	0.370396	0.527465	0.604083	0.739435	0.370566	0.66301	0.643989	0.781661	0.722536	0.676748	0.811065	0.758061	0.790148	0.696057	0.884786	0.0190566
386	0.339202	0.37975	0.428773	0.425	0.510153	0.401243	0.54673	0.474388	0.536418	0.596231	0.689897	0.781665	0.768836	0.777612	0.719792	0.886892	0.342447	0.379325	0.500053	0.489996	0.584709	0.411113	0.587195	0.495782	0.611497	0.656188	0.69695	0.802384	0.770936	0.797472	0.722562	0.898388	0.33485	0.370139	0.527262	0.603784	0.739236	0.370297	0.66267	0.643799	0.78139	0.722074	0.676369	0.810747	0.757769	0.789754	0.695726	0.884515	0.0188661
387	0.339051	0.379551	0.428561	0.424812	0.509946	0.401008	0.5465	0.474145	0.536141	0.595963	0.689634	0.781424	0.768501	0.777397	0.719523	0.886738	0.342229	0.379129	0.499876	0.489835	0.584566	0.410883	0.586869	0.495367	0.611299	0.655956	0.696716	0.802101	0.770595	0.797153	0.722186	0.89824	0.334679	0.369895	0.527031	0.603548	0.739064	0.369976	0.662422	0.643599	0.781243	0.721638	0.676038	0.810461	0.757514	0.789505	0.695397	0.884199	0.0186379
388	0.338849	0.379375	0.428352	0.424586	0.509745	0.400744	0.546224	0.473828	0.53592	0.595675	0.689273	0.78121	0.768243	0.777118	0.719246	0.886602	0.342054	0.378939	0.499709	0.489646	0.584396	0.410613	0.586584	0.495136	0.611015	0.655764	0.69637	0.801926	0.770329	0.796975	0.721888	0.898044	0.334407	0.369721	0.526785	0.603343	0.738934	0.369592	0.662048	0.643385	0.781034	0.721018	0.675748	0.810217	0.757105	0.789239	0.695078	0.883955	0.0184428
389	0.338675	0.379183	0.428151	0.424317	0.509541	0.400508	0.545834	0.473489	0.535735	0.595446	0.688959	0.7809	0.767958	0.776756	0.718916	0.886402	0.341879	0.37865	0.499543	0.489466	0.584193	0.410314	0.586273	0.494819	0.610799	0.655479	0.696128	0.801644	0.770109	0.796649	0.721651	0.897887	0.334209	0.369491	0.526596	0.603121	0.738792	0.369287	0.661713	0.643173	0.780829	0.720573	0.675409	0.809914	0.75665	0.789046	0.694567	0.883702	0.018194
390	0.338493	0.378962	0.427935	0.424142	0.50936	0.400321	0.545427	0.473105	0.535512	0.595238	0.688673	0.780682	0.767713	0.776565	0.718706	0.886167	0.341741	0.378375	0.499324	0.489288	0.584	0.410025	0.585927	0.49447	0.610605	0.65527	0.695918	0.801434	0.769851	0.796405	0.721343	0.897723	0.334015	0.369261	0.526441	0.602798	0.738657	0.369049	0.661433	0.643014	0.780595	0.720226	0.675056	0.809688	0.756295	0.78882	0.694232	0.883406	0.0180311
391	0.338263	0.378704	0.427715	0.423901	0.509197	0.400036	0.545127	0.47277	0.535297	0.595011	0.688338	0.780434	0.767503	0.776332	0.718494	0.886015	0.34157	0.378181	0.499148	0.489083	0.583852	0.409768	0.585627	0.494231	0.61034	0.65497	0.695674	0.801164	0.769557	0.796093	0.721053	0.897591	0.333804	0.369041	0.526199	0.602603	0.738503	0.368608	0.661084	0.642735	0.780402	0.719592	0.674694	0.80945	0.755966	0.788574	0.693932	0.882996	0.017869
392	0.338112	0.378499	0.427503	0.423715	0.508995	0.399785	0.544765	0.472561	0.534981	0.594777	0.688045	0.780278	0.767185	0.776073	0.718241	0.885837	0.341365	0.377965	0.498956	0.488842	0.583664	0.409425	0.585307	0.493909	0.61014	0.654639	0.695424	0.800888	0.769254	0.795759	0.720748	0.897436	0.333641	0.368769	0.525993	0.602416	0.738366	0.368275	0.660769	0.642508	0.780238	0.71919	0.674382	0.809147	0.755635	0.788315	0.69358	0.882808	0.0177309
393	0.337861	0.378314	0.42736	0.423476	0.508818	0.399517	0.544438	0.472286	0.534747	0.594534	0.687731	0.780092	0.766931	0.775812	0.717999	0.885655	0.341116	0.377777	0.498782	0.488587	0.583508	0.409136	0.585015	0.49366	0.609823	0.65431	0.695053	0.800682	0.768988	0.795461	0.720452	0.897228	0.333459	0.368565	0.525784	0.602144	0.738219	0.368013	0.660493	0.642353	0.780054	0.71875	0.674061	0.808908	0.755287	0.788062	0.693277	0.882541	0.0175212
394	0.337648	0.37809	0.427176	0.423289	0.508626	0.399318	0.544156	0.472044	0.534549	0.594244	0.687431	0.779852	0.76666	0.775557	0.717747	0.885466	0.341006	0.377582	0.498598	0.488454	0.583312	0.40891	0.584742	0.493394	0.609644	0.654049	0.694782	0.800516	0.768661	0.795198	0.720108	0.897074	0.333237	0.368329	0.525534	0.601889	0.738022	0.367681	0.660183	0.642065	0.779815	0.718283	0.673737	0.808699	0.754918	0.787676	0.692961	0.882344	0.017376
395	0.337459	0.377908	0.426964	0.423095	0.508445	0.399116	0.543832	0.471769	0.534236	0.593956	0.687202	0.779649	0.766461	0.775234	0.717518	0.885348	0.340766	0.377344	0.498392	0.488248	0.583116	0.408575	0.584527	0.493083	0.609462	0.653851	0.694462	0.800302	0.768383	0.794913	0.719782	0.89687	0.332958	0.368074	0.525315	0.60167	0.737863	0.367403	0.659893	0.641851	0.779675	0.717831	0.673374	0.80841	0.754603	0.787402	0.692627	0.882134	0.0172374
396	0.337247	0.377698	0.426754	0.422895	0.508226	0.398919	0.54357	0.471484	0.533947	0.593743	0.686915	0.779365	0.766152	0.775015	0.717203	0.885192	0.340593	0.377077	0.498218	0.488029	0.582928	0.408283	0.584215	0.492772	0.609218	0.653578	0.694216	0.800125	0.768075	0.794608	0.719515	0.896692	0.332756	0.367917	0.525141	0.601481	0.737686	0.367004	0.659561	0.641667	0.779497	0.717262	0.673064	0.808126	0.754214	0.787211	0.692251	0.881856	0.0170273
397	0.337027	0.377491	0.426523	0.422694	0.508045	0.398572	0.543264	0.471252	0.5337	0.593433	0.686646	0.779151	0.765842	0.774802	0.716917	0.885016	0.340394	0.376843	0.497997	0.487809	0.582722	0.408027	0.583935	0.492485	0.609016	0.653345	0.693928	0.799918	0.767768	0.794335	0.719163	0.896545	0.332485	0.367666	0.524896	0.601208	0.737463	0.366623	0.659223	0.641464	0.779285	0.716845	0.672694	0.807845	0.753926	0.786928	0.691869	0.881579	0.0168418
398	0.336773	0.377259	0.426262	0.422479	0.507837	0.398351	0.542958	0.470988	0.533451	0.593218	0.686406	0.778915	0.765607	0.774529	0.716651	0.884838	0.340215	0.376627	0.497812	0.487642	0.582539	0.407703	0.58361	0.492231	0.608809	0.65303	0.693679	0.799746	0.767508	0.794069	0.718862	0.896399	0.332303	0.367436	0.524706	0.601026	0.737314	0.366221	0.658935	0.641257	0.779086	0.716365	0.672409	0.807547	0.753555	0.786631	0.691353	0.881361	0.0166463
399	0.336576	0.377069	0.426108	0.422262	0.50766	0.398067	0.542694	0.470644	0.533161	0.592868	0.686132	0.778704	0.76538	0.774324	0.716422	0.884683	0.340029	0.376449	0.49766	0.487414	0.582383	0.407505	0.583267	0.492001	0.608549	0.652765	0.693282	0.799567	0.767245	0.793863	0.718574	0.89624	0.332144	0.367215	0.524498	0.60086	0.737145	0.365865	0.658657	0.641056	0.778905	0.715817	0.672018	0.807353	0.753262	0.786389	0.690932	0.881112	0.0164922
400	0.336389	0.376818	0.425941	0.422041	0.50748	0.39786	0.542395	0.470347	0.532907	0.592639	0.685819	0.778485	0.765156	0.774087	0.716155	0.884446	0.3398	0.376244	0.497444	0.487229	0.582166	0.407183	0.582953	0.491675	0.608266	0.652539	0.693032	0.799349	0.766889	0.793647	0.718212	0.896047	0.331951	0.367012	0.524319	0.600663	0.736967	0.365595	0.658304	0.64082	0.778715	0.715343	0.671742	0.807124	0.752931	0.786074	0.690555	0.880864	0.0163293
401	0.336142	0.376567	0.425775	0.421844	0.507201	0.397595	0.542065	0.470083	0.532671	0.59242	0.685592	0.778322	0.764819	0.773898	0.715821	0.884279	0.339597	0.376028	0.49724	0.487036	0.581966	0.406941	0.582536	0.491324	0.608057	0.652332	0.692707	0.799116	0.766617	0.793366	0.717951	0.895902	0.331779	0.36676	0.524077	0.60045	0.736849	0.365344	0.658102	0.640618	0.778548	0.714873	0.671412	0.806887	0.752575	0.785692	0.690206	0.880661	0.0161351
402	0.335905	0.376348	0.425592	0.421644	0.507027	0.397363	0.541797	0.469775	0.532387	0.592192	0.685281	0.778152	0.764515	0.773548	0.71555	0.884105	0.33941	0.375806	0.49704	0.48686	0.581757	0.406607	0.582262	0.49106	0.607783	0.652136	0.692418	0.798919	0.766283	0.793056	0.717677	0.895695	0.331656	0.366505	0.523863	0.600243	0.736712	0.365136	0.657639	0.640468	0.778305	0.714446	0.671073	0.806628	0.752328	0.785315	0.689892	0.880382	0.0159992
403	0.335736	0.376119	0.425398	0.421495	0.506881	0.397131	0.541502	0.469468	0.532111	0.591911	0.685016	0.777962	0.764251	0.773313	0.715239	0.883936	0.339237	0.37555	0.496804	0.486723	0.581565	0.406325	0.582043	0.490766	0.607502	0.65187	0.692181	0.798742	0.766005	0.792789	0.717411	0.89546	0.331485	0.366273	0.523581	0.600048	0.736543	0.364874	0.65734	0.640273	0.778127	0.714078	0.67072	0.806321	0.751952	0.784992	0.68948	0.880127	0.0157726
404	0.335534	0.375893	0.425219	0.421287	0.506676	0.39686	0.541244	0.469272	0.531813	0.591646	0.684647	0.77777	0.763883	0.773039	0.715018	0.883755	0.339097	0.375318	0.496609	0.486561	0.581369	0.40602	0.58172	0.490556	0.607187	0.651665	0.691881	0.798522	0.765738	0.792514	0.717	0.895297	0.331279	0.366023	0.523405	0.599801	0.736387	0.364637	0.657043	0.640054	0.777965	0.713503	0.670346	0.806033	0.751647	0.784656	0.68914	0.879843	0.0156345
405	0.335315	0.375671	0.425013	0.421144	0.506487	0.396686	0.540865	0.469042	0.5315	0.591457	0.684304	0.777563	0.763615	0.772875	0.714676	0.88354	0.338924	0.375028	0.496402	0.486369	0.58121	0.405601	0.581312	0.490297	0.606932	0.651362	0.69158	0.798264	0.765433	0.792237	0.716668	0.895137	0.331081	0.365801	0.523181	0.599569	0.736279	0.364344	0.656704	0.639849	0.777722	0.713191	0.670126	0.80582	0.751374	0.784383	0.688776	0.879614	0.0155247
406	0.335089	0.375413	0.42479	0.420966	0.506278	0.396481	0.540507	0.468806	0.53116	0.591213	0.684099	0.777337	0.76336	0.772572	0.714322	0.883323	0.338728	0.374795	0.496229	0.486196	0.581051	0.405356	0.581028	0.489977	0.606693	0.651064	0.691304	0.798032	0.765186	0.792025	0.716286	0.894964	0.330894	0.365583	0.522978	0.599387	0.736113	0.364074	0.656438	0.639631	0.777531	0.712658	0.669768	0.805618	0.751033	0.78414	0.688404	0.879351	0.0154137
407	0.334911	0.375232	0.424533	0.420782	0.506107	0.396208	0.540255	0.468527	0.530926	0.591024	0.683913	0.777134	0.763027	0.772365	0.714059	0.88314	0.338561	0.37461	0.496068	0.486013	0.580841	0.40512	0.580794	0.489684	0.60652	0.650833	0.690994	0.797785	0.764922	0.791839	0.716009	0.894797	0.330719	0.365338	0.522762	0.599225	0.735927	0.363755	0.656148	0.639438	0.7773	0.712072	0.669494	0.80534	0.750703	0.783934	0.687992	0.87911	0.0153171
408	0.334738	0.375027	0.424329	0.420599	0.505935	0.395923	0.540007	0.468269	0.530661	0.590739	0.683616	0.776896	0.762729	0.772162	0.71379	0.882965	0.338352	0.37443	0.495895	0.485815	0.58058	0.404851	0.580531	0.489324	0.606355	0.650608	0.690741	0.797572	0.764685	0.791583	0.715726	0.894631	0.330531	0.365088	0.522549	0.599034	0.735785	0.363506	0.655782	0.639179	0.777079	0.711475	0.669059	0.805115	0.750316	0.783615	0.687668	0.878823	0.0151471
409	0.334554	0.3748	0.424119	0.420428	0.505748	0.395763	0.539703	0.468019	0.530429	0.590484	0.683378	0.776683	0.762437	0.771901	0.713531	0.882742	0.338153	0.374184	0.495725	0.485636	0.580391	0.404559	0.58016	0.488998	0.60615	0.650348	0.69044	0.79741	0.764447	0.79138	0.715446	0.894458	0.330382	0.364832	0.522277	0.59882	0.735614	0.363229	0.65551	0.63894	0.776819	0.710955	0.668812	0.804794	0.749999	0.783273	0.687392	0.878606	0.0149641
410	0.334363	0.37456	0.423908	0.420269	0.505551	0.395535	0.539302	0.467715	0.530178	0.590233	0.683117	0.776448	0.762185	0.771667	0.713236	0.882596	0.337967	0.373988	0.495554	0.485386	0.580202	0.404337	0.579899	0.488705	0.605905	0.650119	0.690133	0.797163	0.764178	0.791192	0.71506	0.894279	0.330207	0.364588	0.522098	0.598527	0.735415	0.362911	0.655161	0.638734	0.776538	0.710526	0.668507	0.804497	0.749658	0.782989	0.687045	0.878394	0.0147983
411	0.334177	0.374309	0.423658	0.419996	0.505351	0.39531	0.538887	0.467422	0.52986	0.589973	0.682872	0.776162	0.761906	0.771478	0.71289	0.88244	0.337771	0.373768	0.495342	0.485207	0.580065	0.404039	0.579566	0.488408	0.605709	0.649772	0.689839	0.796944	0.763809	0.790946	0.714786	0.894061	0.330008	0.364357	0.521893	0.598335	0.735262	0.36269	0.654907	0.638516	0.776321	0.710013	0.668172	0.804083	0.749254	0.782727	0.6866	0.878202	0.0145665
412	0.333969	0.374143	0.423457	0.419798	0.505183	0.395072	0.5386	0.467162	0.529651	0.589717	0.682603	0.776	0.761569	0.771288	0.712658	0.88222	0.337583	0.373583	0.495153	0.485019	0.579897	0.40377	0.579298	0.488164	0.605453	0.649555	0.689569	0.796716	0.763524	0.790644	0.714477	0.89388	0.329859	0.364166	0.521659	0.598133	0.735116	0.362466	0.654583	0.638312	0.776143	0.709419	0.667839	0.803768	0.748906	0.782485	0.686302	0.877955	0.0144229
413	0.333812	0.37395	0.423318	0.419581	0.504998	0.394824	0.538305	0.466883	0.5294	0.589401	0.682309	0.77575	0.761352	0.771078	0.712408	0.881989	0.337366	0.373346	0.494994	0.48487	0.579744	0.403545	0.578924	0.487847	0.605154	0.649331	0.689281	0.796393	0.763237	0.790443	0.714097	0.893742	0.329667	0.363989	0.521439	0.597876	0.73495	0.362123	0.654341	0.638097	0.775963	0.70865	0.667545	0.803468	0.748443	0.782202	0.685932	0.87773	0.0142981
414	0.333569	0.373756	0.423114	0.419378	0.504754	0.394612	0.538089	0.466576	0.529172	0.589153	0.682151	0.775549	0.761021	0.770823	0.712079	0.881809	0.33718	0.37315	0.494785	0.48466	0.579585	0.403232	0.578676	0.487594	0.604976	0.649107	0.688981	0.796219	0.76303	0.790203	0.71375	0.893545	0.329479	0.363768	0.521274	0.597703	0.734806	0.36181	0.654003	0.637895	0.775694	0.707842	0.667226	0.80316	0.748239	0.781871	0.685595	0.877417	0.0141218
415	0.333384	0.373554	0.422918	0.419219	0.504581	0.394424	0.537822	0.466237	0.528897	0.588937	0.681829	0.775348	0.760765	0.770539	0.71184	0.881618	0.337019	0.373003	0.49455	0.48443	0.579432	0.402954	0.578294	0.487245	0.604717	0.64888	0.688771	0.796038	0.76282	0.789984	0.713529	0.89342	0.329272	0.363554	0.521059	0.597532	0.734646	0.361551	0.653694	0.637678	0.775482	0.707447	0.666866	0.80288	0.747884	0.781602	0.685198	0.87713	0.0139889
416	0.333203	0.373357	0.42265	0.419056	0.504413	0.39422	0.537464	0.466002	0.528709	0.588762	0.681633	0.775045	0.760548	0.770292	0.711574	0.881437	0.336883	0.372802	0.494305	0.484242	0.579235	0.402708	0.577974	0.486967	0.60442	0.648631	0.688473	0.795815	0.762575	0.789757	0.713185	0.893272	0.329126	0.363313	0.520836	0.597302	0.734427	0.361228	0.65339	0.637474	0.775298	0.706818	0.666571	0.802633	0.74742	0.781264	0.684789	0.876864	0.0138166
417	0.333052	0.373144	0.422482	0.418847	0.504256	0.393944	0.537233	0.465734	0.528486	0.588498	0.681361	0.774836	0.760336	0.770066	0.711251	0.881295	0.33673	0.372588	0.494128	0.484042	0.579054	0.40241	0.577673	0.48664	0.604233	0.648443	0.688231	0.795604	0.762238	0.789576	0.712866	0.893035	0.328975	0.363095	0.520511	0.597107	0.734255	0.360911	0.653043	0.637171	0.775086	0.706345	0.666327	0.802361	0.747063	0.780874	0.68447	0.876627	0.0136929
418	0.332861	0.372921	0.422234	0.418661	0.504046	0.393724	0.536941	0.465521	0.528215	0.588255	0.68112	0.774673	0.760117	0.769768	0.71109	0.881055	0.336566	0.372404	0.493888	0.483821	0.578872	0.402149	0.577326	0.486427	0.604001	0.648256	0.687937	0.795351	0.76205	0.789313	0.712571	0.892847	0.328767	0.362838	0.520294	0.596887	0.734093	0.360689	0.652659	0.636965	0.774888	0.705874	0.665985	0.802141	0.746796	0.780579	0.684197	0.876369	0.0135508
419	0.332684	0.372747	0.422026	0.418487	0.503875	0.393506	0.536669	0.465285	0.52802	0.58803	0.680873	0.77448	0.759832	0.769539	0.710824	0.880846	0.336403	0.372253	0.493699	0.483637	0.578743	0.401892	0.57703	0.486192	0.603773	0.648031	0.687662	0.795108	0.76171	0.789101	0.712343	0.892701	0.328554	0.362604	0.520109	0.59672	0.733875	0.360449	0.652366	0.636731	0.774635	0.705294	0.665711	0.801817	0.746329	0.780272	0.683843	0.876126	0.0134088
420	0.332489	0.372525	0.421813	0.418282	0.503688	0.393215	0.536449	0.465068	0.527822	0.587767	0.680623	0.774226	0.759482	0.769271	0.710478	0.880651	0.336202	0.372076	0.493489	0.483465	0.5786	0.401612	0.576767	0.485899	0.603607	0.647746	0.687419	0.7949	0.761344	0.788891	0.7121	0.892491	0.328372	0.362379	0.5199	0.596555	0.733701	0.360099	0.651986	0.636532	0.774467	0.70488	0.665324	0.801514	0.746005	0.779978	0.68348	0.875819	0.0132698
421	0.33228	0.3724	0.421688	0.41814	0.503535	0.392932	0.53611	0.464817	0.527598	0.587563	0.680337	0.773986	0.759262	0.769038	0.710172	0.880426	0.335986	0.371871	0.493266	0.483349	0.578438	0.401338	0.576451	0.485551	0.603366	0.647533	0.687165	0.794692	0.761064	0.788558	0.711825	0.892328	0.328191	0.362114	0.519697	0.596342	0.73353	0.359773	0.651594	0.636356	0.774268	0.704448	0.665017	0.801275	0.745684	0.779648	0.683145	0.875568	0.0131228
422	0.332073	0.372233	0.421467	0.417983	0.503329	0.392712	0.535713	0.4645	0.527355	0.587355	0.680085	0.77382	0.758953	0.768806	0.709913	0.880271	0.335806	0.371725	0.493077	0.483152	0.578274	0.401096	0.576109	0.485239	0.603136	0.64722	0.686917	0.794459	0.760728	0.788247	0.711541	0.892167	0.328018	0.361902	0.519467	0.596106	0.733367	0.359486	0.651338	0.636169	0.774046	0.703949	0.664766	0.801008	0.745406	0.779298	0.682683	0.87529	0.012998
423	0.331934	0.372027	0.421253	0.417794	0.503134	0.39245	0.535414	0.464115	0.527065	0.587081	0.679852	0.773632	0.758737	0.768581	0.709546	0.880105	0.335646	0.371533	0.492874	0.482926	0.578076	0.400899	0.575748	0.484987	0.602941	0.647008	0.686704	0.794208	0.76051	0.787948	0.711276	0.891981	0.327833	0.361634	0.519197	0.595799	0.733238	0.359201	0.651039	0.63589	0.773775	0.703226	0.664472	0.800713	0.745084	0.778972	0.682232	0.875042	0.012873
424	0.331627	0.371827	0.421002	0.417609	0.502919	0.392272	0.535151	0.463775	0.526814	0.586855	0.67958	0.773357	0.758516	0.768362	0.709272	0.879918	0.335497	0.371319	0.492694	0.48277	0.577895	0.400632	0.575488	0.484732	0.602717	0.646701	0.686342	0.794013	0.760312	0.787736	0.710981	0.891843	0.32771	0.361387	0.519041	0.595523	0.733062	0.358959	0.65078	0.635672	0.773516	0.702502	0.664062	0.800419	0.744798	0.778728	0.681822	0.874806	0.0127467
425	0.331491	0.371647	0.420795	0.417461	0.502719	0.392105	0.534851	0.463521	0.526526	0.586579	0.679326	0.77311	0.758251	0.768028	0.70899	0.879757	0.335353	0.371093	0.492523	0.4826	0.577758	0.400434	0.575188	0.484395	0.602512	0.646457	0.686099	0.793827	0.759995	0.78752	0.7107	0.891669	0.327528	0.361181	0.518837	0.595264	0.732902	0.358646	0.650546	0.635426	0.773307	0.702102	0.663668	0.80013	0.744479	0.778465	0.68151	0.874574	0.0126296
426	0.331297	0.371407	0.420646	0.417286	0.502549	0.391878	0.534577	0.463301	0.526255	0.586325	0.678915	0.772918	0.757968	0.767771	0.70873	0.87959	0.335187	0.370893	0.492368	0.482411	0.577551	0.400154	0.574953	0.484092	0.602303	0.646197	0.68587	0.793543	0.759737	0.787265	0.710468	0.891442	0.327331	0.360978	0.518634	0.595005	0.732718	0.358397	0.650134	0.635217	0.773038	0.701554	0.66332	0.799856	0.744142	0.778125	0.681151	0.874321	0.0124939
427	0.331113	0.371201	0.420468	0.417123	0.502324	0.391626	0.534191	0.463005	0.525953	0.586085	0.678717	0.772698	0.75767	0.767513	0.708404	0.879432	0.335033	0.370693	0.492178	0.482221	0.577389	0.399897	0.574594	0.483868	0.602094	0.645927	0.685612	0.793372	0.759515	0.787012	0.710264	0.891233	0.327188	0.360747	0.518432	0.594792	0.732557	0.358123	0.649832	0.635027	0.77284	0.701078	0.663057	0.799555	0.743744	0.777842	0.680771	0.873938	0.0123735
428	0.330953	0.370982	0.420306	0.41697	0.502158	0.391411	0.533999	0.462757	0.525687	0.58588	0.678432	0.772459	0.757377	0.767276	0.708229	0.879207	0.334885	0.370452	0.491961	0.482018	0.57721	0.399634	0.574258	0.483648	0.601909	0.645707	0.68537	0.793218	0.75925	0.786783	0.710004	0.891064	0.326974	0.360538	0.518196	0.594538	0.732385	0.357853	0.649505	0.634804	0.772661	0.70062	0.662686	0.799299	0.743487	0.777575	0.680381	0.873706	0.0122969
429	0.330803	0.370787	0.420138	0.416751	0.501982	0.391161	0.533659	0.462546	0.525443	0.58563	0.678221	0.772287	0.757065	0.767036	0.707929	0.879045	0.334663	0.370273	0.491754	0.481855	0.577041	0.399345	0.573906	0.483342	0.601662	0.645448	0.685057	0.793019	0.758957	0.786538	0.70976	0.890914	0.326703	0.36033	0.517935	0.59425	0.732236	0.357586	0.649164	0.634606	0.772466	0.700064	0.6624	0.799071	0.743139	0.777173	0.680045	0.873442	0.0121672
430	0.330624	0.370635	0.419966	0.416578	0.501803	0.390962	0.533344	0.462287	0.525164	0.585388	0.677908	0.772042	0.756781	0.766843	0.707708	0.878851	0.334544	0.370083	0.491586	0.481584	0.576875	0.399036	0.573632	0.482941	0.601376	0.645215	0.684793	0.792786	0.758648	0.786334	0.709471	0.890762	0.326524	0.360055	0.517678	0.594038	0.732069	0.357254	0.648887	0.634384	0.772289	0.699531	0.662079	0.79875	0.742824	0.776845	0.679702	0.873156	0.012061
431	0.330491	0.370434	0.419822	0.416364	0.501625	0.390731	0.533132	0.46204	0.524868	0.585136	0.677653	0.771795	0.756565	0.76663	0.707369	0.878671	0.334428	0.369896	0.491394	0.481427	0.576717	0.398726	0.573405	0.482608	0.601174	0.644969	0.684562	0.792626	0.758365	0.786133	0.709177	0.890604	0.326342	0.359825	0.51743	0.593857	0.731913	0.357051	0.648511	0.634145	0.772119	0.698849	0.661679	0.798404	0.742492	0.776582	0.679347	0.87284	0.0119557
432	0.330307	0.370258	0.419614	0.416166	0.50139	0.390544	0.532851	0.4618	0.524641	0.58486	0.677435	0.771603	0.756351	0.766411	0.707177	0.878556	0.334262	0.36971	0.491164	0.4812	0.576509	0.398497	0.573028	0.482355	0.600998	0.64475	0.684293	0.792402	0.758088	0.785877	0.708906	0.890407	0.326139	0.359603	0.517255	0.593588	0.731766	0.356819	0.648239	0.63391	0.771906	0.698165	0.661316	0.79815	0.74213	0.776279	0.679012	0.87257	0.0118656
433	0.33015	0.370053	0.419387	0.415956	0.501285	0.390336	0.532612	0.461623	0.524331	0.584594	0.677162	0.771422	0.756043	0.766088	0.706908	0.878381	0.33409	0.369581	0.490988	0.481	0.576326	0.398165	0.572638	0.482019	0.600804	0.644513	0.684049	0.79219	0.757883	0.785669	0.708545	0.890238	0.325929	0.359392	0.516939	0.593426	0.731655	0.356522	0.647926	0.633712	0.771661	0.697647	0.660992	0.797793	0.741819	0.775948	0.678625	0.872282	0.0117795
434	0.329982	0.36991	0.419202	0.415817	0.501125	0.390094	0.532336	0.46142	0.524105	0.584379	0.676878	0.771229	0.755776	0.76585	0.706664	0.878226	0.333907	0.36937	0.490788	0.480837	0.576134	0.397897	0.572341	0.481732	0.600606	0.644254	0.683781	0.792058	0.7576	0.785453	0.708252	0.890076	0.325753	0.359179	0.516718	0.593193	0.731465	0.356275	0.647748	0.633509	0.771451	0.696994	0.660684	0.797526	0.741523	0.775615	0.678343	0.872039	0.0117002
435	0.329795	0.369751	0.419034	0.415638	0.500939	0.389865	0.532079	0.461118	0.523839	0.584108	0.676637	0.770965	0.755544	0.765535	0.706447	0.878066	0.333715	0.369185	0.490558	0.480654	0.575978	0.397581	0.572036	0.481412	0.600382	0.643985	0.683458	0.791887	0.757349	0.785171	0.70799	0.889897	0.325539	0.359003	0.516523	0.592973	0.731295	0.35601	0.647426	0.633289	0.771261	0.696272	0.660331	0.79724	0.741329	0.775242	0.677876	0.871724	0.0115535
436	0.329572	0.369562	0.41887	0.415473	0.500747	0.389674	0.531734	0.460888	0.523559	0.583864	0.676447	0.770728	0.755332	0.76523	0.706172	0.877894	0.333561	0.368954	0.490329	0.480467	0.575832	0.397353	0.571698	0.481132	0.600163	0.643719	0.683241	0.791613	0.757026	0.784917	0.707738	0.889755	0.325343	0.358776	0.516308	0.592724	0.731151	0.355767	0.647133	0.633091	0.771013	0.695715	0.660053	0.796969	0.741074	0.77502	0.677569	0.871497	0.0114516
437	0.329386	0.3694	0.418641	0.415284	0.500569	0.38946	0.531382	0.460571	0.523317	0.583652	0.676222	0.770382	0.755042	0.764969	0.705726	0.877742	0.333413	0.368768	0.490143	0.480295	0.575639	0.397044	0.571344	0.480809	0.599861	0.643544	0.682965	0.791383	0.756724	0.784587	0.707395	0.889579	0.325152	0.358561	0.516094	0.59247	0.730989	0.355463	0.646831	0.632864	0.770854	0.694998	0.659747	0.796758	0.740595	0.774704	0.677242	0.87125	0.0113533
438	0.329191	0.369199	0.418466	0.415076	0.500396	0.389264	0.531111	0.460297	0.523061	0.583462	0.675922	0.770216	0.754766	0.76474	0.705456	0.877559	0.333282	0.36854	0.489959	0.480079	0.575464	0.39685	0.570935	0.48055	0.599658	0.643345	0.682711	0.791154	0.756375	0.784304	0.707097	0.889436	0.324983	0.358353	0.515925	0.592252	0.730868	0.355162	0.646517	0.632651	0.770608	0.694374	0.659457	0.796603	0.740225	0.774305	0.676887	0.870912	0.0112664
439	0.329033	0.368964	0.418265	0.414883	0.500166	0.389088	0.530798	0.460011	0.522782	0.583235	0.675702	0.769961	0.75451	0.764507	0.705202	0.877421	0.333111	0.368297	0.489787	0.479876	0.575332	0.396596	0.570578	0.480351	0.599449	0.64309	0.682431	0.790926	0.756118	0.7841	0.706737	0.889297	0.324761	0.358145	0.515724	0.592065	0.730636	0.354886	0.646251	0.63245	0.770354	0.693796	0.659148	0.79633	0.73993	0.774065	0.676392	0.870673	0.011136
440	0.328851	0.368737	0.418107	0.414673	0.500015	0.388838	0.530588	0.459714	0.522504	0.582979	0.675359	0.769712	0.7542	0.764222	0.704939	0.87723	0.332894	0.368081	0.489605	0.479733	0.575155	0.396345	0.570292	0.480027	0.5992	0.642816	0.68218	0.790697	0.755785	0.783798	0.706503	0.889133	0.32462	0.357913	0.515491	0.591811	0.730484	0.35459	0.645873	0.632282	0.770164	0.693318	0.658745	0.796161	0.739535	0.773872	0.676003	0.870337	0.0110225
441	0.328665	0.368493	0.41791	0.41451	0.499832	0.388648	0.53028	0.45946	0.522298	0.582747	0.675146	0.769485	0.753916	0.763958	0.70466	0.877065	0.332746	0.367869	0.489449	0.479556	0.574948	0.396103	0.569979	0.479784	0.59903	0.642509	0.681954	0.790561	0.755508	0.783525	0.706129	0.888987	0.324435	0.357748	0.515305	0.591578	0.730273	0.354259	0.645481	0.631963	0.769894	0.692873	0.658453	0.795879	0.739246	0.773538	0.675592	0.870066	0.010914
442	0.328475	0.368255	0.417708	0.414278	0.499656	0.38844	0.52997	0.459224	0.522094	0.582502	0.67486	0.76932	0.753664	0.763685	0.70436	0.87689	0.332552	0.367664	0.489289	0.479396	0.574789	0.395866	0.569634	0.479535	0.598844	0.642268	0.681633	0.790354	0.755285	0.783331	0.705877	0.888789	0.324229	0.357571	0.515068	0.591299	0.730113	0.354008	0.645191	0.631769	0.769701	0.692235	0.658138	0.795612	0.738967	0.773266	0.675322	0.869783	0.0107743
443	0.328274	0.368045	0.417503	0.41405	0.499501	0.388254	0.529636	0.45899	0.521875	0.582262	0.674563	0.769074	0.753414	0.763455	0.70407	0.876735	0.332385	0.367436	0.489102	0.479234	0.574647	0.395628	0.56934	0.479223	0.598655	0.641981	0.681425	0.790169	0.754994	0.783142	0.705618	0.888607	0.324093	0.357357	0.514864	0.591061	0.72998	0.353701	0.644861	0.631563	0.76949	0.691884	0.657767	0.795231	0.73862	0.773009	0.675071	0.869498	0.0106776
444	0.32807	0.367842	0.41734	0.413856	0.499338	0.388039	0.529314	0.45875	0.521637	0.582061	0.674274	0.768897	0.753142	0.763175	0.703826	0.876504	0.33224	0.367248	0.488968	0.479033	0.574491	0.395326	0.569027	0.47891	0.598463	0.641725	0.681183	0.789948	0.754607	0.782945	0.705349	0.888482	0.323901	0.357114	0.514679	0.59089	0.729793	0.353378	0.644473	0.631395	0.769274	0.691273	0.657514	0.794994	0.738253	0.772743	0.674618	0.869202	0.0105726
445	0.327922	0.367668	0.417186	0.413657	0.499159	0.387781	0.528954	0.458537	0.521378	0.581836	0.674011	0.768667	0.752897	0.762949	0.703545	0.876312	0.332023	0.367031	0.488788	0.478861	0.574305	0.395037	0.568705	0.478702	0.598257	0.641465	0.680893	0.789685	0.75425	0.78264	0.705138	0.888309	0.323688	0.356873	0.514455	0.590671	0.729615	0.353121	0.644251	0.631241	0.769071	0.690657	0.657208	0.794656	0.737927	0.772417	0.674338	0.868942	0.0104951
446	0.327728	0.367447	0.416972	0.413492	0.498973	0.387536	0.528582	0.458302	0.521066	0.581632	0.673734	0.76845	0.752683	0.762752	0.703245	0.876116	0.331881	0.36682	0.488641	0.478688	0.57415	0.394705	0.568363	0.478412	0.598091	0.641221	0.680637	0.789478	0.753991	0.782406	0.704872	0.888183	0.323529	0.356614	0.514255	0.590442	0.729465	0.352823	0.643975	0.631064	0.768874	0.6899	0.656868	0.794374	0.737671	0.772116	0.673924	0.868692	0.0104337
447	0.327606	0.367279	0.416711	0.41331	0.49884	0.387307	0.528167	0.458045	0.520862	0.581435	0.673489	0.768251	0.752434	0.762521	0.702987	0.875867	0.331682	0.366546	0.488462	0.478502	0.573975	0.394461	0.568015	0.478143	0.597863	0.640984	0.680346	0.789215	0.753717	0.782181	0.704593	0.888032	0.323362	0.356397	0.514017	0.590226	0.729311	0.352512	0.643624	0.630862	0.76867	0.689366	0.656631	0.79405	0.737306	0.771802	0.673527	0.868413	0.0103233
448	0.327441	0.367108	0.416502	0.41314	0.4986	0.3871	0.527915	0.457815	0.520635	0.581194	0.673187	0.767928	0.752133	0.762325	0.702774	0.875687	0.331545	0.366373	0.4883	0.4783	0.573784	0.394212	0.56768	0.477806	0.597658	0.640742	0.679896	0.789011	0.75344	0.781873	0.704361	0.887825	0.323215	0.356177	0.513826	0.590015	0.729167	0.352204	0.643343	0.63068	0.768435	0.688832	0.656373	0.793737	0.736986	0.771487	0.673251	0.868133	0.0102374
449	0.327234	0.36693	0.41629	0.412915	0.498427	0.386873	0.527641	0.457569	0.520411	0.580949	0.672958	0.767697	0.751868	0.762007	0.702575	0.875548	0.331389	0.366133	0.488145	0.47815	0.573593	0.393929	0.567298	0.477512	0.597419	0.640489	0.679594	0.788818	0.753214	0.781635	0.704098	0.887629	0.323077	0.35605	0.513681	0.589759	0.729044	0.351896	0.643011	0.630479	0.768184	0.68833	0.655987	0.793437	0.736597	0.771219	0.672924	0.867922	0.0101512
450	0.327031	0.366678	0.416058	0.4127	0.498263	0.386647	0.527319	0.457368	0.520157	0.580737	0.67266	0.767544	0.751589	0.761709	0.702281	0.875369	0.331196	0.365953	0.487888	0.477956	0.573398	0.393654	0.567011	0.477269	0.597233	0.640291	0.679354	0.788552	0.75289	0.781348	0.703798	0.887451	0.322895	0.355838	0.513484	0.589602	0.72887	0.351589	0.642797	0.630309	0.767968	0.68771	0.65578	0.793136	0.736323	0.770831	0.672602	0.867625	0.0100098
451	0.326795	0.366466	0.415852	0.412535	0.498159	0.386434	0.527093	0.457098	0.519901	0.580523	0.672388	0.767332	0.751397	0.761432	0.702043	0.875232	0.330992	0.365769	0.487684	0.477756	0.573187	0.393395	0.566658	0.476996	0.596998	0.640005	0.678999	0.788338	0.752615	0.781051	0.703587	0.887276	0.322762	0.355613	0.513262	0.589385	0.728715	0.351381	0.642511	0.630095	0.767782	0.68711	0.65536	0.792878	0.73599	0.770512	0.672236	0.867382	0.00987481
452	0.326598	0.366332	0.415635	0.412354	0.497945	0.38616	0.526735	0.456877	0.519638	0.580206	0.672153	0.767171	0.751163	0.761164	0.701836	0.875053	0.330835	0.365555	0.487512	0.47757	0.573026	0.393131	0.566396	0.476775	0.596757	0.6397	0.678742	0.788163	0.75236	0.780848	0.703267	0.887116	0.322601	0.355416	0.513037	0.589148	0.728551	0.351073	0.642074	0.629858	0.767543	0.686596	0.6551	0.792593	0.735556	0.770111	0.6719	0.867063	0.00977454
453	0.326454	0.366106	0.415474	0.4122	0.49779	0.385921	0.526434	0.456625	0.519394	0.579932	0.671884	0.766979	0.750871	0.760934	0.701602	0.8749	0.330664	0.365363	0.487254	0.477335	0.572849	0.392945	0.566168	0.476554	0.596546	0.6395	0.678497	0.788012	0.75202	0.780572	0.70291	0.886961	0.322401	0.355208	0.512842	0.588874	0.728374	0.350767	0.641691	0.629677	0.767294	0.685968	0.654837	0.792371	0.735339	0.769922	0.671463	0.866872	0.00962312
454	0.326291	0.365925	0.415251	0.41202	0.497624	0.385721	0.526141	0.456399	0.519177	0.579689	0.671653	0.766766	0.75063	0.760718	0.701326	0.874752	0.330528	0.365198	0.487095	0.47718	0.572705	0.392722	0.565885	0.47624	0.596335	0.639233	0.678215	0.787852	0.751728	0.780364	0.702621	0.886787	0.322177	0.354971	0.512628	0.588653	0.728186	0.35054	0.641325	0.629442	0.767068	0.685386	0.654528	0.791979	0.734973	0.769656	0.671156	0.866622	0.00954527
455	0.32609	0.365693	0.415072	0.411826	0.49747	0.385527	0.525806	0.456171	0.518934	0.579425	0.671379	0.766581	0.750366	0.760472	0.701068	0.874534	0.330393	0.364954	0.486918	0.476911	0.572524	0.3925	0.565648	0.476013	0.596178	0.638983	0.677926	0.787618	0.751439	0.780113	0.70242	0.886593	0.322025	0.35477	0.512394	0.588436	0.72805	0.350252	0.641006	0.629264	0.766842	0.684784	0.654187	0.79171	0.734604	0.769302	0.670732	0.866369	0.00940037
456	0.325963	0.365483	0.414866	0.411682	0.497306	0.385316	0.525421	0.455876	0.518714	0.579207	0.671043	0.766306	0.750125	0.76021	0.700833	0.87433	0.33024	0.364761	0.486759	0.476733	0.572338	0.392246	0.565316	0.475736	0.595984	0.638755	0.677657	0.787478	0.751154	0.779854	0.702143	0.886398	0.321817	0.354568	0.512182	0.588242	0.727879	0.349874	0.640778	0.629073	0.766568	0.684126	0.653983	0.791428	0.734295	0.769032	0.67037	0.866092	0.00932028
457	0.325808	0.365326	0.414679	0.411458	0.497115	0.385149	0.525145	0.455668	0.518468	0.578916	0.670787	0.766164	0.749905	0.760013	0.700513	0.874169	0.330061	0.364568	0.486612	0.476531	0.572133	0.391949	0.565029	0.475477	0.59578	0.638555	0.677368	0.78723	0.75084	0.779656	0.701892	0.886184	0.321667	0.3543	0.511959	0.588074	0.727737	0.349584	0.640562	0.628852	0.766404	0.683287	0.653687	0.791111	0.73405	0.768714	0.670005	0.865816	0.00918058
458	0.325642	0.365117	0.414494	0.411275	0.496966	0.384903	0.524794	0.455406	0.518211	0.578703	0.670448	0.76591	0.74958	0.759746	0.700255	0.873974	0.329882	0.364355	0.486388	0.476335	0.571954	0.391674	0.564727	0.475169	0.595511	0.638369	0.677123	0.787035	0.750597	0.779376	0.701615	0.88595	0.321515	0.354144	0.511724	0.587828	0.727537	0.349306	0.640262	0.628608	0.766177	0.682486	0.653308	0.79064	0.733789	0.768385	0.669672	0.865522	0.00907425
459	0.325459	0.364934	0.414353	0.411084	0.496745	0.38469	0.524556	0.455153	0.517921	0.578475	0.670229	0.765636	0.749321	0.759515	0.700027	0.873787	0.329682	0.364204	0.486178	0.476175	0.571796	0.391457	0.564477	0.474876	0.595258	0.638114	0.676803	0.786782	0.750398	0.779133	0.701364	0.885822	0.321315	0.353957	0.511511	0.587642	0.727374	0.349012	0.639982	0.628316	0.76601	0.681694	0.652983	0.790401	0.733509	0.768036	0.66934	0.865328	0.00896024
460	0.325311	0.364736	0.414067	0.410894	0.496575	0.384464	0.524209	0.454931	0.517619	0.578177	0.670026	0.765449	0.749083	0.75933	0.699705	0.873596	0.329553	0.364035	0.485988	0.475956	0.571591	0.391198	0.564141	0.474581	0.59507	0.637868	0.676569	0.786638	0.750092	0.778894	0.701014	0.885672	0.321155	0.353738	0.51133	0.587372	0.727216	0.348726	0.639594	0.628126	0.765835	0.681114	0.652612	0.790097	0.733193	0.767684	0.669095	0.86512	0.00887926
461	0.325139	0.364526	0.413908	0.410744	0.496443	0.384262	0.523957	0.454675	0.517348	0.577882	0.669816	0.765188	0.748831	0.759099	0.699427	0.873417	0.329397	0.363879	0.485804	0.475769	0.571411	0.390987	0.563852	0.474298	0.594878	0.637615	0.676274	0.786444	0.749842	0.778707	0.700763	0.885505	0.320921	0.353492	0.511167	0.587146	0.727044	0.348353	0.639253	0.627859	0.765601	0.680557	0.652264	0.789822	0.732838	0.767398	0.668679	0.864892	0.00878176
462	0.324967	0.364352	0.413733	0.410556	0.49629	0.384088	0.523775	0.454472	0.517137	0.577669	0.669606	0.765008	0.74862	0.758816	0.699205	0.873261	0.32922	0.363641	0.485583	0.4756	0.571252	0.390749	0.563478	0.474018	0.594673	0.637405	0.675995	0.78625	0.749589	0.778445	0.700509	0.885349	0.320752	0.353293	0.510953	0.586848	0.726873	0.348115	0.638958	0.627692	0.765396	0.679859	0.651978	0.789495	0.73249	0.767065	0.668424	0.864616	0.00870995
463	0.324782	0.364148	0.413538	0.410367	0.496103	0.383891	0.523507	0.454212	0.516864	0.577357	0.669345	0.764819	0.748414	0.75861	0.698876	0.873103	0.329065	0.363442	0.485357	0.47539	0.571072	0.390559	0.563145	0.473788	0.59447	0.637168	0.675732	0.786048	0.749286	0.778217	0.700184	0.885158	0.320618	0.353074	0.510745	0.586615	0.726707	0.347775	0.638552	0.627517	0.765178	0.67919	0.651602	0.789147	0.73219	0.766787	0.668012	0.864334	0.00860445
464	0.324586	0.363995	0.413336	0.410177	0.49595	0.383715	0.523129	0.454033	0.516645	0.577128	0.669149	0.7646	0.748183	0.758368	0.698657	0.872905	0.328905	0.363247	0.485168	0.475239	0.570916	0.390338	0.562884	0.473557	0.59426	0.636852	0.675421	0.78587	0.749041	0.778021	0.699987	0.884992	0.320391	0.35292	0.510544	0.58641	0.726563	0.347521	0.638251	0.627266	0.76504	0.678743	0.651326	0.788846	0.731877	0.766419	0.667732	0.864093	0.0085233
465	0.324408	0.363804	0.413182	0.409955	0.495827	0.383499	0.522828	0.45386	0.516434	0.576851	0.668904	0.764417	0.747938	0.758083	0.698375	0.872681	0.328735	0.363081	0.485001	0.475078	0.570745	0.39012	0.562656	0.473251	0.594122	0.636575	0.675177	0.785622	0.748789	0.777791	0.699684	0.884853	0.320238	0.352681	0.510332	0.586145	0.726408	0.347144	0.637879	0.627039	0.764832	0.677816	0.651027	0.788482	0.731618	0.766124	0.667263	0.863762	0.00847057
466	0.324259	0.363638	0.413033	0.409779	0.495637	0.383309	0.522558	0.453642	0.51619	0.576606	0.668637	0.764192	0.747649	0.757859	0.698057	0.872521	0.328591	0.362911	0.484773	0.474892	0.570597	0.389941	0.562355	0.473046	0.593951	0.636346	0.674923	0.785381	0.748548	0.777557	0.699436	0.884699	0.320088	0.352506	0.510156	0.585918	0.726194	0.346881	0.63747	0.626821	0.76462	0.677173	0.650653	0.788219	0.731356	0.765851	0.666924	0.863506	0.00836471
467	0.324069	0.363427	0.41285	0.409619	0.495428	0.383129	0.522283	0.45338	0.51593	0.576316	0.668434	0.763976	0.747444	0.757637	0.697779	0.872314	0.328391	0.362756	0.484563	0.474766	0.570435	0.389619	0.562142	0.472776	0.59375	0.636092	0.674666	0.785165	0.748286	0.777301	0.69916	0.884566	0.31988	0.352278	0.509928	0.585703	0.725981	0.346643	0.63722	0.626613	0.764343	0.676556	0.650301	0.787942	0.730975	0.765558	0.666561	0.863202	0.00825535
468	0.323858	0.36324	0.412727	0.409432	0.495275	0.382916	0.522002	0.453119	0.515656	0.576067	0.668134	0.763735	0.747121	0.757398	0.697514	0.872185	0.328233	0.362565	0.484353	0.474601	0.570262	0.389309	0.561822	0.472445	0.593484	0.635852	0.674435	0.784935	0.748024	0.77701	0.698853	0.884352	0.319697	0.352065	0.509748	0.585509	0.7258	0.346334	0.636887	0.626418	0.764107	0.675879	0.649961	0.7876	0.730682	0.765249	0.666217	0.862928	0.00815841
469	0.323702	0.363077	0.412541	0.409248	0.495151	0.382671	0.521721	0.452911	0.515337	0.575838	0.667865	0.763493	0.74687	0.757165	0.697262	0.872062	0.328013	0.362336	0.484141	0.474385	0.570108	0.389062	0.561549	0.472226	0.59332	0.635619	0.674174	0.784689	0.74782	0.776768	0.698584	0.88416	0.319494	0.351808	0.509504	0.585274	0.725666	0.346049	0.636611	0.62623	0.76392	0.675246	0.649696	0.787334	0.730322	0.76505	0.66586	0.862687	0.00805393
470	0.323538	0.362811	0.41235	0.409055	0.49496	0.382482	0.521391	0.452569	0.515154	0.57559	0.66754	0.763311	0.746536	0.756916	0.697075	0.871922	0.327863	0.362116	0.483946	0.47423	0.569956	0.388757	0.561269	0.47193	0.593053	0.63537	0.673964	0.784482	0.747544	0.776477	0.698362	0.883938	0.319315	0.351588	0.509292	0.585066	0.725495	0.345806	0.636348	0.625992	0.763699	0.674675	0.649445	0.786968	0.729957	0.764738	0.665417	0.862443	0.008007
471	0.323388	0.362624	0.412184	0.408894	0.49477	0.382269	0.52112	0.452326	0.514899	0.575383	0.667268	0.763124	0.746224	0.756691	0.696835	0.871772	0.327665	0.361933	0.483739	0.474048	0.56979	0.388504	0.560887	0.471602	0.59283	0.635109	0.673752	0.784235	0.74726	0.776301	0.698061	0.883769	0.319096	0.351352	0.509101	0.584806	0.725392	0.345569	0.63588	0.625729	0.763442	0.674106	0.649178	0.786697	0.729596	0.76432	0.665044	0.862195	0.00787896
472	0.323213	0.362481	0.412029	0.408732	0.494635	0.382044	0.520815	0.45215	0.514661	0.575096	0.667101	0.76292	0.745967	0.756417	0.696561	0.871582	0.327509	0.361732	0.483494	0.473857	0.569662	0.388249	0.560656	0.471279	0.592625	0.634909	0.673517	0.784003	0.746947	0.776063	0.697775	0.883605	0.318921	0.351205	0.508944	0.584586	0.72527	0.345286	0.635539	0.625469	0.763209	0.673659	0.648882	0.786358	0.729351	0.763971	0.664629	0.861907	0.00778357
473	0.323054	0.362303	0.411842	0.408589	0.494436	0.381846	0.520595	0.451933	0.514354	0.574907	0.666867	0.762746	0.74574	0.756217	0.696256	0.871416	0.32736	0.361582	0.483324	0.473627	0.569535	0.387958	0.560347	0.470964	0.592363	0.634702	0.673258	0.783797	0.746748	0.775854	0.697507	0.883439	0.318747	0.351003	0.508755	0.584305	0.725102	0.344978	0.635322	0.625308	0.76304	0.673023	0.648623	0.786047	0.729003	0.763628	0.664325	0.861654	0.00772801
474	0.322829	0.362134	0.411673	0.408386	0.494222	0.381622	0.520335	0.451674	0.514073	0.574674	0.666601	0.762587	0.745402	0.756065	0.695999	0.87125	0.32723	0.361423	0.483159	0.473478	0.569386	0.38774	0.560083	0.470726	0.59214	0.634517	0.672948	0.783652	0.746466	0.775653	0.697211	0.883259	0.318625	0.350735	0.508521	0.584101	0.724944	0.344733	0.634916	0.625101	0.762868	0.672307	0.648368	0.785753	0.728634	0.763333	0.663898	0.861439	0.00765481
475	0.322688	0.361984	0.41153	0.40821	0.494075	0.381397	0.520064	0.451477	0.513812	0.574483	0.666382	0.762376	0.745156	0.75585	0.695731	0.871067	0.327037	0.361255	0.482991	0.473296	0.569208	0.387528	0.559814	0.470497	0.591904	0.634327	0.672711	0.783429	0.746194	0.775462	0.696892	0.883045	0.318468	0.350532	0.508334	0.583794	0.724699	0.344463	0.634654	0.624906	0.76262	0.671658	0.648108	0.785465	0.728292	0.762911	0.663568	0.861165	0.0075691
476	0.322484	0.361817	0.411345	0.40805	0.493912	0.3812	0.519831	0.451227	0.513629	0.574225	0.666116	0.762131	0.744926	0.755513	0.695366	0.87089	0.326907	0.361059	0.482859	0.473091	0.569041	0.387198	0.559492	0.470199	0.591676	0.634122	0.672461	0.783234	0.745924	0.775248	0.696616	0.882828	0.318289	0.350337	0.508162	0.583525	0.724578	0.344157	0.634322	0.624719	0.762462	0.670925	0.647816	0.785145	0.728003	0.762624	0.663135	0.860879	0.00749413
477	0.322349	0.361654	0.411162	0.407889	0.493746	0.380992	0.519543	0.450982	0.513458	0.574025	0.665902	0.761936	0.744637	0.755311	0.695124	0.870705	0.32678	0.36086	0.482695	0.472939	0.568861	0.386916	0.559242	0.469905	0.591537	0.633909	0.672185	0.782998	0.74561	0.774994	0.696286	0.882668	0.318124	0.350131	0.507966	0.583274	0.724387	0.343916	0.634045	0.624476	0.762267	0.670286	0.647556	0.784901	0.727646	0.762377	0.662807	0.860613	0.00742697
478	0.3222	0.361495	0.411005	0.407714	0.493516	0.380816	0.519237	0.450687	0.513226	0.573835	0.665661	0.761736	0.744369	0.754994	0.69491	0.870549	0.326628	0.360652	0.482513	0.472702	0.568709	0.386654	0.558935	0.469699	0.591333	0.633685	0.671916	0.782838	0.745335	0.77479	0.69601	0.882516	0.317957	0.349925	0.507755	0.582968	0.724235	0.343633	0.633901	0.624344	0.762034	0.669611	0.647305	0.784669	0.727324	0.762068	0.66254	0.860319	0.00736906
479	0.322039	0.361292	0.410855	0.407547	0.493384	0.380605	0.518988	0.450428	0.51302	0.573619	0.665465	0.761493	0.744065	0.754743	0.694594	0.870341	0.326432	0.360449	0.482314	0.472475	0.56854	0.386417	0.558674	0.469388	0.591149	0.633391	0.671665	0.782651	0.745066	0.774573	0.695725	0.88233	0.317801	0.349691	0.507558	0.582748	0.724085	0.3434	0.633602	0.624119	0.761862	0.669085	0.647056	0.784322	0.726981	0.761837	0.662304	0.859994	0.00725311
480	0.321898	0.361049	0.410648	0.407402	0.493192	0.380375	0.518642	0.450144	0.512817	0.573331	0.665251	0.761262	0.743795	0.754519	0.694299	0.870178	0.326282	0.360274	0.482083	0.472282	0.568398	0.386149	0.55842	0.469039	0.590934	0.633125	0.671395	0.782453	0.744803	0.77435	0.69547	0.882142	0.317599	0.349369	0.50733	0.58253	0.723949	0.343146	0.63328	0.623927	0.761629	0.668458	0.646764	0.784013	0.72667	0.76156	0.662059	0.859695	0.00720237
481	0.321689	0.360867	0.410469	0.407214	0.493004	0.380155	0.518263	0.449942	0.512619	0.573118	0.665075	0.761097	0.743594	0.754267	0.694021	0.870033	0.3261	0.36015	0.481883	0.472069	0.568235	0.385943	0.558086	0.468822	0.590686	0.632907	0.671103	0.782271	0.74454	0.774089	0.695244	0.881939	0.317398	0.349142	0.507129	0.582247	0.72378	0.342841	0.632936	0.623753	0.761373	0.667886	0.646366	0.783615	0.726362	0.761234	0.661727	0.859389	0.00710922
482	0.321526	0.360723	0.410248	0.40707	0.492838	0.379959	0.51804	0.449668	0.512442	0.572871	0.664782	0.760915	0.743328	0.754042	0.693758	0.869844	0.32591	0.36002	0.481728	0.471929	0.568071	0.385748	0.557759	0.46856	0.590505	0.632656	0.670874	0.78195	0.744309	0.773828	0.69506	0.881762	0.317205	0.348931	0.506864	0.582052	0.723601	0.342578	0.632611	0.623529	0.761159	0.66725	0.646039	0.78337	0.725971	0.760936	0.66133	0.859123	0.00703962
483	0.321391	0.360585	0.410065	0.406887	0.492659	0.379709	0.517797	0.449423	0.512178	0.572626	0.66456	0.760716	0.743115	0.753778	0.693566	0.869614	0.325781	0.359838	0.481509	0.471747	0.567919	0.385538	0.557501	0.468187	0.590291	0.632421	0.670612	0.781706	0.744008	0.773573	0.694679	0.881556	0.317063	0.348685	0.506665	0.581892	0.723452	0.342227	0.632329	0.623328	0.760904	0.666579	0.645838	0.783041	0.725604	0.760587	0.661004	0.858902	0.00693522
484	0.321207	0.360446	0.409896	0.406698	0.492496	0.379502	0.517474	0.449219	0.511918	0.57239	0.66431	0.760491	0.742897	0.753576	0.693322	0.869463	0.325576	0.35965	0.481353	0.471554	0.567734	0.38518	0.557223	0.46797	0.590089	0.63223	0.670385	0.78152	0.743723	0.773237	0.694394	0.881374	0.316884	0.348445	0.50651	0.581672	0.723265	0.341973	0.632051	0.623105	0.76064	0.666064	0.645585	0.782737	0.725358	0.760286	0.660761	0.858609	0.00677849
485	0.321054	0.3603	0.409747	0.40652	0.49234	0.379302	0.517234	0.449021	0.511679	0.572172	0.66407	0.760319	0.742573	0.753239	0.693085	0.869284	0.325436	0.359451	0.481117	0.471416	0.567542	0.384939	0.556895	0.467711	0.58988	0.632003	0.670121	0.781314	0.743513	0.772958	0.694156	0.881166	0.316678	0.348194	0.506339	0.58142	0.723079	0.341814	0.631647	0.622956	0.760411	0.665202	0.645271	0.782432	0.725032	0.760036	0.66045	0.858337	0.00669908
486	0.320876	0.360149	0.409576	0.406331	0.492146	0.379144	0.516893	0.44885	0.511431	0.571923	0.663894	0.760117	0.742365	0.75298	0.692742	0.869103	0.325304	0.3593	0.480893	0.471202	0.567353	0.384726	0.55658	0.467481	0.589664	0.631848	0.669851	0.781078	0.743271	0.77268	0.693848	0.881022	0.316462	0.347974	0.506176	0.581211	0.722935	0.341524	0.631287	0.622795	0.76009	0.664366	0.645065	0.78213	0.724646	0.759628	0.660125	0.858031	0.00663391
487	0.320715	0.359904	0.409365	0.406164	0.491982	0.378981	0.516607	0.448584	0.511198	0.571685	0.663664	0.759894	0.742013	0.752766	0.692434	0.868938	0.325173	0.359184	0.480682	0.471036	0.567165	0.384538	0.556225	0.467259	0.589447	0.631613	0.669553	0.780879	0.742907	0.772502	0.693572	0.880894	0.316279	0.347817	0.505958	0.581001	0.722782	0.341288	0.630969	0.622596	0.759872	0.663635	0.64479	0.78184	0.72429	0.759343	0.659782	0.857749	0.00650488
488	0.320561	0.359747	0.409221	0.405977	0.491833	0.378735	0.516433	0.448357	0.510982	0.571462	0.663408	0.7597	0.741782	0.752582	0.692253	0.868767	0.325036	0.358974	0.480483	0.470885	0.566984	0.384328	0.555859	0.466998	0.589232	0.631404	0.66928	0.780676	0.742657	0.772273	0.693261	0.880721	0.316136	0.34767	0.505764	0.580756	0.722685	0.341085	0.630547	0.622405	0.759666	0.663031	0.644454	0.781602	0.723928	0.759064	0.659485	0.857411	0.00643914
489	0.320416	0.359624	0.409052	0.405776	0.491663	0.37856	0.51619	0.448139	0.51074	0.571236	0.663053	0.759532	0.741536	0.752336	0.69202	0.868621	0.324906	0.35878	0.480293	0.470715	0.566813	0.384112	0.5556	0.466716	0.588999	0.631241	0.669061	0.780466	0.742476	0.772042	0.692935	0.880475	0.315961	0.347436	0.505528	0.580492	0.722507	0.340766	0.63023	0.622196	0.759395	0.662435	0.644138	0.781162	0.723599	0.758665	0.659228	0.857117	0.00636706
490	0.320303	0.359464	0.40892	0.405625	0.491522	0.378363	0.515868	0.44789	0.51053	0.571043	0.662797	0.759322	0.741283	0.752139	0.691758	0.868449	0.324742	0.358569	0.480105	0.470517	0.566686	0.383886	0.555287	0.466497	0.58882	0.631001	0.668858	0.780273	0.74222	0.771826	0.692672	0.880298	0.315818	0.347139	0.505335	0.580209	0.722389	0.340511	0.630034	0.62198	0.759158	0.661751	0.643919	0.780919	0.72326	0.758306	0.658948	0.856798	0.00630641
491	0.320129	0.359252	0.408755	0.405431	0.491383	0.37819	0.515512	0.447686	0.510326	0.570797	0.662587	0.759123	0.741041	0.751906	0.691402	0.868241	0.324534	0.358364	0.479962	0.470335	0.566519	0.38367	0.554942	0.466206	0.588639	0.630811	0.668627	0.780079	0.74184	0.771639	0.692387	0.88006	0.315625	0.346943	0.505161	0.579972	0.722265	0.340211	0.629544	0.621756	0.758869	0.66108	0.643617	0.780602	0.722937	0.758006	0.658658	0.85655	0.00621609
492	0.319986	0.359039	0.408532	0.405297	0.491199	0.37794	0.515154	0.447466	0.510085	0.570488	0.662382	0.758939	0.7408	0.75168	0.691139	0.868041	0.324406	0.358214	0.479827	0.470195	0.566331	0.383479	0.554578	0.465924	0.588475	0.630596	0.668348	0.779933	0.741625	0.771454	0.692176	0.879906	0.315477	0.346725	0.504977	0.579781	0.722075	0.340026	0.629256	0.621584	0.758587	0.660431	0.643427	0.78034	0.722596	0.757672	0.658431	0.856273	0.00616079
493	0.319783	0.358855	0.408331	0.405107	0.490999	0.377693	0.514975	0.447272	0.509808	0.570213	0.662181	0.758693	0.740473	0.751482	0.690871	0.867844	0.324264	0.35801	0.479708	0.470044	0.566121	0.383175	0.554253	0.465608	0.588215	0.630349	0.668099	0.779744	0.741354	0.771167	0.691912	0.879738	0.315313	0.346572	0.504764	0.579585	0.721931	0.339774	0.629002	0.6214	0.758265	0.659828	0.643128	0.780054	0.722298	0.757408	0.658015	0.855963	0.006088
494	0.31959	0.35868	0.408107	0.404945	0.49084	0.377501	0.514737	0.447088	0.509596	0.569953	0.6619	0.758507	0.740199	0.751252	0.690654	0.867695	0.324099	0.357866	0.479524	0.469815	0.565925	0.382861	0.553987	0.465312	0.588009	0.630134	0.667829	0.779524	0.741112	0.770892	0.691651	0.87956	0.31514	0.34632	0.504565	0.579333	0.721694	0.339532	0.628706	0.621245	0.75807	0.65915	0.642783	0.779679	0.721996	0.757103	0.657799	0.85567	0.00600437
495	0.319372	0.358538	0.407975	0.404746	0.490643	0.377283	0.514486	0.446794	0.509338	0.569722	0.661642	0.75823	0.739907	0.751039	0.690319	0.86753	0.323951	0.357719	0.479338	0.46966	0.565769	0.382533	0.553645	0.465074	0.58777	0.629871	0.667592	0.779266	0.740886	0.770703	0.691435	0.879436	0.314986	0.34605	0.504354	0.579124	0.721534	0.339297	0.62843	0.621043	0.757896	0.658509	0.642456	0.77936	0.72173	0.756787	0.657456	0.855396	0.00592402
496	0.319211	0.358289	0.40778	0.404581	0.490473	0.377071	0.514131	0.446536	0.509077	0.569485	0.661401	0.758024	0.739711	0.750834	0.690072	0.86735	0.323808	0.357498	0.479127	0.469519	0.565624	0.382307	0.553397	0.464856	0.587528	0.629676	0.667369	0.779078	0.740648	0.770499	0.69112	0.879247	0.314823	0.34583	0.50417	0.578919	0.72136	0.339035	0.628142	0.62081	0.757706	0.657908	0.642159	0.779088	0.721425	0.756442	0.657168	0.855056	0.00581349
497	0.319077	0.358122	0.407594	0.40443	0.49027	0.37689	0.513794	0.446257	0.50886	0.569237	0.661129	0.757801	0.73948	0.750642	0.689751	0.867216	0.323676	0.35729	0.479014	0.469395	0.565488	0.382023	0.55316	0.464655	0.587322	0.629438	0.667178	0.778877	0.740419	0.770239	0.69088	0.879095	0.314643	0.345652	0.503973	0.578694	0.721179	0.338797	0.627887	0.620672	0.757454	0.657192	0.641892	0.778825	0.7211	0.756172	0.656898	0.854804	0.0057584
498	0.318898	0.35795	0.407449	0.40427	0.49009	0.376707	0.51345	0.445976	0.508638	0.569008	0.660857	0.757565	0.739176	0.750473	0.68949	0.867032	0.323508	0.357087	0.478874	0.469217	0.565267	0.381776	0.552937	0.46437	0.587146	0.629103	0.666923	0.778677	0.740135	0.770023	0.690626	0.878899	0.314486	0.345411	0.503755	0.578437	0.721027	0.338497	0.627653	0.620446	0.757196	0.656628	0.641478	0.778529	0.72079	0.755877	0.65658	0.854463	0.0056836
499	0.31873	0.357756	0.407253	0.404077	0.48989	0.376476	0.513238	0.445724	0.5084	0.568799	0.660643	0.757351	0.738896	0.750213	0.689091	0.86686	0.323347	0.356888	0.478759	0.469093	0.565112	0.381549	0.552689	0.464158	0.586955	0.62884	0.666628	0.778473	0.739942	0.769785	0.690391	0.878731	0.314329	0.345201	0.503579	0.578242	0.720821	0.338273	0.627354	0.620198	0.756899	0.655978	0.641211	0.778272	0.720483	0.755686	0.656288	0.854173	0.00561643
500	0.318555	0.357554	0.407094	0.403906	0.489697	0.376157	0.512914	0.445497	0.508191	0.568572	0.660467	0.757184	0.738619	0.749999	0.688816	0.866675	0.323177	0.356683	0.478573	0.468929	0.564986	0.381377	0.552328	0.463881	0.586756	0.62857	0.666456	0.778222	0.739651	0.769571	0.690106	0.878573	0.314133	0.344967	0.503365	0.577997	0.720679	0.337921	0.627056	0.61997	0.756603	0.655357	0.640951	0.77792	0.720186	0.755407	0.655953	0.853901	0.00554801
501	0.318413	0.357393	0.406889	0.403735	0.489466	0.375951	0.512633	0.445241	0.507943	0.568257	0.660233	0.75699	0.738391	0.749718	0.688546	0.866457	0.322975	0.356475	0.478392	0.46879	0.564817	0.381161	0.552019	0.463696	0.586572	0.628298	0.666135	0.778029	0.739446	0.769332	0.689852	0.878395	0.313961	0.344704	0.503153	0.57783	0.720537	0.337622	0.626734	0.619799	0.756376	0.654618	0.640642	0.777616	0.719793	0.755143	0.655609	0.853642	0.00547547
502	0.318239	0.35724	0.406738	0.403568	0.489287	0.375712	0.512371	0.44494	0.507733	0.567975	0.659939	0.756789	0.738183	0.749523	0.688245	0.866278	0.322788	0.356278	0.478227	0.468625	0.564664	0.380962	0.551704	0.463475	0.586291	0.628085	0.665931	0.77784	0.739223	0.769084	0.689548	0.878205	0.313767	0.344488	0.502979	0.57757	0.720397	0.337415	0.626389	0.619643	0.75621	0.653899	0.640442	0.777335	0.719428	0.75486	0.655282	0.853477	0.00538954
503	0.318082	0.357041	0.406567	0.4034	0.489128	0.37552	0.512095	0.444709	0.507496	0.567701	0.659737	0.756534	0.737936	0.74934	0.68794	0.866122	0.322685	0.356073	0.478018	0.468434	0.564464	0.3807	0.55143	0.463245	0.586117	0.627853	0.665728	0.777636	0.738951	0.768782	0.689278	0.878056	0.313612	0.344329	0.502761	0.577304	0.720239	0.337201	0.626029	0.619427	0.755949	0.653263	0.6401	0.777029	0.719066	0.754513	0.655008	0.853255	0.00533263
504	0.317912	0.356792	0.406338	0.403219	0.488931	0.375286	0.511879	0.444464	0.507273	0.56751	0.659521	0.756362	0.737637	0.749083	0.687644	0.865949	0.322563	0.355845	0.47782	0.468275	0.564281	0.380482	0.551227	0.462958	0.585914	0.627587	0.665491	0.777365	0.738643	0.768558	0.689038	0.87791	0.313464	0.344115	0.502574	0.577034	0.720067	0.336915	0.625723	0.619215	0.755708	0.652438	0.639778	0.776758	0.718709	0.754232	0.654724	0.852936	0.00525785
505	0.31772	0.356631	0.406133	0.40297	0.488804	0.375094	0.511568	0.444159	0.507028	0.567261	0.659293	0.756191	0.737422	0.748855	0.68737	0.865749	0.322418	0.355656	0.477654	0.468068	0.564122	0.380267	0.550959	0.462689	0.58573	0.62737	0.66519	0.777176	0.738353	0.768301	0.688822	0.87772	0.313344	0.343929	0.502373	0.576816	0.719925	0.336656	0.625471	0.61908	0.75549	0.651727	0.639431	0.776476	0.718373	0.753954	0.654425	0.852586	0.00521283
506	0.31754	0.356368	0.405956	0.402765	0.48862	0.374876	0.511328	0.443931	0.506868	0.567061	0.659014	0.755998	0.737133	0.748681	0.687178	0.865552	0.32226	0.355409	0.477481	0.467888	0.563975	0.38008	0.550711	0.462434	0.585527	0.627191	0.66489	0.776979	0.738097	0.768096	0.688582	0.877558	0.313165	0.34369	0.502159	0.576555	0.719786	0.336401	0.625087	0.618854	0.755248	0.651084	0.639135	0.776185	0.718101	0.753671	0.654103	0.852344	0.00516024
507	0.317348	0.356188	0.4058	0.402565	0.488459	0.37472	0.51105	0.443703	0.506607	0.566827	0.658771	0.755803	0.736945	0.748439	0.686901	0.865367	0.322102	0.355236	0.477334	0.467707	0.563787	0.37981	0.550499	0.462179	0.585299	0.626928	0.664645	0.776783	0.737896	0.767884	0.688237	0.877421	0.313029	0.343543	0.501958	0.576324	0.71963	0.336124	0.624807	0.61866	0.755023	0.650379	0.638756	0.775914	0.717709	0.753414	0.653773	0.852007	0.00509248
508	0.317197	0.355961	0.405646	0.402425	0.48831	0.374583	0.510775	0.443457	0.506343	0.566593	0.658539	0.7556	0.736738	0.7482	0.686685	0.865255	0.321971	0.355102	0.47708	0.467556	0.563638	0.379625	0.550197	0.461872	0.58511	0.626638	0.664311	0.776583	0.737541	0.767711	0.688007	0.877271	0.31282	0.343347	0.501728	0.576094	0.71938	0.335872	0.624512	0.618463	0.754781	0.649579	0.63848	0.775632	0.717401	0.75311	0.653495	0.85173	0.00503346
509	0.317046	0.355764	0.405457	0.402286	0.488171	0.374365	0.510557	0.443282	0.506095	0.566301	0.658211	0.755454	0.736505	0.747903	0.686463	0.865066	0.321861	0.35491	0.476899	0.467372	0.5635	0.379407	0.549884	0.461615	0.584931	0.626397	0.664053	0.776354	0.73723	0.767465	0.687713	0.877113	0.312679	0.343128	0.501555	0.575849	0.719218	0.335595	0.624216	0.618213	0.754551	0.648879	0.63819	0.77535	0.717072	0.7529	0.653163	0.851427	0.00498966
510	0.316915	0.355594	0.405285	0.402078	0.488039	0.3742	0.51033	0.443014	0.50589	0.566078	0.657936	0.755244	0.736285	0.747633	0.686229	0.864862	0.321666	0.354763	0.47672	0.467179	0.563319	0.379139	0.549624	0.461301	0.584709	0.626183	0.663842	0.776161	0.736914	0.767207	0.687387	0.876991	0.312508	0.342928	0.501367	0.575595	0.719039	0.33533	0.623934	0.618031	0.754305	0.648205	0.637958	0.775079	0.716678	0.752633	0.652812	0.851171	0.00491951
511	0.316706	0.355419	0.405089	0.401872	0.487881	0.373958	0.510063	0.442771	0.505668	0.565843	0.657731	0.75507	0.736	0.747336	0.685929	0.864658	0.321483	0.354591	0.476545	0.467016	0.563147	0.378938	0.54939	0.461028	0.584463	0.625961	0.663523	0.775935	0.736656	0.76693	0.687166	0.876834	0.312347	0.342678	0.501201	0.575338	0.718871	0.33502	0.623584	0.617853	0.754025	0.647564	0.637684	0.774815	0.716429	0.752375	0.652516	0.850956	0.00484696
512	0.316571	0.355273	0.404899	0.401679	0.487709	0.373744	0.509804	0.44257	0.505461	0.565614	0.657473	0.754934	0.735767	0.74709	0.685741	0.864485	0.321315	0.354437	0.476384	0.466824	0.563037	0.378678	0.549142	0.460727	0.584274	0.625725	0.663336	0.775724	0.736378	0.766664	0.686897	0.876642	0.312186	0.342451	0.501017	0.575111	0.71872	0.334794	0.623249	0.617664	0.753767	0.646969	0.637372	0.774518	0.71614	0.752066	0.652183	0.850639	0.00477753
513	0.316437	0.35513	0.40469	0.401496	0.487576	0.373505	0.509496	0.442367	0.50522	0.565342	0.657209	0.754736	0.735517	0.7469	0.685469	0.864296	0.321165	0.354251	0.476233	0.466641	0.562884	0.378462	0.548878	0.460505	0.584113	0.625501	0.663104	0.775531	0.736148	0.766402	0.686596	0.876461	0.312002	0.342224	0.500768	0.574802	0.71861	0.334457	0.62288	0.617471	0.753495	0.646195	0.637058	0.774234	0.715782	0.751822	0.65175	0.850436	0.00469466
514	0.316297	0.35497	0.40452	0.4013	0.487424	0.373281	0.509172	0.442121	0.505021	0.565092	0.656893	0.754517	0.735272	0.746625	0.685178	0.86413	0.321026	0.354105	0.476045	0.46651	0.562732	0.378237	0.54859	0.460167	0.583895	0.62528	0.662855	0.775323	0.735952	0.766132	0.686374	0.87629	0.311821	0.342027	0.500597	0.574528	0.718392	0.33415	0.622588	0.617247	0.753263	0.645591	0.636786	0.773948	0.715445	0.751546	0.651473	0.85016	0.00464698
515	0.316166	0.354839	0.404378	0.401148	0.487251	0.373079	0.508904	0.441877	0.504803	0.564845	0.656652	0.754301	0.73495	0.746442	0.684967	0.863949	0.320868	0.35396	0.475851	0.466358	0.56256	0.378015	0.548261	0.459871	0.583674	0.625055	0.66257	0.775129	0.735679	0.765868	0.686173	0.87606	0.311702	0.341852	0.500421	0.574345	0.718261	0.333884	0.622323	0.617072	0.75302	0.64499	0.636499	0.773656	0.715192	0.751143	0.651147	0.84991	0.0045925
516	0.315976	0.354643	0.404165	0.400987	0.487069	0.372888	0.508575	0.44165	0.504616	0.564631	0.656464	0.754084	0.734654	0.746236	0.684727	0.863713	0.320763	0.353771	0.475633	0.466213	0.562376	0.377745	0.548021	0.459621	0.583448	0.624804	0.662329	0.774948	0.735362	0.765638	0.685944	0.875857	0.311523	0.341631	0.500291	0.574034	0.718082	0.333613	0.622103	0.616844	0.752733	0.644346	0.636204	0.773341	0.71484	0.750797	0.650844	0.849711	0.00452706
517	0.315799	0.354476	0.403985	0.400826	0.486894	0.372705	0.508311	0.441432	0.504431	0.564416	0.65616	0.753858	0.734399	0.746013	0.684516	0.863529	0.320642	0.353657	0.475421	0.466036	0.562228	0.37755	0.547766	0.459386	0.583243	0.624553	0.662033	0.774738	0.735065	0.765379	0.68572	0.875693	0.311375	0.341415	0.50007	0.573777	0.717935	0.33337	0.621735	0.616635	0.75254	0.643697	0.635924	0.773041	0.714521	0.750513	0.650413	0.84947	0.00448261
518	0.315603	0.354336	0.403814	0.400647	0.486747	0.372481	0.507967	0.44121	0.504188	0.564162	0.655926	0.753627	0.73421	0.745784	0.684236	0.863331	0.320492	0.353464	0.475286	0.465878	0.562069	0.3773	0.547521	0.459158	0.583017	0.624326	0.661835	0.77456	0.734832	0.765127	0.685359	0.875529	0.311211	0.341221	0.499856	0.573559	0.717759	0.333144	0.621398	0.616446	0.752314	0.642842	0.635655	0.77275	0.71413	0.750243	0.649997	0.849216	0.00438912
519	0.315448	0.35417	0.403603	0.400451	0.486563	0.372291	0.507771	0.441037	0.503891	0.56393	0.655694	0.753379	0.73402	0.745576	0.683988	0.86317	0.320328	0.353297	0.475121	0.465697	0.561944	0.376997	0.547186	0.45884	0.582763	0.624113	0.661664	0.77436	0.734523	0.764948	0.685035	0.875422	0.311078	0.340976	0.499618	0.573273	0.717615	0.332878	0.621106	0.61624	0.75207	0.642286	0.635389	0.772478	0.713845	0.749954	0.649638	0.848911	0.00430586
520	0.315275	0.354001	0.40341	0.400298	0.486407	0.372087	0.507541	0.440862	0.503602	0.563694	0.655462	0.753179	0.733741	0.745345	0.683763	0.862993	0.320151	0.353076	0.474958	0.465524	0.561758	0.37677	0.546916	0.458583	0.582566	0.623897	0.661467	0.774169	0.734283	0.764726	0.684718	0.875266	0.310878	0.34079	0.499396	0.573034	0.717345	0.332622	0.620841	0.616017	0.751846	0.641532	0.635099	0.772214	0.713474	0.749618	0.649284	0.848647	0.00418366
521	0.315056	0.353796	0.403271	0.400156	0.48627	0.371915	0.507346	0.440651	0.5034	0.563433	0.655237	0.752948	0.733521	0.745133	0.683552	0.862804	0.319998	0.352875	0.474791	0.465352	0.561614	0.376418	0.546639	0.458358	0.582415	0.623646	0.661237	0.773939	0.734044	0.764501	0.684451	0.875059	0.310724	0.340575	0.49923	0.572774	0.717172	0.332388	0.620569	0.615826	0.751659	0.640782	0.634744	0.771839	0.713098	0.749367	0.648892	0.848311	0.00413478
522	0.314901	0.353675	0.40313	0.400015	0.486072	0.371673	0.507047	0.440446	0.503183	0.563137	0.655066	0.752732	0.733188	0.744905	0.683341	0.862591	0.319861	0.35269	0.4746	0.46523	0.561452	0.3762	0.54631	0.458135	0.582199	0.623372	0.660994	0.773693	0.733702	0.764259	0.684208	0.874912	0.310503	0.340371	0.499058	0.57258	0.717022	0.332159	0.620271	0.615661	0.751361	0.640167	0.634475	0.771588	0.712765	0.748907	0.648511	0.848044	0.00404291
523	0.314669	0.353501	0.403	0.399849	0.485906	0.371471	0.506802	0.440181	0.502929	0.562906	0.654869	0.752564	0.732934	0.744721	0.683019	0.86242	0.319686	0.35244	0.474435	0.46507	0.561347	0.375915	0.545954	0.457876	0.581986	0.623053	0.660682	0.773533	0.733478	0.763989	0.683989	0.874779	0.310331	0.340207	0.498916	0.572344	0.71683	0.331948	0.61998	0.61546	0.751116	0.639361	0.634124	0.771322	0.712412	0.748628	0.648192	0.847846	0.00392655
524	0.314517	0.353346	0.402812	0.399734	0.485799	0.371276	0.506521	0.439942	0.502701	0.562674	0.654622	0.752339	0.732688	0.744523	0.682831	0.862286	0.319546	0.352237	0.474197	0.464889	0.561207	0.375701	0.545653	0.457629	0.58176	0.622829	0.660384	0.773388	0.733263	0.763717	0.683726	0.874647	0.310159	0.34001	0.498702	0.572058	0.716651	0.331761	0.619678	0.615197	0.750855	0.638539	0.633831	0.771034	0.712014	0.748369	0.647805	0.847552	0.00383201
525	0.314352	0.35319	0.402627	0.399599	0.485569	0.37108	0.506314	0.439767	0.502438	0.562475	0.654399	0.752128	0.732415	0.744295	0.682591	0.862064	0.319405	0.352045	0.473955	0.464694	0.561003	0.375497	0.545331	0.457409	0.581531	0.622572	0.660134	0.773165	0.733073	0.763531	0.68347	0.874502	0.31	0.339811	0.498544	0.571789	0.716488	0.331467	0.619405	0.615039	0.750651	0.637716	0.633583	0.770765	0.711764	0.74811	0.64743	0.847253	0.00376696
526	0.314186	0.352994	0.402417	0.399408	0.485409	0.3709	0.50601	0.439498	0.502202	0.562274	0.654212	0.751908	0.732157	0.744056	0.682427	0.861843	0.319276	0.351864	0.473781	0.464539	0.560857	0.375233	0.545011	0.457172	0.581325	0.622291	0.659841	0.772946	0.732857	0.763307	0.68316	0.874343	0.309836	0.33961	0.498323	0.571579	0.716258	0.331167	0.619138	0.61488	0.750366	0.636942	0.633261	0.770499	0.711342	0.747815	0.6471	0.846995	0.00373758
527	0.314068	0.352747	0.402213	0.399168	0.485208	0.370755	0.505742	0.439323	0.502043	0.562047	0.653818	0.751688	0.731933	0.743807	0.682204	0.86165	0.319125	0.351688	0.473634	0.464338	0.560678	0.375075	0.544739	0.456945	0.581112	0.62199	0.659592	0.772784	0.732574	0.763009	0.682861	0.874197	0.309676	0.339425	0.498119	0.571387	0.716111	0.330928	0.618806	0.614661	0.750148	0.636324	0.633001	0.770223	0.711004	0.74757	0.646747	0.846668	0.00367919
528	0.313927	0.352542	0.402037	0.399026	0.485083	0.370575	0.505444	0.439182	0.501768	0.561867	0.653601	0.751489	0.731692	0.743634	0.681928	0.861495	0.318947	0.351532	0.473524	0.46417	0.560465	0.374807	0.544507	0.456674	0.580914	0.621789	0.659347	0.7726	0.73228	0.762786	0.682591	0.873996	0.309521	0.339251	0.497928	0.57114	0.715975	0.330667	0.618429	0.614495	0.749871	0.635509	0.632696	0.769875	0.710633	0.747271	0.646469	0.846424	0.00362171
529	0.313751	0.352334	0.401853	0.398874	0.484916	0.370334	0.505163	0.438958	0.501564	0.561617	0.653392	0.751298	0.731502	0.743413	0.681655	0.861331	0.318791	0.351336	0.473373	0.464021	0.560262	0.374625	0.544174	0.456365	0.580701	0.621561	0.659062	0.77242	0.731958	0.7625	0.682343	0.873798	0.309299	0.339023	0.49768	0.570904	0.715796	0.330433	0.618092	0.614299	0.7496	0.634946	0.632449	0.769496	0.710283	0.746851	0.646142	0.846195	0.00356248
530	0.313592	0.352148	0.401694	0.398732	0.484769	0.370121	0.504904	0.438724	0.501348	0.561392	0.65314	0.751152	0.731278	0.743212	0.681465	0.861174	0.318666	0.351178	0.473178	0.463876	0.560107	0.374409	0.543945	0.456138	0.580548	0.621354	0.658832	0.77217	0.731781	0.76227	0.682068	0.873661	0.30914	0.338833	0.49753	0.570657	0.715606	0.33013	0.617811	0.614104	0.749356	0.634288	0.632142	0.76918	0.70989	0.746543	0.645861	0.845842	0.00350739
531	0.313464	0.351983	0.401516	0.398551	0.484638	0.369883	0.504561	0.438518	0.501135	0.561147	0.652905	0.750973	0.731059	0.743026	0.681193	0.861015	0.318477	0.351018	0.473008	0.463771	0.559972	0.374198	0.543629	0.455931	0.580349	0.621014	0.658598	0.771909	0.731497	0.762053	0.681896	0.873457	0.308961	0.33858	0.497304	0.570392	0.715467	0.329878	0.617477	0.613915	0.74908	0.633684	0.631926	0.768844	0.709592	0.746285	0.645564	0.845487	0.00345368
532	0.313334	0.351809	0.401359	0.398364	0.484505	0.369702	0.504373	0.438371	0.50095	0.560915	0.652699	0.750764	0.730864	0.742824	0.680928	0.860813	0.318333	0.350808	0.472832	0.4636	0.559809	0.373953	0.543339	0.455651	0.580198	0.620784	0.658359	0.77168	0.731282	0.761809	0.681543	0.873315	0.308776	0.33835	0.497111	0.570154	0.715343	0.329623	0.617142	0.613691	0.748914	0.632987	0.631526	0.768629	0.709317	0.745941	0.645291	0.845208	0.0033845
533	0.313196	0.351626	0.401166	0.398229	0.484321	0.36948	0.504111	0.438196	0.500695	0.560685	0.652509	0.750562	0.730693	0.742617	0.680693	0.860659	0.31815	0.350633	0.472572	0.463448	0.559659	0.37372	0.543115	0.455474	0.580026	0.620536	0.657982	0.771505	0.731011	0.761633	0.681262	0.873119	0.308622	0.33818	0.496885	0.569954	0.715178	0.32933	0.61676	0.613456	0.748648	0.632388	0.63128	0.768379	0.708992	0.745569	0.644929	0.844942	0.00334534
534	0.313062	0.351485	0.401034	0.398058	0.484157	0.369269	0.503781	0.437955	0.500437	0.560414	0.652246	0.750381	0.730442	0.742402	0.680508	0.8605	0.318027	0.350488	0.472398	0.463233	0.559524	0.373457	0.542753	0.455206	0.579808	0.620317	0.657798	0.771321	0.730688	0.761343	0.681051	0.872946	0.308436	0.337977	0.496601	0.56975	0.715025	0.329074	0.616498	0.613216	0.748467	0.631669	0.631028	0.768142	0.708658	0.745251	0.644626	0.844669	0.00331722
535	0.312904	0.351328	0.400878	0.397909	0.483981	0.369154	0.503535	0.43775	0.500159	0.560172	0.65197	0.750177	0.730202	0.742202	0.680243	0.860323	0.317827	0.35034	0.472225	0.463058	0.559345	0.373211	0.542508	0.454969	0.579584	0.620118	0.657556	0.771135	0.730534	0.761107	0.680811	0.872805	0.308256	0.337755	0.496349	0.569529	0.714843	0.328841	0.61622	0.61295	0.748218	0.630855	0.630719	0.767809	0.708352	0.744972	0.644344	0.844385	0.00321205
536	0.312755	0.351177	0.400676	0.397719	0.483847	0.368999	0.503275	0.437555	0.499939	0.559896	0.651789	0.749995	0.72994	0.742038	0.679905	0.860105	0.317709	0.350202	0.472094	0.4629	0.559172	0.372945	0.542324	0.454714	0.579435	0.619921	0.657336	0.770889	0.730298	0.76085	0.680547	0.872628	0.308113	0.337592	0.496127	0.569341	0.71467	0.328557	0.615955	0.612684	0.748006	0.630261	0.630395	0.767502	0.70809	0.744692	0.644035	0.844113	0.00313024
537	0.312576	0.351022	0.400529	0.397622	0.483719	0.368813	0.503066	0.437262	0.499722	0.559644	0.651631	0.749759	0.729661	0.741833	0.679636	0.859916	0.317578	0.350012	0.471929	0.462732	0.559022	0.372705	0.542086	0.454537	0.579255	0.619645	0.657081	0.770719	0.729971	0.760636	0.68028	0.872484	0.307977	0.337383	0.495919	0.569147	0.714501	0.328333	0.615617	0.612509	0.747734	0.629478	0.63015	0.767218	0.707795	0.744401	0.643755	0.843817	0.00305671
538	0.312433	0.350863	0.400398	0.397504	0.483545	0.368558	0.502796	0.437072	0.499513	0.559467	0.651406	0.749584	0.729463	0.74159	0.679395	0.859712	0.317445	0.349844	0.471768	0.462608	0.558835	0.372449	0.541859	0.454342	0.579012	0.619484	0.6568	0.770483	0.729665	0.76035	0.680026	0.872338	0.307795	0.337148	0.495691	0.568908	0.714389	0.328096	0.615357	0.612283	0.747557	0.628771	0.629883	0.766894	0.707345	0.744087	0.643348	0.843519	0.00299824
539	0.312288	0.350704	0.400201	0.397361	0.483418	0.36837	0.502569	0.436844	0.499322	0.559242	0.65119	0.749357	0.72921	0.741384	0.679144	0.859561	0.317322	0.349677	0.471603	0.462426	0.558674	0.372243	0.541675	0.454108	0.578797	0.619254	0.656547	0.770267	0.729477	0.760131	0.679754	0.872197	0.307645	0.337001	0.495522	0.568642	0.714202	0.327834	0.615043	0.612074	0.747356	0.628016	0.629596	0.76658	0.707011	0.743797	0.642978	0.843272	0.00296996
540	0.312091	0.350567	0.399954	0.397204	0.483247	0.36818	0.502277	0.436656	0.499146	0.55906	0.650956	0.749244	0.728976	0.741163	0.678856	0.859375	0.317163	0.349503	0.471423	0.462308	0.558485	0.372045	0.541349	0.453822	0.578594	0.619088	0.656363	0.770117	0.729215	0.75989	0.679443	0.872019	0.30751	0.33678	0.495312	0.568445	0.714028	0.327637	0.614767	0.611868	0.747126	0.6274	0.629323	0.766267	0.706669	0.743464	0.642635	0.843018	0.00289657
541	0.311957	0.350414	0.399751	0.397108	0.483046	0.367983	0.502019	0.436425	0.498958	0.558837	0.650684	0.749034	0.728746	0.740933	0.678588	0.859175	0.317007	0.349333	0.471263	0.462122	0.558335	0.371795	0.541028	0.453616	0.578333	0.618801	0.6561	0.76995	0.728973	0.759639	0.679185	0.871878	0.307328	0.336477	0.495114	0.568159	0.713869	0.327381	0.614463	0.611681	0.746891	0.626721	0.629081	0.765883	0.706241	0.743148	0.642333	0.842636	0.00282483
542	0.311774	0.35023	0.399548	0.396955	0.482872	0.367795	0.50177	0.436211	0.498729	0.558588	0.650356	0.748853	0.72856	0.740704	0.678339	0.858961	0.316856	0.349147	0.471026	0.461963	0.558201	0.371623	0.540725	0.453309	0.578145	0.618617	0.65589	0.769728	0.728744	0.75942	0.678913	0.871704	0.307164	0.336283	0.49494	0.567995	0.713622	0.327098	0.614123	0.611522	0.746589	0.62604	0.628856	0.765666	0.705824	0.742844	0.641976	0.842331	0.00277301
543	0.311623	0.350056	0.399433	0.39683	0.4827	0.36767	0.501515	0.435948	0.498477	0.558357	0.650083	0.748613	0.728333	0.740461	0.678175	0.858761	0.316674	0.348951	0.470829	0.461765	0.558052	0.371402	0.54046	0.452985	0.577933	0.618407	0.655646	0.769547	0.728508	0.759119	0.678562	0.871494	0.30702	0.336101	0.494726	0.567783	0.713456	0.326854	0.613894	0.611354	0.746386	0.625373	0.628684	0.765419	0.705499	0.742493	0.641545	0.842095	0.00271276
544	0.311434	0.349866	0.39928	0.396681	0.482502	0.367505	0.501163	0.435678	0.498281	0.558166	0.649861	0.748411	0.728009	0.740259	0.677977	0.858602	0.316515	0.348742	0.470701	0.46162	0.557901	0.371212	0.540141	0.452749	0.577746	0.618188	0.65545	0.769372	0.728245	0.758832	0.678226	0.871316	0.306866	0.335929	0.494587	0.567556	0.713262	0.326635	0.613657	0.611159	0.746173	0.624682	0.628376	0.765079	0.705251	0.742225	0.641192	0.841782	0.00264043
545	0.31128	0.349704	0.399127	0.396513	0.482352	0.367318	0.500918	0.435466	0.498057	0.557969	0.649672	0.748157	0.727804	0.740006	0.677741	0.858397	0.316394	0.34854	0.470547	0.461445	0.557718	0.370984	0.539891	0.452578	0.577531	0.617934	0.655178	0.769158	0.728048	0.758599	0.677922	0.871111	0.306684	0.33569	0.494364	0.567251	0.713061	0.326409	0.61329	0.610972	0.745799	0.623979	0.628086	0.764752	0.704903	0.741908	0.640899	0.841408	0.00256593
546	0.311073	0.349541	0.398957	0.396346	0.482178	0.367144	0.500646	0.435242	0.49789	0.557728	0.649421	0.747942	0.727538	0.739858	0.677533	0.858216	0.316214	0.348351	0.470347	0.461294	0.557603	0.370668	0.539608	0.45234	0.577335	0.617661	0.655045	0.768984	0.727705	0.758344	0.677684	0.870913	0.306481	0.335508	0.494213	0.567011	0.712904	0.326188	0.612942	0.610756	0.74554	0.623131	0.627814	0.764502	0.704543	0.741697	0.640633	0.841134	0.00250147
547	0.310909	0.349363	0.398784	0.396208	0.482008	0.366986	0.5004	0.435012	0.497724	0.557491	0.649243	0.747689	0.727316	0.739574	0.677268	0.858031	0.316068	0.348119	0.4702	0.461129	0.557435	0.370454	0.539373	0.452112	0.577099	0.617458	0.65479	0.768825	0.727525	0.758059	0.677503	0.870721	0.306341	0.335285	0.494038	0.566764	0.712677	0.32597	0.612703	0.610567	0.745288	0.622159	0.627409	0.764211	0.704239	0.741362	0.640395	0.840885	0.00244055
548	0.310708	0.349195	0.398631	0.396088	0.481822	0.366806	0.500148	0.434789	0.497515	0.557328	0.649012	0.747474	0.727126	0.739356	0.677024	0.857863	0.315889	0.347937	0.469976	0.460945	0.557296	0.37025	0.53912	0.451908	0.576885	0.617272	0.654574	0.768642	0.727277	0.757882	0.677284	0.870532	0.306177	0.335075	0.493869	0.566482	0.712544	0.325724	0.612357	0.610318	0.745006	0.621196	0.627118	0.763901	0.703833	0.740961	0.640041	0.840599	0.00237056
549	0.310509	0.349026	0.398436	0.395863	0.481685	0.366576	0.499913	0.434601	0.49731	0.55714	0.648811	0.747282	0.726934	0.739065	0.676819	0.857658	0.315767	0.347755	0.469806	0.460799	0.557169	0.369925	0.538774	0.451677	0.576675	0.617044	0.654296	0.768394	0.727032	0.757613	0.67705	0.870364	0.306011	0.33488	0.493655	0.566218	0.712349	0.325416	0.612012	0.610097	0.744719	0.62056	0.626769	0.763654	0.703361	0.740634	0.639705	0.840285	0.00232367
550	0.310389	0.348853	0.398263	0.395679	0.481477	0.366369	0.499598	0.434453	0.497083	0.556866	0.648574	0.74705	0.726657	0.738886	0.676555	0.857495	0.3156	0.347585	0.469628	0.460625	0.556979	0.369728	0.53847	0.45143	0.576513	0.616831	0.654067	0.768228	0.726788	0.757374	0.676844	0.870162	0.305826	0.334613	0.493476	0.56596	0.712183	0.325081	0.611732	0.609924	0.744432	0.619721	0.626476	0.763255	0.702982	0.74031	0.639302	0.840121	0.00225018
551	0.310185	0.348661	0.398133	0.395505	0.48131	0.366135	0.499391	0.434267	0.49685	0.556642	0.648382	0.746898	0.726415	0.738685	0.676233	0.857354	0.315459	0.347382	0.469447	0.46047	0.556839	0.369559	0.538158	0.451194	0.576366	0.616578	0.653769	0.76805	0.72648	0.757157	0.676615	0.869981	0.305666	0.334417	0.493233	0.565722	0.712009	0.324805	0.611462	0.609727	0.744255	0.618879	0.626144	0.762929	0.702573	0.740012	0.638894	0.839864	0.00217479
552	0.310045	0.348431	0.397969	0.395378	0.481162	0.365928	0.499136	0.433982	0.496643	0.556452	0.648208	0.746702	0.726171	0.738385	0.676023	0.857177	0.315308	0.347252	0.469237	0.460282	0.55659	0.369375	0.537894	0.45096	0.576148	0.616334	0.653543	0.767808	0.726238	0.756948	0.676369	0.869801	0.305521	0.334209	0.493099	0.565531	0.711799	0.324551	0.611181	0.609484	0.74401	0.618269	0.62583	0.762607	0.702314	0.739717	0.638612	0.839628	0.00211486
553	0.309884	0.348193	0.397819	0.395215	0.481009	0.365731	0.498818	0.433773	0.496428	0.556194	0.647951	0.746441	0.725927	0.73816	0.675743	0.857071	0.315149	0.347057	0.469054	0.460116	0.556455	0.36912	0.537602	0.450735	0.575994	0.616125	0.653241	0.767592	0.726041	0.756674	0.676163	0.869585	0.30535	0.334071	0.492896	0.565234	0.711628	0.324205	0.610902	0.60926	0.743747	0.617554	0.625509	0.762337	0.702043	0.739507	0.638224	0.839308	0.00206163
554	0.309746	0.348007	0.397646	0.395042	0.480843	0.365553	0.498608	0.433522	0.496192	0.555956	0.647661	0.746263	0.725648	0.737897	0.675449	0.856922	0.315026	0.346883	0.468922	0.460007	0.556271	0.368878	0.537348	0.450378	0.575794	0.61594	0.653061	0.767418	0.725733	0.75641	0.675907	0.869441	0.305191	0.333859	0.49267	0.564975	0.711494	0.323962	0.610559	0.609081	0.743495	0.61673	0.625161	0.762055	0.701703	0.739223	0.637853	0.839117	0.00201194
555	0.309637	0.347853	0.397483	0.394867	0.480674	0.365358	0.498287	0.433303	0.495939	0.555748	0.647418	0.746018	0.725439	0.737664	0.675187	0.856698	0.314905	0.346722	0.468787	0.459851	0.556117	0.368661	0.537098	0.450129	0.575543	0.615741	0.652779	0.767213	0.725548	0.756108	0.675538	0.869263	0.305043	0.333694	0.492489	0.564736	0.711263	0.32376	0.610231	0.608823	0.743196	0.61591	0.624882	0.761827	0.701389	0.738931	0.637495	0.838837	0.00196335
556	0.309483	0.347684	0.397299	0.394689	0.480495	0.365211	0.498021	0.43316	0.495786	0.555474	0.647192	0.745824	0.725213	0.737469	0.674978	0.856563	0.314734	0.346573	0.468607	0.459697	0.555946	0.368436	0.536841	0.449951	0.575298	0.615501	0.652566	0.767037	0.725221	0.755926	0.675297	0.869116	0.304839	0.333448	0.492235	0.56451	0.711085	0.323497	0.609841	0.608578	0.743008	0.615025	0.624594	0.761539	0.701103	0.738625	0.637159	0.838627	0.0019088
557	0.309318	0.347525	0.397176	0.394512	0.480336	0.36502	0.49781	0.432931	0.495548	0.555277	0.646982	0.745628	0.724828	0.737282	0.674729	0.856388	0.314562	0.346379	0.468447	0.459552	0.555796	0.36818	0.536528	0.449702	0.574993	0.615263	0.652316	0.766879	0.72503	0.755633	0.675087	0.868932	0.304658	0.33322	0.492015	0.564295	0.710896	0.323261	0.609576	0.608371	0.742775	0.614228	0.624267	0.761218	0.700817	0.738345	0.636876	0.83834	0.00187667
558	0.309148	0.347368	0.396988	0.394343	0.480163	0.364839	0.497518	0.432755	0.495298	0.555076	0.646774	0.745427	0.72465	0.737071	0.674458	0.856184	0.314416	0.346198	0.468308	0.459393	0.555638	0.367932	0.536246	0.449385	0.574737	0.615044	0.65203	0.766651	0.72481	0.75538	0.674796	0.868803	0.304473	0.332992	0.491858	0.564056	0.710749	0.323057	0.609295	0.60814	0.742498	0.613389	0.624047	0.760894	0.700492	0.73801	0.636511	0.837997	0.00183428
559	0.309006	0.34719	0.396827	0.394221	0.480005	0.364673	0.497323	0.43247	0.495058	0.554833	0.646583	0.745246	0.72444	0.736849	0.674243	0.856002	0.314284	0.346038	0.468133	0.459243	0.555471	0.367723	0.536004	0.449203	0.574517	0.614786	0.65176	0.76646	0.724587	0.755141	0.674575	0.868616	0.304324	0.33281	0.491695	0.563815	0.710586	0.322872	0.609018	0.607835	0.742265	0.612316	0.623713	0.760617	0.700191	0.737656	0.636173	0.837712	0.00175606
560	0.308831	0.347004	0.396708	0.394075	0.479826	0.364521	0.497056	0.432238	0.494924	0.554611	0.646337	0.745056	0.724157	0.736681	0.674051	0.855846	0.314113	0.345872	0.467968	0.459067	0.555303	0.367473	0.535739	0.448983	0.574316	0.614576	0.65155	0.766302	0.724331	0.754941	0.674404	0.868476	0.30413	0.332571	0.491546	0.563521	0.710403	0.322629	0.608795	0.607605	0.74191	0.611567	0.623474	0.76038	0.699915	0.737312	0.635839	0.83751	0.00172286
561	0.308724	0.346854	0.396498	0.393957	0.479681	0.364254	0.496849	0.432019	0.494727	0.554321	0.64615	0.744858	0.723936	0.736456	0.673766	0.855682	0.313973	0.345705	0.467779	0.458943	0.555153	0.36731	0.535422	0.448729	0.574066	0.614373	0.651298	0.766092	0.724129	0.754704	0.674191	0.868341	0.303977	0.33239	0.491367	0.563384	0.710196	0.322377	0.608394	0.607397	0.741634	0.6106	0.623157	0.760061	0.69964	0.737031	0.635567	0.837215	0.00170274
562	0.308594	0.346642	0.396308	0.393778	0.479551	0.364117	0.496579	0.431766	0.494546	0.554104	0.645912	0.744682	0.723703	0.736227	0.673568	0.855543	0.31382	0.345534	0.467568	0.458821	0.554999	0.367095	0.535196	0.448533	0.573845	0.614125	0.650963	0.765848	0.723906	0.754483	0.673908	0.868155	0.303823	0.33222	0.49117	0.56316	0.710055	0.322075	0.608107	0.60717	0.741392	0.609584	0.622861	0.759758	0.699306	0.73666	0.635222	0.836963	0.00165716
563	0.308451	0.346464	0.396164	0.393603	0.479403	0.363933	0.496337	0.431518	0.494342	0.553854	0.645717	0.744469	0.723464	0.736036	0.673299	0.855372	0.313659	0.34538	0.46733	0.458724	0.554851	0.366902	0.534939	0.448366	0.573643	0.613837	0.650665	0.76569	0.723641	0.754197	0.673653	0.867972	0.303676	0.332061	0.491025	0.562989	0.709903	0.321866	0.607751	0.606962	0.741095	0.608687	0.622636	0.759454	0.698995	0.73638	0.634924	0.83666	0.00160893
564	0.308272	0.346329	0.396034	0.393454	0.479232	0.363719	0.496099	0.431279	0.494172	0.553585	0.64553	0.744311	0.723226	0.73579	0.673016	0.855183	0.313498	0.345197	0.46714	0.458495	0.554695	0.366729	0.534666	0.448099	0.573447	0.613598	0.650449	0.765488	0.723412	0.753924	0.673376	0.867806	0.303558	0.33187	0.490856	0.562743	0.709779	0.321644	0.607436	0.606785	0.740749	0.607817	0.622408	0.759108	0.698716	0.736018	0.634555	0.836348	0.00156929
565	0.308112	0.34619	0.395911	0.393283	0.479109	0.363498	0.495793	0.431073	0.493929	0.553306	0.64531	0.744128	0.723022	0.735556	0.672808	0.855007	0.313359	0.344997	0.466924	0.458324	0.554573	0.366533	0.534438	0.447885	0.573259	0.613341	0.650255	0.765266	0.72313	0.753666	0.673065	0.867617	0.303466	0.331685	0.490649	0.562513	0.709599	0.321429	0.607176	0.606568	0.740473	0.60723	0.622133	0.758882	0.698504	0.735701	0.634282	0.836158	0.00152734
566	0.307956	0.345991	0.395769	0.393141	0.478947	0.363289	0.495574	0.430797	0.493767	0.553064	0.645042	0.743972	0.722722	0.735314	0.672573	0.854837	0.313233	0.344854	0.466758	0.458185	0.554395	0.366319	0.534126	0.447582	0.573039	0.613147	0.650023	0.765043	0.722894	0.753388	0.672852	0.867403	0.303337	0.331472	0.490448	0.562269	0.709409	0.321216	0.606802	0.60641	0.740256	0.606241	0.621887	0.758614	0.69817	0.735492	0.633932	0.835915	0.00148677
567	0.307796	0.345854	0.395578	0.393003	0.478775	0.363117	0.495302	0.43062	0.493593	0.552843	0.644852	0.743719	0.722508	0.735145	0.672323	0.854652	0.313089	0.34469	0.466641	0.458001	0.554272	0.366093	0.533868	0.447376	0.572818	0.612905	0.649784	0.764832	0.722703	0.753163	0.672583	0.867209	0.303188	0.33124	0.490219	0.562076	0.709207	0.320935	0.606521	0.606221	0.739967	0.605613	0.621584	0.75823	0.697793	0.735217	0.633578	0.835692	0.00143736
568	0.307618	0.345693	0.395407	0.392857	0.478489	0.362931	0.49506	0.430427	0.493402	0.552636	0.644628	0.743526	0.722265	0.734929	0.672076	0.854463	0.312943	0.344544	0.466459	0.457867	0.554136	0.365859	0.533591	0.447179	0.572615	0.61268	0.649624	0.764572	0.722469	0.752963	0.672227	0.867014	0.303005	0.331128	0.490004	0.561819	0.709031	0.320726	0.606264	0.60604	0.739678	0.604662	0.621191	0.757989	0.697569	0.734886	0.633229	0.835395	0.00141913
569	0.307459	0.345528	0.395257	0.392733	0.478373	0.362666	0.494816	0.43023	0.493212	0.552436	0.644411	0.743291	0.721985	0.734719	0.671845	0.854318	0.312783	0.34438	0.466292	0.457754	0.554	0.3656	0.533307	0.446979	0.572411	0.612421	0.649412	0.764407	0.722208	0.752709	0.671937	0.866836	0.302855	0.330949	0.489822	0.561607	0.70884	0.320455	0.605997	0.605766	0.739418	0.603753	0.621025	0.757735	0.697259	0.734568	0.63288	0.835084	0.00138558
570	0.307277	0.345341	0.39508	0.392578	0.478218	0.362467	0.494658	0.430053	0.492995	0.552213	0.644217	0.743095	0.721731	0.734517	0.671631	0.85419	0.312628	0.344229	0.46616	0.457593	0.553827	0.365365	0.533023	0.446728	0.572247	0.612227	0.649199	0.764193	0.721968	0.752498	0.671701	0.866658	0.302706	0.330787	0.489663	0.561356	0.708641	0.320254	0.605651	0.605556	0.739149	0.60291	0.620783	0.757335	0.696964	0.734304	0.632618	0.834828	0.00132944
571	0.307088	0.345179	0.394899	0.392392	0.478055	0.362312	0.49437	0.429898	0.492783	0.552008	0.643982	0.742889	0.721497	0.734338	0.6714	0.854027	0.312474	0.344031	0.465985	0.457425	0.553669	0.365159	0.5328	0.446576	0.57202	0.611998	0.648966	0.764028	0.721641	0.752284	0.671424	0.866465	0.302519	0.330586	0.489452	0.561136	0.708469	0.319989	0.605389	0.605366	0.738935	0.602292	0.620582	0.757069	0.696686	0.73406	0.632363	0.834639	0.00131228
572	0.30697	0.345033	0.394768	0.392246	0.477896	0.362119	0.494112	0.429699	0.492547	0.55175	0.643686	0.742697	0.721223	0.734123	0.671201	0.853848	0.312301	0.343823	0.465774	0.457297	0.553548	0.364933	0.532552	0.44638	0.571856	0.611796	0.648751	0.76379	0.721365	0.752089	0.671195	0.866327	0.302376	0.330385	0.489251	0.560952	0.708322	0.319702	0.605031	0.60515	0.738706	0.60134	0.620277	0.756789	0.696402	0.733789	0.632035	0.834356	0.00128653
573	0.30682	0.344906	0.394594	0.392102	0.477732	0.361927	0.493853	0.429458	0.492289	0.551549	0.643453	0.742511	0.720974	0.733903	0.671009	0.853675	0.312161	0.343696	0.4656	0.457147	0.553384	0.364695	0.532322	0.446156	0.571622	0.611645	0.648566	0.763604	0.721076	0.751837	0.670904	0.866184	0.302228	0.330232	0.489076	0.560633	0.708105	0.319488	0.604625	0.604897	0.738394	0.600749	0.619993	0.756534	0.696123	0.733501	0.63172	0.834086	0.00125587
574	0.306645	0.344779	0.394442	0.391932	0.477592	0.361734	0.493656	0.429253	0.492071	0.551351	0.643229	0.742365	0.720767	0.733638	0.670804	0.853505	0.312048	0.34349	0.465479	0.45702	0.553247	0.364493	0.532057	0.445912	0.571435	0.611398	0.648367	0.763433	0.72083	0.751573	0.670722	0.866012	0.302071	0.329971	0.488866	0.56032	0.707923	0.319258	0.604303	0.604634	0.738123	0.599997	0.619741	0.75625	0.69575	0.733203	0.631452	0.833818	0.00123807
575	0.306482	0.344631	0.394277	0.391799	0.477416	0.361543	0.493385	0.428992	0.491921	0.551182	0.64301	0.742162	0.720543	0.733451	0.670573	0.853323	0.311874	0.343302	0.465285	0.456846	0.553087	0.364278	0.531812	0.445606	0.571279	0.61117	0.648139	0.763206	0.720551	0.751431	0.670434	0.865809	0.301918	0.329757	0.4887	0.56015	0.707746	0.319056	0.603997	0.604413	0.737913	0.599235	0.619474	0.755971	0.695361	0.732898	0.631077	0.833472	0.00119594
576	0.306327	0.344497	0.394148	0.391654	0.477293	0.361352	0.49315	0.428744	0.49168	0.550975	0.642801	0.741952	0.720307	0.733226	0.670262	0.853178	0.311716	0.343118	0.46514	0.456684	0.552927	0.364008	0.531511	0.445429	0.571068	0.610996	0.647942	0.763012	0.720311	0.751166	0.670157	0.865652	0.301734	0.329574	0.488456	0.55988	0.707536	0.318764	0.603766	0.604161	0.737686	0.598313	0.619176	0.755711	0.695026	0.732594	0.630736	0.833174	0.00115716
577	0.306168	0.344318	0.393959	0.391491	0.477135	0.36116	0.49288	0.428561	0.491425	0.550749	0.642537	0.741715	0.720033	0.73304	0.670028	0.853011	0.311556	0.342947	0.464935	0.456515	0.552759	0.363763	0.531204	0.44525	0.570829	0.610725	0.647703	0.762856	0.720053	0.750953	0.669905	0.86547	0.301547	0.329364	0.488241	0.559651	0.707388	0.318443	0.603442	0.603919	0.737383	0.597584	0.618864	0.75546	0.694711	0.732378	0.630458	0.832858	0.00113435
578	0.306027	0.344133	0.393801	0.391367	0.476963	0.360935	0.492676	0.42832	0.491248	0.550488	0.642371	0.741531	0.719737	0.732788	0.669775	0.852845	0.311406	0.34279	0.464734	0.456363	0.552586	0.363543	0.530888	0.445003	0.570684	0.610491	0.647451	0.762705	0.719781	0.75068	0.66964	0.865286	0.301414	0.32919	0.488025	0.559425	0.707183	0.318238	0.603062	0.603726	0.737111	0.596646	0.618608	0.755073	0.694444	0.732022	0.63016	0.832539	0.00109879
579	0.305869	0.343934	0.393626	0.391192	0.476837	0.360747	0.492418	0.428178	0.491014	0.550254	0.642158	0.741391	0.719474	0.732606	0.669558	0.852662	0.311267	0.34261	0.464548	0.456217	0.552448	0.363287	0.530655	0.44479	0.570491	0.610187	0.64717	0.76251	0.719528	0.750426	0.669398	0.865123	0.301252	0.328989	0.487806	0.559204	0.706999	0.31798	0.602671	0.603554	0.736778	0.595897	0.618344	0.754706	0.694049	0.731704	0.629853	0.832285	0.00107068
580	0.305694	0.343803	0.393456	0.39104	0.47668	0.360595	0.492218	0.427935	0.490774	0.55004	0.641992	0.741204	0.719234	0.732368	0.669354	0.852508	0.311122	0.342453	0.464406	0.456037	0.552278	0.363124	0.53033	0.444569	0.570299	0.609948	0.64691	0.762351	0.71929	0.750185	0.669065	0.864946	0.30106	0.328862	0.487654	0.558955	0.706786	0.31775	0.60231	0.603328	0.736545	0.595034	0.618075	0.754393	0.693674	0.731437	0.629575	0.832006	0.0010419
581	0.305572	0.343639	0.393295	0.39085	0.476506	0.36042	0.491997	0.427721	0.490548	0.549838	0.641762	0.741008	0.719057	0.732114	0.669158	0.852339	0.310974	0.34223	0.464198	0.455877	0.552156	0.362864	0.5301	0.444381	0.570058	0.609695	0.646685	0.76214	0.719052	0.749948	0.668859	0.864784	0.300914	0.328741	0.487408	0.55872	0.706602	0.317504	0.601969	0.603166	0.736322	0.594253	0.617773	0.754023	0.693369	0.731168	0.629351	0.831693	0.00102277
582	0.305432	0.343487	0.393105	0.390705	0.476362	0.360232	0.491747	0.427501	0.490337	0.549633	0.641533	0.740835	0.718827	0.731901	0.668946	0.852142	0.310857	0.342065	0.464034	0.455725	0.551987	0.362661	0.529816	0.444176	0.569849	0.609472	0.646392	0.761993	0.718809	0.749701	0.668603	0.864638	0.300734	0.328557	0.487143	0.558454	0.706347	0.317339	0.601683	0.602991	0.735994	0.593574	0.617491	0.753708	0.69303	0.730858	0.629027	0.831458	0.00100988
583	0.305286	0.34331	0.392962	0.390602	0.476177	0.360062	0.49147	0.427282	0.490131	0.549445	0.641198	0.74062	0.718605	0.731701	0.66876	0.851992	0.310724	0.341908	0.463881	0.455568	0.551815	0.362453	0.529577	0.444021	0.5696	0.609206	0.646231	0.761791	0.718535	0.749454	0.668286	0.864442	0.300553	0.328378	0.486937	0.558244	0.706148	0.317132	0.601454	0.602807	0.735678	0.593022	0.617199	0.753431	0.692725	0.73061	0.628613	0.831212	0.00100741
584	0.30516	0.343097	0.39282	0.390455	0.476014	0.359919	0.491316	0.427136	0.489949	0.549247	0.641002	0.740455	0.71835	0.731469	0.668512	0.851841	0.310563	0.341695	0.463702	0.455424	0.551648	0.362249	0.529298	0.443793	0.569401	0.608967	0.646	0.761613	0.718266	0.749252	0.668056	0.864278	0.300406	0.328196	0.486758	0.558023	0.705962	0.31688	0.601091	0.602542	0.735355	0.592318	0.616966	0.753146	0.692366	0.73029	0.628243	0.830823	0.000990192
585	0.305032	0.342896	0.392703	0.390319	0.475866	0.359774	0.49101	0.426927	0.48974	0.549015	0.64073	0.740228	0.718097	0.731288	0.668314	0.851661	0.31047	0.341524	0.46356	0.455259	0.551448	0.362026	0.5291	0.443517	0.569174	0.608806	0.645616	0.761419	0.718112	0.748973	0.667848	0.864127	0.300256	0.32802	0.486587	0.557797	0.705739	0.31663	0.600823	0.602375	0.735021	0.591305	0.61671	0.752915	0.69211	0.729976	0.627854	0.830555	0.000978801
586	0.304861	0.342766	0.392571	0.390165	0.47567	0.359509	0.490785	0.42665	0.489576	0.548799	0.64052	0.740051	0.717898	0.731048	0.668136	0.851481	0.31031	0.341348	0.463422	0.45512	0.55131	0.361817	0.528815	0.443312	0.568951	0.608609	0.645373	0.761206	0.717883	0.748786	0.667587	0.863882	0.30013	0.327854	0.486441	0.557562	0.705605	0.316424	0.600459	0.60215	0.734681	0.590522	0.616497	0.752545	0.691769	0.729684	0.627448	0.830282	0.000970785
587	0.304711	0.342544	0.392453	0.389992	0.475464	0.35933	0.490541	0.426391	0.489363	0.548567	0.640366	0.739853	0.717688	0.730786	0.667886	0.851331	0.310175	0.341166	0.463204	0.455009	0.551143	0.36157	0.528514	0.442966	0.568747	0.608377	0.645119	0.760994	0.717677	0.748544	0.667316	0.863756	0.299978	0.327688	0.48628	0.557277	0.705467	0.316207	0.600139	0.602013	0.734402	0.589129	0.61628	0.752238	0.691455	0.729474	0.627064	0.830024	0.000967597
588	0.304583	0.342381	0.392302	0.389767	0.475247	0.359119	0.490403	0.42618	0.489218	0.548373	0.640151	0.739698	0.7175	0.730552	0.667677	0.851162	0.310004	0.340977	0.463035	0.454834	0.550982	0.361303	0.528225	0.442748	0.568541	0.60813	0.64493	0.760835	0.717442	0.748325	0.667024	0.863638	0.29983	0.32741	0.486048	0.557007	0.705279	0.315899	0.599834	0.601822	0.734044	0.588249	0.616045	0.752019	0.691196	0.729217	0.626797	0.829737	0.000957808
589	0.304462	0.342187	0.39212	0.389617	0.475092	0.358981	0.490233	0.425995	0.488978	0.548167	0.639932	0.739453	0.717245	0.730363	0.667441	0.851038	0.309852	0.340801	0.462856	0.454658	0.550828	0.361006	0.527985	0.442544	0.568335	0.607871	0.64472	0.760541	0.71722	0.748061	0.666782	0.86342	0.299711	0.327235	0.485867	0.55674	0.705094	0.315663	0.599523	0.601644	0.733719	0.587246	0.615818	0.751627	0.690889	0.728908	0.626491	0.829363	0.000944183
590	0.304323	0.342011	0.391923	0.38948	0.474942	0.358805	0.490086	0.425765	0.48878	0.54783	0.63971	0.739295	0.717038	0.73014	0.667211	0.850887	0.309711	0.340627	0.462729	0.454477	0.550689	0.360741	0.527746	0.442292	0.568167	0.607628	0.644495	0.760354	0.71694	0.747825	0.666498	0.863231	0.299516	0.327009	0.48564	0.556493	0.704892	0.315439	0.599283	0.601446	0.733452	0.586146	0.615581	0.751252	0.690561	0.728622	0.626127	0.82909	0.000931206
591	0.304174	0.341809	0.391747	0.38927	0.474776	0.358634	0.489837	0.425555	0.488584	0.547597	0.639565	0.739098	0.716787	0.729948	0.667008	0.850776	0.30957	0.340464	0.462619	0.454301	0.550536	0.360582	0.527517	0.442075	0.567988	0.60744	0.644257	0.760134	0.716693	0.747605	0.666241	0.863063	0.299362	0.326824	0.485446	0.556204	0.704662	0.315191	0.598952	0.601309	0.733091	0.58546	0.615297	0.750957	0.690189	0.728315	0.62577	0.828799	0.000926103
592	0.304008	0.341644	0.391574	0.389056	0.474645	0.358487	0.489545	0.425366	0.488382	0.547371	0.639328	0.738895	0.716501	0.729734	0.666741	0.850573	0.309431	0.340308	0.462443	0.45411	0.550398	0.360382	0.527214	0.441876	0.56781	0.607214	0.64407	0.759944	0.716383	0.747457	0.665947	0.862902	0.299201	0.326633	0.485254	0.555994	0.704457	0.314986	0.598619	0.601072	0.73282	0.584639	0.615043	0.750673	0.689935	0.728063	0.625406	0.828513	0.000923805
593	0.303874	0.341497	0.391364	0.388909	0.474485	0.358335	0.48927	0.425181	0.488202	0.547134	0.639041	0.73864	0.716305	0.729474	0.666534	0.850419	0.309291	0.340141	0.462201	0.453927	0.55021	0.360145	0.526959	0.441632	0.567607	0.607007	0.64377	0.759762	0.716066	0.747246	0.665789	0.862762	0.29908	0.326335	0.485023	0.555695	0.704268	0.3148	0.598268	0.600847	0.732565	0.583776	0.614775	0.750335	0.689668	0.727785	0.625082	0.828246	0.000918277
594	0.303727	0.341313	0.391224	0.388756	0.474302	0.358152	0.488984	0.424968	0.487985	0.54689	0.638913	0.738452	0.716101	0.729292	0.666277	0.850233	0.3091	0.339933	0.462024	0.453803	0.550035	0.359879	0.526666	0.441417	0.567423	0.606737	0.643502	0.759528	0.715797	0.746943	0.665606	0.862561	0.298882	0.32613	0.484785	0.555471	0.704105	0.314488	0.597874	0.600695	0.73234	0.582941	0.614498	0.750014	0.689275	0.727512	0.624713	0.827888	0.0009131
595	0.30359	0.341154	0.391102	0.388571	0.474157	0.357946	0.48877	0.424782	0.487739	0.546698	0.638696	0.738249	0.715845	0.729043	0.666041	0.850065	0.30896	0.339805	0.461838	0.45364	0.54989	0.359729	0.526395	0.441236	0.567261	0.60654	0.643293	0.759364	0.715464	0.74663	0.665318	0.862407	0.298722	0.325925	0.484583	0.555201	0.703968	0.314226	0.597531	0.600537	0.732016	0.582	0.614083	0.749635	0.688942	0.727219	0.62439	0.827614	0.000904097
596	0.303407	0.340995	0.390945	0.388428	0.473996	0.357757	0.488547	0.424545	0.487536	0.546465	0.638505	0.738073	0.715635	0.728846	0.665789	0.849935	0.308828	0.33964	0.461629	0.453439	0.549762	0.359496	0.526123	0.440954	0.567103	0.606334	0.643029	0.759143	0.715234	0.746382	0.665041	0.86217	0.298591	0.325725	0.484355	0.554962	0.703804	0.31399	0.597189	0.600352	0.731656	0.580801	0.613879	0.749317	0.688565	0.726887	0.624052	0.827309	0.000894046
597	0.303277	0.340819	0.390787	0.38828	0.473864	0.357588	0.488262	0.424304	0.487328	0.546236	0.638316	0.737849	0.715431	0.728661	0.665607	0.84967	0.308639	0.339471	0.461528	0.453281	0.549629	0.359244	0.525906	0.440732	0.566913	0.606084	0.642783	0.758968	0.715005	0.746205	0.664763	0.862041	0.298446	0.325495	0.484147	0.55474	0.703601	0.313799	0.596844	0.600137	0.731379	0.579858	0.613659	0.749032	0.688235	0.726667	0.623806	0.82702	0.000892042
598	0.303122	0.340661	0.390643	0.388131	0.473694	0.357437	0.488056	0.424104	0.487153	0.546026	0.638139	0.737657	0.7152	0.72842	0.665319	0.849477	0.308525	0.339301	0.461427	0.453101	0.549445	0.35905	0.52557	0.440484	0.566725	0.605887	0.642585	0.758784	0.714757	0.745958	0.664552	0.861831	0.298229	0.3253	0.483937	0.554553	0.703359	0.31355	0.596519	0.599938	0.731131	0.578881	0.613416	0.748792	0.687878	0.726418	0.623463	0.82675	0.000859153
599	0.303007	0.340468	0.39049	0.387947	0.473558	0.35721	0.487872	0.423915	0.486961	0.545893	0.637926	0.737392	0.715012	0.728234	0.665102	0.849297	0.308374	0.339128	0.461255	0.452964	0.549293	0.358866	0.525311	0.440294	0.56651	0.605665	0.642366	0.758595	0.714492	0.745714	0.664281	0.861676	0.298099	0.325084	0.483711	0.554303	0.703203	0.313344	0.596164	0.599749	0.730843	0.577886	0.613111	0.74851	0.687552	0.726118	0.62323	0.826439	0.000840704
600	0.302889	0.340275	0.390345	0.387776	0.473414	0.357055	0.487682	0.423723	0.4868	0.545681	0.637755	0.737227	0.714798	0.728046	0.664873	0.849158	0.30826	0.338956	0.461105	0.452815	0.549128	0.358658	0.525106	0.440001	0.566305	0.605422	0.642109	0.758479	0.714259	0.745497	0.664026	0.861546	0.297966	0.324852	0.4835	0.554153	0.703034	0.313075	0.595895	0.599459	0.730639	0.576735	0.612891	0.748196	0.687253	0.72583	0.622986	0.826208	0.000824527
601	0.302718	0.340072	0.390183	0.387639	0.473267	0.356834	0.487449	0.423489	0.486624	0.545438	0.637528	0.737024	0.714581	0.727771	0.664693	0.848986	0.308139	0.338825	0.460936	0.452633	0.549018	0.358372	0.524833	0.43977	0.566112	0.605159	0.641873	0.758282	0.71399	0.745276	0.663837	0.861397	0.297875	0.32472	0.483318	0.55395	0.702855	0.31274	0.595525	0.599256	0.730376	0.575991	0.612656	0.747902	0.68697	0.725591	0.622655	0.8259	0.000819662
602	0.302613	0.339929	0.389991	0.387502	0.473118	0.356674	0.487142	0.423304	0.486447	0.54523	0.637322	0.736764	0.714335	0.727604	0.664499	0.848776	0.308006	0.338641	0.460769	0.452497	0.548842	0.358124	0.524554	0.43951	0.565931	0.604869	0.641617	0.758087	0.713681	0.745078	0.663635	0.861233	0.29771	0.324529	0.483123	0.553673	0.702662	0.312367	0.595209	0.59907	0.73	0.575023	0.612413	0.747555	0.686652	0.725315	0.622185	0.825523	0.000798659
603	0.302496	0.339757	0.389844	0.387308	0.472972	0.356521	0.486877	0.423139	0.486185	0.54504	0.637102	0.736565	0.71414	0.727374	0.664188	0.848596	0.307874	0.338459	0.460622	0.452335	0.548705	0.357939	0.524349	0.439312	0.565691	0.60468	0.641311	0.757864	0.713445	0.744848	0.663425	0.861019	0.29756	0.324359	0.482914	0.553377	0.702483	0.312074	0.594831	0.598912	0.729648	0.574226	0.612137	0.747192	0.686333	0.725044	0.621895	0.825282	0.000790367
604	0.302302	0.339629	0.389676	0.387141	0.472822	0.356331	0.486592	0.42292	0.485982	0.54484	0.636891	0.736355	0.713948	0.727143	0.663916	0.848463	0.307757	0.338267	0.46044	0.452118	0.54851	0.357721	0.52406	0.439127	0.565525	0.604452	0.641057	0.757707	0.71324	0.744646	0.663145	0.860832	0.297388	0.324117	0.482678	0.553189	0.702277	0.31188	0.594514	0.598696	0.72934	0.573214	0.611876	0.746781	0.685882	0.724768	0.621609	0.825003	0.00077976
605	0.302181	0.339481	0.389466	0.387009	0.472706	0.35618	0.4863	0.422685	0.485734	0.544586	0.636618	0.736166	0.713718	0.726904	0.66373	0.848271	0.307623	0.338094	0.460294	0.451954	0.548348	0.357556	0.523783	0.438891	0.565353	0.604233	0.640824	0.757464	0.713042	0.744443	0.66288	0.86064	0.29722	0.323877	0.482493	0.552904	0.702107	0.311606	0.594125	0.598449	0.729007	0.572436	0.611626	0.746517	0.685666	0.724468	0.621302	0.824626	0.000764472
606	0.302005	0.339346	0.389307	0.386843	0.47251	0.355996	0.486043	0.422517	0.485514	0.544339	0.636376	0.736019	0.713536	0.726717	0.663499	0.848114	0.307452	0.33792	0.46016	0.451787	0.548179	0.35732	0.523517	0.438602	0.565116	0.603974	0.640584	0.757284	0.71285	0.744258	0.662618	0.860473	0.297089	0.323741	0.482299	0.552688	0.701868	0.311409	0.593743	0.598222	0.728658	0.571402	0.611333	0.746181	0.685407	0.724217	0.621031	0.824393	0.000745571
607	0.301883	0.339184	0.389112	0.38671	0.472357	0.355777	0.48581	0.422312	0.485322	0.544105	0.636134	0.735813	0.713283	0.726532	0.663284	0.847972	0.307325	0.337703	0.460019	0.451631	0.547971	0.357094	0.523361	0.43841	0.564917	0.603732	0.640304	0.757123	0.712628	0.744028	0.662372	0.860319	0.29698	0.323535	0.482121	0.552522	0.701667	0.311181	0.593452	0.598056	0.7284	0.570416	0.611047	0.745973	0.685012	0.723888	0.620731	0.824084	0.000736188
608	0.301749	0.338999	0.388956	0.386557	0.472192	0.355534	0.485564	0.422079	0.485112	0.543897	0.635897	0.73564	0.71306	0.726362	0.66309	0.847837	0.307206	0.337542	0.459832	0.451514	0.547816	0.356927	0.523101	0.438213	0.564738	0.603416	0.640088	0.756918	0.71235	0.743861	0.662117	0.860141	0.29679	0.32335	0.481938	0.552278	0.701464	0.310938	0.59308	0.597843	0.728142	0.569745	0.610734	0.745615	0.684684	0.723581	0.620367	0.823826	0.000724517
609	0.301624	0.338837	0.388786	0.386435	0.472046	0.355347	0.48534	0.421873	0.484923	0.543663	0.635718	0.735458	0.712836	0.726138	0.662855	0.847647	0.307089	0.337356	0.459674	0.451351	0.547655	0.356761	0.522865	0.437857	0.564522	0.60311	0.639837	0.756698	0.712113	0.743666	0.661856	0.85995	0.296644	0.323109	0.481747	0.551937	0.701294	0.310675	0.592674	0.597574	0.72791	0.56855	0.610412	0.745359	0.684384	0.723258	0.619996	0.823581	0.00071397
610	0.30148	0.338665	0.388679	0.386293	0.471886	0.35518	0.485028	0.421646	0.48476	0.543466	0.635561	0.735267	0.712622	0.725913	0.662608	0.847485	0.307001	0.337216	0.459537	0.451223	0.547537	0.356495	0.5226	0.437632	0.564323	0.602876	0.639543	0.756521	0.711862	0.743437	0.661574	0.859695	0.296502	0.322944	0.481477	0.551687	0.701145	0.31047	0.59237	0.597292	0.72757	0.567733	0.610134	0.745105	0.684047	0.722934	0.619588	0.823295	0.000707781
611	0.301321	0.33851	0.388542	0.38608	0.471748	0.354995	0.484803	0.421372	0.484551	0.543245	0.635353	0.73509	0.712367	0.725696	0.662369	0.847354	0.306875	0.337041	0.459351	0.451066	0.547369	0.356286	0.522282	0.437363	0.564123	0.602672	0.639327	0.756311	0.711608	0.743235	0.661326	0.859547	0.296316	0.322735	0.48119	0.551458	0.700954	0.310253	0.592031	0.597094	0.727292	0.567034	0.609901	0.744715	0.68376	0.722673	0.619161	0.822968	0.000703296
612	0.301182	0.338366	0.388405	0.385945	0.471596	0.354848	0.484522	0.421235	0.484381	0.543061	0.635141	0.734896	0.712127	0.725486	0.66206	0.847194	0.306764	0.336894	0.459241	0.450938	0.547175	0.356065	0.522045	0.43712	0.563923	0.602472	0.639149	0.756101	0.7114	0.743017	0.66103	0.859359	0.296161	0.322558	0.480957	0.551225	0.700746	0.309997	0.591815	0.59684	0.726961	0.566258	0.60954	0.744414	0.683391	0.722364	0.618876	0.822627	0.000693141
613	0.301008	0.338207	0.388279	0.385796	0.471452	0.35467	0.484274	0.421058	0.484187	0.542864	0.634935	0.73472	0.711933	0.725223	0.661865	0.847014	0.306612	0.336703	0.459057	0.450769	0.546988	0.355851	0.521836	0.436841	0.563737	0.602281	0.638864	0.755931	0.711127	0.742737	0.660861	0.85914	0.295986	0.32233	0.480749	0.550978	0.700567	0.309778	0.591433	0.596645	0.726676	0.565373	0.609212	0.744094	0.683144	0.722053	0.618672	0.822333	0.000689699
614	0.300807	0.338021	0.388111	0.385635	0.47129	0.354483	0.483978	0.420809	0.483946	0.542668	0.634668	0.734536	0.711715	0.724968	0.661713	0.846822	0.306426	0.336522	0.45892	0.450653	0.54687	0.355703	0.521671	0.436662	0.563498	0.602063	0.638691	0.755766	0.7109	0.742571	0.660563	0.859002	0.295839	0.322156	0.480502	0.550672	0.700368	0.309554	0.591154	0.596429	0.72641	0.563938	0.608947	0.743831	0.682848	0.721815	0.618262	0.822027	0.000673159
615	0.300625	0.337858	0.387933	0.385492	0.471147	0.354303	0.483736	0.420617	0.483761	0.542471	0.634443	0.73433	0.711499	0.724716	0.661468	0.846599	0.30631	0.336344	0.458787	0.450537	0.546704	0.355494	0.521464	0.436466	0.56333	0.601875	0.638444	0.755572	0.710593	0.742328	0.660269	0.858825	0.295681	0.322005	0.480272	0.550392	0.700197	0.309348	0.590853	0.596241	0.726094	0.563172	0.608663	0.743601	0.682554	0.721591	0.617876	0.82172	0.000656451
616	0.300497	0.337693	0.38771	0.385367	0.470978	0.35415	0.483503	0.420378	0.483514	0.542283	0.634213	0.734144	0.711287	0.72453	0.6612	0.84638	0.306159	0.336175	0.458617	0.450384	0.546563	0.355296	0.521103	0.436281	0.563168	0.601649	0.638188	0.75541	0.710297	0.742052	0.66003	0.85868	0.295545	0.321795	0.48005	0.550126	0.69997	0.309096	0.590458	0.596029	0.72578	0.562218	0.608399	0.743224	0.68227	0.721227	0.617591	0.821482	0.000653234
617	0.300315	0.337532	0.387541	0.385192	0.470845	0.353945	0.483292	0.420184	0.483341	0.542104	0.634036	0.733989	0.711042	0.724328	0.660996	0.846187	0.305995	0.336004	0.458436	0.450236	0.546434	0.355062	0.520839	0.436018	0.562936	0.601466	0.637903	0.755238	0.710042	0.741864	0.659649	0.858525	0.295388	0.32162	0.479827	0.549831	0.699757	0.30884	0.590164	0.595787	0.725454	0.561389	0.608078	0.742857	0.681913	0.72088	0.617294	0.821238	0.000644796
618	0.300175	0.337387	0.387398	0.385035	0.470692	0.353783	0.483053	0.419971	0.483164	0.541914	0.633791	0.733795	0.710793	0.724098	0.66077	0.845951	0.305856	0.335828	0.458248	0.450029	0.54624	0.354894	0.520652	0.435756	0.562784	0.601208	0.637663	0.75498	0.709792	0.741535	0.65935	0.85834	0.295244	0.321438	0.479674	0.549615	0.699563	0.308587	0.589859	0.595564	0.725073	0.56012	0.607809	0.742604	0.681603	0.720555	0.616959	0.820873	0.00064355
619	0.30005	0.337205	0.387294	0.384898	0.470534	0.353615	0.482823	0.419771	0.482984	0.541683	0.633618	0.733585	0.710594	0.723905	0.660536	0.845734	0.305724	0.33563	0.458098	0.449874	0.546109	0.354652	0.520379	0.435551	0.562609	0.600965	0.637394	0.754765	0.709546	0.741322	0.659089	0.858161	0.295128	0.321246	0.479497	0.549364	0.699306	0.308313	0.589596	0.595405	0.724728	0.559281	0.607512	0.742269	0.681295	0.720294	0.616639	0.82054	0.000639815
620	0.299933	0.337012	0.387143	0.384759	0.470381	0.353438	0.482603	0.419596	0.482836	0.54147	0.63338	0.733394	0.710411	0.723671	0.660263	0.845571	0.305577	0.3355	0.457877	0.449764	0.545928	0.354498	0.520131	0.435327	0.562361	0.600716	0.637124	0.754595	0.709305	0.741106	0.658815	0.858014	0.295002	0.321097	0.479316	0.549165	0.699108	0.308132	0.589236	0.595243	0.724473	0.558254	0.607213	0.742025	0.680931	0.719941	0.616305	0.820309	0.000622694
621	0.299838	0.336847	0.387	0.384612	0.470222	0.353261	0.482381	0.419374	0.482625	0.541221	0.633195	0.733189	0.710135	0.723482	0.660001	0.845387	0.305463	0.335349	0.457719	0.449609	0.545731	0.354254	0.519928	0.435123	0.56213	0.600458	0.636955	0.754402	0.709033	0.740834	0.658576	0.857853	0.294803	0.320884	0.479129	0.548972	0.698903	0.307916	0.588948	0.595089	0.724116	0.55741	0.606992	0.741722	0.680553	0.719704	0.616048	0.820027	0.000610441
622	0.299708	0.336663	0.386821	0.384482	0.470068	0.353058	0.482157	0.419116	0.482438	0.541051	0.632955	0.732933	0.709975	0.723261	0.659799	0.845202	0.305361	0.335241	0.457521	0.449447	0.545615	0.35398	0.519606	0.434905	0.561934	0.600297	0.636728	0.754223	0.708782	0.7406	0.658375	0.857666	0.294637	0.32067	0.478919	0.54874	0.698742	0.307667	0.588587	0.594811	0.723836	0.556366	0.606714	0.741484	0.680269	0.71942	0.615734	0.819727	0.000595376
623	0.299597	0.336513	0.386653	0.384326	0.469934	0.352837	0.481928	0.418899	0.48219	0.540804	0.632766	0.732715	0.709677	0.723029	0.659482	0.845091	0.305207	0.335121	0.457365	0.449261	0.545491	0.35374	0.519397	0.434623	0.561655	0.600144	0.636532	0.754027	0.708577	0.740388	0.658199	0.857533	0.294454	0.3205	0.478706	0.548548	0.698553	0.307454	0.588255	0.594587	0.723533	0.555452	0.6064	0.741246	0.679935	0.719187	0.615355	0.819498	0.000591063
624	0.299481	0.336333	0.386511	0.38415	0.469784	0.35269	0.481712	0.41871	0.482023	0.540596	0.63256	0.732534	0.709473	0.722809	0.659271	0.844912	0.305057	0.334972	0.457164	0.449077	0.545342	0.353551	0.519192	0.434364	0.561506	0.599846	0.636341	0.753807	0.708298	0.740213	0.657921	0.857314	0.294292	0.320264	0.478487	0.548254	0.698356	0.307267	0.587901	0.594431	0.723193	0.55453	0.606126	0.741018	0.679679	0.718884	0.614978	0.819253	0.000587547
625	0.299307	0.336165	0.386382	0.384007	0.469656	0.352559	0.481461	0.418538	0.48182	0.540363	0.632281	0.732364	0.709319	0.722581	0.659059	0.844746	0.304914	0.33476	0.457037	0.448925	0.545189	0.353364	0.518967	0.434179	0.561306	0.599651	0.636123	0.75359	0.708079	0.739947	0.657627	0.857132	0.294118	0.320068	0.478245	0.547998	0.698188	0.306991	0.587569	0.59424	0.722867	0.553493	0.605887	0.740795	0.679361	0.718644	0.614683	0.818883	0.00058067
626	0.299098	0.336013	0.386241	0.383855	0.469484	0.352399	0.481198	0.418386	0.481596	0.540106	0.632078	0.732158	0.709094	0.722408	0.658889	0.844597	0.304746	0.334588	0.456851	0.448722	0.54505	0.353186	0.518683	0.433924	0.561111	0.599439	0.635932	0.753468	0.707851	0.73978	0.657307	0.856944	0.293931	0.319863	0.478062	0.547735	0.697912	0.306772	0.587288	0.593978	0.722562	0.552672	0.60561	0.740508	0.679139	0.718436	0.614311	0.818649	0.000560356
627	0.298964	0.335879	0.386089	0.383708	0.469324	0.352177	0.480962	0.418201	0.481392	0.539849	0.631869	0.732002	0.70892	0.722188	0.658574	0.844444	0.30461	0.334447	0.456704	0.448567	0.544867	0.352993	0.518444	0.433617	0.560916	0.599221	0.635714	0.753265	0.707575	0.739533	0.657051	0.856773	0.293779	0.31964	0.477896	0.547448	0.697733	0.306472	0.586958	0.59369	0.722241	0.551469	0.605286	0.740183	0.678816	0.718137	0.614024	0.81835	0.000551373
628	0.298829	0.335704	0.38593	0.383563	0.469167	0.351981	0.480724	0.417986	0.481236	0.539642	0.631707	0.731844	0.708702	0.721975	0.658365	0.844268	0.304469	0.334264	0.456569	0.448401	0.544716	0.352784	0.518263	0.433415	0.560697	0.598983	0.63557	0.75304	0.707322	0.739327	0.656745	0.856586	0.293627	0.319467	0.477687	0.547227	0.697545	0.306215	0.586602	0.593459	0.721901	0.550407	0.605009	0.739882	0.678442	0.71783	0.613659	0.818102	0.000542668
629	0.298701	0.335582	0.385763	0.383405	0.468989	0.351814	0.480477	0.417828	0.481027	0.539457	0.631475	0.731632	0.7085	0.721735	0.658158	0.844155	0.304354	0.334131	0.456397	0.448254	0.544589	0.352533	0.517981	0.433248	0.56045	0.598691	0.635364	0.752846	0.706989	0.739136	0.656505	0.856438	0.293472	0.319323	0.477479	0.546999	0.697328	0.305928	0.58634	0.593304	0.721568	0.549007	0.604709	0.739529	0.678005	0.717517	0.613386	0.817821	0.000536346
630	0.298539	0.335442	0.385621	0.383259	0.468863	0.351709	0.480276	0.41763	0.480768	0.539256	0.631224	0.7315	0.708254	0.721517	0.657904	0.843959	0.304232	0.333897	0.456246	0.448054	0.54441	0.352367	0.517775	0.433049	0.56023	0.59845	0.63515	0.752646	0.706753	0.73889	0.656274	0.856217	0.293335	0.319117	0.477251	0.54667	0.697159	0.305629	0.585989	0.593118	0.721288	0.547954	0.604455	0.739227	0.677676	0.717135	0.613003	0.817546	0.000527782
631	0.298401	0.335271	0.385423	0.383094	0.468719	0.351561	0.480073	0.417444	0.480563	0.539056	0.631032	0.731367	0.70798	0.721288	0.657751	0.843807	0.30409	0.333744	0.45609	0.447922	0.544252	0.35221	0.517553	0.432799	0.560043	0.598221	0.634997	0.752444	0.706536	0.738597	0.656029	0.856066	0.293185	0.31894	0.47706	0.546388	0.696992	0.305418	0.585681	0.592935	0.720876	0.546875	0.60424	0.738951	0.677407	0.716807	0.612619	0.817227	0.000522184
632	0.298254	0.335093	0.385275	0.382999	0.468564	0.351383	0.479799	0.417253	0.480356	0.538889	0.630871	0.731155	0.70771	0.721057	0.657446	0.843668	0.303978	0.333602	0.455935	0.447775	0.544117	0.351958	0.517297	0.432567	0.559829	0.597961	0.6348	0.752288	0.706328	0.738352	0.655707	0.855889	0.293052	0.318732	0.476901	0.546116	0.696769	0.305239	0.585288	0.592736	0.720518	0.545889	0.604038	0.738663	0.67716	0.716501	0.612254	0.816883	0.000518974
633	0.298139	0.334916	0.38514	0.382829	0.468388	0.351217	0.479544	0.417083	0.480211	0.538699	0.630614	0.730942	0.707487	0.72087	0.657246	0.843472	0.303794	0.333479	0.455801	0.447623	0.543921	0.351769	0.516965	0.432363	0.559653	0.597751	0.634568	0.752102	0.706085	0.738165	0.655458	0.855703	0.292932	0.318594	0.476676	0.545876	0.696583	0.305036	0.585015	0.592496	0.720264	0.544728	0.6038	0.738395	0.676903	0.716283	0.611919	0.816579	0.000515533
634	0.297968	0.33474	0.384978	0.382694	0.468264	0.350994	0.479319	0.416865	0.480016	0.53849	0.630378	0.730741	0.707269	0.720586	0.657099	0.843278	0.303628	0.333284	0.45562	0.447456	0.543739	0.351571	0.516749	0.432116	0.559476	0.597553	0.634339	0.751932	0.705837	0.737909	0.655183	0.85551	0.292796	0.318404	0.476461	0.545591	0.696345	0.304816	0.584728	0.592319	0.71987	0.543887	0.603505	0.738081	0.676676	0.716052	0.611624	0.816271	0.000504505
635	0.297824	0.334667	0.384798	0.382542	0.468125	0.350861	0.479024	0.41674	0.479859	0.538226	0.630147	0.730549	0.707095	0.720383	0.656854	0.843077	0.303512	0.333096	0.455454	0.447271	0.543587	0.351357	0.51648	0.431881	0.559329	0.597321	0.634123	0.751717	0.705569	0.73769	0.654882	0.855319	0.292643	0.318208	0.476257	0.545388	0.69615	0.304642	0.584387	0.592107	0.719571	0.542765	0.603176	0.737773	0.676328	0.715725	0.611237	0.816046	0.000493414
636	0.297665	0.334543	0.384632	0.382412	0.467963	0.350701	0.478786	0.41656	0.479651	0.538002	0.629928	0.730347	0.706846	0.720143	0.656641	0.842897	0.303397	0.332938	0.455313	0.447058	0.543447	0.351142	0.516218	0.431669	0.559108	0.597074	0.633908	0.751537	0.705288	0.737472	0.654663	0.855117	0.292483	0.318046	0.476105	0.545167	0.695921	0.304427	0.584095	0.591883	0.719196	0.541511	0.602968	0.737529	0.675883	0.715455	0.610994	0.815652	0.000492614
637	0.297515	0.334395	0.384501	0.38228	0.467819	0.35054	0.478538	0.416315	0.479394	0.537768	0.629698	0.730159	0.706584	0.719931	0.656414	0.842715	0.303289	0.332823	0.45515	0.446893	0.54328	0.350963	0.515915	0.431453	0.558912	0.596807	0.633637	0.751368	0.705068	0.737125	0.654436	0.854907	0.292373	0.317872	0.475941	0.544832	0.695613	0.304134	0.58382	0.591689	0.718803	0.540394	0.602642	0.737204	0.675611	0.71516	0.610645	0.815394	0.000486511
638	0.297366	0.334249	0.384344	0.382127	0.467661	0.350397	0.478326	0.416067	0.479195	0.537589	0.629454	0.72996	0.706331	0.719717	0.656185	0.842554	0.303164	0.332705	0.454989	0.446719	0.543101	0.35073	0.515638	0.431261	0.558737	0.596552	0.63338	0.751198	0.704832	0.736887	0.654119	0.854739	0.292172	0.317719	0.475779	0.544591	0.695394	0.303937	0.583489	0.591452	0.718376	0.539437	0.602377	0.736881	0.675303	0.714835	0.610305	0.815129	0.000484924
639	0.297251	0.334114	0.384178	0.38199	0.4675	0.350212	0.478027	0.415874	0.478992	0.537397	0.629201	0.729778	0.70611	0.719444	0.655998	0.842367	0.303005	0.332588	0.454861	0.44657	0.542992	0.350544	0.515413	0.431082	0.558626	0.596321	0.633166	0.751017	0.704624	0.736704	0.653899	0.854557	0.292006	0.317561	0.475539	0.544325	0.695183	0.303697	0.583206	0.591255	0.717981	0.538192	0.602166	0.736515	0.674952	0.714544	0.609971	0.814812	0.000467908
640	0.297134	0.333966	0.384026	0.381839	0.46736	0.350047	0.477813	0.415614	0.478832	0.537221	0.628946	0.729587	0.705897	0.719199	0.655744	0.842124	0.302895	0.332401	0.45468	0.446434	0.542852	0.350329	0.515185	0.430858	0.558396	0.596077	0.632983	0.750842	0.704373	0.736546	0.65361	0.854375	0.291854	0.3174	0.475348	0.544171	0.694972	0.303441	0.583003	0.591042	0.71756	0.537168	0.601909	0.736218	0.674719	0.714235	0.6096	0.814552	0.0004661
641	0.297023	0.333809	0.383907	0.381659	0.467195	0.349891	0.477578	0.415333	0.478623	0.537039	0.62869	0.729406	0.705748	0.719002	0.655493	0.841917	0.302745	0.332225	0.454511	0.446312	0.542713	0.350185	0.5149	0.430674	0.558185	0.595903	0.632776	0.750631	0.704133	0.736374	0.65337	0.854218	0.291672	0.317172	0.475136	0.54394	0.694737	0.303247	0.582663	0.590718	0.717231	0.536248	0.601546	0.735968	0.674444	0.713917	0.609223	0.814307	0.000463393
642	0.296886	0.333671	0.383751	0.381537	0.467023	0.349743	0.47737	0.415194	0.478419	0.536793	0.628478	0.729203	0.70552	0.718781	0.655241	0.841766	0.302609	0.332069	0.454328	0.44612	0.542581	0.349899	0.514663	0.430398	0.557967	0.595668	0.632528	0.750445	0.703873	0.736158	0.653086	0.853975	0.291558	0.317014	0.474895	0.543716	0.694551	0.303015	0.58234	0.590502	0.716852	0.53522	0.601184	0.735709	0.674055	0.713621	0.608873	0.813981	0.000458528
643	0.296745	0.333533	0.38362	0.381405	0.466822	0.349567	0.477155	0.415012	0.478234	0.536601	0.628293	0.729038	0.705257	0.718584	0.655064	0.841627	0.302505	0.331902	0.454147	0.44595	0.542428	0.349729	0.514413	0.430154	0.557797	0.595475	0.632319	0.75028	0.703549	0.735946	0.652855	0.853748	0.291397	0.316833	0.474676	0.543453	0.694387	0.302826	0.582012	0.590287	0.716565	0.53425	0.600902	0.735409	0.673731	0.713385	0.608599	0.813693	0.000454633
644	0.296616	0.333391	0.383444	0.381269	0.466655	0.349367	0.476943	0.414791	0.478074	0.536405	0.628084	0.728882	0.705094	0.718377	0.654836	0.841457	0.302357	0.331742	0.453981	0.445767	0.542291	0.349491	0.514136	0.429896	0.55763	0.595197	0.63207	0.750085	0.703279	0.735675	0.652569	0.853589	0.291222	0.31669	0.474491	0.543182	0.694125	0.30254	0.581715	0.59005	0.716235	0.533233	0.600613	0.735204	0.673515	0.713134	0.608188	0.813395	0.000444149
645	0.296521	0.333241	0.383303	0.381116	0.466487	0.349173	0.476671	0.414583	0.477876	0.53622	0.627839	0.728719	0.704828	0.718125	0.654528	0.841244	0.302237	0.331602	0.453821	0.445622	0.542162	0.349309	0.513848	0.429626	0.557403	0.594976	0.631848	0.749874	0.703045	0.735465	0.652265	0.853393	0.291076	0.316511	0.474285	0.54294	0.693914	0.302323	0.58135	0.589885	0.715948	0.532156	0.60029	0.734964	0.673068	0.71286	0.607915	0.813097	0.000443873
646	0.296414	0.333099	0.383149	0.38097	0.466361	0.348975	0.476476	0.414342	0.477631	0.536013	0.627669	0.728553	0.704645	0.717855	0.654312	0.841056	0.302079	0.331488	0.453682	0.445443	0.542021	0.349106	0.513564	0.429364	0.557211	0.594714	0.631649	0.749673	0.702762	0.735286	0.652011	0.853206	0.290966	0.316363	0.474099	0.542603	0.693647	0.302082	0.580992	0.589671	0.715569	0.531129	0.600023	0.734687	0.672716	0.712562	0.607493	0.812795	0.000440265
647	0.296255	0.332949	0.382996	0.380797	0.466243	0.348835	0.476213	0.414167	0.477403	0.535785	0.627488	0.728352	0.704438	0.717646	0.654085	0.840897	0.301911	0.331312	0.453528	0.445304	0.541841	0.348853	0.513333	0.429115	0.557062	0.59445	0.63136	0.749501	0.702545	0.735074	0.651797	0.853024	0.290794	0.316148	0.473913	0.542266	0.693383	0.301762	0.58069	0.589486	0.715067	0.529998	0.599754	0.73435	0.672353	0.712305	0.607211	0.812525	0.000437906
648	0.296115	0.332772	0.382858	0.380703	0.466081	0.348667	0.476013	0.413936	0.477224	0.535634	0.627288	0.728122	0.704194	0.717457	0.653827	0.840757	0.301776	0.331214	0.453408	0.445189	0.541707	0.348589	0.51303	0.428839	0.556905	0.594257	0.631142	0.749309	0.702268	0.734798	0.651557	0.852842	0.290646	0.31599	0.473697	0.542053	0.693165	0.301576	0.580418	0.589273	0.714728	0.529139	0.599538	0.733991	0.672068	0.712035	0.606969	0.812223	0.000437721
649	0.295987	0.332616	0.382683	0.380554	0.465894	0.348499	0.475777	0.413779	0.477007	0.535479	0.627099	0.727854	0.703947	0.717246	0.653633	0.840563	0.301653	0.331076	0.453253	0.445055	0.541538	0.348455	0.512759	0.428615	0.5567	0.594093	0.630984	0.749073	0.701942	0.734605	0.651393	0.852649	0.290535	0.31579	0.473493	0.541757	0.692941	0.301399	0.580181	0.589068	0.714377	0.527863	0.59921	0.733642	0.671669	0.711729	0.606741	0.811998	0.000423081
650	0.295859	0.332469	0.382511	0.380406	0.465721	0.348326	0.475605	0.413537	0.476829	0.535281	0.626923	0.727622	0.703748	0.71705	0.653403	0.840422	0.301506	0.330921	0.453075	0.444919	0.541349	0.348186	0.512447	0.428404	0.556497	0.59389	0.630757	0.748804	0.70174	0.734378	0.65113	0.852532	0.290404	0.315609	0.473295	0.541507	0.692708	0.301219	0.579777	0.588873	0.714011	0.526818	0.598938	0.733333	0.6714	0.711475	0.606389	0.811781	0.0004111
651	0.295744	0.332318	0.382353	0.380276	0.465614	0.348167	0.475397	0.413329	0.476569	0.535089	0.626688	0.72748	0.703571	0.716823	0.653168	0.840269	0.301377	0.330756	0.452935	0.444758	0.541184	0.347971	0.5122	0.428173	0.556333	0.59371	0.630585	0.748574	0.701464	0.734119	0.650904	0.852349	0.290245	0.315415	0.473071	0.541319	0.692496	0.300947	0.579464	0.588634	0.713567	0.525754	0.598667	0.73293	0.671109	0.711172	0.606021	0.81145	0.000400197
652	0.295567	0.332143	0.382252	0.380152	0.46551	0.347915	0.475129	0.413159	0.476371	0.534906	0.626503	0.727332	0.70335	0.716552	0.652929	0.840121	0.301224	0.330603	0.452796	0.444609	0.540996	0.347783	0.511983	0.427942	0.556148	0.593502	0.630286	0.748357	0.701229	0.733856	0.650642	0.852138	0.290088	0.315252	0.472898	0.541005	0.692255	0.300697	0.579093	0.588453	0.713212	0.524519	0.598362	0.732595	0.670824	0.710885	0.605747	0.811111	0.000398504
653	0.295385	0.332006	0.382086	0.380029	0.465319	0.347751	0.474955	0.413011	0.476174	0.534659	0.626316	0.727114	0.703104	0.71636	0.652673	0.839943	0.301122	0.330414	0.452659	0.444471	0.540848	0.347591	0.511689	0.427718	0.555995	0.593231	0.630046	0.748188	0.700994	0.733666	0.650462	0.851943	0.289936	0.315041	0.472723	0.540824	0.692038	0.300408	0.578725	0.588246	0.712778	0.523314	0.598033	0.732253	0.670533	0.710576	0.6055	0.810811	0.000393543
654	0.295226	0.331873	0.381915	0.379897	0.465169	0.347595	0.474734	0.41285	0.475952	0.534456	0.626115	0.726951	0.702914	0.716174	0.652467	0.839735	0.30097	0.330267	0.452486	0.444279	0.540689	0.347411	0.511415	0.427539	0.555798	0.593086	0.629793	0.74796	0.700791	0.733427	0.650264	0.851748	0.289803	0.314895	0.47249	0.540534	0.691814	0.300213	0.578426	0.587992	0.712364	0.522506	0.597813	0.731889	0.670206	0.710241	0.605191	0.810583	0.000391024
655	0.295113	0.331737	0.381772	0.379763	0.465036	0.347419	0.474535	0.412673	0.475777	0.534264	0.625934	0.726779	0.702692	0.715998	0.652208	0.839585	0.300827	0.330099	0.45231	0.444085	0.540517	0.347189	0.511126	0.427303	0.555606	0.592835	0.629573	0.747804	0.700503	0.733192	0.649885	0.851572	0.289688	0.314747	0.47233	0.540241	0.691555	0.299975	0.578109	0.587759	0.71202	0.52135	0.597522	0.7315	0.669876	0.709884	0.604942	0.810401	0.000390905
656	0.294962	0.331591	0.381622	0.379616	0.464894	0.347256	0.474265	0.412446	0.4756	0.534051	0.62568	0.726589	0.702438	0.715785	0.651953	0.839422	0.300721	0.32993	0.452126	0.443942	0.540367	0.346984	0.510974	0.427127	0.555452	0.59267	0.629366	0.747545	0.700253	0.732949	0.649647	0.851416	0.289544	0.314576	0.472117	0.539897	0.691329	0.299795	0.577822	0.587552	0.711666	0.519979	0.597218	0.731203	0.669583	0.709453	0.604527	0.810112	0.00038912
657	0.2948	0.331454	0.381444	0.379468	0.464752	0.347125	0.473969	0.412255	0.475394	0.533849	0.625546	0.726388	0.702218	0.715632	0.651737	0.83924	0.300611	0.329749	0.451968	0.443759	0.540197	0.346762	0.51076	0.426819	0.555257	0.592434	0.629114	0.747368	0.700019	0.73272	0.649413	0.851251	0.289414	0.314438	0.471914	0.539638	0.69108	0.299514	0.577506	0.587318	0.711344	0.518938	0.596915	0.730919	0.669289	0.709145	0.604196	0.809842	0.000386514
658	0.294639	0.331286	0.381293	0.379352	0.464588	0.346955	0.473724	0.41204	0.475208	0.533681	0.625353	0.726228	0.701982	0.715434	0.65154	0.839106	0.300472	0.329557	0.4518	0.443627	0.540035	0.346558	0.510532	0.426572	0.55506	0.592193	0.628918	0.74716	0.699757	0.732539	0.649173	0.851061	0.289302	0.314237	0.471731	0.539403	0.690838	0.299307	0.577169	0.587097	0.711004	0.517943	0.596622	0.730677	0.669025	0.708941	0.603867	0.809509	0.000380645
659	0.294502	0.33118	0.381145	0.379244	0.464461	0.346744	0.473532	0.411879	0.474967	0.533504	0.625163	0.726036	0.701762	0.715205	0.651376	0.83893	0.300318	0.329425	0.451583	0.44348	0.539894	0.346389	0.51029	0.426336	0.554882	0.592003	0.628668	0.746898	0.699479	0.732332	0.648916	0.85087	0.289185	0.314019	0.471543	0.53916	0.690543	0.299051	0.576897	0.586887	0.710552	0.516796	0.596329	0.730428	0.66876	0.708664	0.603536	0.809173	0.000373727
660	0.294421	0.331021	0.38098	0.379127	0.464307	0.346595	0.473318	0.411719	0.474744	0.53334	0.625001	0.725797	0.701539	0.715037	0.651139	0.838745	0.300209	0.329273	0.45146	0.443301	0.539781	0.346203	0.50998	0.426086	0.554752	0.591826	0.628447	0.746743	0.699273	0.732117	0.648623	0.850698	0.289056	0.313856	0.471301	0.538882	0.690374	0.298825	0.576556	0.586675	0.710118	0.515751	0.596035	0.730132	0.668488	0.708331	0.603198	0.80887	0.000363812
661	0.294263	0.330852	0.380847	0.37896	0.464161	0.346421	0.473084	0.411492	0.474569	0.533179	0.624786	0.725673	0.701281	0.71491	0.650924	0.838567	0.299993	0.329164	0.451299	0.443101	0.539573	0.346012	0.509687	0.425856	0.554596	0.591589	0.628273	0.746573	0.699076	0.731932	0.648435	0.8505	0.288923	0.313642	0.471034	0.538626	0.690124	0.298609	0.576175	0.586463	0.709596	0.514417	0.59578	0.729828	0.668139	0.708036	0.602829	0.808536	0.000360295
662	0.29415	0.330689	0.380663	0.378803	0.464006	0.346212	0.472875	0.411336	0.474405	0.53298	0.624599	0.725467	0.701121	0.714686	0.650743	0.838401	0.299846	0.328938	0.451116	0.442934	0.539443	0.345717	0.509469	0.425678	0.554448	0.591405	0.628001	0.746401	0.698822	0.731655	0.648163	0.850321	0.288761	0.313484	0.470864	0.538368	0.68981	0.298435	0.57576	0.586316	0.70929	0.512997	0.595537	0.729477	0.667751	0.707778	0.602456	0.808157	0.000359372
663	0.294026	0.330547	0.380546	0.378678	0.463876	0.346027	0.47264	0.411165	0.474222	0.532774	0.624421	0.725284	0.700876	0.714486	0.650492	0.838164	0.299714	0.328734	0.450989	0.442818	0.539333	0.345538	0.509196	0.425328	0.554303	0.591205	0.627812	0.746222	0.698524	0.731415	0.647944	0.850199	0.288615	0.313314	0.470595	0.538067	0.689614	0.298207	0.575496	0.586065	0.708894	0.511944	0.595223	0.729173	0.667458	0.707539	0.602102	0.807835	0.000354903
664	0.293877	0.330358	0.380426	0.378496	0.463709	0.345889	0.472411	0.411017	0.47408	0.532605	0.624151	0.72511	0.700691	0.71429	0.65021	0.837978	0.2996	0.32862	0.450842	0.442683	0.539132	0.345351	0.50894	0.425079	0.554146	0.591027	0.627496	0.745999	0.698242	0.731198	0.647663	0.850007	0.288478	0.313095	0.470419	0.537858	0.6894	0.298021	0.575155	0.585747	0.70847	0.51087	0.594943	0.728932	0.667157	0.707188	0.601713	0.807479	0.000352856
665	0.293731	0.330218	0.380296	0.378357	0.463518	0.345702	0.472181	0.410783	0.473833	0.532398	0.62392	0.725007	0.700475	0.714078	0.649983	0.837773	0.299397	0.328451	0.450702	0.442521	0.538908	0.345153	0.508667	0.424877	0.554027	0.590835	0.627326	0.745815	0.697915	0.731008	0.647416	0.849825	0.288274	0.312925	0.470214	0.537543	0.689074	0.297792	0.574815	0.58554	0.708116	0.509634	0.594725	0.728608	0.666832	0.706833	0.601323	0.807115	0.000342173
666	0.293656	0.33006	0.380146	0.37824	0.463388	0.345571	0.471962	0.410583	0.473616	0.532201	0.623712	0.7249	0.700247	0.713878	0.649846	0.837578	0.299265	0.328251	0.450493	0.44233	0.53875	0.344963	0.508472	0.424585	0.553811	0.590603	0.627137	0.745615	0.697694	0.730776	0.647198	0.849673	0.288114	0.312755	0.470028	0.537273	0.688868	0.297611	0.574346	0.58534	0.707654	0.508377	0.594455	0.728353	0.66653	0.706546	0.600955	0.80682	0.000337206
667	0.293532	0.329885	0.379987	0.37808	0.463242	0.345429	0.471719	0.410364	0.473453	0.53198	0.623547	0.72469	0.699984	0.713664	0.649616	0.837411	0.299109	0.328094	0.450269	0.442167	0.538592	0.344733	0.508208	0.424316	0.55361	0.590368	0.626876	0.745421	0.697435	0.730541	0.646948	0.849481	0.287961	0.312618	0.469829	0.537087	0.688633	0.297384	0.574095	0.585086	0.707267	0.507205	0.594149	0.72803	0.666166	0.706258	0.600714	0.806509	0.000328893
668	0.293393	0.329713	0.37979	0.377956	0.463117	0.345246	0.471512	0.410147	0.473211	0.531775	0.623328	0.724511	0.699733	0.713537	0.649363	0.837213	0.298961	0.32797	0.450106	0.442007	0.538457	0.344527	0.507924	0.4241	0.553467	0.590168	0.626664	0.745184	0.697204	0.730387	0.646677	0.849286	0.28782	0.312416	0.469539	0.536855	0.68841	0.297084	0.573776	0.584886	0.706906	0.505848	0.593872	0.727628	0.665866	0.705981	0.60032	0.806142	0.000325075
669	0.293282	0.329577	0.379617	0.377818	0.462953	0.345023	0.471357	0.409925	0.473023	0.531534	0.623186	0.724312	0.699497	0.713346	0.649166	0.837028	0.298846	0.327812	0.449875	0.441899	0.538339	0.344301	0.507636	0.423897	0.553287	0.589977	0.62641	0.744977	0.696936	0.730201	0.646416	0.849139	0.287641	0.312232	0.469332	0.536546	0.688159	0.296802	0.573524	0.584698	0.706582	0.504872	0.593478	0.727248	0.665517	0.705685	0.600016	0.805809	0.000313477
670	0.293125	0.329441	0.379455	0.377698	0.462786	0.344871	0.471176	0.409699	0.472832	0.531295	0.622985	0.72414	0.69932	0.713137	0.64891	0.836863	0.298712	0.327664	0.449714	0.441779	0.53821	0.344097	0.507466	0.42364	0.553117	0.589802	0.626199	0.744759	0.696702	0.729952	0.646145	0.84899	0.287506	0.312108	0.469178	0.536323	0.687939	0.296459	0.573282	0.58448	0.70618	0.503818	0.59322	0.726874	0.665175	0.705445	0.599626	0.805449	0.000311943
671	0.292983	0.329308	0.379268	0.377574	0.462653	0.344709	0.470898	0.409486	0.472648	0.531069	0.622797	0.723981	0.699123	0.712859	0.648695	0.836689	0.298594	0.327515	0.449558	0.44163	0.538039	0.343857	0.507227	0.423404	0.55289	0.589582	0.62598	0.744612	0.696367	0.729748	0.64587	0.848812	0.287373	0.311939	0.468987	0.536056	0.687751	0.296216	0.572984	0.584288	0.70584	0.502718	0.592957	0.726568	0.664899	0.705169	0.599261	0.805106	0.000307934
672	0.292821	0.329158	0.379065	0.377327	0.462507	0.344581	0.470664	0.409274	0.472487	0.530864	0.622635	0.723793	0.698835	0.712687	0.648445	0.836507	0.298453	0.327339	0.449411	0.44146	0.537914	0.343659	0.506911	0.423185	0.55264	0.589375	0.625758	0.744448	0.696171	0.729549	0.645622	0.848649	0.287229	0.311766	0.468816	0.535826	0.687537	0.295966	0.572668	0.584104	0.705492	0.501756	0.592682	0.72626	0.664653	0.704828	0.598967	0.804848	0.000306438
673	0.292667	0.329026	0.37892	0.377194	0.46238	0.344456	0.470434	0.409129	0.472311	0.530611	0.622485	0.723594	0.698591	0.712505	0.648276	0.836345	0.298325	0.327143	0.449129	0.441296	0.537776	0.343448	0.506637	0.422949	0.552462	0.589179	0.625549	0.744212	0.695931	0.729329	0.645421	0.848458	0.287094	0.311588	0.468652	0.535575	0.687315	0.295766	0.572319	0.583934	0.705101	0.50068	0.592398	0.725983	0.664312	0.704527	0.598634	0.804469	0.000292335
674	0.292579	0.328895	0.378784	0.377001	0.462246	0.344323	0.470144	0.408921	0.472106	0.530442	0.622275	0.723392	0.69837	0.712249	0.648046	0.836134	0.298147	0.326984	0.44898	0.441143	0.537633	0.343247	0.506366	0.422708	0.552266	0.588994	0.625264	0.744037	0.695656	0.729138	0.645237	0.84824	0.286944	0.311415	0.468395	0.535322	0.687024	0.295505	0.571978	0.583691	0.704692	0.49935	0.592052	0.725652	0.663925	0.704312	0.598263	0.804137	0.000288393
675	0.292476	0.328687	0.378654	0.376846	0.462109	0.344158	0.469896	0.408762	0.471953	0.5302	0.622088	0.723159	0.698144	0.712022	0.647788	0.835929	0.298045	0.32683	0.448779	0.441029	0.537483	0.342995	0.506102	0.422454	0.552042	0.588793	0.625038	0.743817	0.695377	0.728901	0.645018	0.848088	0.286797	0.311198	0.468183	0.535042	0.686828	0.295277	0.571646	0.583435	0.704293	0.498107	0.591793	0.725349	0.663557	0.704003	0.59782	0.80387	0.00028653
676	0.292351	0.328498	0.378527	0.376723	0.461972	0.343993	0.4697	0.408576	0.471776	0.529946	0.621892	0.72302	0.697916	0.711838	0.647561	0.835774	0.297911	0.326692	0.448584	0.440921	0.537334	0.342748	0.505844	0.422208	0.551824	0.588614	0.62478	0.743582	0.695114	0.72872	0.644739	0.847889	0.286649	0.311012	0.468009	0.534765	0.686626	0.295032	0.571198	0.583228	0.70393	0.496872	0.591504	0.725128	0.663154	0.70374	0.597467	0.803541	0.000281672
677	0.292223	0.328342	0.378364	0.376576	0.461871	0.343864	0.469475	0.408455	0.471566	0.529799	0.621691	0.722853	0.697643	0.711684	0.647365	0.8356	0.297781	0.326538	0.448456	0.44078	0.537171	0.342571	0.505564	0.421949	0.551616	0.588425	0.624604	0.743411	0.694858	0.728504	0.644573	0.847687	0.286514	0.310809	0.467839	0.534516	0.686412	0.29478	0.570829	0.583062	0.703473	0.495871	0.591214	0.724913	0.662855	0.703519	0.597117	0.803272	0.000271918
678	0.292051	0.32816	0.378188	0.376388	0.461734	0.343707	0.469251	0.408289	0.471409	0.529605	0.62151	0.722723	0.697358	0.711454	0.647131	0.835473	0.29762	0.326393	0.448286	0.44066	0.537027	0.342399	0.505239	0.421701	0.551375	0.588175	0.624424	0.743212	0.694626	0.728281	0.644388	0.847511	0.286382	0.310655	0.467612	0.534303	0.686155	0.294574	0.570525	0.582787	0.70322	0.49475	0.590926	0.724599	0.662622	0.703216	0.596822	0.802919	0.000271509
679	0.291876	0.328027	0.378047	0.376253	0.461599	0.343519	0.469019	0.408082	0.471186	0.529397	0.621249	0.722575	0.697079	0.711234	0.646944	0.83532	0.297476	0.326249	0.448121	0.440512	0.536877	0.342215	0.505011	0.421464	0.551216	0.587944	0.624219	0.743001	0.69436	0.728016	0.644114	0.84729	0.286235	0.310511	0.467389	0.534015	0.685913	0.294328	0.570196	0.582546	0.702873	0.493541	0.590658	0.724332	0.662338	0.702932	0.596543	0.802678	0.000270645
680	0.291748	0.327906	0.37788	0.376132	0.461474	0.343367	0.4688	0.407866	0.470962	0.529206	0.621029	0.722359	0.696864	0.711045	0.64672	0.835126	0.297357	0.326093	0.447962	0.44034	0.536713	0.341956	0.504787	0.421301	0.55103	0.587722	0.624013	0.742845	0.694138	0.727811	0.643852	0.8471	0.28609	0.310345	0.467156	0.533764	0.685726	0.294162	0.569905	0.582353	0.70245	0.492123	0.590348	0.723986	0.661984	0.702576	0.596248	0.802385	0.000264695
681	0.291662	0.327748	0.37774	0.375993	0.461361	0.343196	0.46852	0.407706	0.470759	0.529035	0.620838	0.722192	0.696611	0.710869	0.646444	0.834981	0.297197	0.325925	0.447819	0.440213	0.536526	0.341694	0.504519	0.421131	0.550852	0.587503	0.623795	0.742641	0.693858	0.727602	0.643595	0.846879	0.285967	0.31014	0.466955	0.53356	0.685523	0.293935	0.569615	0.582109	0.702154	0.490935	0.590121	0.723697	0.661701	0.702338	0.596028	0.802096	0.000264138
682	0.291539	0.327612	0.377596	0.375889	0.461258	0.343025	0.468297	0.407511	0.47056	0.528854	0.620682	0.721983	0.696456	0.710695	0.646216	0.834797	0.297073	0.325771	0.447675	0.440076	0.536349	0.34143	0.504326	0.420954	0.550691	0.587243	0.623561	0.742467	0.693579	0.72741	0.643353	0.846719	0.285775	0.309975	0.466802	0.533336	0.685281	0.293732	0.569308	0.581923	0.701771	0.489803	0.589828	0.723383	0.661382	0.702098	0.59568	0.801764	0.000263313
683	0.291403	0.327483	0.37746	0.375762	0.461082	0.34285	0.46804	0.407353	0.470345	0.528617	0.620449	0.721826	0.69631	0.710464	0.646009	0.834643	0.296988	0.325592	0.447522	0.439892	0.536223	0.34123	0.504097	0.420757	0.550484	0.587054	0.623329	0.742261	0.693293	0.727155	0.643127	0.846471	0.285645	0.309838	0.466658	0.533062	0.68504	0.2935	0.56901	0.58176	0.701364	0.488601	0.589563	0.723058	0.661085	0.701756	0.595348	0.801446	0.000260527
684	0.291293	0.327362	0.37731	0.375638	0.460934	0.342642	0.467773	0.40721	0.470149	0.528351	0.620269	0.721647	0.696127	0.710269	0.645823	0.834491	0.296852	0.325486	0.447324	0.439699	0.536063	0.341071	0.503908	0.42053	0.550299	0.58682	0.623098	0.742022	0.693089	0.726952	0.642882	0.846294	0.285457	0.309571	0.466446	0.532778	0.684818	0.293262	0.568541	0.58156	0.700817	0.487119	0.589267	0.722747	0.660887	0.701452	0.595039	0.80111	0.000260434
685	0.291113	0.327226	0.37715	0.375504	0.460828	0.342447	0.467575	0.407023	0.469933	0.528182	0.62004	0.721484	0.695885	0.710002	0.645657	0.834288	0.296748	0.325313	0.447138	0.439517	0.535919	0.340837	0.50366	0.420262	0.550112	0.586628	0.622864	0.741793	0.692867	0.726639	0.642649	0.846109	0.28533	0.309401	0.466234	0.532542	0.68452	0.293039	0.568256	0.581389	0.700368	0.486136	0.588972	0.72248	0.66061	0.701174	0.594704	0.800778	0.000260245
686	0.290978	0.327097	0.376983	0.375326	0.46071	0.342287	0.467347	0.406802	0.469748	0.527936	0.61981	0.721333	0.695675	0.709818	0.645371	0.834139	0.296601	0.325156	0.446958	0.439356	0.535764	0.340679	0.503431	0.420057	0.549897	0.586433	0.622628	0.741576	0.692642	0.726436	0.642419	0.845886	0.285182	0.309198	0.465993	0.53234	0.684298	0.292816	0.567904	0.581168	0.699963	0.484925	0.588649	0.722182	0.660317	0.700902	0.594419	0.800434	0.000254903
687	0.290858	0.32695	0.376809	0.375184	0.460592	0.342081	0.467102	0.406626	0.469556	0.527745	0.619622	0.721175	0.695481	0.70964	0.64508	0.833967	0.296477	0.325008	0.446823	0.439163	0.535622	0.34039	0.503197	0.419861	0.549685	0.586223	0.622378	0.741365	0.692415	0.7262	0.642152	0.845691	0.285049	0.30903	0.465783	0.532078	0.684079	0.292622	0.567445	0.580956	0.699587	0.483602	0.588414	0.721986	0.660035	0.700626	0.594074	0.800092	0.000249757
688	0.290725	0.326754	0.376641	0.375047	0.460451	0.341913	0.466878	0.406437	0.469337	0.52743	0.619433	0.720969	0.695288	0.709377	0.644802	0.833773	0.296336	0.324879	0.446644	0.439033	0.535482	0.340171	0.502908	0.41965	0.549503	0.586058	0.622176	0.741137	0.692195	0.726018	0.641965	0.84555	0.284929	0.30887	0.465651	0.531844	0.683831	0.292372	0.567115	0.580782	0.699258	0.48227	0.588164	0.721675	0.659671	0.70039	0.593729	0.799753	0.000246908
689	0.290555	0.326562	0.376483	0.374921	0.46029	0.341749	0.466651	0.406192	0.469131	0.527274	0.619206	0.720792	0.695076	0.709218	0.644618	0.833613	0.296209	0.324733	0.446487	0.438865	0.535315	0.340016	0.50269	0.419404	0.549273	0.585841	0.621982	0.740983	0.691961	0.725751	0.641719	0.845374	0.284784	0.308719	0.465458	0.531557	0.683533	0.292168	0.566875	0.58055	0.698937	0.480894	0.587837	0.721366	0.659392	0.700111	0.593348	0.799496	0.000242337
690	0.290455	0.326436	0.376339	0.374805	0.460132	0.34156	0.466414	0.406002	0.468918	0.527053	0.619009	0.72061	0.694873	0.708987	0.644303	0.833481	0.296082	0.324577	0.446371	0.438722	0.53513	0.339771	0.502372	0.419209	0.549074	0.585612	0.621768	0.740808	0.69171	0.725522	0.641471	0.845191	0.284615	0.308532	0.465284	0.53129	0.68333	0.291959	0.56648	0.580358	0.698427	0.48	0.587591	0.721023	0.659025	0.699883	0.592982	0.799302	0.000238935
691	0.29033	0.326308	0.376195	0.374676	0.459977	0.341336	0.466224	0.405793	0.46873	0.526854	0.618766	0.720432	0.69465	0.708823	0.644048	0.833299	0.295935	0.324407	0.446212	0.438592	0.534958	0.339597	0.502058	0.419013	0.548862	0.585454	0.621586	0.740594	0.691518	0.725269	0.641229	0.845028	0.284456	0.308396	0.465068	0.530984	0.683122	0.291735	0.566164	0.580174	0.698085	0.478733	0.587297	0.720679	0.658763	0.699535	0.592609	0.799006	0.000237579
692	0.290207	0.326159	0.376038	0.374532	0.459823	0.341171	0.466004	0.405611	0.468573	0.526627	0.618494	0.720308	0.694461	0.708579	0.643845	0.833144	0.29583	0.324238	0.446058	0.43839	0.534817	0.339386	0.501758	0.418793	0.548699	0.585237	0.621394	0.740347	0.69134	0.725062	0.640965	0.844856	0.284299	0.308233	0.464868	0.530681	0.682828	0.291567	0.565849	0.579994	0.697718	0.477279	0.587073	0.7204	0.658491	0.699185	0.592315	0.798713	0.00023172
693	0.290134	0.326026	0.375923	0.374431	0.45967	0.341027	0.465758	0.405441	0.468343	0.52643	0.618295	0.720122	0.694193	0.708337	0.643666	0.832956	0.295718	0.324051	0.445837	0.438233	0.534694	0.339159	0.501527	0.41859	0.548543	0.584998	0.62115	0.740166	0.691076	0.724802	0.640765	0.844681	0.284151	0.30807	0.464691	0.530421	0.682593	0.291353	0.565565	0.579782	0.697331	0.476342	0.586723	0.720084	0.658248	0.698926	0.59208	0.798474	0.000223657
694	0.28998	0.325853	0.375823	0.374305	0.459541	0.340871	0.465498	0.405228	0.46817	0.526185	0.618112	0.719966	0.693978	0.708133	0.643425	0.832763	0.295583	0.323885	0.445686	0.438114	0.534553	0.33896	0.501265	0.418377	0.548298	0.584777	0.620958	0.73996	0.69088	0.724598	0.640527	0.844464	0.284014	0.307869	0.464489	0.530189	0.682356	0.291123	0.56526	0.579501	0.696913	0.475085	0.58647	0.719753	0.657868	0.698701	0.591867	0.798167	0.000212563
695	0.289851	0.325628	0.375648	0.374148	0.459423	0.340701	0.465271	0.405052	0.467968	0.525991	0.617926	0.719827	0.69374	0.707953	0.643236	0.832638	0.295416	0.323747	0.445535	0.437986	0.534365	0.338719	0.50105	0.418152	0.54815	0.584562	0.620638	0.739765	0.690602	0.724384	0.640264	0.844253	0.283862	0.307708	0.464309	0.52993	0.682146	0.29092	0.564872	0.579353	0.696514	0.473659	0.58615	0.719388	0.657594	0.698424	0.59152	0.797757	0.00020233
696	0.289683	0.325481	0.375503	0.374003	0.459237	0.340543	0.46504	0.404857	0.467773	0.525795	0.617736	0.719621	0.693542	0.707708	0.643036	0.832446	0.295286	0.323615	0.44539	0.437818	0.534203	0.338565	0.500794	0.417973	0.547964	0.584345	0.620413	0.739617	0.690323	0.724213	0.640015	0.844115	0.283697	0.307523	0.464171	0.529704	0.681926	0.290696	0.564645	0.579173	0.696088	0.472474	0.585875	0.719063	0.657241	0.698057	0.59126	0.797505	0.000195621
697	0.289558	0.32537	0.375349	0.373874	0.459056	0.340388	0.464842	0.404665	0.467568	0.525584	0.617517	0.719424	0.693342	0.707506	0.64279	0.832291	0.295176	0.323463	0.445256	0.43768	0.534029	0.338364	0.500582	0.417741	0.547804	0.584104	0.620192	0.73941	0.690026	0.723955	0.639719	0.843936	0.283525	0.307383	0.463969	0.529424	0.681644	0.290465	0.564324	0.578985	0.69572	0.471067	0.585572	0.718785	0.65697	0.697767	0.590951	0.797224	0.000195248
698	0.289421	0.325201	0.375198	0.37369	0.458953	0.340273	0.464606	0.404476	0.467368	0.525389	0.617326	0.719213	0.6931	0.707296	0.642572	0.832101	0.295054	0.323301	0.445088	0.437509	0.533855	0.338195	0.500323	0.417585	0.547625	0.583873	0.619938	0.739139	0.68977	0.723704	0.639437	0.843764	0.28338	0.307214	0.463813	0.529151	0.681326	0.290216	0.563932	0.578714	0.69536	0.469963	0.585281	0.718521	0.656665	0.697527	0.590612	0.796916	0.000194052
699	0.289296	0.325076	0.37506	0.373575	0.458788	0.340109	0.464439	0.404317	0.467179	0.525163	0.617146	0.719029	0.692937	0.707094	0.64237	0.831948	0.294923	0.32312	0.44496	0.437308	0.533662	0.337935	0.500079	0.417359	0.547462	0.583627	0.61973	0.738973	0.689453	0.723481	0.639155	0.843548	0.283227	0.307033	0.463665	0.528838	0.681075	0.28995	0.563663	0.578499	0.695042	0.468631	0.584915	0.718234	0.656391	0.697254	0.590311	0.79668	0.000185197
700	0.289198	0.324943	0.374919	0.373442	0.458639	0.339942	0.464218	0.404147	0.466959	0.524899	0.616962	0.71888	0.692667	0.706883	0.642154	0.831764	0.294794	0.323008	0.444801	0.437167	0.533534	0.337773	0.499764	0.417178	0.547248	0.583395	0.619528	0.738775	0.689189	0.723225	0.638888	0.843347	0.283105	0.306903	0.463441	0.528569	0.680888	0.289766	0.563331	0.578251	0.694507	0.467587	0.584559	0.717918	0.656102	0.697014	0.590016	0.796341	0.000184551
701	0.289053	0.324792	0.374774	0.373263	0.458511	0.339771	0.46401	0.404013	0.466756	0.5247	0.616792	0.718687	0.692401	0.706652	0.641933	0.831572	0.294675	0.322836	0.444651	0.436983	0.533426	0.337551	0.499497	0.416997	0.54709	0.583178	0.619304	0.738556	0.688947	0.723014	0.638635	0.843159	0.282951	0.306755	0.463204	0.528358	0.680691	0.289539	0.562955	0.577993	0.694124	0.466342	0.584281	0.717619	0.65586	0.696749	0.589732	0.796006	0.000182622
702	0.288941	0.324682	0.374592	0.373127	0.458321	0.339601	0.463789	0.403857	0.466556	0.52454	0.616598	0.718523	0.69218	0.706373	0.641736	0.831359	0.294564	0.322653	0.444534	0.43685	0.533259	0.337368	0.49923	0.416792	0.546932	0.58296	0.619098	0.738298	0.688669	0.722807	0.638362	0.842961	0.282792	0.306588	0.462913	0.527991	0.680318	0.289329	0.562575	0.577779	0.693676	0.464665	0.584011	0.717292	0.65557	0.696456	0.589419	0.795712	0.000180519
703	0.288786	0.324535	0.374467	0.372992	0.45814	0.33945	0.46354	0.4037	0.466366	0.524369	0.616324	0.718287	0.691974	0.706175	0.641468	0.831179	0.294468	0.322529	0.444356	0.436683	0.533111	0.337171	0.498966	0.416567	0.546765	0.582777	0.618907	0.738108	0.688449	0.72259	0.638206	0.842772	0.282668	0.30642	0.462723	0.527739	0.680082	0.289107	0.562268	0.577591	0.693256	0.46319	0.583687	0.717022	0.655268	0.696234	0.589022	0.795399	0.000176644
704	0.288652	0.324405	0.374291	0.372873	0.45801	0.339285	0.463331	0.403451	0.466205	0.524157	0.616082	0.718052	0.691763	0.706017	0.641274	0.830992	0.294353	0.322407	0.444206	0.436549	0.53295	0.336992	0.498749	0.416301	0.546544	0.582569	0.618647	0.737894	0.688217	0.722332	0.638047	0.84261	0.282519	0.306268	0.462537	0.527466	0.679845	0.288852	0.561859	0.577384	0.692849	0.461622	0.583434	0.716759	0.655095	0.695898	0.588656	0.795102	0.000174494
705	0.28852	0.324253	0.37416	0.372704	0.457912	0.339093	0.463154	0.403261	0.465931	0.523947	0.615852	0.717835	0.691557	0.70582	0.641034	0.830822	0.294248	0.322266	0.444074	0.436374	0.532804	0.336759	0.4985	0.416118	0.546296	0.582306	0.618327	0.737736	0.687932	0.722138	0.637804	0.842393	0.282418	0.306083	0.462301	0.527189	0.679604	0.288634	0.561515	0.577149	0.692484	0.460197	0.583163	0.716456	0.654774	0.695629	0.588261	0.79484	0.000167056
706	0.288408	0.324105	0.373996	0.372567	0.457768	0.338911	0.462972	0.403069	0.465723	0.523802	0.615645	0.717667	0.69129	0.705547	0.64076	0.830673	0.294131	0.322139	0.443915	0.436238	0.532629	0.336558	0.49827	0.415868	0.546107	0.582112	0.618025	0.737547	0.687694	0.721911	0.637603	0.84223	0.282289	0.305943	0.462079	0.526954	0.679377	0.288418	0.561106	0.576917	0.692037	0.459005	0.582929	0.716094	0.654433	0.695344	0.587893	0.794634	0.000166067
707	0.288325	0.323919	0.373873	0.372444	0.457639	0.338712	0.462727	0.402824	0.465499	0.523559	0.615421	0.717473	0.691087	0.705385	0.640496	0.830494	0.294042	0.322022	0.443793	0.436033	0.532514	0.336312	0.497975	0.415663	0.545976	0.581851	0.617788	0.737358	0.687493	0.721654	0.637368	0.842055	0.282125	0.305765	0.461844	0.526708	0.679069	0.288212	0.560763	0.576595	0.691611	0.457936	0.582648	0.715762	0.65416	0.695038	0.587538	0.794257	0.000158842
708	0.288178	0.323786	0.373721	0.3723	0.457512	0.33852	0.462513	0.402619	0.465329	0.523353	0.615232	0.717319	0.690879	0.705188	0.640297	0.830338	0.293916	0.321886	0.443631	0.43591	0.532317	0.336127	0.497735	0.415402	0.545756	0.581581	0.617623	0.73712	0.687145	0.721453	0.637151	0.841865	0.281963	0.305609	0.461669	0.526413	0.678872	0.288006	0.560367	0.576406	0.691136	0.45679	0.582425	0.715432	0.653859	0.694766	0.587235	0.793868	0.000157519
709	0.288041	0.323613	0.373608	0.372155	0.457363	0.338372	0.462216	0.402442	0.465137	0.523147	0.615009	0.717149	0.690669	0.705047	0.64012	0.830152	0.293771	0.321736	0.443467	0.435784	0.532188	0.335914	0.49746	0.415184	0.545632	0.581406	0.617491	0.736899	0.686891	0.721209	0.636901	0.841702	0.281814	0.305466	0.461486	0.526168	0.678635	0.287737	0.559982	0.576121	0.690704	0.455595	0.582097	0.715111	0.65359	0.694471	0.586982	0.793502	0.000153478
710	0.287919	0.323477	0.373463	0.372046	0.457227	0.338216	0.461913	0.402297	0.464974	0.522899	0.61484	0.71697	0.690457	0.704835	0.639893	0.829993	0.293637	0.321577	0.443282	0.435621	0.532026	0.33566	0.497268	0.415003	0.545417	0.581218	0.617186	0.736685	0.686657	0.720922	0.636685	0.84147	0.281662	0.305325	0.461343	0.52583	0.678368	0.28752	0.559704	0.575879	0.69016	0.454542	0.581902	0.71474	0.653257	0.694279	0.5867	0.793078	0.000143296
711	0.287792	0.323362	0.373286	0.371892	0.457079	0.338066	0.461652	0.402123	0.464765	0.522711	0.614673	0.716781	0.690235	0.704646	0.63963	0.829801	0.293489	0.321411	0.443122	0.435483	0.531889	0.335464	0.496989	0.414786	0.545232	0.581042	0.617022	0.736512	0.686375	0.7207	0.636461	0.841292	0.281481	0.305165	0.461095	0.525569	0.678135	0.287313	0.559346	0.575686	0.689758	0.452743	0.581639	0.714421	0.652977	0.693994	0.586465	0.792768	0.000141563
712	0.287669	0.323195	0.373143	0.371779	0.456964	0.337921	0.46144	0.401961	0.46458	0.52254	0.614508	0.716617	0.690023	0.704455	0.639428	0.829586	0.293347	0.321201	0.44292	0.435339	0.531721	0.335271	0.496756	0.414596	0.545085	0.580881	0.616834	0.736306	0.686129	0.720532	0.636206	0.841124	0.281325	0.305007	0.460897	0.525217	0.677896	0.287011	0.558927	0.575478	0.689279	0.45145	0.581342	0.714123	0.65259	0.693746	0.586167	0.792421	0.000137986
713	0.287554	0.323062	0.372966	0.37167	0.456831	0.337746	0.461258	0.401783	0.464426	0.522385	0.61436	0.716458	0.689841	0.7043	0.639237	0.829467	0.293261	0.321043	0.44275	0.435217	0.531589	0.335078	0.496499	0.414391	0.544947	0.580696	0.616612	0.736086	0.685828	0.720304	0.635953	0.84091	0.28123	0.304804	0.460706	0.524967	0.677569	0.286777	0.558477	0.575264	0.688854	0.449903	0.58105	0.713745	0.652321	0.693397	0.585866	0.792071	0.000137503
714	0.287412	0.322926	0.372833	0.371517	0.456642	0.337602	0.461011	0.401631	0.464224	0.522167	0.614172	0.716277	0.689634	0.704125	0.638991	0.829308	0.293153	0.320887	0.442642	0.435033	0.531411	0.334815	0.4962	0.414202	0.544736	0.580476	0.61645	0.735906	0.685556	0.720094	0.635723	0.840683	0.281097	0.304625	0.460473	0.524641	0.677287	0.286599	0.558089	0.575054	0.688354	0.448831	0.580711	0.713454	0.652094	0.693086	0.585559	0.791776	0.000133585
715	0.287266	0.322772	0.372676	0.371391	0.456503	0.337449	0.460737	0.401399	0.464034	0.521985	0.613985	0.716101	0.689425	0.703943	0.638765	0.829151	0.293031	0.320715	0.44249	0.434921	0.531277	0.334635	0.495899	0.413955	0.544549	0.580263	0.616266	0.735681	0.685312	0.71985	0.635413	0.840531	0.280949	0.304441	0.460241	0.524356	0.676982	0.286366	0.557823	0.574777	0.68791	0.447269	0.580428	0.71317	0.651782	0.692863	0.585231	0.791459	0.000132672
716	0.287143	0.322636	0.372504	0.371211	0.45635	0.337295	0.460465	0.40122	0.463838	0.521786	0.613803	0.715916	0.689196	0.703816	0.638577	0.828975	0.292913	0.320559	0.442315	0.434763	0.531084	0.334453	0.495708	0.413713	0.544375	0.580104	0.616064	0.735501	0.685013	0.719622	0.635143	0.840366	0.280831	0.304272	0.460053	0.524088	0.676718	0.286138	0.557504	0.574531	0.687426	0.445777	0.58015	0.712856	0.651537	0.692575	0.584871	0.791113	0.000125488
717	0.286985	0.32249	0.372343	0.371094	0.456186	0.337134	0.460253	0.401039	0.463654	0.521608	0.613609	0.715719	0.688997	0.70362	0.6384	0.828759	0.292798	0.320422	0.442208	0.43464	0.530924	0.334234	0.495508	0.41348	0.544207	0.579841	0.615822	0.735269	0.684702	0.719367	0.634926	0.840186	0.280706	0.304036	0.45985	0.523773	0.676397	0.285909	0.557103	0.574294	0.687023	0.444364	0.579786	0.712524	0.651302	0.692321	0.584599	0.790721	0.000120771
718	0.286861	0.322362	0.37223	0.37097	0.456058	0.336982	0.460045	0.400851	0.463471	0.521409	0.613387	0.715533	0.688815	0.703391	0.638161	0.828583	0.29269	0.320242	0.442084	0.434465	0.53076	0.33402	0.495244	0.413228	0.54404	0.579672	0.61553	0.735057	0.684479	0.719162	0.634682	0.840012	0.280569	0.303896	0.459675	0.523487	0.676181	0.285697	0.556764	0.574104	0.686666	0.442758	0.57948	0.712179	0.650981	0.692003	0.5843	0.79024	0.000113131
719	0.286725	0.322209	0.372101	0.370835	0.455908	0.336792	0.45986	0.400682	0.46332	0.521195	0.613178	0.715365	0.688663	0.703099	0.637952	0.828415	0.292546	0.320076	0.441926	0.434328	0.530536	0.333829	0.494937	0.412988	0.543817	0.579462	0.615314	0.734881	0.684312	0.718968	0.634416	0.839765	0.280461	0.303697	0.459499	0.523131	0.676019	0.285496	0.556261	0.57388	0.686233	0.441177	0.579236	0.71192	0.650703	0.691673	0.584003	0.789903	0.000103589
720	0.286597	0.322093	0.371988	0.370714	0.455749	0.336657	0.45966	0.40052	0.463134	0.521019	0.612911	0.715185	0.688439	0.702913	0.637671	0.828182	0.292435	0.319982	0.441727	0.434208	0.530406	0.333602	0.494593	0.412804	0.543642	0.579198	0.615097	0.734705	0.684093	0.718749	0.634197	0.839564	0.280301	0.303551	0.459254	0.522827	0.67574	0.285253	0.555859	0.573626	0.685751	0.439848	0.578928	0.711613	0.650445	0.691346	0.58369	0.789642	0.000103289
721	0.286496	0.321964	0.37185	0.370609	0.455581	0.336505	0.459396	0.400334	0.462975	0.520838	0.612721	0.715009	0.688174	0.702778	0.637468	0.828074	0.292308	0.319843	0.44156	0.434063	0.53024	0.333416	0.494312	0.412539	0.543506	0.57897	0.614838	0.734497	0.683907	0.71854	0.633951	0.839415	0.28017	0.303357	0.459061	0.522546	0.675529	0.285046	0.555485	0.573383	0.685331	0.438064	0.578734	0.711325	0.650133	0.691027	0.583386	0.789321	0.000102361
722	0.286359	0.321831	0.371679	0.370463	0.455425	0.336351	0.459181	0.400178	0.462814	0.520683	0.612548	0.714835	0.687966	0.702553	0.63729	0.827874	0.292187	0.319625	0.441392	0.433893	0.530114	0.333199	0.494086	0.412354	0.543317	0.578754	0.6146	0.734298	0.683643	0.718323	0.63371	0.839216	0.279998	0.303231	0.45887	0.522281	0.675333	0.284769	0.555139	0.573135	0.684979	0.436355	0.578509	0.71103	0.649816	0.690675	0.583099	0.788954	9.49881e-05
723	0.286224	0.321702	0.371535	0.370314	0.455297	0.336188	0.458951	0.399946	0.462651	0.520507	0.612359	0.714688	0.68773	0.702251	0.637046	0.827711	0.292038	0.319458	0.441282	0.433697	0.529973	0.333056	0.493822	0.412117	0.543034	0.57852	0.614397	0.73405	0.683397	0.71809	0.633452	0.83905	0.279842	0.303063	0.458715	0.521926	0.675026	0.28458	0.554815	0.572895	0.68457	0.434988	0.57829	0.710669	0.649538	0.690275	0.582836	0.788574	8.97383e-05
724	0.286105	0.321534	0.371378	0.370161	0.455163	0.336046	0.458702	0.39974	0.462448	0.520282	0.612206	0.714507	0.687546	0.702031	0.636869	0.827523	0.291912	0.319308	0.441133	0.433521	0.529863	0.33287	0.493583	0.411903	0.542809	0.578249	0.614182	0.733869	0.683125	0.717883	0.633227	0.838886	0.279699	0.302896	0.458556	0.52159	0.674674	0.284344	0.554511	0.572688	0.684141	0.433189	0.578029	0.710379	0.649299	0.689933	0.582539	0.788272	8.582e-05
725	0.286003	0.321378	0.371248	0.37003	0.455011	0.335865	0.458528	0.399557	0.462283	0.520135	0.611973	0.714313	0.687317	0.70183	0.636615	0.827345	0.291789	0.319169	0.440875	0.433375	0.529692	0.332677	0.493321	0.411718	0.542585	0.57802	0.613956	0.733654	0.682829	0.717683	0.632967	0.838711	0.279556	0.302751	0.458344	0.521214	0.674318	0.28408	0.554108	0.572466	0.683749	0.431899	0.577755	0.710007	0.649013	0.689626	0.582235	0.787871	8.34587e-05
726	0.285875	0.32119	0.371108	0.36992	0.45492	0.335692	0.458329	0.39938	0.462081	0.519914	0.611729	0.714159	0.687119	0.701663	0.636381	0.827177	0.291677	0.319009	0.440736	0.433168	0.529504	0.332445	0.493104	0.411506	0.54239	0.57776	0.613617	0.733467	0.682573	0.717453	0.632724	0.838562	0.279425	0.302586	0.458181	0.520974	0.674004	0.283912	0.553833	0.572293	0.683434	0.430282	0.577449	0.709725	0.648651	0.689322	0.581939	0.787533	8.31248e-05
727	0.285755	0.321056	0.370981	0.369798	0.454803	0.335555	0.458078	0.399189	0.461885	0.519731	0.611575	0.713957	0.686857	0.701465	0.63615	0.826962	0.291543	0.318842	0.440604	0.432986	0.529329	0.332298	0.492924	0.411273	0.542105	0.57754	0.613384	0.733274	0.682335	0.717225	0.632504	0.838353	0.279311	0.302419	0.457984	0.52064	0.673744	0.283642	0.553327	0.572049	0.683085	0.429175	0.577176	0.709419	0.648361	0.689065	0.581528	0.787168	7.98932e-05
728	0.285615	0.320872	0.370859	0.369646	0.454681	0.335392	0.457884	0.399073	0.461732	0.519544	0.611443	0.713765	0.686711	0.701247	0.635962	0.826799	0.291419	0.318703	0.440448	0.432856	0.529213	0.332118	0.49266	0.411112	0.541881	0.577331	0.61318	0.73305	0.682081	0.717004	0.63227	0.838161	0.2792	0.302197	0.457755	0.520336	0.673507	0.283411	0.552859	0.571876	0.682461	0.427798	0.576978	0.709055	0.648045	0.688729	0.58123	0.786784	7.26332e-05
729	0.285465	0.320754	0.370677	0.369564	0.454529	0.335221	0.457601	0.398877	0.461525	0.519337	0.611237	0.713646	0.686478	0.700996	0.635747	0.826614	0.291287	0.318538	0.440266	0.432732	0.529085	0.331903	0.492402	0.410931	0.541717	0.576987	0.612968	0.732878	0.681762	0.716797	0.632018	0.837947	0.279014	0.302035	0.457548	0.520136	0.673215	0.28321	0.552522	0.571684	0.682136	0.426363	0.576602	0.708753	0.64773	0.688409	0.580853	0.786443	7.11224e-05
730	0.285289	0.320618	0.370559	0.369404	0.454396	0.335094	0.457393	0.398682	0.461354	0.519116	0.611042	0.713468	0.686273	0.700818	0.635544	0.826381	0.291154	0.318397	0.440081	0.432623	0.528904	0.331718	0.492132	0.410736	0.541512	0.576777	0.612799	0.732704	0.681536	0.716593	0.631759	0.837804	0.278858	0.30182	0.457324	0.519845	0.672908	0.282978	0.552197	0.571483	0.681811	0.424767	0.576373	0.708395	0.647408	0.688144	0.580588	0.786109	6.31838e-05
731	0.285166	0.320447	0.370419	0.369293	0.454219	0.334948	0.457159	0.398482	0.461185	0.518947	0.610845	0.713316	0.686043	0.700629	0.63529	0.82619	0.291003	0.318272	0.439904	0.432432	0.528794	0.331457	0.491914	0.410515	0.541338	0.576496	0.61268	0.732512	0.681282	0.71642	0.631498	0.837566	0.27875	0.301648	0.45714	0.519554	0.672581	0.282769	0.55183	0.571325	0.681349	0.4236	0.575972	0.708101	0.647122	0.687814	0.580351	0.785845	4.80538e-05
732	0.285014	0.320266	0.37027	0.369149	0.454087	0.334778	0.456913	0.398328	0.460942	0.518761	0.610666	0.713158	0.685777	0.700439	0.635022	0.826016	0.290906	0.318116	0.439728	0.432265	0.528651	0.331217	0.491676	0.41027	0.54118	0.576327	0.612503	0.732288	0.681006	0.716185	0.631293	0.837374	0.278637	0.301523	0.456972	0.519275	0.672366	0.282566	0.551505	0.571137	0.680833	0.421959	0.57571	0.707808	0.646872	0.687547	0.580033	0.785523	4.66873e-05
733	0.284918	0.320089	0.370138	0.369062	0.453931	0.334618	0.456664	0.398146	0.460733	0.518587	0.610461	0.712979	0.685559	0.700241	0.634842	0.825827	0.290781	0.318006	0.439596	0.432096	0.528484	0.331012	0.491404	0.410018	0.540965	0.576069	0.612321	0.732097	0.680813	0.715952	0.63108	0.837214	0.278476	0.301367	0.456728	0.518907	0.672102	0.282416	0.551014	0.570933	0.680347	0.42048	0.575453	0.707524	0.64644	0.687285	0.579724	0.785232	3.90264e-05
734	0.28482	0.319938	0.370016	0.36894	0.453815	0.334476	0.456495	0.397995	0.460548	0.518361	0.610248	0.712799	0.685417	0.700006	0.634642	0.825648	0.29063	0.317858	0.439379	0.43194	0.52833	0.330818	0.491054	0.409754	0.540747	0.575776	0.612157	0.731893	0.680514	0.7157	0.630835	0.837	0.278324	0.301182	0.456485	0.518524	0.671855	0.282243	0.550563	0.570708	0.679901	0.418608	0.575193	0.707231	0.646084	0.686909	0.579473	0.784941	3.66153e-05
735	0.284702	0.319749	0.369888	0.368821	0.453673	0.334336	0.456255	0.397816	0.460393	0.518107	0.610036	0.712625	0.685226	0.699791	0.634332	0.825511	0.290497	0.317702	0.439238	0.431787	0.528202	0.330629	0.490844	0.409603	0.540594	0.575591	0.611971	0.731647	0.680219	0.715486	0.630662	0.836837	0.278181	0.301034	0.456316	0.518238	0.671559	0.281942	0.550127	0.570459	0.679442	0.417275	0.574823	0.706777	0.645732	0.686584	0.579175	0.78459	2.40947e-05
736	0.284597	0.31959	0.369691	0.368696	0.453526	0.334191	0.456003	0.397602	0.46019	0.517956	0.609826	0.712433	0.685039	0.699587	0.634168	0.825276	0.290328	0.317539	0.439069	0.431624	0.528079	0.330455	0.490559	0.409394	0.540421	0.575341	0.611741	0.731436	0.679976	0.715281	0.630467	0.836665	0.278049	0.300815	0.4561	0.517895	0.671312	0.281686	0.549738	0.570219	0.679079	0.41557	0.574443	0.706551	0.645506	0.686279	0.578827	0.7843	1.81303e-05
737	0.284494	0.319459	0.369555	0.368561	0.453332	0.334034	0.455759	0.397421	0.459961	0.517743	0.609637	0.71221	0.684819	0.699425	0.633963	0.825096	0.290175	0.31739	0.438927	0.431457	0.527896	0.33021	0.490233	0.409191	0.540214	0.575145	0.611514	0.731212	0.679762	0.715106	0.63025	0.8365	0.277889	0.300643	0.455865	0.517638	0.671022	0.28145	0.54943	0.57005	0.678671	0.414138	0.574154	0.706177	0.645157	0.686016	0.578439	0.78402	1.32437e-05
738	0.284418	0.319301	0.369342	0.368406	0.453222	0.333906	0.455545	0.39721	0.459755	0.517494	0.609469	0.712016	0.684565	0.699214	0.633737	0.82491	0.290024	0.317175	0.438743	0.431319	0.527714	0.330046	0.490004	0.408887	0.540066	0.574905	0.611265	0.730999	0.679518	0.714847	0.629977	0.836333	0.277774	0.300463	0.455692	0.517313	0.670663	0.281253	0.549038	0.569828	0.678038	0.412156	0.573906	0.705944	0.644822	0.685723	0.578229	0.783682	3.74867e-06
739	0.284269	0.319121	0.369197	0.368298	0.453086	0.333755	0.455351	0.396983	0.459546	0.517293	0.609309	0.711852	0.684416	0.699043	0.633517	0.82472	0.289938	0.317022	0.438573	0.431166	0.527546	0.329885	0.489763	0.408707	0.539886	0.574723	0.611048	0.730821	0.679223	0.714609	0.629756	0.836097	0.277691	0.300283	0.455446	0.517054	0.67041	0.281009	0.548777	0.56963	0.677677	0.410319	0.573695	0.705587	0.644584	0.685431	0.577919	0.78338	0
740	0.284134	0.318985	0.369077	0.368175	0.452969	0.333592	0.455049	0.3968	0.459375	0.517025	0.609152	0.711628	0.684149	0.698843	0.63333	0.824552	0.289798	0.316908	0.438438	0.431013	0.527354	0.329642	0.489477	0.408437	0.53971	0.574487	0.610837	0.730623	0.678968	0.714426	0.629587	0.835953	0.277534	0.300108	0.455252	0.516743	0.670162	0.280791	0.548455	0.56934	0.677283	0.408299	0.573405	0.705252	0.644315	0.685181	0.577636	0.783046	0
741	0.284012	0.318826	0.368911	0.368056	0.452817	0.333443	0.454826	0.39661	0.459237	0.516852	0.608967	0.711464	0.683876	0.698621	0.633089	0.824353	0.289693	0.316768	0.438287	0.430822	0.527161	0.329467	0.489253	0.408214	0.539501	0.574288	0.610598	0.730386	0.678733	0.71422	0.629274	0.835733	0.27742	0.299947	0.455112	0.516515	0.669843	0.280594	0.548185	0.569139	0.676714	0.406925	0.573135	0.704914	0.643979	0.684787	0.577362	0.78276	0
742	0.283896	0.318728	0.368768	0.367934	0.452689	0.333289	0.454619	0.396402	0.459022	0.51664	0.608797	0.71128	0.683676	0.698435	0.632852	0.824187	0.289579	0.316632	0.438188	0.430648	0.527042	0.329326	0.48899	0.407949	0.539312	0.574038	0.610318	0.730156	0.678469	0.713985	0.629059	0.835533	0.277293	0.299799	0.454905	0.516181	0.669552	0.280421	0.547892	0.568884	0.676283	0.405251	0.572909	0.704567	0.643584	0.684529	0.577147	0.782425	0
743	0.283752	0.318596	0.368611	0.367804	0.452578	0.33306	0.454369	0.396273	0.45885	0.516487	0.608633	0.711129	0.683469	0.698263	0.63255	0.823921	0.289429	0.316478	0.438046	0.430505	0.526947	0.329154	0.488595	0.407686	0.539138	0.573813	0.610139	0.729948	0.678225	0.713753	0.628822	0.835366	0.277133	0.299619	0.454673	0.515922	0.669281	0.280204	0.547408	0.568582	0.675723	0.403623	0.572566	0.704191	0.643264	0.684246	0.576809	0.782076	0
744	0.283636	0.318478	0.368443	0.367705	0.45245	0.332904	0.454125	0.396054	0.458677	0.516302	0.608449	0.710962	0.683226	0.698029	0.632332	0.823773	0.289305	0.316305	0.437898	0.430383	0.526814	0.328968	0.488311	0.407487	0.538965	0.573582	0.609981	0.729776	0.677944	0.713514	0.628641	0.835185	0.276977	0.299476	0.454454	0.515704	0.668975	0.279977	0.547005	0.568394	0.675199	0.401995	0.572239	0.703903	0.642908	0.683892	0.576434	0.781651	0
745	0.283545	0.318352	0.368279	0.367588	0.452372	0.332766	0.453921	0.395851	0.458524	0.516117	0.608243	0.71081	0.682971	0.697902	0.632079	0.823602	0.289138	0.316141	0.437725	0.430198	0.52668	0.328749	0.488118	0.407248	0.538818	0.573379	0.609724	0.729611	0.677582	0.713245	0.628392	0.835008	0.276873	0.299288	0.454204	0.515425	0.6687	0.279722	0.546665	0.568139	0.674759	0.400031	0.571985	0.703559	0.642586	0.68356	0.576082	0.781296	0
746	0.283398	0.318206	0.36811	0.367419	0.452229	0.332657	0.453752	0.395606	0.458343	0.515909	0.608022	0.710648	0.682804	0.697712	0.631851	0.823419	0.289039	0.316004	0.437554	0.430078	0.526492	0.328549	0.487796	0.407069	0.538653	0.573128	0.60954	0.729474	0.677372	0.713017	0.628168	0.834819	0.2767	0.299143	0.454023	0.515102	0.66843	0.279531	0.546363	0.567851	0.674206	0.398076	0.571601	0.703229	0.642319	0.683354	0.575757	0.780972	0
747	0.283268	0.318079	0.367929	0.36729	0.452092	0.332432	0.453571	0.395427	0.458144	0.515702	0.607879	0.710491	0.682554	0.697572	0.631587	0.823209	0.288912	0.315843	0.437422	0.429936	0.526396	0.328316	0.487507	0.406868	0.538442	0.572889	0.609314	0.729259	0.677108	0.712794	0.62796	0.834638	0.276564	0.299	0.453778	0.514851	0.668124	0.27933	0.546022	0.567622	0.673707	0.396245	0.571303	0.702902	0.641958	0.683124	0.575438	0.780753	0
748	0.28317	0.317958	0.3678	0.367181	0.451966	0.332292	0.453353	0.395198	0.457932	0.51554	0.607639	0.710323	0.682334	0.697424	0.631396	0.823035	0.288801	0.31574	0.437287	0.429779	0.526255	0.328142	0.487329	0.406641	0.538231	0.572696	0.609047	0.729018	0.676915	0.712587	0.627664	0.834501	0.276436	0.298841	0.453569	0.514633	0.667786	0.279136	0.545657	0.567367	0.673281	0.395051	0.570965	0.702631	0.6416	0.682849	0.57514	0.78042	0
749	0.283035	0.317827	0.367641	0.367015	0.451836	0.332174	0.453089	0.394951	0.457731	0.515335	0.607475	0.710135	0.682131	0.697229	0.631164	0.822866	0.288697	0.315608	0.437107	0.429643	0.526088	0.327902	0.487135	0.406451	0.538063	0.57248	0.608839	0.7288	0.676695	0.712358	0.627437	0.834303	0.276277	0.298702	0.453326	0.514326	0.667521	0.278925	0.545191	0.567099	0.672898	0.393516	0.570733	0.702281	0.641252	0.682536	0.574741	0.780185	0
750	0.282901	0.317693	0.367485	0.366909	0.451671	0.332047	0.452844	0.394744	0.457536	0.51513	0.607258	0.709946	0.681946	0.697045	0.63096	0.822682	0.288522	0.315482	0.43692	0.429531	0.525959	0.327657	0.486908	0.406254	0.537883	0.572262	0.608621	0.72852	0.67651	0.712057	0.627149	0.834097	0.276134	0.298497	0.453179	0.514044	0.667235	0.278639	0.544826	0.566823	0.672522	0.391951	0.570415	0.701942	0.640927	0.682257	0.574406	0.77989	0
751	0.2828	0.317585	0.367356	0.366762	0.451516	0.331887	0.452637	0.394529	0.457356	0.514906	0.607053	0.709779	0.681747	0.696843	0.630738	0.82253	0.288401	0.315321	0.436805	0.429423	0.525855	0.327489	0.486668	0.406038	0.537697	0.572057	0.608468	0.728326	0.676285	0.711855	0.626948	0.833924	0.275981	0.298292	0.452907	0.513734	0.66689	0.278438	0.544513	0.566572	0.672227	0.390108	0.570134	0.701636	0.640659	0.681895	0.574071	0.779582	0
752	0.282677	0.31744	0.367198	0.366644	0.451392	0.331746	0.452399	0.394372	0.457176	0.514683	0.606823	0.709642	0.681488	0.696619	0.630513	0.822342	0.288232	0.315208	0.436631	0.429226	0.525743	0.327232	0.486486	0.405863	0.537474	0.571889	0.608243	0.728131	0.676041	0.711621	0.626734	0.833746	0.275856	0.298152	0.452713	0.513419	0.666629	0.278248	0.544242	0.566344	0.671755	0.38852	0.569901	0.701207	0.640343	0.681585	0.573756	0.779211	0
753	0.282562	0.317304	0.367067	0.366538	0.451248	0.331565	0.452179	0.394233	0.456894	0.514432	0.60665	0.709467	0.681246	0.696414	0.630338	0.82214	0.288085	0.315072	0.436486	0.429074	0.52562	0.327002	0.486265	0.405631	0.537309	0.571621	0.607963	0.727987	0.675818	0.71142	0.626478	0.833597	0.275753	0.297984	0.452451	0.513096	0.666382	0.277992	0.543917	0.56609	0.671203	0.386912	0.569599	0.700775	0.640099	0.681291	0.573401	0.77894	0
754	0.282443	0.317139	0.366906	0.366431	0.451106	0.331405	0.451962	0.394044	0.456745	0.514256	0.606472	0.70927	0.681014	0.696208	0.630172	0.821985	0.287974	0.314935	0.436334	0.428944	0.525467	0.326704	0.486078	0.405403	0.537128	0.571374	0.607746	0.72782	0.675636	0.711166	0.626247	0.833383	0.275617	0.29779	0.452251	0.512778	0.666045	0.277807	0.543578	0.565891	0.670586	0.385404	0.569306	0.700379	0.639843	0.680999	0.573087	0.778612	0
755	0.282289	0.317012	0.366772	0.36629	0.450946	0.331227	0.45179	0.393843	0.456561	0.514086	0.606295	0.709088	0.680809	0.696014	0.630002	0.821828	0.287843	0.314771	0.436202	0.428799	0.525305	0.326542	0.485807	0.405103	0.53691	0.571152	0.607536	0.727585	0.675424	0.710936	0.625986	0.833231	0.275485	0.297658	0.451969	0.512482	0.665785	0.277638	0.543205	0.56564	0.670133	0.384058	0.569057	0.700065	0.639583	0.680683	0.572731	0.778208	0
756	0.282146	0.316848	0.366647	0.366141	0.450792	0.331109	0.451602	0.393685	0.456374	0.513911	0.606069	0.708892	0.680589	0.695831	0.629813	0.821648	0.2877	0.314612	0.436004	0.428605	0.525164	0.326361	0.485613	0.404931	0.536694	0.570927	0.607344	0.727434	0.675244	0.710728	0.625724	0.833068	0.275335	0.297487	0.451706	0.512228	0.665497	0.277405	0.542854	0.56538	0.669679	0.382295	0.568795	0.699736	0.639304	0.680342	0.5724	0.777775	0
757	0.282009	0.316676	0.366513	0.366032	0.450645	0.330956	0.451412	0.393507	0.456157	0.51371	0.605889	0.708724	0.68033	0.695656	0.629566	0.821455	0.287558	0.314485	0.435864	0.428425	0.525012	0.326206	0.485326	0.404693	0.536501	0.570667	0.607098	0.727244	0.67507	0.710557	0.625488	0.832882	0.27519	0.297347	0.45148	0.511927	0.66517	0.277225	0.542654	0.5651	0.669148	0.380679	0.568516	0.699389	0.638936	0.679995	0.572056	0.777471	0
758	0.28187	0.316547	0.366409	0.365921	0.450495	0.330837	0.451226	0.393356	0.455924	0.513538	0.605702	0.708543	0.680134	0.695472	0.62941	0.821279	0.287459	0.314311	0.435726	0.428316	0.52486	0.32604	0.485099	0.404469	0.536333	0.570381	0.606815	0.727007	0.674879	0.710318	0.625222	0.832728	0.275067	0.297148	0.451268	0.511622	0.664883	0.276986	0.542256	0.564848	0.66872	0.379204	0.568252	0.699058	0.63868	0.67962	0.571777	0.777195	0
759	0.281723	0.316442	0.366283	0.365815	0.450334	0.330657	0.451005	0.393113	0.455755	0.513366	0.605504	0.708364	0.67989	0.695216	0.629179	0.821117	0.287326	0.314127	0.435598	0.428147	0.524652	0.325817	0.484853	0.404212	0.536154	0.570127	0.606619	0.726769	0.674622	0.71007	0.62506	0.832592	0.274947	0.297013	0.451098	0.511362	0.664567	0.276766	0.541865	0.5646	0.668191	0.37748	0.568004	0.698784	0.63838	0.679203	0.571453	0.776916	0
760	0.281606	0.316327	0.366151	0.365705	0.450207	0.330551	0.450783	0.392957	0.45561	0.513189	0.605357	0.708195	0.679666	0.695032	0.628905	0.820906	0.287222	0.313999	0.435489	0.42796	0.524454	0.325591	0.484615	0.404022	0.535974	0.569848	0.606388	0.726588	0.674378	0.709859	0.624756	0.83243	0.27481	0.296864	0.450947	0.511149	0.664201	0.276592	0.54148	0.564314	0.667709	0.37581	0.567742	0.698449	0.638102	0.678779	0.571153	0.77652	0
761	0.281498	0.316205	0.365998	0.36559	0.450109	0.330429	0.450553	0.39281	0.455437	0.513019	0.605101	0.708001	0.679493	0.694864	0.628653	0.820709	0.287112	0.313859	0.435353	0.427807	0.524328	0.325404	0.484353	0.403851	0.535725	0.56966	0.606213	0.726419	0.674141	0.709685	0.624505	0.83223	0.274691	0.296735	0.450742	0.510904	0.663822	0.27631	0.541154	0.564124	0.667014	0.374307	0.567413	0.698082	0.637868	0.678526	0.570902	0.776152	0
762	0.281392	0.316098	0.365887	0.365466	0.449955	0.330262	0.450343	0.392648	0.455271	0.512846	0.604863	0.707805	0.679283	0.694707	0.628459	0.820583	0.287009	0.313742	0.435152	0.427686	0.524198	0.325214	0.484105	0.403684	0.535559	0.569484	0.606023	0.72622	0.673852	0.709436	0.624304	0.832024	0.274598	0.296588	0.450456	0.510594	0.663526	0.276154	0.540783	0.563834	0.66629	0.373188	0.567157	0.697795	0.637555	0.67829	0.57064	0.775893	0
763	0.281234	0.315972	0.365732	0.36535	0.449807	0.330132	0.450098	0.392487	0.455095	0.512664	0.604733	0.707619	0.679093	0.694501	0.628218	0.820383	0.286926	0.313555	0.434941	0.427546	0.524032	0.325033	0.483884	0.40345	0.535425	0.569256	0.605789	0.726005	0.673631	0.709213	0.62404	0.831828	0.274471	0.296417	0.450283	0.510401	0.663262	0.275914	0.540357	0.563601	0.665756	0.371626	0.566884	0.697396	0.637268	0.677966	0.570263	0.775485	0
764	0.281098	0.315849	0.365594	0.365194	0.449663	0.329991	0.449866	0.392349	0.454909	0.512405	0.604476	0.707435	0.678851	0.694313	0.627981	0.820191	0.286823	0.313434	0.434814	0.427382	0.523886	0.324827	0.483644	0.403258	0.53526	0.569008	0.605631	0.725799	0.673458	0.709016	0.623751	0.831638	0.274342	0.29628	0.450051	0.510089	0.662995	0.275722	0.540027	0.563304	0.665165	0.370065	0.566646	0.697109	0.636997	0.677722	0.569988	0.775199	0
765	0.280961	0.315721	0.365461	0.365071	0.449546	0.329842	0.449636	0.392201	0.454697	0.512212	0.604292	0.707324	0.678574	0.69418	0.627735	0.820032	0.286687	0.313327	0.43468	0.427269	0.523749	0.324602	0.483343	0.403046	0.535107	0.568799	0.605407	0.725602	0.673255	0.708828	0.623492	0.83143	0.274128	0.296142	0.449867	0.509754	0.662773	0.275515	0.539727	0.563083	0.664673	0.36876	0.566342	0.696732	0.636719	0.677402	0.569693	0.77483	0
766	0.28086	0.315531	0.365332	0.364916	0.44941	0.329696	0.449392	0.392024	0.454504	0.512021	0.604098	0.707197	0.678404	0.694017	0.627516	0.819854	0.286535	0.313197	0.434512	0.427129	0.523642	0.324432	0.483058	0.40281	0.534907	0.568636	0.60518	0.725363	0.672994	0.70851	0.623324	0.831282	0.273972	0.296003	0.449655	0.509458	0.662524	0.275315	0.539365	0.562838	0.663991	0.367376	0.566021	0.696372	0.636424	0.677178	0.569388	0.774528	0
767	0.280742	0.31538	0.36519	0.364805	0.449268	0.329563	0.449153	0.391847	0.454317	0.511861	0.603876	0.706983	0.678139	0.693865	0.627295	0.819659	0.28641	0.313064	0.434364	0.426939	0.523493	0.32423	0.482872	0.402603	0.534723	0.56844	0.604952	0.725184	0.672823	0.708346	0.623105	0.831107	0.273826	0.295842	0.449444	0.509066	0.662249	0.27513	0.538913	0.562577	0.663392	0.365743	0.565817	0.696027	0.63612	0.676878	0.569114	0.774186	0
768	0.280633	0.315199	0.365044	0.364648	0.449128	0.329412	0.448994	0.391589	0.454141	0.511624	0.603725	0.706763	0.677882	0.693684	0.627081	0.819474	0.286294	0.312943	0.434203	0.426775	0.523342	0.324019	0.482587	0.402406	0.534531	0.568238	0.604717	0.724925	0.672555	0.708165	0.622882	0.830944	0.27368	0.295643	0.449189	0.508799	0.661954	0.274919	0.538532	0.56232	0.662948	0.364069	0.565495	0.695798	0.635781	0.67646	0.568741	0.773934	0
769	0.280504	0.315055	0.364916	0.364489	0.448983	0.329216	0.448821	0.391367	0.453986	0.511474	0.603497	0.706605	0.677683	0.693475	0.626807	0.819315	0.286167	0.312835	0.434012	0.426588	0.523148	0.323844	0.482345	0.402189	0.534326	0.568019	0.604534	0.724772	0.672333	0.707954	0.6227	0.830772	0.273587	0.295469	0.448999	0.508456	0.661662	0.274695	0.538158	0.562057	0.662296	0.362443	0.565286	0.695515	0.635563	0.676239	0.568449	0.773577	0
770	0.280372	0.314912	0.364801	0.364329	0.448853	0.329054	0.448609	0.391216	0.453807	0.51129	0.603217	0.706424	0.677511	0.693291	0.626534	0.819176	0.285972	0.312714	0.433821	0.426443	0.522997	0.323627	0.482092	0.401975	0.534208	0.567838	0.604312	0.724581	0.672108	0.707704	0.622453	0.830572	0.273462	0.29526	0.448756	0.508128	0.661398	0.274483	0.537736	0.561851	0.661691	0.360932	0.565013	0.695105	0.635342	0.675967	0.568204	0.773304	0
771	0.280251	0.314783	0.364673	0.364205	0.448698	0.328848	0.44838	0.391064	0.45356	0.511084	0.603027	0.706292	0.677343	0.693106	0.62636	0.819009	0.285822	0.312572	0.433637	0.426274	0.522803	0.323473	0.481871	0.401755	0.534027	0.567597	0.6041	0.724394	0.671915	0.707471	0.622273	0.830426	0.273316	0.295089	0.448567	0.507791	0.66113	0.274253	0.53736	0.56166	0.661231	0.35924	0.564804	0.694862	0.635067	0.675609	0.567902	0.773056	0
772	0.280138	0.314686	0.364536	0.364062	0.448578	0.328711	0.44819	0.390932	0.453357	0.51088	0.602842	0.706065	0.677077	0.692939	0.626171	0.818851	0.285716	0.312485	0.433464	0.42613	0.522685	0.323284	0.481565	0.401589	0.533843	0.567403	0.603855	0.724185	0.671667	0.707267	0.622099	0.830215	0.273172	0.294901	0.448337	0.507532	0.660829	0.274013	0.537033	0.561327	0.660674	0.357594	0.564489	0.694576	0.634771	0.675421	0.567661	0.772795	0
773	0.280023	0.314563	0.364418	0.363934	0.448461	0.328588	0.447944	0.390731	0.453186	0.510726	0.602599	0.705879	0.676851	0.692756	0.62598	0.818708	0.285583	0.312305	0.433322	0.426026	0.522537	0.323026	0.481328	0.401425	0.533659	0.567179	0.603594	0.724027	0.671441	0.707053	0.621878	0.830068	0.273015	0.294738	0.448182	0.507269	0.660569	0.273764	0.53663	0.561083	0.660128	0.355846	0.564212	0.694198	0.634482	0.674989	0.56722	0.772389	0
774	0.279873	0.314455	0.364286	0.363841	0.448326	0.328422	0.447698	0.390569	0.45301	0.510559	0.602375	0.705692	0.676621	0.692562	0.625774	0.818526	0.285487	0.312172	0.433154	0.425858	0.522338	0.322811	0.481134	0.40118	0.533515	0.567027	0.603361	0.723773	0.671148	0.706858	0.621637	0.829889	0.272888	0.294579	0.44797	0.506964	0.660334	0.273586	0.536056	0.56083	0.659374	0.353901	0.563882	0.693842	0.634223	0.674776	0.566914	0.772021	0
775	0.279783	0.314292	0.364119	0.3637	0.448199	0.328256	0.447504	0.390327	0.45285	0.510368	0.602182	0.705489	0.676416	0.692368	0.625523	0.818369	0.285367	0.31204	0.432944	0.425724	0.522166	0.322658	0.480907	0.400989	0.53333	0.566769	0.603171	0.723544	0.670895	0.706678	0.621423	0.8297	0.27275	0.294416	0.447768	0.50659	0.659946	0.27335	0.535579	0.560541	0.658868	0.352589	0.563605	0.693482	0.633885	0.674428	0.566616	0.77168	0
776	0.279652	0.314153	0.364044	0.363575	0.448063	0.328101	0.447252	0.390189	0.45273	0.510179	0.602022	0.705327	0.67619	0.692178	0.625338	0.81821	0.285241	0.311922	0.432798	0.425626	0.521984	0.322446	0.480732	0.400787	0.533177	0.566573	0.602975	0.723363	0.670584	0.706408	0.621213	0.829522	0.272576	0.294261	0.447609	0.506337	0.659687	0.273094	0.535257	0.560325	0.658355	0.351021	0.563317	0.693122	0.633583	0.674056	0.566223	0.771336	0
777	0.279494	0.31402	0.363867	0.363433	0.447946	0.327967	0.447054	0.389994	0.452609	0.509969	0.601822	0.705118	0.675967	0.691994	0.625168	0.818023	0.285107	0.311757	0.432622	0.425436	0.521831	0.32221	0.480533	0.400585	0.532997	0.566359	0.602724	0.723182	0.670339	0.706212	0.621021	0.829372	0.272426	0.294119	0.44736	0.506001	0.659332	0.272882	0.534916	0.560132	0.657572	0.349565	0.563076	0.692766	0.633214	0.673806	0.565909	0.770998	0
778	0.279392	0.313858	0.363733	0.363276	0.447823	0.327833	0.446864	0.38986	0.452443	0.509774	0.601606	0.704955	0.675725	0.691825	0.624925	0.817879	0.284993	0.311624	0.432467	0.425307	0.52164	0.32199	0.480312	0.400394	0.532854	0.566138	0.60253	0.722945	0.670126	0.705961	0.620753	0.82919	0.272292	0.293988	0.447143	0.505728	0.659064	0.27269	0.534591	0.559943	0.657056	0.348031	0.5628	0.692373	0.632807	0.673572	0.565642	0.770576	0
779	0.279262	0.313718	0.363629	0.363163	0.447691	0.327671	0.446629	0.389744	0.45227	0.509603	0.601382	0.704804	0.675522	0.691661	0.624696	0.817708	0.284892	0.311477	0.432267	0.425129	0.521487	0.32178	0.480101	0.400198	0.532654	0.565958	0.602281	0.722726	0.6698	0.705691	0.620527	0.829032	0.272154	0.293839	0.44693	0.505341	0.658853	0.272533	0.534337	0.559656	0.656306	0.346094	0.562519	0.692008	0.632479	0.673258	0.565323	0.77024	0
780	0.279117	0.313535	0.363467	0.36303	0.447555	0.327452	0.446388	0.389554	0.452045	0.5094	0.601184	0.704595	0.675315	0.691392	0.624476	0.817511	0.284761	0.311364	0.432115	0.424987	0.521294	0.32157	0.479815	0.400008	0.532405	0.565764	0.602036	0.722507	0.669548	0.705497	0.620316	0.828848	0.27201	0.293708	0.446703	0.505077	0.658569	0.272361	0.533863	0.559406	0.655689	0.34452	0.562253	0.691757	0.632144	0.673015	0.565024	0.770014	0
781	0.278956	0.313381	0.363319	0.362905	0.447413	0.327268	0.446169	0.389347	0.451894	0.509228	0.601013	0.704364	0.675093	0.691228	0.624265	0.817277	0.284678	0.311255	0.431967	0.424825	0.521139	0.321388	0.479578	0.399713	0.532219	0.565605	0.601789	0.72222	0.669282	0.705261	0.620064	0.828702	0.271903	0.29351	0.446535	0.504715	0.658193	0.27215	0.533515	0.559133	0.655353	0.342478	0.561919	0.691358	0.631845	0.672729	0.564684	0.769784	0
782	0.278869	0.313282	0.363173	0.362803	0.447284	0.327151	0.44591	0.389186	0.451796	0.508955	0.600808	0.704204	0.674908	0.690996	0.624061	0.817118	0.284563	0.311147	0.431813	0.424682	0.521001	0.321221	0.4794	0.399483	0.532013	0.565441	0.601563	0.722	0.669008	0.70507	0.619754	0.828506	0.27175	0.293349	0.446375	0.504388	0.657825	0.271961	0.533052	0.558831	0.654871	0.340951	0.561622	0.691029	0.631524	0.672433	0.564362	0.769468	0
783	0.278784	0.313173	0.363052	0.362625	0.447133	0.327005	0.445718	0.388992	0.451582	0.508751	0.6006	0.703981	0.674691	0.690814	0.623813	0.816948	0.284457	0.31101	0.431636	0.424568	0.520834	0.321009	0.479155	0.399275	0.53179	0.565217	0.60135	0.721804	0.668731	0.704902	0.619567	0.828362	0.27164	0.293178	0.446196	0.504062	0.657452	0.271772	0.532794	0.55861	0.654434	0.339453	0.561462	0.690673	0.631307	0.672189	0.563951	0.769215	0
784	0.278681	0.313062	0.362931	0.362501	0.447018	0.326888	0.445468	0.388784	0.451403	0.508553	0.600413	0.70372	0.674496	0.690659	0.62358	0.816789	0.284365	0.310901	0.431469	0.424409	0.520698	0.32085	0.478946	0.399044	0.531617	0.564954	0.601204	0.721578	0.668495	0.704676	0.619272	0.828193	0.271509	0.293018	0.446007	0.503726	0.657145	0.271604	0.532435	0.558391	0.65373	0.337503	0.561235	0.690351	0.63098	0.671844	0.563688	0.768871	0
785	0.278568	0.312936	0.362809	0.362333	0.446899	0.32677	0.445219	0.388613	0.451214	0.508403	0.600208	0.703599	0.67431	0.690428	0.623365	0.816638	0.284223	0.310752	0.431334	0.424249	0.520506	0.320612	0.478714	0.398842	0.531377	0.564723	0.600999	0.72135	0.668247	0.704489	0.619061	0.828035	0.27138	0.292871	0.44575	0.503497	0.656804	0.271382	0.532124	0.558161	0.653059	0.336294	0.561006	0.69001	0.630729	0.671514	0.563412	0.768503	0
786	0.278466	0.312791	0.362689	0.362224	0.446758	0.326642	0.445061	0.388463	0.451047	0.508161	0.600036	0.70344	0.674112	0.690177	0.623149	0.816492	0.284099	0.310626	0.431197	0.42408	0.52037	0.320432	0.478492	0.398597	0.53116	0.564489	0.600762	0.721149	0.668007	0.70426	0.618844	0.827801	0.271242	0.292767	0.445574	0.503149	0.656505	0.271133	0.531686	0.557919	0.652472	0.334437	0.560722	0.689625	0.630428	0.671198	0.563102	0.768166	0
787	0.278368	0.312672	0.362575	0.362104	0.446624	0.326496	0.444789	0.388314	0.450848	0.507969	0.599862	0.703216	0.673878	0.68996	0.62293	0.816303	0.284007	0.31047	0.431071	0.423922	0.520219	0.320229	0.478282	0.398416	0.530977	0.564217	0.600549	0.720937	0.667788	0.704064	0.618574	0.827617	0.271117	0.292635	0.445369	0.502793	0.656144	0.270836	0.531313	0.557669	0.652038	0.33278	0.56046	0.689219	0.630141	0.670958	0.562754	0.767835	0
788	0.278264	0.31254	0.362431	0.362	0.44649	0.326346	0.44457	0.388113	0.450686	0.507763	0.5997	0.702979	0.67367	0.689767	0.622737	0.816131	0.283868	0.310325	0.430894	0.423793	0.520064	0.320051	0.478091	0.398239	0.530826	0.564028	0.600326	0.720736	0.667615	0.7039	0.618389	0.827449	0.270983	0.292475	0.445159	0.502313	0.655824	0.27066	0.530996	0.557402	0.651658	0.330622	0.560189	0.688915	0.629859	0.670543	0.562365	0.76753	0
789	0.27816	0.312399	0.362289	0.361891	0.446371	0.326229	0.444397	0.387922	0.450436	0.507627	0.599495	0.702845	0.673441	0.689592	0.622567	0.815957	0.283772	0.310177	0.430713	0.423642	0.519947	0.319875	0.477897	0.398046	0.53062	0.563811	0.600156	0.720495	0.667375	0.703746	0.618169	0.827291	0.270851	0.292317	0.444933	0.501998	0.655463	0.270456	0.530601	0.557187	0.65103	0.328834	0.559858	0.68862	0.629505	0.67022	0.561935	0.767124	0
790	0.278044	0.312243	0.362157	0.361754	0.446225	0.326073	0.444181	0.387686	0.450274	0.507483	0.599287	0.702693	0.673264	0.689419	0.622378	0.815797	0.283668	0.310026	0.430561	0.423512	0.519817	0.319707	0.477587	0.397864	0.53047	0.563578	0.599938	0.720295	0.66718	0.703448	0.617969	0.827085	0.270724	0.292091	0.444696	0.501724	0.655156	0.270208	0.530191	0.55696	0.650594	0.32723	0.559558	0.688246	0.629124	0.669944	0.561602	0.766811	0
791	0.277947	0.312151	0.362073	0.361657	0.446086	0.325916	0.443984	0.387542	0.450106	0.507369	0.599143	0.702492	0.673029	0.68928	0.62219	0.81566	0.283557	0.30988	0.43046	0.423369	0.519667	0.319539	0.477301	0.397693	0.530301	0.563321	0.599716	0.720109	0.666858	0.703274	0.617692	0.826888	0.270577	0.291931	0.444502	0.501384	0.65479	0.269955	0.529845	0.556672	0.650032	0.325743	0.559299	0.687882	0.628817	0.669636	0.561277	0.766466	0
792	0.277834	0.312041	0.36195	0.361481	0.445946	0.325769	0.443763	0.387379	0.449922	0.507165	0.598964	0.702341	0.672753	0.689063	0.622009	0.815477	0.283408	0.309746	0.430303	0.423232	0.519484	0.319313	0.477109	0.397515	0.530136	0.563121	0.59952	0.719899	0.666592	0.703125	0.61744	0.826722	0.270402	0.291775	0.444343	0.501016	0.6544	0.269825	0.529437	0.556428	0.649425	0.324002	0.559112	0.687523	0.628534	0.669303	0.561005	0.766097	0
793	0.277692	0.311919	0.361829	0.361358	0.445779	0.32563	0.443555	0.387166	0.449745	0.506993	0.598777	0.702172	0.67254	0.688874	0.621778	0.815325	0.283318	0.309619	0.430172	0.423086	0.519331	0.319083	0.476841	0.397317	0.529895	0.562898	0.599275	0.71973	0.666362	0.702888	0.617227	0.826558	0.27029	0.291589	0.444161	0.500663	0.654091	0.269619	0.529068	0.556197	0.648789	0.322011	0.558743	0.687234	0.628198	0.669062	0.560746	0.765765	0
794	0.277542	0.311798	0.361682	0.36121	0.445658	0.325453	0.443362	0.386958	0.449565	0.506798	0.598608	0.702008	0.672303	0.688645	0.621561	0.815129	0.283229	0.309495	0.429973	0.422931	0.519184	0.318916	0.476576	0.397029	0.529706	0.562695	0.59907	0.719511	0.666105	0.702716	0.617022	0.826415	0.270175	0.291449	0.443902	0.500313	0.653764	0.269428	0.528679	0.555929	0.648424	0.319588	0.55853	0.686843	0.627846	0.668736	0.560461	0.765485	0
795	0.277409	0.311701	0.361564	0.361068	0.445523	0.325304	0.443132	0.386788	0.449402	0.506628	0.598382	0.701794	0.672053	0.688498	0.621346	0.814971	0.283115	0.309368	0.429812	0.422787	0.519056	0.318763	0.476305	0.396803	0.529476	0.562505	0.598863	0.719312	0.665886	0.702499	0.616715	0.826268	0.270018	0.291306	0.443711	0.500027	0.653322	0.26924	0.528276	0.555675	0.64775	0.317857	0.55826	0.686479	0.627606	0.668445	0.560074	0.765182	0
796	0.277248	0.31158	0.361464	0.360918	0.445392	0.325205	0.442971	0.386644	0.449222	0.506472	0.598131	0.701554	0.671803	0.68833	0.621076	0.814795	0.282993	0.30923	0.429693	0.422623	0.518894	0.318583	0.476042	0.396584	0.529309	0.562294	0.598573	0.719103	0.665619	0.702257	0.616466	0.826064	0.269858	0.291136	0.443511	0.49978	0.653086	0.269002	0.527771	0.555458	0.647027	0.316405	0.55796	0.686113	0.627265	0.668177	0.559736	0.76483	0
797	0.277125	0.311442	0.361304	0.360828	0.445269	0.325083	0.442712	0.38644	0.449	0.50621	0.597928	0.701339	0.671548	0.688182	0.620799	0.814595	0.282853	0.309102	0.429528	0.422433	0.518726	0.318392	0.475825	0.3964	0.529114	0.56209	0.59838	0.718917	0.665386	0.702018	0.616197	0.82585	0.269681	0.290973	0.44329	0.499478	0.65281	0.268839	0.527434	0.55527	0.646134	0.314569	0.557662	0.685732	0.626954	0.667883	0.559353	0.764504	0
798	0.277009	0.311327	0.36113	0.360647	0.44514	0.324963	0.442545	0.386224	0.448821	0.506024	0.597731	0.70116	0.67134	0.68802	0.620555	0.814448	0.282747	0.308979	0.429334	0.422307	0.518548	0.318148	0.475629	0.396212	0.528897	0.561923	0.59816	0.718685	0.665179	0.70175	0.615933	0.825696	0.269559	0.290844	0.443077	0.499182	0.652436	0.26864	0.526986	0.55497	0.645554	0.312596	0.557438	0.685426	0.626743	0.667523	0.559062	0.764074	0
799	0.276896	0.311231	0.361005	0.360537	0.444996	0.324829	0.442381	0.386072	0.448673	0.50581	0.597533	0.700964	0.671144	0.687834	0.620326	0.814212	0.28262	0.308803	0.429158	0.422203	0.518435	0.317978	0.475453	0.396014	0.528694	0.561714	0.597923	0.718507	0.664944	0.701518	0.61573	0.82551	0.269428	0.29068	0.442848	0.498894	0.652092	0.268466	0.526609	0.554684	0.644807	0.310716	0.55712	0.685089	0.626522	0.667256	0.558727	0.763739	0
800	0.276777	0.311071	0.360886	0.360427	0.444876	0.324661	0.442159	0.385864	0.448532	0.505602	0.597312	0.700757	0.670873	0.687659	0.620112	0.814033	0.282495	0.308681	0.429012	0.422051	0.518209	0.31779	0.475191	0.395846	0.528456	0.561452	0.597779	0.718343	0.664733	0.701328	0.615491	0.825305	0.269293	0.290506	0.442639	0.498504	0.651752	0.268223	0.526269	0.554432	0.644182	0.309103	0.556781	0.684762	0.626272	0.666978	0.558443	0.763393	0
801	0.276662	0.310968	0.360786	0.360304	0.444715	0.324519	0.44199	0.38572	0.448389	0.505435	0.597124	0.700594	0.670659	0.687438	0.619921	0.813853	0.282416	0.308539	0.428879	0.421929	0.518064	0.31754	0.474998	0.395641	0.528294	0.561237	0.597568	0.718183	0.664514	0.701127	0.615279	0.825103	0.269182	0.290368	0.442472	0.498105	0.651341	0.267991	0.526013	0.554188	0.64366	0.307697	0.556509	0.684325	0.625889	0.666607	0.558081	0.76312	0
802	0.276566	0.310819	0.360655	0.360169	0.444613	0.324391	0.441794	0.385616	0.448217	0.505281	0.596933	0.700469	0.670495	0.687252	0.619711	0.813642	0.282318	0.308404	0.428713	0.421822	0.517915	0.317389	0.47471	0.395461	0.528086	0.561018	0.59734	0.718003	0.664376	0.700877	0.615007	0.824922	0.269062	0.290198	0.442266	0.497799	0.651023	0.26774	0.525665	0.553941	0.642921	0.305608	0.556243	0.683909	0.625551	0.666289	0.557746	0.762777	0
803	0.276431	0.310705	0.360552	0.360036	0.444469	0.324271	0.44154	0.385391	0.448082	0.505133	0.596776	0.700304	0.670286	0.68705	0.61948	0.813418	0.282166	0.308264	0.428518	0.421673	0.517714	0.317233	0.47455	0.39527	0.527892	0.560838	0.597138	0.717833	0.664189	0.70065	0.614757	0.824784	0.268922	0.290026	0.442089	0.4975	0.650677	0.267584	0.525262	0.553744	0.642325	0.304068	0.555961	0.683597	0.625244	0.66595	0.557445	0.762385	0
804	0.276329	0.310571	0.360443	0.359903	0.444338	0.324112	0.441353	0.38517	0.447943	0.504908	0.596593	0.700136	0.670071	0.686867	0.619251	0.813196	0.282047	0.308129	0.428379	0.421516	0.517547	0.316982	0.474323	0.395081	0.527695	0.560675	0.596917	0.717658	0.663977	0.700404	0.614483	0.824571	0.268784	0.289853	0.441819	0.497031	0.650277	0.267355	0.524751	0.553464	0.641676	0.302686	0.555658	0.683108	0.624922	0.665704	0.557172	0.761981	0
805	0.276216	0.31043	0.360328	0.359775	0.444193	0.323989	0.441107	0.384976	0.447783	0.504758	0.596424	0.700005	0.669887	0.686706	0.619094	0.813032	0.281916	0.308001	0.428214	0.421379	0.517375	0.316804	0.474066	0.394897	0.527411	0.560453	0.596706	0.717516	0.663806	0.700162	0.614273	0.824332	0.268646	0.289621	0.441628	0.496657	0.649931	0.267172	0.524356	0.553219	0.641085	0.301248	0.555431	0.682755	0.624531	0.665401	0.55683	0.761669	0
806	0.276081	0.310306	0.360182	0.359631	0.444037	0.32383	0.440908	0.384772	0.447617	0.504546	0.596262	0.699811	0.669621	0.686457	0.618873	0.812871	0.281775	0.307877	0.42803	0.421255	0.517229	0.316633	0.473764	0.394632	0.527217	0.560252	0.59648	0.717324	0.663609	0.699993	0.614112	0.824125	0.268502	0.289441	0.441425	0.496372	0.649535	0.266978	0.523957	0.55296	0.640478	0.299818	0.555063	0.682407	0.624237	0.665178	0.556547	0.761304	0
807	0.275954	0.31019	0.360065	0.359462	0.443914	0.323628	0.440734	0.384585	0.447449	0.504312	0.596106	0.699699	0.669387	0.686255	0.618635	0.812739	0.281629	0.307775	0.42788	0.421107	0.517064	0.31647	0.473546	0.394451	0.527061	0.560033	0.596284	0.717149	0.663309	0.699728	0.613923	0.823953	0.26837	0.289288	0.441256	0.496063	0.649202	0.266837	0.523615	0.55275	0.639841	0.298149	0.554792	0.682042	0.623962	0.664924	0.556233	0.760942	0
808	0.275831	0.310058	0.359923	0.359325	0.443802	0.323494	0.440534	0.384386	0.44727	0.504156	0.595916	0.699553	0.669161	0.686038	0.618458	0.812567	0.281474	0.307647	0.427724	0.420953	0.516903	0.316281	0.473376	0.394177	0.52688	0.55977	0.596052	0.716998	0.663095	0.699527	0.613674	0.823773	0.268241	0.28912	0.441069	0.495752	0.648793	0.26657	0.52313	0.552479	0.639251	0.296636	0.554549	0.681614	0.623628	0.664621	0.555934	0.76052	0
809	0.275701	0.30989	0.359775	0.35915	0.443681	0.323335	0.44038	0.384211	0.447095	0.503992	0.595745	0.699307	0.668939	0.685831	0.618231	0.812399	0.28135	0.307511	0.427584	0.420836	0.516754	0.316051	0.47308	0.393971	0.526712	0.559603	0.595882	0.716818	0.66289	0.699283	0.613481	0.823589	0.26813	0.288966	0.440813	0.495462	0.648464	0.266385	0.522719	0.552192	0.638573	0.294575	0.554284	0.681251	0.623339	0.664291	0.555634	0.760025	0
810	0.275569	0.30975	0.359641	0.358997	0.443539	0.323198	0.440203	0.383979	0.446934	0.503852	0.595594	0.699125	0.668693	0.685641	0.618007	0.812255	0.281251	0.307341	0.427449	0.420685	0.516621	0.315895	0.472856	0.393751	0.5265	0.559372	0.595603	0.716607	0.662607	0.699054	0.613241	0.82337	0.268004	0.288804	0.440671	0.495052	0.648085	0.266186	0.522256	0.551961	0.637854	0.292888	0.553971	0.680872	0.623094	0.664023	0.555361	0.759707	0
811	0.275453	0.309629	0.359505	0.358869	0.443398	0.323048	0.440008	0.383831	0.446756	0.503633	0.595429	0.698908	0.668488	0.685438	0.617846	0.812048	0.28115	0.307185	0.427299	0.420468	0.516448	0.315672	0.472631	0.393546	0.526326	0.559121	0.595378	0.716412	0.662386	0.698854	0.613014	0.823149	0.267859	0.288647	0.440417	0.494669	0.647731	0.265968	0.521805	0.551708	0.637193	0.291281	0.553691	0.680534	0.622777	0.663743	0.554974	0.759411	0
812	0.275327	0.309521	0.359345	0.358692	0.443256	0.322888	0.439745	0.38365	0.446577	0.503446	0.595248	0.698745	0.668287	0.685244	0.617639	0.81188	0.281026	0.307035	0.42717	0.420342	0.516302	0.315458	0.472397	0.393274	0.526085	0.55889	0.595191	0.716196	0.66213	0.698599	0.612799	0.822977	0.267731	0.288517	0.440211	0.494361	0.64739	0.265809	0.521381	0.55146	0.636576	0.289653	0.553307	0.680161	0.622426	0.663433	0.554696	0.759033	0
813	0.275196	0.309398	0.35921	0.358563	0.443141	0.322772	0.439541	0.383483	0.446404	0.503258	0.595029	0.698548	0.668015	0.68505	0.617456	0.811687	0.280932	0.306866	0.427029	0.420178	0.51613	0.31532	0.472139	0.393027	0.525894	0.558634	0.594934	0.716007	0.661886	0.698355	0.612577	0.822784	0.267583	0.288364	0.440042	0.493999	0.646994	0.26559	0.521091	0.551219	0.635968	0.287862	0.553069	0.6798	0.622167	0.663099	0.554354	0.758729	0
814	0.275067	0.309277	0.359062	0.358434	0.442997	0.32261	0.439352	0.383292	0.446244	0.503091	0.594845	0.698397	0.667737	0.684828	0.617258	0.811511	0.280817	0.306711	0.426856	0.420014	0.515998	0.315199	0.471934	0.392876	0.525725	0.558388	0.594692	0.715786	0.661702	0.698158	0.612258	0.822604	0.267474	0.288198	0.439828	0.49366	0.646677	0.265311	0.520647	0.551	0.635415	0.285729	0.552785	0.679571	0.621808	0.662811	0.554021	0.758424	0
815	0.27496	0.309149	0.358928	0.358325	0.442842	0.322469	0.439193	0.38315	0.446052	0.502901	0.594694	0.698217	0.667451	0.684626	0.617061	0.811334	0.280711	0.306577	0.426712	0.419878	0.515876	0.315003	0.47177	0.392672	0.525544	0.558164	0.59447	0.715637	0.661523	0.69801	0.612039	0.82245	0.267338	0.28808	0.439662	0.493411	0.646403	0.265117	0.520206	0.550596	0.634715	0.283911	0.552567	0.679202	0.621516	0.662551	0.553607	0.758074	0
816	0.274812	0.309031	0.358812	0.35817	0.442744	0.322311	0.438915	0.382974	0.445893	0.502681	0.59445	0.698043	0.667218	0.684381	0.61686	0.811188	0.280586	0.306434	0.426591	0.419673	0.51571	0.314846	0.471487	0.392441	0.5254	0.557986	0.594298	0.715463	0.661298	0.697798	0.611839	0.822281	0.267186	0.287925	0.43946	0.492996	0.646027	0.264924	0.519755	0.550387	0.633813	0.282337	0.552331	0.678854	0.621188	0.662299	0.553245	0.757716	0
817	0.274699	0.308891	0.358698	0.358026	0.442616	0.322121	0.438725	0.382776	0.445761	0.502509	0.594331	0.697897	0.667013	0.684242	0.616635	0.811014	0.280468	0.306345	0.426428	0.419499	0.515516	0.314655	0.471217	0.392223	0.525232	0.557757	0.59411	0.715251	0.661013	0.697524	0.611571	0.82212	0.267062	0.287773	0.439258	0.49259	0.645603	0.264741	0.519365	0.550147	0.633239	0.280539	0.552077	0.678519	0.620889	0.662017	0.552934	0.757383	0
818	0.274572	0.308767	0.358557	0.357918	0.442479	0.321954	0.438551	0.382649	0.445593	0.502303	0.594122	0.697744	0.666794	0.68403	0.616423	0.810813	0.280341	0.306218	0.426294	0.419307	0.515367	0.314518	0.470959	0.392049	0.524988	0.55756	0.593843	0.715061	0.660804	0.697331	0.611353	0.821958	0.266908	0.287616	0.438999	0.492283	0.645225	0.264502	0.518936	0.549872	0.63279	0.279381	0.551863	0.678285	0.620619	0.661652	0.552554	0.757071	0
819	0.274442	0.308631	0.358434	0.35779	0.442306	0.321813	0.438317	0.382449	0.445365	0.502126	0.593956	0.69757	0.66652	0.683874	0.616198	0.810606	0.280194	0.306097	0.426091	0.419131	0.515239	0.314366	0.470764	0.391895	0.524796	0.557356	0.593656	0.714835	0.660595	0.697118	0.611149	0.821803	0.26676	0.287426	0.438795	0.491938	0.644975	0.264313	0.518519	0.549574	0.632196	0.277563	0.551564	0.67797	0.620357	0.661329	0.552318	0.756673	0
820	0.274346	0.308521	0.358322	0.357672	0.442206	0.321694	0.438125	0.382296	0.445204	0.501944	0.593839	0.69736	0.666287	0.683695	0.616011	0.81047	0.280055	0.305963	0.425967	0.419018	0.515101	0.314235	0.470518	0.391712	0.524597	0.557138	0.593459	0.714619	0.660366	0.696896	0.610886	0.821615	0.266634	0.287249	0.43866	0.491584	0.644744	0.264174	0.518111	0.549337	0.631624	0.275918	0.551312	0.677646	0.620055	0.661057	0.552019	0.75626	0
821	0.274228	0.308385	0.35813	0.357551	0.442061	0.321552	0.437882	0.382105	0.445054	0.50173	0.593665	0.697171	0.66607	0.683474	0.615764	0.810276	0.279969	0.305844	0.425846	0.418851	0.514921	0.314021	0.470309	0.391563	0.524424	0.556915	0.59327	0.714407	0.660152	0.696633	0.610607	0.821446	0.266529	0.287109	0.43847	0.491331	0.644445	0.263972	0.517625	0.549032	0.630891	0.27411	0.550949	0.677229	0.619819	0.660752	0.551746	0.755832	0
822	0.274121	0.308265	0.357994	0.357434	0.441919	0.321429	0.437649	0.381941	0.444888	0.501533	0.593515	0.696965	0.665888	0.683262	0.615551	0.810116	0.279867	0.305721	0.425664	0.418699	0.514756	0.313837	0.470053	0.391337	0.524188	0.556591	0.592998	0.714298	0.659944	0.696408	0.610379	0.821226	0.266372	0.286936	0.43824	0.490887	0.644078	0.263792	0.517126	0.548706	0.630399	0.272723	0.55075	0.676837	0.619595	0.660392	0.551437	0.755463	0
823	0.274014	0.308139	0.35787	0.357321	0.44177	0.321297	0.437488	0.381758	0.444745	0.501331	0.593355	0.696788	0.665667	0.683041	0.615316	0.809916	0.279781	0.305571	0.425446	0.418574	0.514608	0.313653	0.469794	0.391148	0.523943	0.556348	0.592721	0.71412	0.659726	0.69621	0.610153	0.820999	0.266203	0.286791	0.438053	0.490545	0.643743	0.263542	0.516687	0.548477	0.629721	0.270729	0.550507	0.676458	0.619259	0.660111	0.551131	0.755069	0
824	0.273904	0.30802	0.35773	0.357228	0.441643	0.321178	0.437253	0.381601	0.444571	0.501117	0.593133	0.696617	0.665425	0.682919	0.615084	0.809733	0.279657	0.305419	0.425285	0.418419	0.514474	0.313461	0.469497	0.390924	0.523794	0.556114	0.592491	0.713916	0.65944	0.695968	0.609893	0.820863	0.266061	0.286652	0.437884	0.490217	0.643386	0.263383	0.51625	0.548264	0.629164	0.269064	0.550261	0.67605	0.618914	0.659797	0.55081	0.754631	0
825	0.273715	0.307896	0.357606	0.357051	0.441499	0.321047	0.437064	0.381421	0.444413	0.500945	0.592964	0.696447	0.665219	0.682738	0.614804	0.809543	0.279526	0.305278	0.425153	0.418243	0.514304	0.313314	0.46933	0.390714	0.523597	0.555899	0.592272	0.713763	0.659238	0.695759	0.609661	0.820675	0.265873	0.28648	0.437704	0.489763	0.643019	0.263102	0.515765	0.547982	0.628507	0.266931	0.549912	0.675705	0.618604	0.659565	0.550511	0.754215	0
826	0.273582	0.307784	0.357478	0.356928	0.441369	0.320938	0.436837	0.381245	0.444269	0.500812	0.592765	0.696246	0.665042	0.682514	0.614615	0.809335	0.279397	0.305085	0.425019	0.418072	0.514158	0.313119	0.469096	0.390505	0.523405	0.555712	0.59204	0.713557	0.658972	0.695526	0.60949	0.820511	0.26573	0.286268	0.437444	0.489311	0.642635	0.262913	0.515365	0.54774	0.62787	0.264813	0.549643	0.675369	0.61828	0.659235	0.550211	0.753924	0
827	0.273461	0.307636	0.357328	0.356804	0.441235	0.320817	0.436621	0.381069	0.44411	0.500637	0.592564	0.696061	0.664839	0.682288	0.614462	0.809148	0.279226	0.304955	0.424889	0.417929	0.513976	0.31291	0.468866	0.390284	0.523203	0.555486	0.591775	0.71334	0.658766	0.695245	0.60924	0.820316	0.26559	0.286106	0.437246	0.489081	0.642223	0.26272	0.51487	0.547421	0.627341	0.263216	0.549313	0.674846	0.618085	0.658867	0.549933	0.753594	0
828	0.273326	0.307529	0.357202	0.356685	0.441104	0.320666	0.436434	0.380854	0.44395	0.500481	0.592405	0.69588	0.664623	0.682069	0.614141	0.808977	0.279127	0.30484	0.424704	0.417793	0.513819	0.312738	0.468621	0.390085	0.523042	0.555308	0.59159	0.713183	0.658532	0.695015	0.609047	0.820119	0.265478	0.285939	0.437013	0.488744	0.641793	0.262456	0.514572	0.547115	0.626664	0.261747	0.549081	0.674354	0.617826	0.658592	0.549624	0.753348	0
829	0.273205	0.3074	0.357062	0.356561	0.440978	0.320505	0.43623	0.38071	0.44373	0.500327	0.592248	0.695746	0.664407	0.681865	0.613922	0.808839	0.279047	0.304705	0.424594	0.417642	0.513696	0.312547	0.468421	0.389918	0.522875	0.555102	0.591431	0.712963	0.658322	0.694765	0.608811	0.819922	0.265343	0.285746	0.436829	0.488356	0.641504	0.262251	0.514078	0.546858	0.625908	0.26007	0.548772	0.673937	0.617634	0.658322	0.549299	0.753007	0
830	0.273076	0.30728	0.356916	0.356436	0.440832	0.320382	0.436055	0.380526	0.443571	0.500152	0.592059	0.695558	0.664209	0.681674	0.613691	0.808648	0.278918	0.304566	0.424395	0.417481	0.513523	0.312381	0.468182	0.389701	0.522638	0.554812	0.591251	0.712826	0.658133	0.694577	0.608567	0.819758	0.265211	0.285618	0.436605	0.488072	0.641135	0.262045	0.51372	0.546618	0.62513	0.258699	0.548526	0.673586	0.617237	0.658009	0.549019	0.752686	0
831	0.272909	0.307192	0.356784	0.356307	0.440713	0.320215	0.435888	0.380331	0.443414	0.499968	0.591883	0.695385	0.663923	0.681401	0.613498	0.80846	0.278833	0.304417	0.424242	0.417338	0.513396	0.312225	0.46794	0.389503	0.522464	0.554536	0.591035	0.71262	0.657922	0.694359	0.608338	0.819543	0.265101	0.285463	0.436405	0.48762	0.640897	0.261816	0.513322	0.546402	0.624382	0.256237	0.548236	0.673122	0.616946	0.657725	0.54877	0.752318	0
832	0.272819	0.30704	0.356654	0.356193	0.440592	0.320065	0.435679	0.380169	0.443249	0.49979	0.591682	0.69517	0.663737	0.681153	0.613333	0.808296	0.278741	0.304276	0.424119	0.417193	0.51321	0.312051	0.467636	0.389297	0.522277	0.554324	0.590781	0.712452	0.657687	0.694126	0.60813	0.819366	0.264976	0.285336	0.436238	0.48727	0.640498	0.261621	0.51298	0.546089	0.623761	0.254912	0.547987	0.672774	0.616647	0.657411	0.548465	0.751996	0
833	0.272704	0.306925	0.356526	0.356034	0.44044	0.319909	0.435508	0.37999	0.44307	0.499634	0.591466	0.694973	0.663517	0.680981	0.61313	0.808067	0.278617	0.304106	0.423959	0.417084	0.513042	0.311904	0.467364	0.389051	0.52208	0.554073	0.590574	0.712226	0.657465	0.693907	0.607913	0.819176	0.264871	0.285146	0.436054	0.486936	0.640172	0.261366	0.512455	0.545779	0.622905	0.253243	0.547719	0.67229	0.616399	0.657119	0.548195	0.751643	0
834	0.272592	0.306802	0.35636	0.355906	0.440308	0.319787	0.435252	0.379789	0.442916	0.499483	0.591274	0.694748	0.663257	0.680747	0.612942	0.807886	0.278507	0.30397	0.423803	0.416917	0.512912	0.311694	0.467132	0.388838	0.521932	0.553859	0.590312	0.712017	0.657214	0.693687	0.607705	0.818914	0.264729	0.284948	0.4358	0.486589	0.639649	0.261163	0.511968	0.545519	0.622081	0.251439	0.547409	0.67204	0.616166	0.656868	0.547882	0.751324	0
835	0.272433	0.306651	0.356243	0.355795	0.440189	0.319623	0.435071	0.379569	0.442771	0.499252	0.59105	0.694613	0.663113	0.680583	0.612806	0.807691	0.278384	0.303862	0.423679	0.416733	0.512798	0.311458	0.466942	0.388568	0.521754	0.553621	0.590171	0.711869	0.657014	0.693542	0.607455	0.818755	0.264626	0.284799	0.435598	0.486192	0.639219	0.260995	0.511567	0.545136	0.621325	0.249087	0.547069	0.671625	0.615872	0.656562	0.547517	0.750988	0
836	0.272323	0.30653	0.35608	0.355673	0.440052	0.319469	0.434876	0.379423	0.442599	0.499012	0.590856	0.694418	0.662874	0.680403	0.612607	0.80757	0.278261	0.303727	0.42353	0.41658	0.512664	0.311255	0.466714	0.388393	0.521534	0.553418	0.58998	0.711691	0.65681	0.693312	0.607166	0.818525	0.264483	0.284592	0.435421	0.485743	0.638883	0.260759	0.51124	0.544849	0.620704	0.247652	0.546741	0.671323	0.615547	0.656304	0.547199	0.750709	0
837	0.272196	0.306372	0.355977	0.355553	0.439948	0.319333	0.434734	0.379226	0.442432	0.498835	0.590681	0.6942	0.662645	0.680207	0.612404	0.807361	0.278139	0.303582	0.423399	0.416431	0.512522	0.311089	0.466455	0.38822	0.521335	0.553239	0.589753	0.711502	0.656578	0.693168	0.606936	0.818349	0.264352	0.284431	0.43516	0.48544	0.638504	0.260577	0.510797	0.544575	0.620096	0.245725	0.546454	0.670961	0.615232	0.655982	0.546958	0.750365	0
838	0.272073	0.306252	0.355847	0.355436	0.439839	0.319198	0.434516	0.379016	0.442225	0.49862	0.590512	0.69403	0.662468	0.680059	0.612165	0.807177	0.278005	0.303464	0.423235	0.416292	0.512336	0.310924	0.466286	0.387959	0.521191	0.553011	0.589548	0.711377	0.656278	0.692952	0.606714	0.818121	0.264259	0.284235	0.434984	0.485117	0.638126	0.260375	0.510337	0.544269	0.61935	0.243675	0.546203	0.670526	0.615032	0.655669	0.546625	0.750064	0
839	0.271964	0.306085	0.355743	0.355257	0.439713	0.319022	0.434288	0.378818	0.442054	0.498418	0.590289	0.693873	0.662236	0.679896	0.611949	0.806994	0.277854	0.303339	0.423094	0.416151	0.51218	0.310759	0.466007	0.387723	0.521006	0.55284	0.589273	0.711214	0.656019	0.692676	0.60653	0.817965	0.264104	0.284026	0.434833	0.484751	0.637684	0.260145	0.509942	0.544038	0.618623	0.241635	0.545848	0.670146	0.614754	0.655405	0.546239	0.749557	0
840	0.271837	0.305935	0.355622	0.35514	0.4396	0.318851	0.434095	0.378689	0.441891	0.498227	0.590059	0.693737	0.662071	0.679698	0.611769	0.806789	0.27773	0.303244	0.422954	0.416016	0.512053	0.310639	0.46577	0.387487	0.52079	0.552647	0.589101	0.711032	0.655813	0.692394	0.606326	0.817769	0.263982	0.283849	0.434634	0.484391	0.637431	0.259946	0.509608	0.543657	0.617968	0.23986	0.545632	0.669703	0.614409	0.655024	0.545899	0.74918	0
841	0.271716	0.305804	0.355515	0.355033	0.439479	0.318696	0.433915	0.378488	0.441757	0.498037	0.589823	0.693566	0.661823	0.679523	0.611592	0.806624	0.277612	0.303112	0.422759	0.415877	0.511918	0.31038	0.465514	0.387256	0.52063	0.552403	0.588906	0.710774	0.655562	0.69213	0.606073	0.817554	0.263847	0.283692	0.434408	0.483983	0.637018	0.259717	0.509031	0.543295	0.617174	0.238066	0.545247	0.669364	0.614105	0.654769	0.545577	0.748841	0
842	0.271604	0.305732	0.35542	0.354909	0.439321	0.318522	0.433742	0.378379	0.441596	0.497849	0.589649	0.693364	0.661548	0.679381	0.611359	0.806473	0.27749	0.302997	0.422608	0.415706	0.511776	0.310208	0.465278	0.387053	0.520458	0.552234	0.58874	0.710562	0.655395	0.691953	0.605852	0.817323	0.263684	0.28353	0.434185	0.483539	0.636627	0.259475	0.508599	0.542942	0.616501	0.236168	0.544959	0.669023	0.613832	0.654568	0.545219	0.748418	0
843	0.27148	0.305608	0.355325	0.354787	0.439189	0.318382	0.433497	0.378215	0.441423	0.49766	0.589491	0.69316	0.661315	0.679133	0.611172	0.806316	0.277406	0.302863	0.422445	0.415538	0.511634	0.309992	0.465087	0.386796	0.520271	0.552057	0.5885	0.710406	0.655149	0.691744	0.605606	0.817112	0.263535	0.283357	0.433977	0.483064	0.636365	0.259282	0.50825	0.542651	0.615703	0.234593	0.544663	0.668628	0.613508	0.654261	0.544839	0.748124	0
844	0.271338	0.305516	0.355195	0.354686	0.439045	0.318253	0.43335	0.378007	0.441275	0.497503	0.589308	0.692975	0.661051	0.678959	0.611016	0.806159	0.277309	0.302695	0.422311	0.415372	0.511487	0.309841	0.464823	0.38663	0.520064	0.551867	0.588274	0.710187	0.654914	0.691478	0.605378	0.816931	0.263419	0.283188	0.433801	0.482772	0.635918	0.25905	0.507756	0.542414	0.615029	0.233198	0.544356	0.66829	0.613071	0.653973	0.544518	0.747843	0
845	0.271225	0.305361	0.355074	0.35454	0.438873	0.318109	0.433124	0.377871	0.441109	0.497266	0.589144	0.692786	0.660873	0.67875	0.610796	0.806026	0.277211	0.302549	0.422112	0.415202	0.511294	0.309613	0.464604	0.386446	0.519903	0.551647	0.58809	0.710046	0.654722	0.69128	0.605148	0.816769	0.263268	0.283033	0.433594	0.482364	0.635622	0.258883	0.507366	0.542069	0.614094	0.231483	0.544081	0.667887	0.61283	0.653676	0.544205	0.747437	0
846	0.271141	0.305234	0.354922	0.354394	0.438761	0.317982	0.432918	0.377711	0.440933	0.497039	0.588959	0.692615	0.660661	0.678539	0.610532	0.805843	0.277074	0.302419	0.421909	0.415068	0.51107	0.309405	0.464345	0.38624	0.519699	0.551446	0.58787	0.709875	0.654409	0.691129	0.604951	0.816519	0.263168	0.282862	0.43335	0.4819	0.635317	0.258707	0.506921	0.541749	0.613179	0.229177	0.543698	0.667523	0.612475	0.653338	0.543891	0.747121	0
847	0.271052	0.305096	0.35478	0.354294	0.438633	0.317884	0.432696	0.377547	0.440765	0.496819	0.588804	0.692472	0.660462	0.678357	0.610322	0.805718	0.276965	0.302286	0.421705	0.414918	0.510949	0.309209	0.464136	0.385992	0.519487	0.551175	0.587673	0.709654	0.654217	0.690873	0.604769	0.816317	0.263004	0.282713	0.433138	0.481408	0.634873	0.258512	0.506511	0.541471	0.612498	0.227437	0.543411	0.667179	0.612233	0.653105	0.543607	0.746728	0
848	0.270936	0.304961	0.354691	0.354181	0.438479	0.317768	0.432531	0.377393	0.440515	0.496576	0.5886	0.692299	0.660231	0.678161	0.610116	0.805556	0.276837	0.302156	0.421589	0.414809	0.5108	0.309081	0.463905	0.385799	0.519339	0.550964	0.587471	0.709397	0.653982	0.69064	0.604474	0.816081	0.262911	0.28257	0.432924	0.481064	0.634544	0.258301	0.506071	0.541135	0.6117	0.225159	0.543122	0.666707	0.611942	0.652799	0.543281	0.746405	0
849	0.270791	0.304858	0.354545	0.354076	0.43838	0.317632	0.432298	0.377269	0.440333	0.49639	0.588453	0.692122	0.66003	0.677986	0.609934	0.805377	0.276737	0.302017	0.42142	0.414682	0.510654	0.308878	0.46363	0.385591	0.519193	0.550767	0.587281	0.709164	0.653815	0.690415	0.604255	0.81592	0.262792	0.282381	0.432747	0.480693	0.634128	0.258042	0.5055	0.540791	0.611019	0.223374	0.542843	0.66635	0.611532	0.65251	0.543082	0.746021	0
850	0.270698	0.304764	0.35443	0.353955	0.438247	0.317508	0.43208	0.377116	0.44015	0.496192	0.588261	0.691925	0.659858	0.677793	0.609709	0.805183	0.276594	0.301907	0.421233	0.414506	0.510462	0.308685	0.463418	0.385384	0.519005	0.550459	0.587101	0.708951	0.653606	0.690164	0.60394	0.815671	0.262667	0.282191	0.43254	0.480368	0.63359	0.257848	0.50493	0.540511	0.610244	0.221643	0.542523	0.666002	0.611328	0.652193	0.542817	0.745573	0
851	0.270576	0.304625	0.354296	0.353844	0.4381	0.317378	0.431852	0.376943	0.439985	0.49598	0.588106	0.69172	0.65966	0.677616	0.60949	0.805017	0.276504	0.30177	0.421102	0.414397	0.510334	0.308479	0.463237	0.385173	0.518867	0.55018	0.586913	0.708728	0.653387	0.689961	0.603681	0.815505	0.262517	0.282015	0.432308	0.479865	0.633188	0.257589	0.50446	0.540237	0.609455	0.220057	0.542264	0.665625	0.611064	0.651879	0.542453	0.745239	0
852	0.270453	0.304485	0.354152	0.353733	0.437969	0.317259	0.431638	0.376785	0.43982	0.495823	0.587862	0.691553	0.659433	0.677425	0.609301	0.804824	0.276383	0.301645	0.420945	0.414283	0.510224	0.308291	0.462997	0.384955	0.518668	0.549958	0.586655	0.708545	0.65317	0.689777	0.603474	0.815346	0.262375	0.281858	0.43209	0.479445	0.63271	0.257312	0.504087	0.540021	0.608689	0.218033	0.541922	0.665152	0.610736	0.651609	0.542191	0.744908	0
853	0.270339	0.304385	0.354014	0.353613	0.437846	0.317119	0.431446	0.376599	0.439641	0.495586	0.587658	0.691327	0.659207	0.67729	0.609107	0.804619	0.27625	0.301525	0.420793	0.414148	0.510069	0.308092	0.46274	0.38466	0.518504	0.549703	0.586512	0.708314	0.652976	0.689585	0.603209	0.815184	0.262273	0.281634	0.43191	0.479185	0.632195	0.257085	0.503556	0.539739	0.608077	0.21613	0.541668	0.664722	0.610458	0.651394	0.541735	0.74464	0
854	0.270218	0.304271	0.353885	0.353501	0.4377	0.316976	0.431268	0.37644	0.439453	0.495391	0.587498	0.691185	0.658942	0.677103	0.608925	0.804448	0.27614	0.301375	0.420655	0.414006	0.509893	0.307928	0.462557	0.384469	0.518351	0.549444	0.586296	0.708099	0.652675	0.689412	0.602958	0.815006	0.26215	0.281512	0.431673	0.478865	0.631904	0.256929	0.503047	0.539485	0.607304	0.21436	0.541303	0.664316	0.610138	0.651121	0.541536	0.744373	0
855	0.270117	0.304182	0.353753	0.353373	0.437559	0.316831	0.43098	0.376278	0.43923	0.495219	0.587331	0.690986	0.658715	0.676877	0.608711	0.804269	0.276011	0.30128	0.420462	0.413875	0.509751	0.307744	0.462372	0.384319	0.518172	0.549268	0.586034	0.707835	0.652416	0.689233	0.602768	0.814831	0.262012	0.281372	0.431462	0.4785	0.631448	0.256723	0.502437	0.539215	0.606539	0.212656	0.540938	0.663789	0.609833	0.650805	0.541224	0.743997	0
856	0.270008	0.304034	0.353625	0.353245	0.437468	0.316677	0.43075	0.376159	0.439078	0.495047	0.587137	0.690776	0.658501	0.676723	0.608541	0.804105	0.275836	0.301146	0.420313	0.413715	0.509596	0.307604	0.462162	0.384095	0.518039	0.548986	0.585772	0.707626	0.652097	0.689005	0.602521	0.814684	0.261892	0.281244	0.431246	0.478095	0.631048	0.256543	0.501987	0.538938	0.605688	0.210857	0.540651	0.663466	0.609554	0.650412	0.540942	0.743619	0
857	0.269884	0.30392	0.353486	0.35314	0.437299	0.316573	0.4306	0.37603	0.438948	0.494854	0.586931	0.690562	0.658341	0.676556	0.60837	0.803886	0.27574	0.300995	0.420152	0.413574	0.509484	0.307455	0.461878	0.383927	0.517865	0.548787	0.585514	0.707412	0.651842	0.688838	0.602326	0.814495	0.261796	0.281092	0.4311	0.477668	0.630555	0.25635	0.501515	0.538545	0.605005	0.208933	0.5404	0.663146	0.609332	0.650054	0.540587	0.743268	0
858	0.269774	0.303797	0.353345	0.352998	0.437181	0.316442	0.430414	0.375825	0.438818	0.494697	0.586727	0.690321	0.658173	0.676405	0.608199	0.803748	0.275631	0.300864	0.420011	0.413445	0.509336	0.307295	0.461644	0.383724	0.517716	0.548584	0.585247	0.7072	0.651576	0.688609	0.602073	0.814283	0.261664	0.280952	0.430915	0.477345	0.630172	0.25614	0.500918	0.538262	0.604328	0.207614	0.540048	0.662635	0.609026	0.649742	0.540284	0.742863	0
859	0.269672	0.303687	0.353206	0.352887	0.43704	0.316308	0.430208	0.375679	0.438676	0.494538	0.586525	0.690148	0.65793	0.676209	0.608024	0.803627	0.275503	0.300747	0.419879	0.413274	0.50916	0.307065	0.461368	0.383561	0.517565	0.548312	0.585063	0.70703	0.651349	0.68838	0.601816	0.814083	0.261514	0.280757	0.430695	0.476881	0.629806	0.255885	0.500447	0.537996	0.603598	0.206254	0.539759	0.662346	0.608727	0.649439	0.539986	0.742459	0
860	0.269528	0.303611	0.353091	0.352731	0.436884	0.316151	0.430059	0.375534	0.43854	0.494304	0.586324	0.689952	0.657732	0.675988	0.607871	0.803487	0.27539	0.30061	0.419746	0.413125	0.509045	0.306918	0.461143	0.383334	0.517372	0.548087	0.584837	0.706835	0.65115	0.688164	0.601513	0.81395	0.261398	0.280619	0.43048	0.476424	0.629344	0.255728	0.499888	0.537657	0.602883	0.204752	0.539462	0.662001	0.608474	0.64915	0.539661	0.742056	0
861	0.269428	0.303486	0.352934	0.35262	0.436767	0.316061	0.429912	0.375348	0.438366	0.494092	0.586114	0.689714	0.65755	0.675791	0.607693	0.803356	0.275276	0.300482	0.41959	0.412981	0.508858	0.30672	0.460892	0.383166	0.51716	0.547851	0.584623	0.70663	0.650876	0.687909	0.601269	0.813753	0.261266	0.280461	0.430286	0.476037	0.629012	0.255586	0.499483	0.537364	0.601949	0.202954	0.539155	0.661687	0.608207	0.64886	0.539433	0.741759	0
862	0.269296	0.303345	0.352768	0.352482	0.436631	0.315945	0.429706	0.375135	0.438183	0.493965	0.585882	0.689532	0.657354	0.675605	0.60751	0.80313	0.275117	0.300258	0.419451	0.412814	0.508731	0.306504	0.460628	0.383007	0.516979	0.547642	0.584396	0.706431	0.650651	0.687673	0.601079	0.813574	0.261153	0.280288	0.430029	0.47552	0.628617	0.255385	0.499012	0.537087	0.601337	0.201396	0.538808	0.661342	0.607832	0.648521	0.539067	0.741411	0
863	0.269174	0.303197	0.352637	0.352337	0.436537	0.315767	0.429537	0.374947	0.43803	0.493752	0.585742	0.689327	0.657157	0.675417	0.607331	0.802932	0.274997	0.300138	0.419263	0.412638	0.5086	0.306324	0.460329	0.3828	0.516759	0.547441	0.584181	0.70623	0.650466	0.68749	0.600839	0.813369	0.261041	0.280153	0.429778	0.475219	0.628166	0.255206	0.498603	0.536774	0.600551	0.199415	0.538544	0.660976	0.607478	0.648275	0.538739	0.740984	0
864	0.269049	0.303097	0.352513	0.35222	0.436428	0.315629	0.429345	0.374742	0.437903	0.493546	0.585572	0.689121	0.656975	0.675181	0.607151	0.802749	0.274877	0.300006	0.419071	0.412507	0.508433	0.306052	0.460067	0.38256	0.516586	0.547224	0.583938	0.70605	0.65024	0.687291	0.600563	0.813195	0.26095	0.279987	0.429556	0.474776	0.627883	0.25504	0.498044	0.536546	0.599723	0.197847	0.538171	0.660645	0.607225	0.647945	0.538385	0.740543	0
865	0.268927	0.302998	0.352417	0.352104	0.436279	0.315473	0.429148	0.374513	0.437755	0.493354	0.585359	0.688888	0.656788	0.674999	0.606924	0.802586	0.274757	0.299906	0.41892	0.412338	0.508273	0.305856	0.459805	0.382324	0.516379	0.54701	0.583727	0.70589	0.649993	0.687064	0.600271	0.812969	0.260816	0.279767	0.429343	0.474367	0.62759	0.254898	0.497554	0.536268	0.599073	0.196366	0.537856	0.660337	0.606891	0.64766	0.538043	0.740188	0
866	0.26882	0.302892	0.352306	0.351981	0.436151	0.31532	0.428963	0.374315	0.437623	0.493146	0.585145	0.68872	0.656552	0.674805	0.606723	0.802454	0.274597	0.299771	0.418749	0.412171	0.508131	0.305701	0.459644	0.382127	0.516154	0.546808	0.583496	0.705711	0.649786	0.686835	0.600101	0.812792	0.260721	0.27963	0.429096	0.473934	0.627116	0.254723	0.497037	0.535942	0.598307	0.194202	0.537549	0.659905	0.606682	0.647375	0.537676	0.739683	0
867	0.268707	0.3028	0.352205	0.351868	0.436021	0.315201	0.428807	0.37413	0.437449	0.492972	0.584972	0.688556	0.656392	0.67461	0.606519	0.802313	0.274494	0.29966	0.418602	0.412012	0.507993	0.305488	0.459315	0.381944	0.515955	0.546494	0.583214	0.705492	0.649467	0.686573	0.59985	0.812577	0.260594	0.27948	0.428945	0.473644	0.626539	0.254484	0.496566	0.535634	0.597648	0.192379	0.53727	0.659422	0.606404	0.647092	0.537387	0.739223	0
868	0.268617	0.302649	0.352086	0.351753	0.435912	0.315033	0.428634	0.373972	0.437272	0.492759	0.584795	0.688408	0.656119	0.674418	0.606343	0.802106	0.274347	0.299505	0.418403	0.411877	0.507819	0.305325	0.459118	0.381791	0.515806	0.546311	0.582973	0.705251	0.64923	0.686421	0.599658	0.812401	0.26051	0.279291	0.428695	0.473272	0.626161	0.254297	0.496074	0.535328	0.596982	0.190735	0.536989	0.659108	0.606173	0.646841	0.53693	0.73895	0
869	0.268488	0.302525	0.35192	0.351624	0.43576	0.314919	0.428464	0.373811	0.437087	0.492544	0.584624	0.688216	0.655948	0.67424	0.606071	0.801977	0.274228	0.299361	0.418252	0.411719	0.507698	0.30511	0.458898	0.381553	0.515672	0.546076	0.582739	0.705067	0.648964	0.686204	0.599439	0.812244	0.260352	0.279147	0.428441	0.472809	0.625543	0.254111	0.495497	0.535108	0.59622	0.18932	0.53671	0.658741	0.60588	0.646487	0.53667	0.738619	0
870	0.268351	0.302365	0.351801	0.351523	0.43559	0.314774	0.428231	0.373682	0.436886	0.492313	0.58445	0.688041	0.655675	0.674026	0.605869	0.801809	0.274062	0.299229	0.418128	0.411559	0.507586	0.304943	0.458729	0.381342	0.515504	0.545873	0.582531	0.70485	0.64873	0.685969	0.599132	0.812044	0.260218	0.278994	0.428251	0.472467	0.625085	0.253919	0.495048	0.534812	0.595221	0.18769	0.53642	0.65843	0.605522	0.64615	0.536343	0.738293	0
871	0.268241	0.302215	0.351696	0.351416	0.435471	0.314672	0.428045	0.373474	0.436723	0.492139	0.584304	0.687808	0.65545	0.673873	0.605651	0.801601	0.273953	0.299121	0.417939	0.411387	0.507434	0.304691	0.458487	0.381147	0.515354	0.545619	0.582279	0.704717	0.6485	0.685745	0.598907	0.811867	0.260094	0.278862	0.42807	0.472162	0.624799	0.253716	0.494543	0.534448	0.594311	0.185492	0.536129	0.658012	0.605192	0.645729	0.535999	0.737958	0
872	0.268146	0.302119	0.351566	0.351313	0.435333	0.31456	0.427841	0.373311	0.436566	0.491982	0.584092	0.687618	0.655241	0.673703	0.60544	0.801414	0.273855	0.298993	0.417777	0.411235	0.507338	0.304538	0.458237	0.380948	0.515141	0.545413	0.582085	0.704426	0.648316	0.685506	0.598771	0.811695	0.259963	0.278694	0.427855	0.471821	0.624421	0.253493	0.494046	0.534126	0.593187	0.183454	0.535819	0.657634	0.604913	0.645536	0.535681	0.737633	0
873	0.268057	0.301977	0.351444	0.351178	0.43522	0.314401	0.427654	0.373161	0.436379	0.491792	0.583848	0.687443	0.655035	0.673509	0.605284	0.801273	0.273752	0.298887	0.417605	0.411036	0.507184	0.304378	0.457976	0.380747	0.514968	0.545153	0.581844	0.704267	0.648118	0.685311	0.598502	0.811453	0.259816	0.278534	0.427648	0.471385	0.623956	0.253183	0.49363	0.533696	0.592471	0.181616	0.535531	0.657225	0.604689	0.645203	0.535302	0.737196	0
874	0.267963	0.301828	0.351315	0.351071	0.435102	0.314243	0.42743	0.372984	0.436238	0.491584	0.583676	0.687274	0.654837	0.673318	0.605096	0.801104	0.273658	0.298758	0.417416	0.410901	0.507022	0.304195	0.457719	0.380573	0.514765	0.544947	0.581615	0.7041	0.647922	0.685121	0.598274	0.811251	0.259693	0.278374	0.427443	0.471002	0.623492	0.252969	0.493131	0.533323	0.59159	0.180142	0.535263	0.656857	0.60437	0.644865	0.534991	0.736893	0
875	0.267872	0.301715	0.351203	0.350974	0.434957	0.314069	0.427248	0.372814	0.436077	0.491396	0.583474	0.687111	0.654609	0.67312	0.604926	0.800928	0.273543	0.298631	0.417218	0.410761	0.506842	0.304033	0.457453	0.380324	0.514548	0.544738	0.581388	0.703912	0.647693	0.684872	0.598093	0.811083	0.25959	0.278249	0.427221	0.470488	0.623027	0.252761	0.49248	0.532994	0.590882	0.17882	0.534996	0.656445	0.604029	0.644534	0.534707	0.736577	0
876	0.267731	0.301608	0.351061	0.350869	0.434792	0.313956	0.427063	0.372653	0.435866	0.491217	0.58326	0.686999	0.654437	0.672969	0.604734	0.800763	0.273417	0.298482	0.416998	0.410615	0.506701	0.30386	0.457156	0.380116	0.514339	0.544482	0.581215	0.703721	0.647463	0.68468	0.597816	0.810847	0.259407	0.278097	0.427041	0.47004	0.622528	0.252526	0.492045	0.53272	0.589972	0.177028	0.534784	0.656061	0.603836	0.644224	0.534363	0.736194	0
877	0.267625	0.301511	0.350939	0.350766	0.434703	0.313789	0.426846	0.372477	0.435668	0.491072	0.583109	0.686849	0.654212	0.672831	0.604558	0.800605	0.273267	0.298364	0.416856	0.41047	0.506572	0.303692	0.4569	0.37993	0.514175	0.544164	0.581018	0.703559	0.647188	0.684474	0.597573	0.810654	0.259276	0.277905	0.426842	0.46967	0.622128	0.252356	0.491695	0.532391	0.589226	0.175439	0.534482	0.655649	0.603578	0.643846	0.534023	0.735786	0
878	0.267519	0.301388	0.350821	0.350663	0.434579	0.313639	0.426678	0.372325	0.4355	0.490932	0.582927	0.686661	0.653944	0.672626	0.604298	0.800488	0.273168	0.298224	0.416672	0.410356	0.506379	0.303521	0.456701	0.379788	0.513985	0.544035	0.580775	0.703348	0.646989	0.684256	0.597317	0.81054	0.259165	0.277727	0.426612	0.469192	0.621691	0.252135	0.491213	0.53214	0.588223	0.174151	0.534231	0.655339	0.60327	0.643565	0.533785	0.735318	0
879	0.267399	0.301246	0.350658	0.350519	0.434483	0.313473	0.426461	0.372155	0.435282	0.490732	0.582739	0.686468	0.653777	0.672413	0.604075	0.800304	0.273065	0.298087	0.416507	0.410204	0.506218	0.303308	0.456425	0.379646	0.513832	0.543724	0.580595	0.70311	0.646777	0.684071	0.59709	0.810337	0.259009	0.277598	0.426403	0.468763	0.621332	0.251925	0.490772	0.53179	0.587409	0.172522	0.533911	0.654981	0.602953	0.643325	0.533381	0.734869	0
880	0.267305	0.30113	0.350532	0.350402	0.43435	0.313322	0.426301	0.372009	0.435168	0.490577	0.582585	0.686267	0.653576	0.672291	0.60389	0.800158	0.272959	0.297972	0.416345	0.410041	0.506057	0.303122	0.456184	0.379471	0.513621	0.543472	0.580392	0.702886	0.646582	0.683867	0.596836	0.810176	0.258869	0.277388	0.426144	0.468189	0.620855	0.251717	0.490222	0.531491	0.586485	0.17097	0.533555	0.65462	0.602703	0.643042	0.533074	0.734496	0
881	0.26721	0.301001	0.350406	0.350299	0.434231	0.313197	0.426093	0.37182	0.43501	0.49039	0.582384	0.686103	0.653361	0.67213	0.603732	0.799938	0.272843	0.297824	0.416109	0.409865	0.505833	0.302953	0.456007	0.379244	0.513418	0.543277	0.580173	0.702631	0.646383	0.683661	0.596557	0.810014	0.258709	0.277215	0.425908	0.467826	0.620463	0.251523	0.489736	0.531213	0.585654	0.169239	0.533209	0.654195	0.602384	0.642729	0.532807	0.734102	0
882	0.267103	0.30088	0.350239	0.350184	0.434121	0.313028	0.425881	0.371631	0.434876	0.490167	0.582192	0.685868	0.65313	0.671935	0.603523	0.79978	0.272728	0.297734	0.415918	0.409743	0.505693	0.302757	0.455678	0.379023	0.51325	0.543057	0.579907	0.702408	0.646161	0.683385	0.59631	0.809801	0.2586	0.277062	0.425717	0.467445	0.619956	0.251284	0.489187	0.530891	0.584787	0.167344	0.532936	0.65381	0.602173	0.642442	0.532432	0.733651	0
883	0.266968	0.300731	0.350099	0.350084	0.434002	0.312853	0.42569	0.371414	0.43473	0.489955	0.582007	0.685668	0.652938	0.671731	0.603308	0.799615	0.272607	0.297589	0.415788	0.409596	0.505543	0.302606	0.455421	0.378808	0.513054	0.54285	0.579651	0.702149	0.645932	0.683169	0.596031	0.809657	0.258508	0.276921	0.425458	0.467076	0.619496	0.251071	0.488577	0.53049	0.583823	0.165064	0.532626	0.653378	0.601927	0.642155	0.532132	0.733345	0
884	0.266841	0.300593	0.349963	0.349933	0.433876	0.312716	0.425468	0.371256	0.434568	0.489722	0.581863	0.685513	0.652725	0.671466	0.603116	0.799435	0.272442	0.29743	0.415652	0.409438	0.505427	0.3024	0.455158	0.378631	0.51289	0.542584	0.57946	0.70188	0.645742	0.682893	0.595796	0.809451	0.258386	0.276707	0.425238	0.46659	0.618937	0.250854	0.488018	0.530126	0.582844	0.163521	0.532403	0.653029	0.601644	0.64188	0.531862	0.732926	0
885	0.266712	0.30043	0.349839	0.349816	0.433762	0.312539	0.425298	0.371077	0.434391	0.489552	0.581629	0.685324	0.652506	0.671216	0.60292	0.799261	0.272338	0.297298	0.41552	0.409275	0.505309	0.302207	0.454923	0.378484	0.512677	0.542434	0.579228	0.701674	0.645541	0.682667	0.595617	0.809278	0.258278	0.276527	0.424973	0.466035	0.618464	0.250676	0.487587	0.529832	0.582	0.162013	0.532108	0.652583	0.601393	0.641629	0.531463	0.732606	0
886	0.266593	0.300308	0.349716	0.349691	0.433623	0.312405	0.425098	0.37088	0.434216	0.489315	0.581481	0.685163	0.652306	0.671034	0.602712	0.799022	0.272237	0.297163	0.415368	0.409134	0.505136	0.302075	0.454702	0.378314	0.512502	0.54218	0.579024	0.701481	0.645383	0.682438	0.59541	0.809079	0.258147	0.276332	0.424801	0.465538	0.617978	0.25046	0.487004	0.529482	0.581014	0.160327	0.531799	0.652199	0.601127	0.641365	0.531096	0.732279	0
887	0.266478	0.300189	0.349608	0.349567	0.433498	0.312291	0.424882	0.370727	0.434057	0.489109	0.581315	0.685002	0.652118	0.670844	0.602579	0.798804	0.272139	0.297002	0.415223	0.408979	0.504965	0.301883	0.45446	0.37815	0.512289	0.541956	0.578838	0.701292	0.645136	0.682235	0.595197	0.808906	0.257969	0.276183	0.424579	0.465038	0.61749	0.250247	0.486565	0.529217	0.580073	0.158525	0.531542	0.651856	0.600843	0.641096	0.530846	0.731935	0
888	0.266353	0.300033	0.349479	0.349429	0.433349	0.312108	0.424705	0.37057	0.433878	0.488904	0.5811	0.684859	0.65198	0.67064	0.602416	0.798628	0.271992	0.296879	0.415058	0.408815	0.504817	0.301676	0.454213	0.377876	0.51214	0.541763	0.578662	0.7011	0.644917	0.682008	0.594957	0.808699	0.257836	0.276033	0.424394	0.464638	0.617031	0.250061	0.485956	0.528985	0.579284	0.156564	0.531277	0.65152	0.600524	0.640786	0.530561	0.731642	0
889	0.266262	0.299921	0.349359	0.349293	0.433225	0.311992	0.424537	0.370404	0.433725	0.488747	0.580904	0.68468	0.65172	0.670469	0.602221	0.798458	0.271879	0.296708	0.414881	0.408633	0.504717	0.301455	0.453931	0.377713	0.511993	0.541513	0.578438	0.700924	0.644712	0.681771	0.594765	0.808487	0.257731	0.275876	0.424176	0.46428	0.616471	0.249911	0.485309	0.528676	0.578253	0.155008	0.531031	0.65104	0.600266	0.640473	0.530281	0.731233	0
890	0.266161	0.299795	0.349247	0.349171	0.4331	0.311867	0.424392	0.37031	0.433587	0.488558	0.580703	0.684521	0.651494	0.670327	0.602002	0.798272	0.271766	0.296571	0.414697	0.408482	0.504553	0.301265	0.453647	0.377427	0.511838	0.541282	0.578258	0.700739	0.644521	0.681586	0.594504	0.808333	0.257618	0.275748	0.423981	0.463854	0.615993	0.24967	0.484805	0.528355	0.577481	0.15373	0.530769	0.650652	0.599949	0.640176	0.530051	0.730952	0
891	0.266032	0.299693	0.349119	0.349031	0.433	0.311711	0.424237	0.370186	0.433425	0.488415	0.580539	0.684347	0.651331	0.67006	0.601823	0.798082	0.271648	0.296453	0.414537	0.408353	0.504375	0.301089	0.453386	0.377242	0.511662	0.541039	0.578057	0.700522	0.644318	0.681358	0.594278	0.8081	0.257506	0.275591	0.423767	0.463373	0.615589	0.249436	0.484118	0.527944	0.576616	0.151952	0.530536	0.650224	0.599613	0.639867	0.529745	0.730553	0
892	0.265908	0.299567	0.348961	0.348918	0.432878	0.311589	0.42409	0.370022	0.433269	0.488259	0.580293	0.684178	0.651146	0.66986	0.60162	0.797953	0.271539	0.296368	0.414387	0.408224	0.504171	0.30088	0.453157	0.377035	0.511526	0.540784	0.577833	0.700337	0.644135	0.681117	0.594092	0.80791	0.257393	0.275439	0.423571	0.462842	0.615077	0.249184	0.483696	0.527498	0.575706	0.15034	0.530309	0.649684	0.5993	0.639521	0.529455	0.730196	0
893	0.265819	0.29946	0.348826	0.348802	0.432738	0.311485	0.423954	0.369878	0.43311	0.488107	0.580072	0.683978	0.650913	0.669672	0.601398	0.797755	0.27143	0.296266	0.414246	0.408102	0.503996	0.300708	0.452925	0.376808	0.511389	0.540556	0.577588	0.700148	0.64394	0.680872	0.593875	0.807728	0.257259	0.275303	0.423338	0.462305	0.614516	0.248945	0.483042	0.527209	0.574784	0.148924	0.53003	0.649222	0.598956	0.639254	0.529028	0.729867	0
894	0.265708	0.299349	0.348717	0.348682	0.43265	0.311357	0.42376	0.369738	0.432944	0.487901	0.579882	0.683813	0.650686	0.669463	0.60123	0.797597	0.271306	0.296158	0.414081	0.407929	0.503776	0.300484	0.452715	0.376581	0.511251	0.540302	0.577351	0.69992	0.643693	0.680698	0.593653	0.807538	0.257132	0.275118	0.423187	0.461808	0.614018	0.24878	0.482627	0.526802	0.573988	0.147462	0.529783	0.64888	0.598577	0.638952	0.528816	0.729477	0
895	0.265591	0.299253	0.348615	0.348586	0.432551	0.311243	0.423602	0.369582	0.432758	0.487677	0.579697	0.683624	0.65053	0.66928	0.600968	0.797417	0.271191	0.296033	0.413929	0.407789	0.503623	0.300313	0.452478	0.376396	0.511085	0.540044	0.577174	0.699642	0.643366	0.680483	0.59343	0.807283	0.256996	0.275002	0.422953	0.461357	0.613626	0.24854	0.482132	0.52652	0.572852	0.145193	0.529523	0.648588	0.598282	0.638722	0.528446	0.729124	0
896	0.265467	0.299106	0.348511	0.348447	0.432452	0.311105	0.423415	0.369394	0.432594	0.487479	0.579532	0.683458	0.650344	0.669072	0.600764	0.797255	0.271084	0.2959	0.413817	0.407642	0.503489	0.300115	0.452262	0.376201	0.510883	0.539821	0.57693	0.699439	0.643132	0.680257	0.593237	0.807047	0.256861	0.274854	0.422748	0.460736	0.613142	0.248302	0.481627	0.526163	0.572002	0.143348	0.529201	0.648164	0.597981	0.638378	0.528103	0.728812	0
897	0.265332	0.298977	0.348385	0.348336	0.43232	0.310989	0.423208	0.369239	0.432449	0.487286	0.579365	0.68328	0.650136	0.668856	0.600577	0.797069	0.270976	0.295778	0.413643	0.407498	0.503315	0.299843	0.452096	0.376034	0.51063	0.539533	0.576692	0.699252	0.642879	0.680037	0.592984	0.806876	0.256733	0.274709	0.42256	0.460228	0.612626	0.248123	0.48091	0.525788	0.570838	0.141721	0.528893	0.647846	0.597673	0.638138	0.527819	0.72848	0
898	0.265235	0.298876	0.348271	0.348215	0.432186	0.310851	0.423047	0.369053	0.432304	0.487125	0.579203	0.683059	0.649957	0.668667	0.600327	0.796919	0.270863	0.295619	0.413481	0.407376	0.503144	0.299668	0.451831	0.375845	0.510446	0.539337	0.576503	0.69908	0.642693	0.679807	0.592825	0.806718	0.25659	0.274576	0.422303	0.459744	0.612084	0.247913	0.480509	0.525477	0.569606	0.140081	0.528674	0.647471	0.597414	0.637888	0.52749	0.727986	0
[truncated: 7,861 more rows]
[truncated: 95 more columns]
